# Supplementary material for: Palladium-catalysed C–H arylation of benzophospholes with aryl halides
Source: Royal Society of Chemistry journal article supplement (doi:10.1039/d2sc04311d), 2022-01-01
Supplement: d2sc04311d2.pdf [file d2sc04311d2.pdf]

## Supplementary Information

### Palladium-catalysed C–H arylation of benzophospholes with aryl halides

Shibo Xu,<sup>†</sup> Kazutoshi Nishimura,<sup>‡</sup> Kosuke Saito,<sup>‡</sup> Koji Hirano<sup>\*,†,‡</sup> and Masahiro Miura<sup>\*,†</sup>

<sup>†</sup>*Innovative Catalysis Science Division, Institute for Open and Transdisciplinary Research Initiatives  
(ICS-OTRI), Osaka University, Suita, Osaka 565-0871, Japan*

<sup>‡</sup>*Department of Applied Chemistry, Graduate School of Engineering, Osaka University, Suita, Osaka  
565-0871, Japan*

*k\_hirano@chem.eng.osaka-u.ac.jp; miura@chem.eng.osaka-u.ac.jp*

## Contents

|                                                              |          |
|--------------------------------------------------------------|----------|
| <b>Instrumentation and Chemicals</b>                         | S2–S3    |
| <b>Experimental Procedures</b>                               | S4–S6    |
| <b>Detailed Optimization Studies</b>                         | S7–S11   |
| <b>Hammett Studies</b>                                       | S12      |
| <b>Cyclic Voltammetry and Differential Pulse Voltammetry</b> | S13–S18  |
| <b>Absorption and Fluorescence Spectra</b>                   | S19      |
| <b>Theoretical Calculations</b>                              | S20–S21  |
| <b>X-Ray Analysis</b>                                        | S22–S23  |
| <b>Characterization Data for Products</b>                    | S24–S141 |
| <b>References</b>                                            | S142     |

### Instrumentation and Chemicals

$^1\text{H}$ ,  $^{13}\text{C}\{^1\text{H}\}$ ,  $^{19}\text{F}\{^1\text{H}\}$ , and  $^{31}\text{P}\{^1\text{H}\}$  NMR spectra were recorded at 400 MHz, 100 MHz, 376 MHz, and 162 MHz, respectively, for  $\text{CDCl}_3$  solutions. HRMS data were obtained by APCI using TOF. GC analysis was carried out using a silicon OV-17 column (i. d. 2.6 mm x 1.5 m) or CBP capillary column (i. d. 0.5 mm x 25 m). TLC analyses were performed on commercial glass plates bearing 0.25-mm layer of Merck Silica gel 60F<sub>254</sub>. Silica gel (Wakosil C-200, Wako Pure Chemical Co.) was used for column chromatography. Flash silica gel column chromatography was performed by Isolera One (Biotage). Gel permeation chromatography (GPC) was performed by LC-20AR (pump, SHIMADZU, 7.5 mL/min  $\text{CHCl}_3$  or EtOAc) and SPD-20A (UV detector, SHIMADZU, 254 nm) with two in-line YMC-GPC T2000 (20 x 600 mm, particle size: 10  $\mu\text{m}$ ) (preparative columns, YMC). UV-vis spectra were acquired with JASCO V-750 spectrometer. Photoluminescence spectra and quantum yield measurements were conducted with JASCO FP-8500 spectrometer equipped with an integration sphere system. Cyclic voltammograms and differential pulse voltammograms were recorded on ALS Electrochemical Analyzer Model 600E equipped with SVC-3 Voltammetry cell. Counter and working electrodes were made of Pt, and the reference electrode was  $\text{Ag}/\text{Ag}^+$ . The measurements were conducted in MeCN solvent containing tetrabutylammonium hexafluorophosphate as a supporting electrolyte at an indicated scan rate. All the potentials were calibrated with the standard ferrocene/ferrocenium ( $\text{Fc}/\text{Fc}^+$ ) redox couple measured in identical conditions. Microwave irradiation

was conducted with Initiator<sup>+</sup> (Biotage), and the reaction temperature was measured by an internal probe. The crystal measurement was performed with XtaLAB Synergy-S/Cu (Rigaku).

Unless otherwise noted, materials obtained from commercial suppliers were used without further purification. Toluene was dried on a Glass Contour Solvent dispensing system (Nikko Hansen & Co., Ltd.) prior to use. The 1,1-diarylethylene (**1a**) was commercially available from TCI, and others **1b-d** and **1f-j** were prepared from the commercially available corresponding benzophenones by the Wittig reaction with methyltriphenylphosphonium bromide. The **1e** was prepared according to the literature method.<sup>S1</sup> 4-Bromo-3-chloro-*N,N*-diphenylaniline was synthesized from 1-bromo-2-chloro-4-iodobenzene and diphenylamine by the Buchwald-Hartwig amination reaction.<sup>S2</sup> Unless otherwise noted, all reaction were performed under nitrogen atmosphere.

## Experimental Procedures

### 1. Procedures for the synthesis of benzophosphole 2 (Scheme 3)

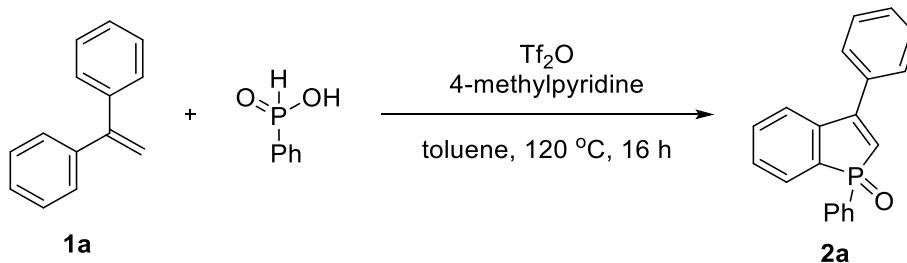

A 0.1 mmol scale reaction of 1a: In a Schlenk tube with pressure resistance, phenylphosphinic acid (0.20 mmol, 28.4 mg) was dissolved in toluene (1.5 mL), and 1,1-diphenylethylene (**1a**, 0.10 mmol, 18.0 mg) and 4-methylpyridine (0.48 mmol, 44.7 mg) were subsequently added under N<sub>2</sub>. Tf<sub>2</sub>O (0.48 mmol, 80  $\mu$ L) was then added, and the mixture was heated at 120 °C in an oil bath for 16 h. After cooling, the resulting mixture was quenched with aqueous HCl (1 M, 1 mL) and extracted with CHCl<sub>3</sub> (3 x 10 mL). The combined organic layer was dried over Na<sub>2</sub>SO<sub>4</sub> and concentrated in vacuo. The residue was purified by flash silica gel column chromatography with hexane/EtOAc (1:2, v/v) to give the desired product **2a** (98%, 29.6 mg).

A 7.3 mmol scale reaction of 1a: In a Schlenk tube with pressure resistance, phenylphosphinic acid (14.6 mmol, 2.073 g) was dissolved in toluene (15 mL), and 1,1-diphenylethylene (**1a**, 7.3 mmol, 1.314 g) and 4-methylpyridine (35.04 mmol, 3.263 g) were subsequently added under N<sub>2</sub>. The tube was cooled to 0 °C with an ice bath, and Tf<sub>2</sub>O (35.04 mmol, 5.8 mL) was added. The mixture was heated at 120 °C in an oil bath for 22 h. After cooling, the resulting mixture was quenched with aqueous HCl (1 M, 10 mL) and extracted with CHCl<sub>3</sub> (3 x 25 mL). The combined organic layer was dried over Na<sub>2</sub>SO<sub>4</sub> and concentrated in vacuo. The residue was purified by silica gel column chromatography with hexane/EtOAc (1:2, v/v) and GPC (CHCl<sub>3</sub>) subsequently to give the desired product **2a** (64%, 1.41 g).

### 2. Procedures for palladium-catalysed C–H arylation of benzophospholes

#### Procedure for the reaction with aryl iodides or bromides (Scheme 4)

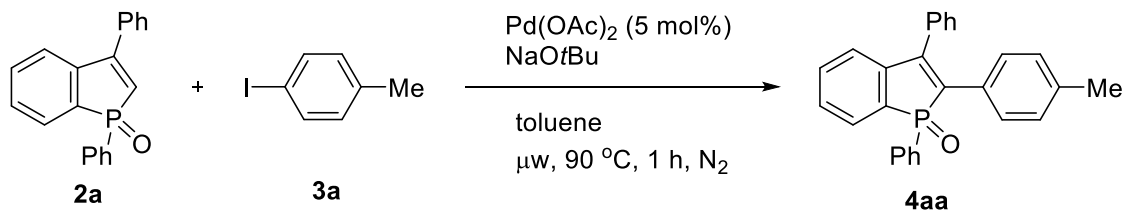

A 0.2 mmol scale reaction of 2a: To a 10 mL microwave vessel were added **2a** (0.20 mmol, 60.4 mg), 4-iodotoluene (**3a**, 0.30 mmol, 65.4 mg), and  $\text{Pd(OAc)}_2$  (0.010 mmol, 2.3 mg). The vessel was moved to a glovebox filled with  $\text{N}_2$ , and  $\text{NaOtBu}$  (0.40 mmol, 38.4 mg) was added. The vessel was sealed and taken out from the glovebox. Toluene (2.0 mL) was then added by syringe, and the reaction mixture was irradiated under microwave reactor conditions at 90 °C for 1 hour. The reaction was allowed to cool to room temperature, and the mixture was filtered through a short plug of activated alumina (EtOAc as eluent) and concentrated in vacuo. The residue was purified by silica gel column chromatography with hexane/ethyl acetate (1:2, v/v) as eluent to give the desired product **4aa** (79%, 61.9 mg).

A 2.0 mmol scale reaction of 2a: To a 30 mL microwave vessel were added **2a** (2.0 mmol, 604.0 mg), 4-iodotoluene (**3a**, 3.0 mmol, 654.0 mg), and  $\text{Pd(OAc)}_2$  (0.10 mmol, 22.5 mg). The vessel was moved to a glovebox filled with  $\text{N}_2$ , and  $\text{NaOtBu}$  (4.0 mmol, 384.0 mg) was added. The vessel was sealed and taken out from the glovebox. Toluene (15 mL) was then added by syringe, and the reaction mixture was irradiated under microwave reactor conditions at 90 °C for 1 hour. The reaction was allowed to cool to room temperature, and the mixture was filtered through a short plug of activated alumina (EtOAc as eluent) and concentrated in vacuo. The residue was purified by silica gel column chromatography with hexane/ethyl acetate (1:2, v/v) as eluent to give the desired product **4aa** (65%, 510.0 mg).

#### Procedure for the reaction with aryl chlorides (Scheme 8a)

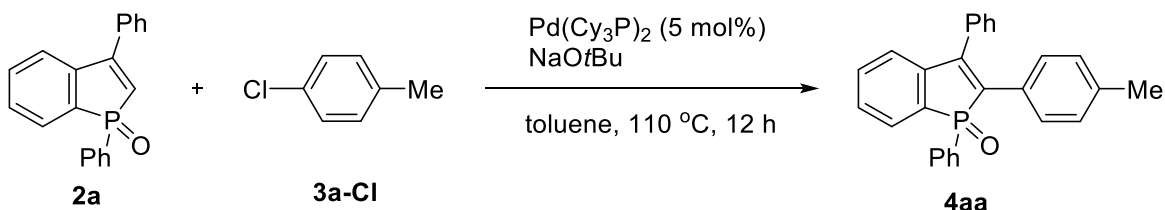

A 0.1 mmol scale reaction of 2a: To a 10 mL microwave vessel were added **2a** (0.10 mmol, 30.2 mg) and 4-chlorotoluene (**3a-Cl**, 0.30 mmol, 38.0 mg). The vessel was moved to a glovebox filled with  $\text{N}_2$ , and  $\text{Pd(Cy}_3\text{P)}_2$  (0.0050 mmol, 3.3 mg) and  $\text{NaOtBu}$  (0.20 mmol, 19.2 mg) were added. The vessel was sealed and taken out from the glovebox. Toluene (1.0 mL) was then added by

syringe, and the reaction mixture was stirred at 110 °C (oil bath) for 12 hour. The reaction was allowed to cool to room temperature, and the mixture was filtered through a short plug of activated alumina (EtOAc as eluent) and concentrated in vacuo. The residue was purified by silica gel column chromatography with hexane/ethyl acetate (1:2, v/v) as eluent to give the desired product **4aa** (69%, 27.1 mg).

### Procedure for the synthesis of **5** (Scheme 8b)

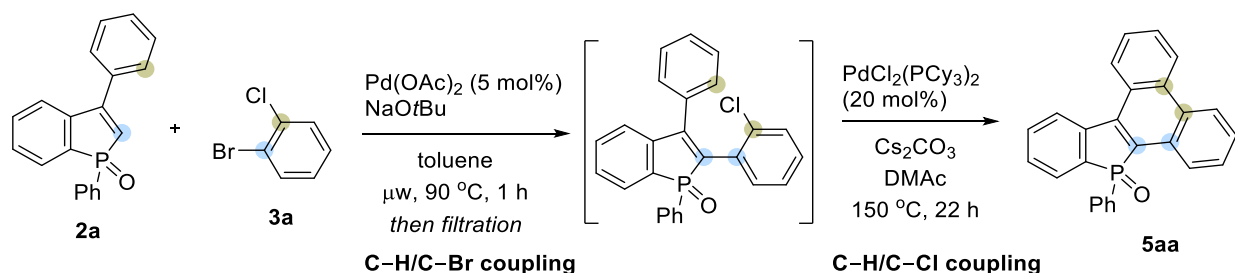

**Synthesis of 5aa:** To a 10 mL microwave vessel were added **2a** (0.20 mmol, 60.4 mg), 1-bromo-2-chlorobenzene (**3**, 0.30 mmol, 57.4 mg), and Pd(OAc)<sub>2</sub> (0.010 mmol, 2.3 mg). The vessel was moved to a glovebox filled with N<sub>2</sub>, and NaOtBu (0.40 mmol, 38.4 mg) was added. The vessel was sealed and taken out from the glovebox. Toluene (2.0 mL) was then added by syringe, and the reaction mixture was irradiated under microwave reactor conditions at 90 °C for 1 hour. The reaction was allowed to cool to room temperature, and the mixture was filtered through a short plug of activated alumina (EtOAc as eluent) and concentrated in vacuo. The residue was transferred to a 20 mL two-neck round-bottom flask, and PdCl<sub>2</sub>(PCy<sub>3</sub>)<sub>2</sub> (0.040 mmol, 29.6 mg), Cs<sub>2</sub>CO<sub>3</sub> (0.4 mmol, 130.4 mg), and DMAc (1.0 mL) were added. The mixture was stirred at 150 °C (oil bath) for 22 hour under N<sub>2</sub>. The resulting mixture was then quenched with brine and extracted with ethyl acetate (3 x 10 mL). The combined organic layer was dried over sodium sulfate. Concentration in vacuo followed by silica gel column purification with hexane/ethyl acetate (1:1, v/v) gave the desired product **5aa** (75%, 56.3 mg).

## Detailed Optimization Studies

**Table S1.** Optimization Studies for the Synthesis of Starting Benzophosphole **2a** from 1,1-Diphenylethylene **1a** and Phenylphosphinic Acid<sup>a</sup>

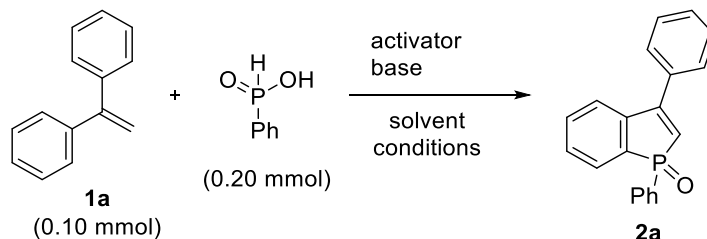

| Entry     | Activator (mmol)              | Base (mmol)                           | Solvent           | Conditions          | Yield of <b>2a</b> (%) <sup>b</sup> |
|-----------|-------------------------------|---------------------------------------|-------------------|---------------------|-------------------------------------|
| 1         | Tf <sub>2</sub> O (0.48)      | DMAP (0.48)                           | DCE               | 120 °C, 16 h        | (69)                                |
| 2         | Tf <sub>2</sub> O (0.48)      | DMAP (0.48)                           | DCE               | 90 °C, 16 h         | trace                               |
| 3         | PhNTf <sub>2</sub> (0.48)     | DMAP (0.48)                           | DCE               | 120 °C, 16 h        | n.d.                                |
| 4         | TfOH (0.96)                   | none                                  | DCE               | 120 °C, 16 h        | n.d.                                |
| <hr/>     |                               |                                       |                   |                     |                                     |
| 5         | Tf <sub>2</sub> O (0.48)      | 2,6-lutidine (0.48)                   | DCE               | 120 °C, 16 h        | 1                                   |
| 6         | Tf <sub>2</sub> O (0.48)      | 4-methylpyridine (0.48)               | DCE               | 120 °C, 16 h        | 76                                  |
| 7         | Tf <sub>2</sub> O (0.48)      | pyridine (0.48)                       | DCE               | 120 °C, 16 h        | 60                                  |
| 8         | Tf <sub>2</sub> O (0.48)      | Et <sub>3</sub> N (0.48)              | DCE               | 120 °C, 16 h        | 1                                   |
| 9         | Tf <sub>2</sub> O (0.48)      | K <sub>2</sub> CO <sub>3</sub> (0.48) | DCE               | 120 °C, 16 h        | 21                                  |
| 10        | Tf <sub>2</sub> O (0.48)      | none                                  | DCE               | 120 °C, 16 h        | n.d.                                |
| <hr/>     |                               |                                       |                   |                     |                                     |
| <b>11</b> | <b>Tf<sub>2</sub>O (0.48)</b> | <b>4-methylpyridine (0.48)</b>        | <b>toluene</b>    | <b>120 °C, 16 h</b> | <b>92(98)</b>                       |
| 12        | Tf <sub>2</sub> O (0.48)      | 4-methylpyridine (0.48)               | toluene           | 110 °C, 16 h        | 81                                  |
| 13        | Tf <sub>2</sub> O (0.48)      | 4-methylpyridine (0.48)               | PhCF <sub>3</sub> | 120 °C, 16 h        | 78                                  |
| 14        | Tf <sub>2</sub> O (0.48)      | 4-methylpyridine (0.48)               | dioxane           | 120 °C, 16 h        | n.d.                                |
| 15        | Tf <sub>2</sub> O (0.48)      | 4-methylpyridine (0.48)               | HFIP              | 120 °C, 16 h        | 1                                   |

<sup>a</sup>Reaction conditions: **1a** (0.10 mmol), phenylphosphinic acid (0.20 mmol), activator (0.48 mmol), base (0.48 mmol), solvent (1.5 mL), N<sub>2</sub>. <sup>b</sup>Determined by <sup>31</sup>P NMR using triethylphosphate as an internal standard. Isolated yield is in parentheses.

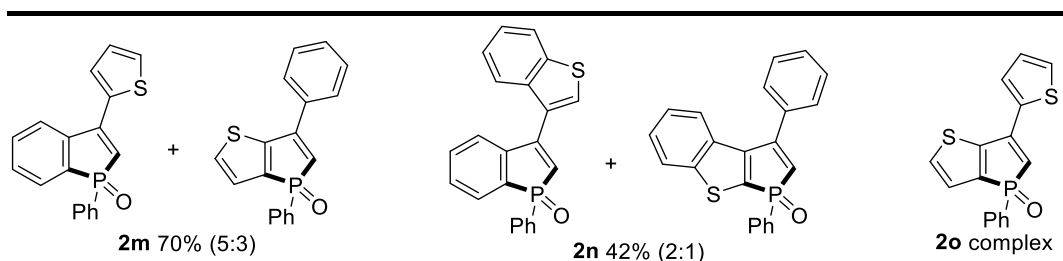

**Scheme S1** Unsuccessful heterocyclic systems in starting material preparation.

**Table S2.** Optimization Studies for Palladium-Catalysed C–H Arylation of Benzophosphole **2a** with 4-Iodotoluene **3a**<sup>a</sup>

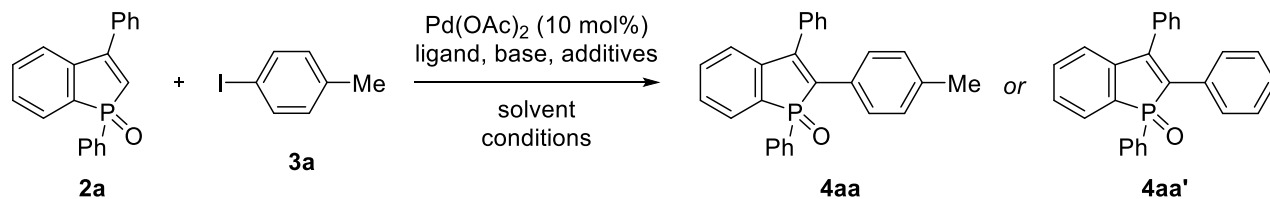

| Entry           | Ligand (mol%)            | Base (equiv)                          | Additives (equiv) | Solvent (mL)            | Conditions   | Yield of <b>4aa</b> or <b>4aa'</b> (%) <sup>b</sup> |
|-----------------|--------------------------|---------------------------------------|-------------------|-------------------------|--------------|-----------------------------------------------------|
| 1               |                          | NaOtBu (2.0)                          |                   | toluene (1.5)           | 90 °C, 16 h  | 66                                                  |
| 2               |                          | NaOtBu (2.0)                          |                   | toluene (1.5)           | 110 °C, 16 h | 32                                                  |
| 3 <sup>c</sup>  |                          | NaOtBu (2.0)                          |                   | toluene (1.5)           | 90 °C, 22 h  | 60(66)                                              |
| 4 <sup>c</sup>  |                          | NaOtBu (2.0)                          |                   | toluene (1.5)           | 90 °C, 11 h  | 42                                                  |
| 5 <sup>c</sup>  |                          | NaOtBu (2.0)                          |                   | toluene (1.5)           | 80 °C, 22 h  | 55                                                  |
| 6 <sup>d</sup>  |                          | NaOtBu (2.0)                          |                   | toluene (1.5)           | 90 °C, 16 h  | n.d.                                                |
| 7               | SPhos (20)               | NaOtBu (2.0)                          |                   | toluene (1.5)           | 90 °C, 16 h  | 21                                                  |
| 8               | XPhos (20)               | NaOtBu (2.0)                          |                   | toluene (1.5)           | 90 °C, 16 h  | 19                                                  |
| 9               | PPh <sub>2</sub> Cy (20) | NaOtBu (2.0)                          |                   | toluene (1.5)           | 90 °C, 16 h  | 56                                                  |
| 10              | PPh <sub>3</sub> (20)    | NaOtBu (2.0)                          |                   | toluene (1.5)           | 90 °C, 16 h  | 39                                                  |
| 11 <sup>e</sup> |                          | NaOtBu (2.0)                          |                   | toluene (1.5)           | 90 °C, 16 h  | 49                                                  |
| 12 <sup>f</sup> |                          | NaOtBu (2.0)                          |                   | toluene (1.5)           | 110 °C, 16 h | 0                                                   |
| 13 <sup>g</sup> |                          | NaOtBu (2.0)                          |                   | toluene (1.5)           | 90 °C, 16 h  | trace                                               |
| 14              |                          | KOtBu (2.0)                           |                   | toluene (1.5)           | 90 °C, 16 h  | 68                                                  |
| 15              |                          | LiOtBu (2.0)                          |                   | toluene (1.5)           | 110 °C, 16 h | 21                                                  |
| 16              |                          | LiOtBu (2.0)                          |                   | DMF (1.5)               | 90 °C, 18 h  | 13                                                  |
| 17              |                          | NaOtAmyl (2.0)                        |                   | toluene (1.5)           | 90 °C, 16 h  | 28                                                  |
| 18              |                          | Cs <sub>2</sub> CO <sub>3</sub> (2.0) |                   | toluene (1.5)           | 110 °C, 16 h | 0                                                   |
| 19              |                          | NaOtBu (1.5)                          |                   | toluene (1.5)           | 90 °C, 16 h  | 39                                                  |
| 20              |                          | NaOtBu (1.0)                          |                   | toluene (1.5)           | 110 °C, 16 h | 23                                                  |
| 21              |                          | NaOtBu (1.5)                          | DIPEA (1.0)       | toluene (1.5)           | 90 °C, 16 h  | 43                                                  |
| 22              |                          | NaOtBu (1.5)                          | DIPEA (1.0)       | toluene (1.5)           | 100 °C, 11 h | 46                                                  |
| 23              |                          | NaOtBu (2.0)                          |                   | mesitylene (1.5)        | 90 °C, 16 h  | 44                                                  |
| 24              |                          | NaOtBu (2.0)                          |                   | <i>o</i> -xylene (1.5)  | 90 °C, 16 h  | 61                                                  |
| 25              |                          | NaOtBu (2.0)                          |                   | benzene (1.5)           | 90 °C, 16 h  | 58                                                  |
| 26 <sup>c</sup> |                          | NaOtBu (2.0)                          |                   | PhCF <sub>3</sub> (1.5) | 90 °C, 18 h  | 61                                                  |
| 27 <sup>c</sup> |                          | NaOtBu (2.0)                          |                   | MeCN (1.5)              | 90 °C, 16 h  | complex                                             |
| 28 <sup>c</sup> |                          | NaOtBu (2.0)                          |                   | octane (1.5)            | 90 °C, 16 h  | 9                                                   |



|                       |                     |                                       |                      |                       |               |
|-----------------------|---------------------|---------------------------------------|----------------------|-----------------------|---------------|
| 29                    | NaOtBu (2.0)        | LiCl (1.0)                            | toluene (1.5)        | 90 °C, 16 h           | 67            |
| 30                    | NaOtBu (2.0)        | TBAI (1.0)                            | toluene (1.5)        | 90 °C, 16 h           | 59            |
| 31                    | NaOtBu (2.0)        | TBAB (1.0)                            | toluene (1.5)        | 90 °C, 16 h           | 22            |
| 32                    | NaOtBu (2.0)        | Ag <sub>2</sub> CO <sub>3</sub> (0.5) | toluene (1.5)        | 90 °C, 12 h           | 42            |
| 33                    | NaOtBu (1.5)        | Ag <sub>2</sub> CO <sub>3</sub> (0.5) | toluene (1.5)        | 90 °C, 18 h           | 32            |
| 34                    | NaOtBu (2.0)        | AgOAc (1.0)                           | toluene (1.5)        | 90 °C, 12 h           | 54            |
| 35                    | NaOtBu (2.0)        | AgTFA (1.0)                           | toluene (1.5)        | 90 °C, 16 h           | 46            |
| 36                    | NaOtBu (2.0)        | Cu(OAc) <sub>2</sub> (2.0)            | toluene (1.5)        | 90 °C, 16 h           | 43            |
| 37                    | NaOtBu (2.0)        | CuOAc (2.0)                           | toluene (1.5)        | 90 °C, 16 h           | 51            |
| 38                    | NaOtBu (2.0)        |                                       | toluene (2.0)        | 90 °C, 16 h           | 73(76)        |
| 39                    | NaOtBu (2.0)        |                                       | toluene (2.0)        | 100 °C, 8 h           | 70            |
| 40                    | NaOtBu (2.0)        |                                       | toluene (3.0)        | 90 °C, 16 h           | 43            |
| 41                    | NaOtBu (2.0)        |                                       | toluene (2.0)        | μw, 100 °C, 2 h       | 71            |
| 42                    | NaOtBu (2.0)        |                                       | toluene (1.5)        | μw, 100 °C, 1 h       | 78            |
| 43                    | NaOtBu (2.0)        |                                       | toluene (1.5)        | μw, 90 °C, 2 h        | 78            |
| 44                    | NaOtBu (2.0)        |                                       | toluene (1.5)        | μw, 80 °C, 2 h        | 35            |
| 45                    | NaOtBu (2.0)        |                                       | toluene (1.5)        | μw, 90 °C, 1 h        | 72            |
| 46                    | NaOtBu (2.0)        |                                       | toluene (1.0)        | μw, 90 °C, 1 h        | 83            |
| 47                    | NaOtBu (2.0)        |                                       | toluene (0.5)        | μw, 90 °C, 1 h        | 76            |
| <b>48<sup>h</sup></b> | <b>NaOtBu (2.0)</b> |                                       | <b>toluene (2.0)</b> | <b>μw, 90 °C, 1 h</b> | <b>81(79)</b> |
| 49 <sup>e</sup>       | NaOtBu (2.0)        |                                       | toluene (1.0)        | μw, 90 °C, 1 h        | 74            |
| 50 <sup>i</sup>       | NaOtBu (2.0)        |                                       | toluene (1.0)        | μw, 90 °C, 1 h        | n.d.          |
| 51 <sup>j</sup>       | NaOtBu (2.0)        |                                       | toluene (1.0)        | μw, 90 °C, 1 h        | trace         |

<sup>a</sup>Reaction conditions: Pd(OAc)<sub>2</sub> (0.010 mmol), **2a** (0.10 mmol), **3a** (0.15 mmol), solvent (1.5 mL), N<sub>2</sub>. <sup>b</sup>Determined by <sup>1</sup>H NMR using triethylphosphate as an internal standard. Isolated yields are in parentheses. <sup>c</sup>With 0.20 mmol of **2a**. <sup>d</sup>Without Pd(OAc)<sub>2</sub>. <sup>e</sup>4-Bromotoluene was used instead of **3a**. <sup>f</sup>PhOTf was used instead of **3a**. The targeted product was **4aa'**. <sup>g</sup>Ph<sub>2</sub>IOTf was used instead of **3a**. The targeted product was **4aa'**. <sup>h</sup>On a 0.20 mmol scale with Pd(OAc)<sub>2</sub> (0.010 mmol, 5 mol %). <sup>i</sup>PhOTs was used instead of **3a**. The targeted product was **4aa'**. <sup>j</sup>4-Chlorotoluene was used instead of **3a**.

**Table S3.** Optimization Studies for Palladium-Catalysed C–H Arylation of Benzophosphole **2a** with 4-Chlorotoluene **3a-Cl**<sup>a</sup>

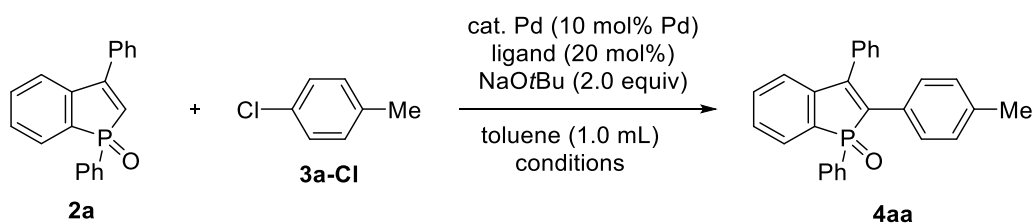

| Entry                    | Cat. Pd                                               | Ligand (20 mol%)                   | Conditions          | Yield of <b>4aa</b> (%) <sup>b</sup> |
|--------------------------|-------------------------------------------------------|------------------------------------|---------------------|--------------------------------------|
| 1                        | Pd <sub>2</sub> (dba) <sub>3</sub>                    | XPhos                              | μw, 100 °C, 1 h     | 15                                   |
| 2                        | Pd <sub>2</sub> (dba) <sub>3</sub>                    | XPhos                              | μw, 140 °C, 1 h     | 11                                   |
| 3                        | Pd <sub>2</sub> (dba) <sub>3</sub>                    |                                    | μw, 100 °C, 1 h     | trace                                |
| 4 <sup>c</sup>           | PdCl <sub>2</sub> (Cy <sub>3</sub> P) <sub>2</sub>    |                                    | μw, 110 °C, 1 h     | 11                                   |
| <b>5</b>                 | <b>Pd<sub>2</sub>(dba)<sub>3</sub></b>                | <b>XPhos</b>                       | <b>110 °C, 12 h</b> | <b>45</b>                            |
| 6 <sup>d</sup>           | Pd <sub>2</sub> (dba) <sub>3</sub>                    | XPhos                              | 90 °C, 20 h         | 42                                   |
| 7                        | Pd <sub>2</sub> (dba) <sub>3</sub>                    | XPhos                              | 70 °C, 16 h         | 33                                   |
| 8                        | Pd <sub>2</sub> (dba) <sub>3</sub>                    | PCy <sub>3</sub> H·BF <sub>4</sub> | 90 °C, 16 h         | complex                              |
| 9                        | Pd <sub>2</sub> (dba) <sub>3</sub>                    | PCy <sub>3</sub>                   | 100 °C, 16 h        | 32                                   |
| 10                       | Pd(OAc) <sub>2</sub>                                  | XPhos                              | 110 °C, 12 h        | 6                                    |
| 11                       | Pd(OAc) <sub>2</sub>                                  | SPhos                              | 110 °C, 12 h        | complex                              |
| 12 <sup>c</sup>          | XPhos Pd G4                                           |                                    | 110 °C, 6 h         | 16                                   |
| 13 <sup>c</sup>          | XPhos Pd G4                                           |                                    | 110 °C, 18 h        | 14                                   |
| 14 <sup>c, e</sup>       | XPhos Pd G4                                           |                                    | 110 °C, 10 h        | 24                                   |
| 15 <sup>c</sup>          | RuPhos Pd G3                                          |                                    | 110 °C, 10 h        | trace                                |
| 16                       | CpPd(π-allyl)                                         | XPhos                              | 110 °C, 17 h        | n.d.                                 |
| 17                       | (cod)Pd(CH <sub>2</sub> TMS) <sub>2</sub>             | XPhos                              | 110 °C, 17 h        | n.d.                                 |
| 18                       | Pd <sub>2</sub> (dba) <sub>3</sub> ·CHCl <sub>3</sub> | XPhos                              | 110 °C, 12 h        | n.d.                                 |
| 19 <sup>c, d</sup>       | Pd( <i>t</i> Bu <sub>3</sub> P) <sub>2</sub>          |                                    | 100 °C, 15 h        | 51                                   |
| 20 <sup>c, d</sup>       | Pd(Cy <sub>3</sub> P) <sub>2</sub>                    |                                    | 100 °C, 15 h        | 62                                   |
| 21 <sup>c, d</sup>       | Pd(Ph <sub>3</sub> P) <sub>4</sub>                    |                                    | 100 °C, 15 h        | n.d.                                 |
| 22 <sup>c, d</sup>       | Pd(Cy <sub>3</sub> P) <sub>2</sub>                    |                                    | μw, 100 °C, 1 h     | 33                                   |
| <b>23<sup>c, d</sup></b> | <b>Pd(Cy<sub>3</sub>P)<sub>2</sub></b>                |                                    | <b>110 °C, 12 h</b> | <b>69(69)</b>                        |
| 24 <sup>f</sup>          | Pd(Cy <sub>3</sub> P) <sub>2</sub>                    |                                    | 110 °C, 12 h        | 40                                   |
| 25 <sup>g</sup>          | Pd(Cy <sub>3</sub> P) <sub>2</sub>                    |                                    | 110 °C, 12 h        | 11                                   |

<sup>a</sup>Reaction conditions: Pd catalyst (0.010 mmol, based on Pd), **2a** (0.10 mmol), **3a-Cl** (0.15 mmol), solvent (1.0 mL), N<sub>2</sub>. <sup>b</sup>Determined by <sup>1</sup>H NMR using triethylphosphate as an internal standard. Isolated yield is in parentheses. <sup>c</sup>With 5 mol % Pd loading. <sup>d</sup>With 0.30 mmol of **3a-Cl**. <sup>e</sup>Dioxane

(1.0 mL) was used instead of toluene. <sup>f</sup>With 0.30 mmol of 4-iodotoluene. <sup>g</sup>With 0.30 mmol of 4-bromotoluene.

## Hammett Studies

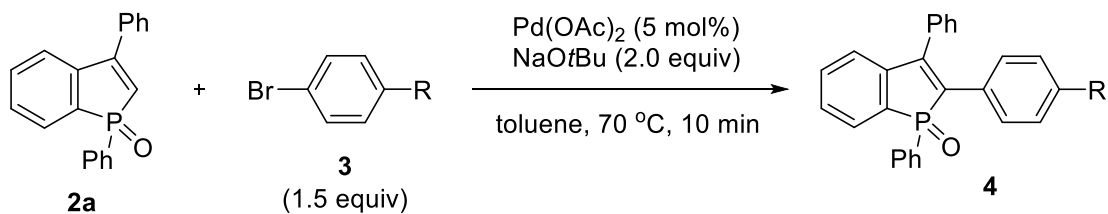

Yields of **4** (NMR)

R = OPh: 6%    R = OMe: 9%    R = Me: 13%    R = H: 15%  
R = F: 7%    R = Cl: 6%    R = CF<sub>3</sub>: 2%

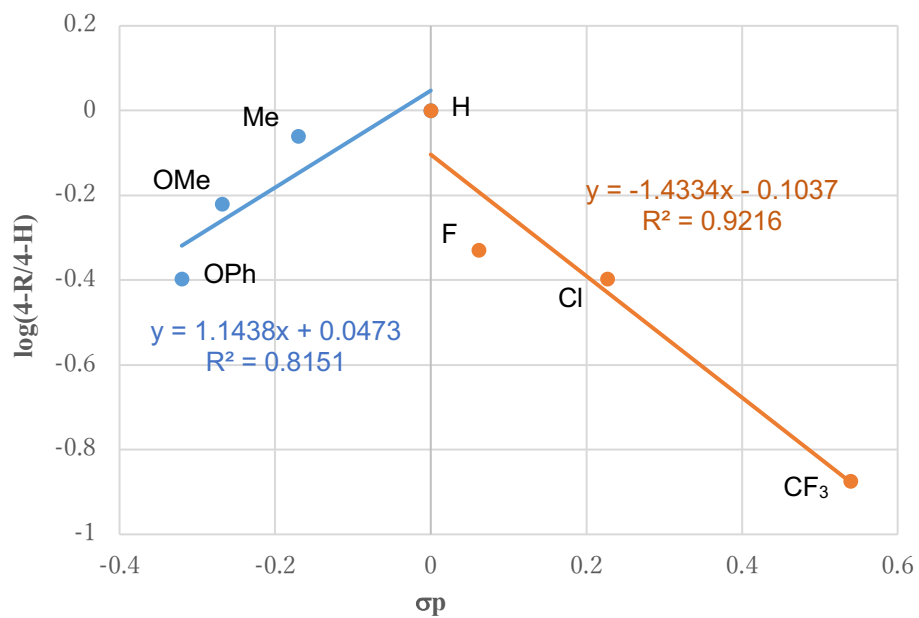

**Figure S1.** Hammett plot with *para*-substituted aryl bromides **3**.

## Cyclic Voltammetry and Differential Pulse Voltammetry

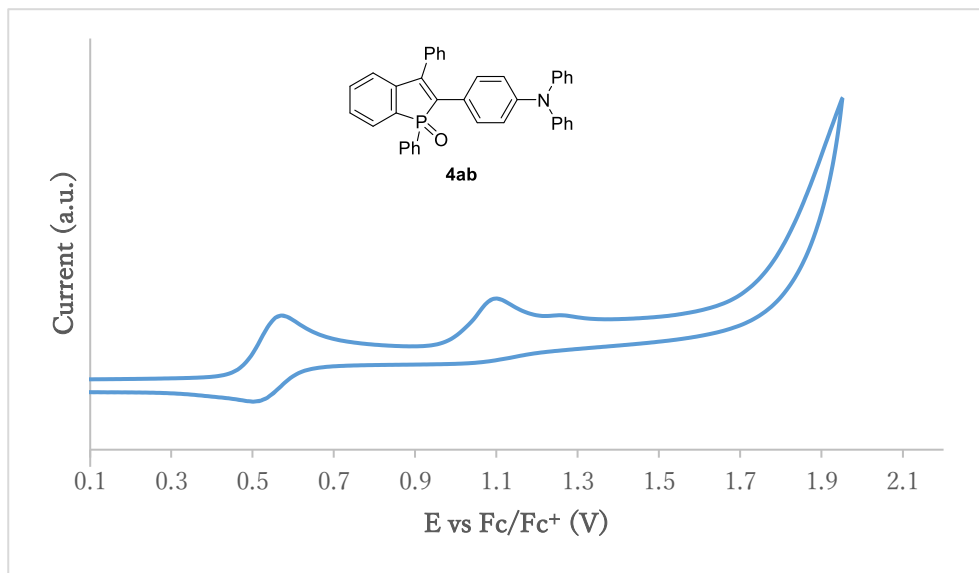

**Figure S2.** Cyclic voltammograms of **4ab** in MeCN containing 0.1 M n-Bu<sub>4</sub>NPF<sub>6</sub> at a scan rate of 0.05 V/s.

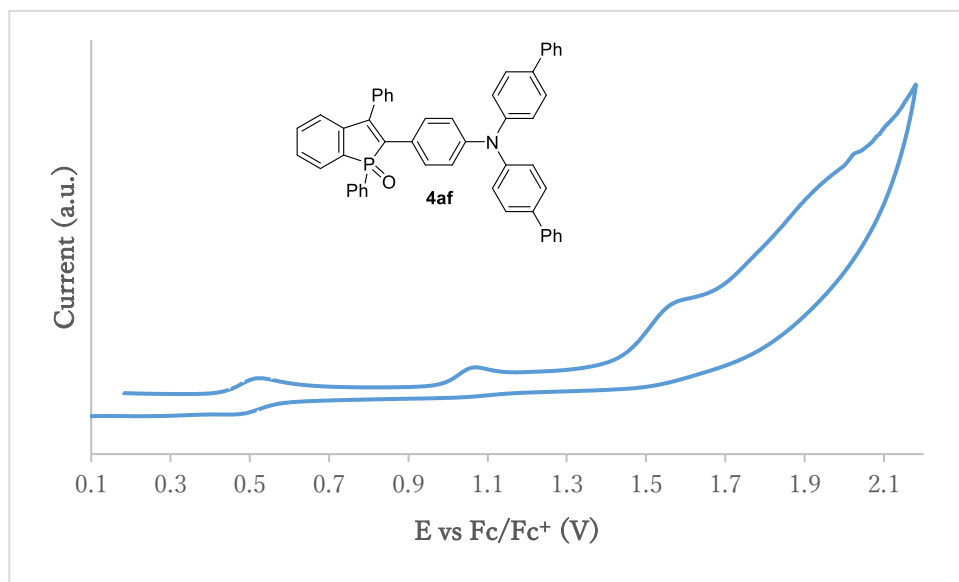

**Figure S3.** Cyclic voltammograms of **4af** in MeCN containing 0.1 M n-Bu<sub>4</sub>NPF<sub>6</sub> at a scan rate of 0.05 V/s.

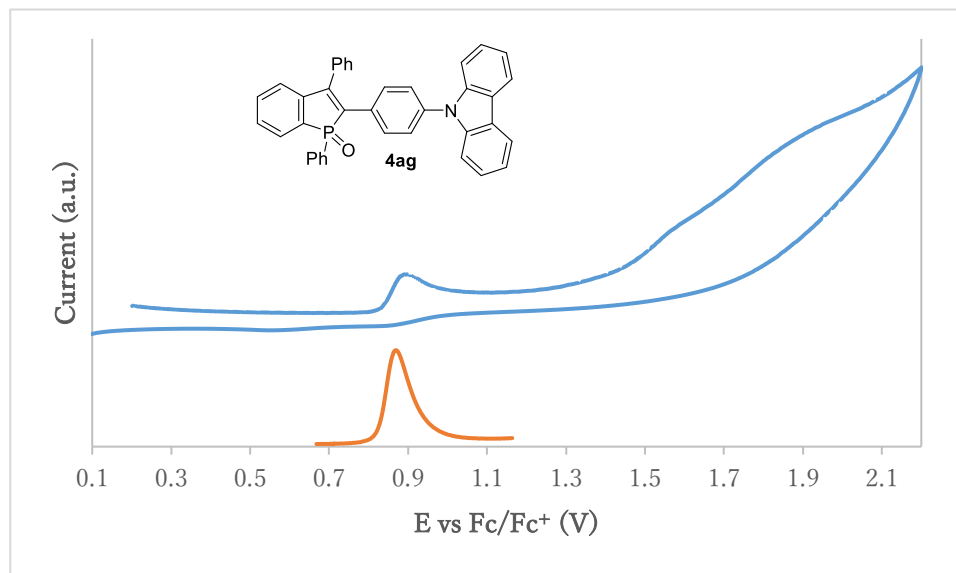

**Figure S4.** Cyclic voltammograms (blue line) and differential pulse voltammograms (orange line) of **4ag** in MeCN containing 0.1 M  $n\text{-Bu}_4\text{NPF}_6$  at a scan rate of 0.1 V/s.

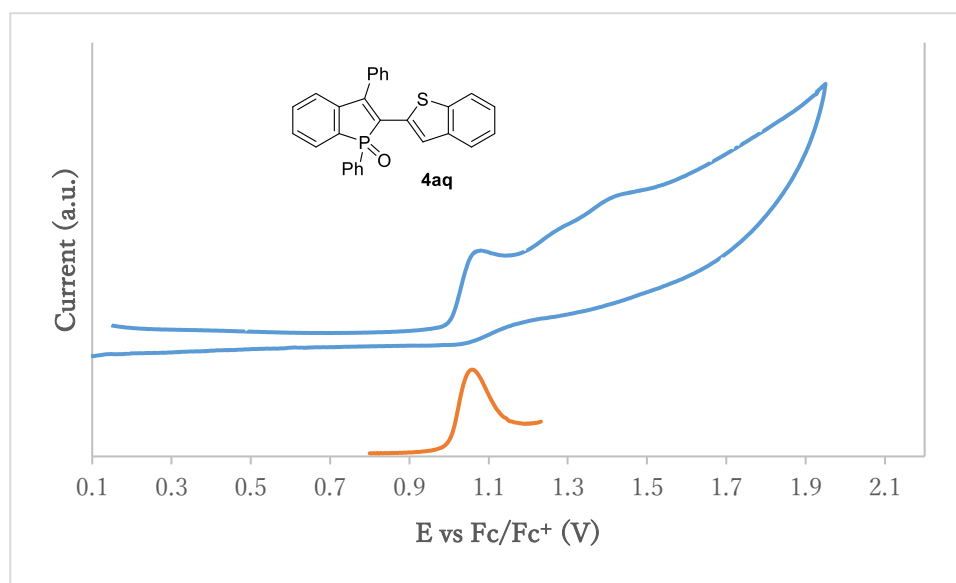

**Figure S5.** Cyclic voltammograms (blue line) and differential pulse voltammograms (orange line) of **4aq** in MeCN containing 0.1 M  $n\text{-Bu}_4\text{NPF}_6$  at a scan rate of 0.05 V/s.

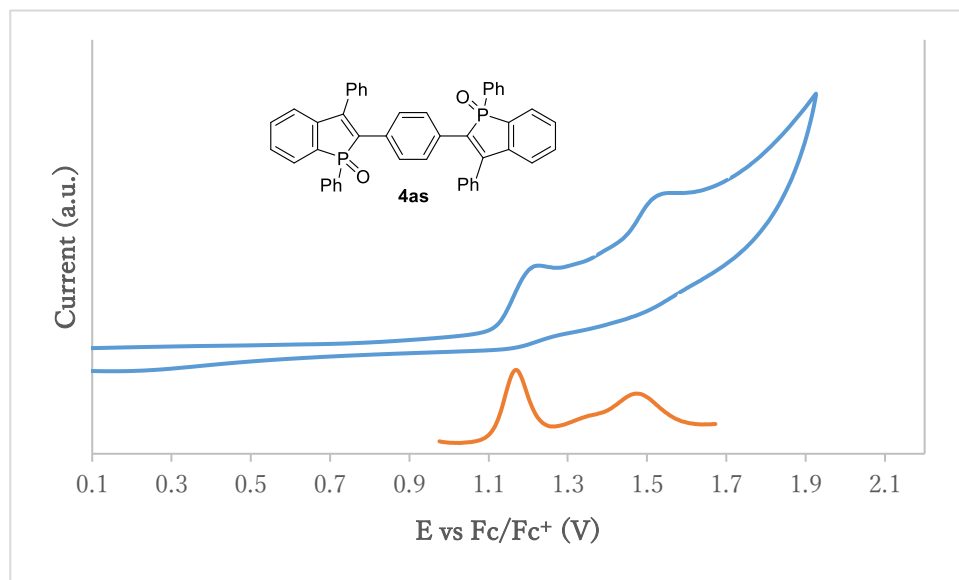

**Figure S6.** Cyclic voltammograms (blue line) and differential pulse voltammograms (orange line) of **4as** in MeCN containing 0.1 M n-Bu<sub>4</sub>NPF<sub>6</sub> at a scan rate of 0.05 V/s.

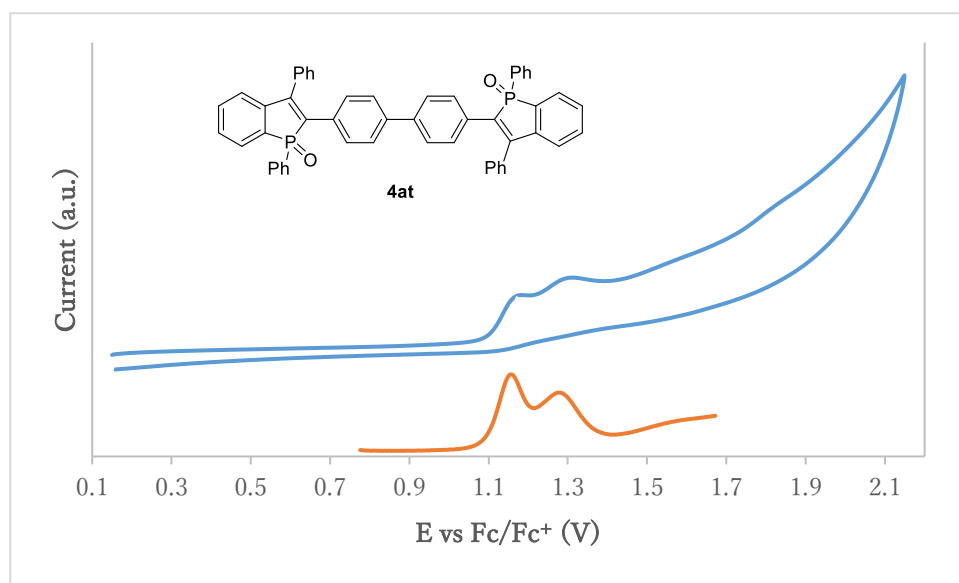

**Figure S7.** Cyclic voltammograms (blue line) and differential pulse voltammograms (orange line) of **4at** in MeCN containing 0.1 M n-Bu<sub>4</sub>NPF<sub>6</sub> at a scan rate of 0.03 V/s.

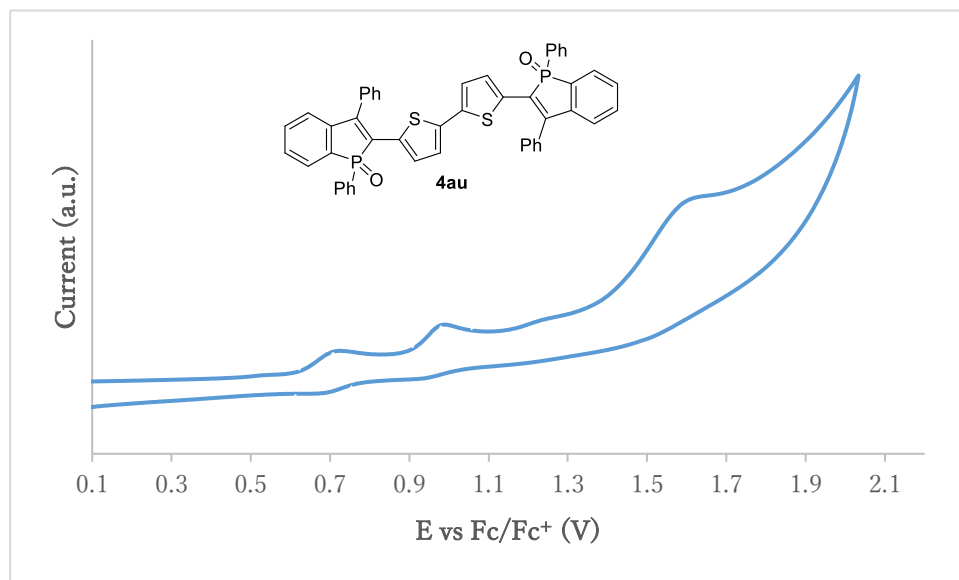

**Figure S8.** Cyclic voltammograms of **4au** in MeCN containing 0.1 M  $n\text{-Bu}_4\text{NPF}_6$  at a scan rate of 0.05 V/s.

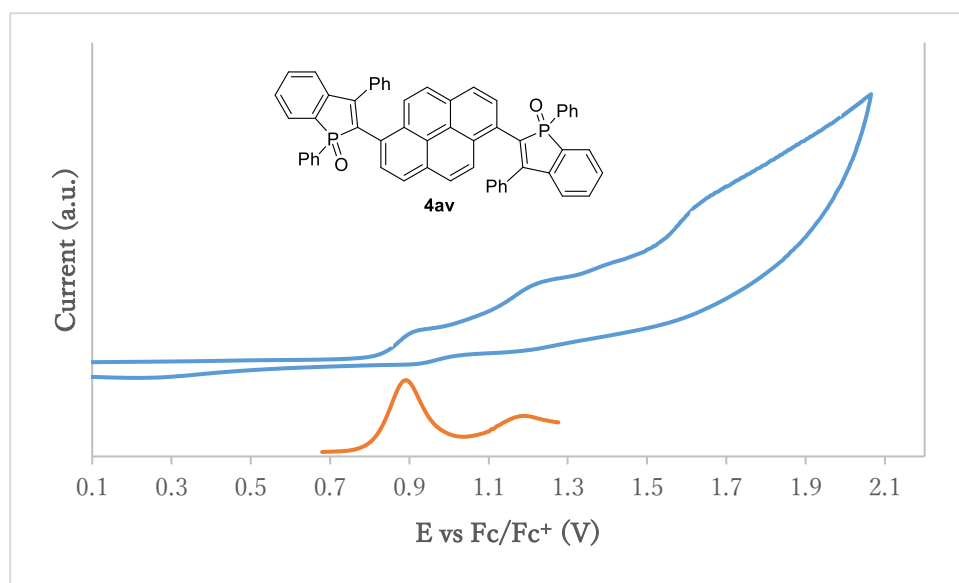

**Figure S9.** Cyclic voltammograms (blue line) and differential pulse voltammograms (orange line) of **4av** in MeCN containing 0.1 M  $n\text{-Bu}_4\text{NPF}_6$  at a scan rate of 0.05 V/s.



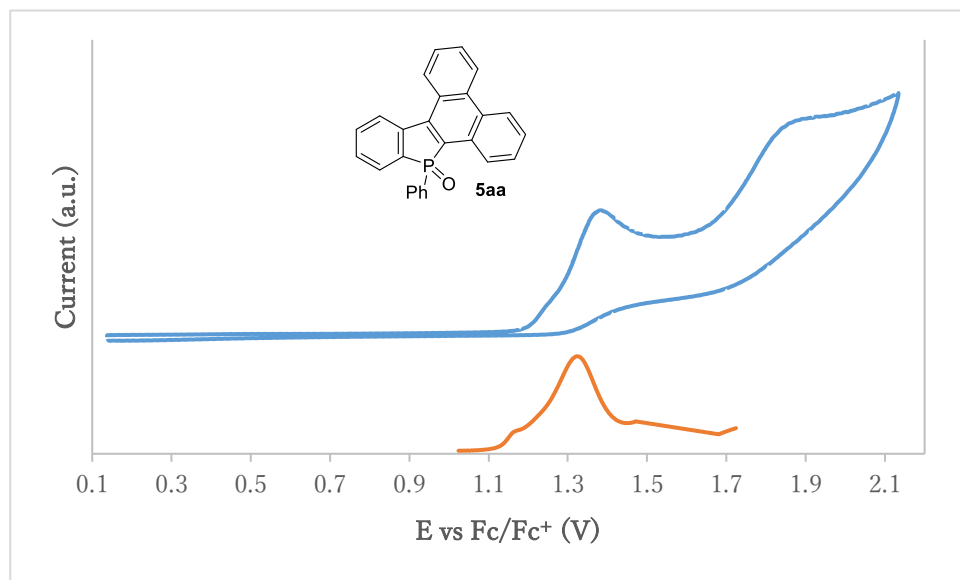

**Figure S10.** Cyclic voltammograms (blue line) and differential pulse voltammograms (orange line) of **5aa** in MeCN containing 0.1 M n-Bu<sub>4</sub>NPF<sub>6</sub> at a scan rate of 0.05 V/s.

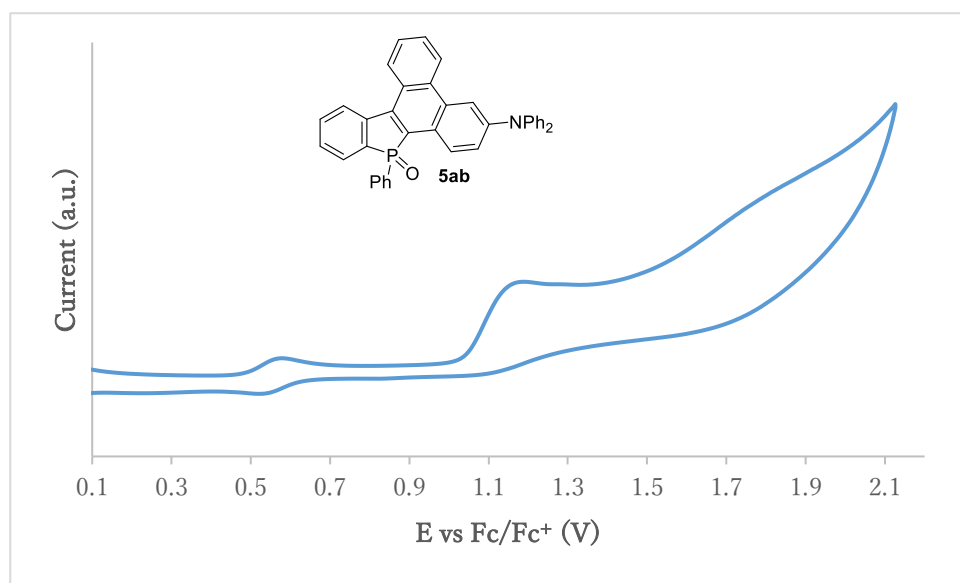

**Figure S11.** Cyclic voltammograms of **5ab** in MeCN containing 0.1 M n-Bu<sub>4</sub>NPF<sub>6</sub> at a scan rate of 0.03 V/s.

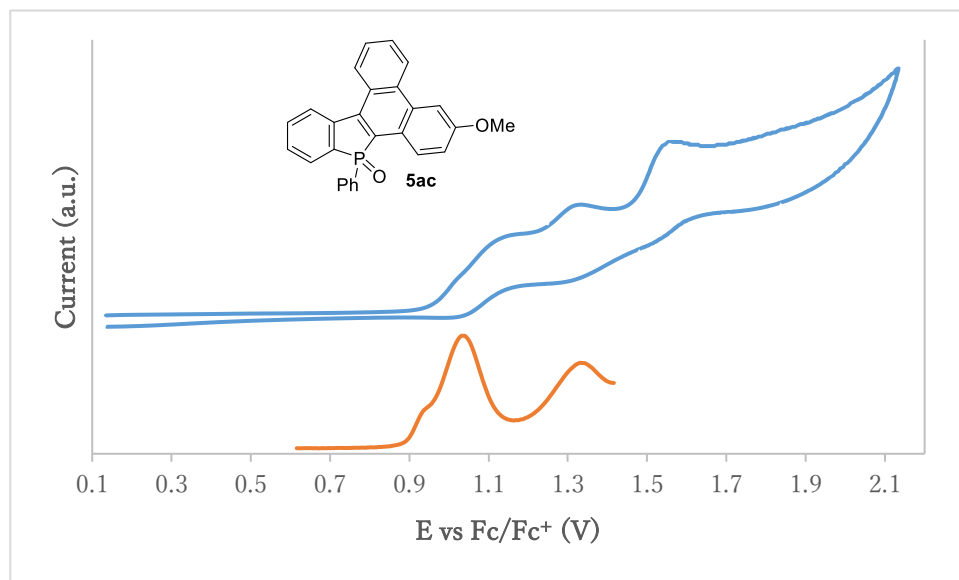

**Figure S12.** Cyclic voltammograms (blue line) and differential pulse voltammograms (orange line) of **5ac** in MeCN containing 0.1 M n-Bu<sub>4</sub>NPF<sub>6</sub> at a scan rate of 0.03 V/s.

## Absorption and Fluorescence Spectra

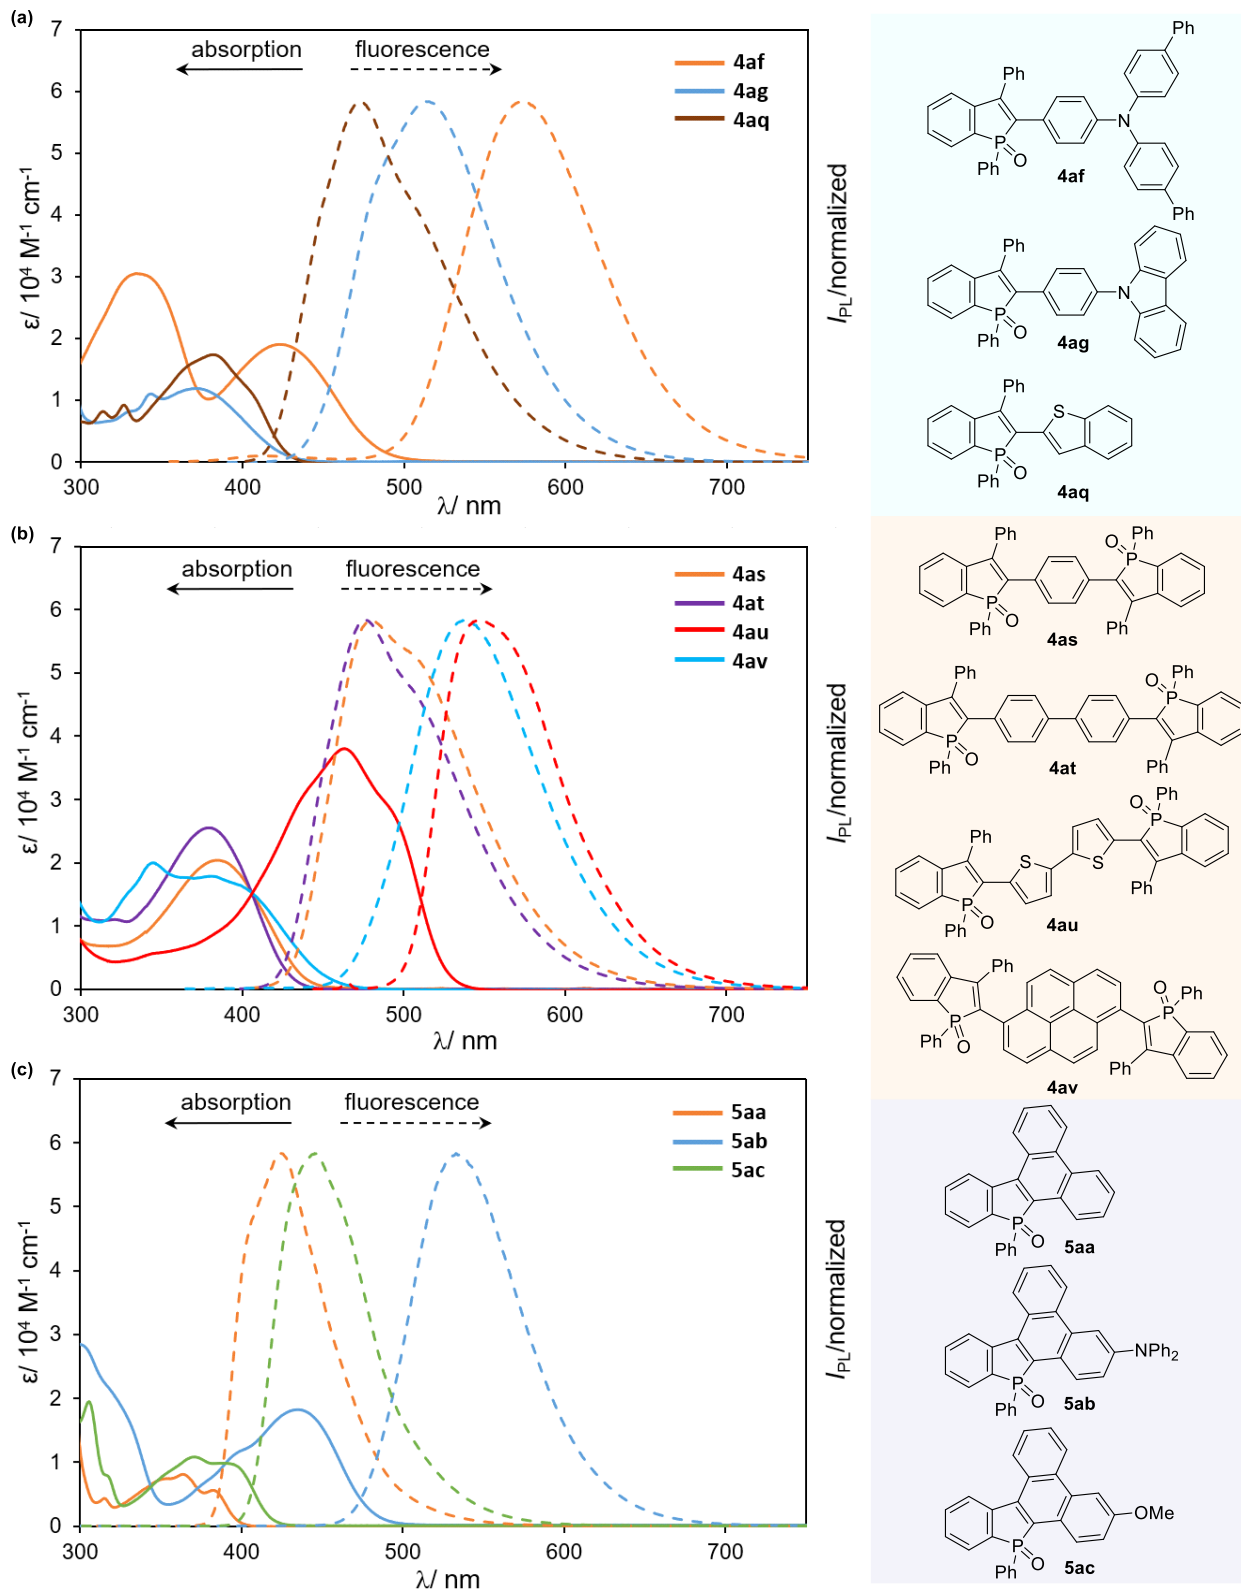

**Figure S13.** UV-vis absorption (solid line) and fluorescence spectra (dashed line; excited at the absorption maxima) of (a) **4af-ag**, and **4aq**, (b) **4as-av**, and **5aa-ac** in  $\text{CH}_2\text{Cl}_2$  ( $c = 10^{-5} \text{ M}$ ).

## Theoretical Calculations

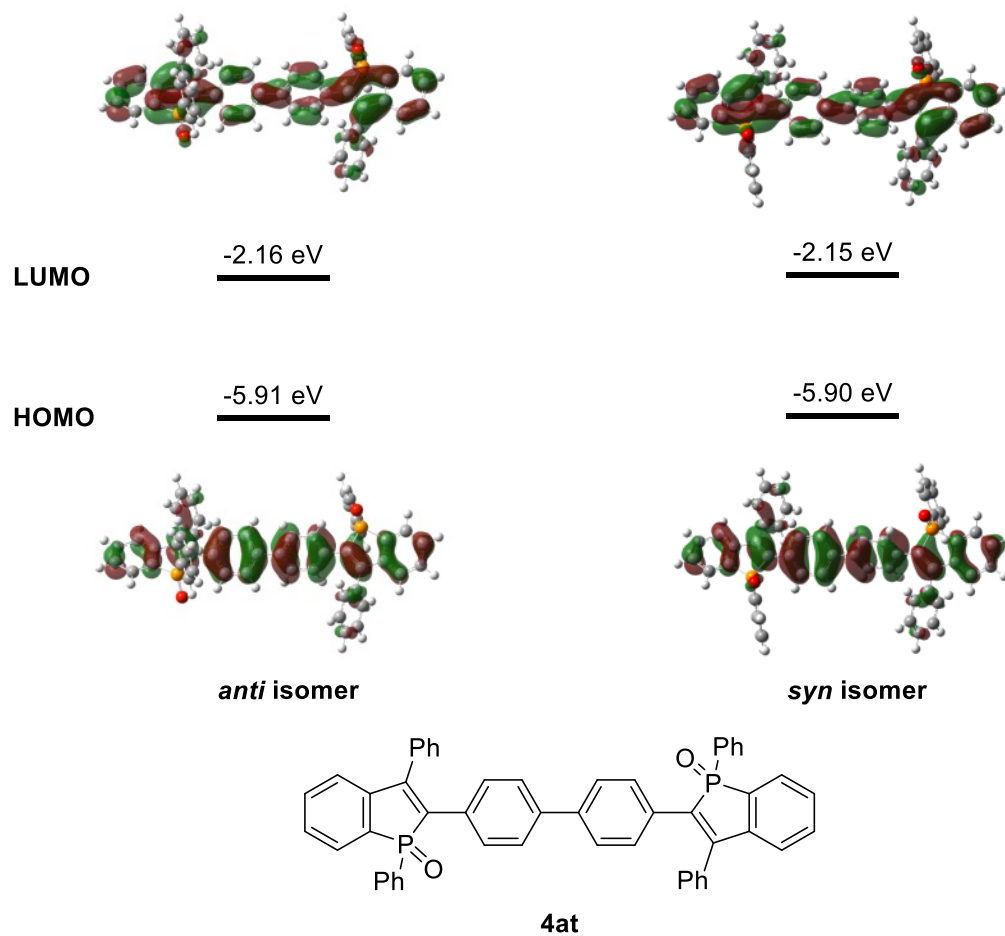

**Figure S14.** Kohn-Sham molecular orbitals of **4at** calculated at the PBE0/6-31 +G(d) level of theory, implemented in the Gaussian 16 program.

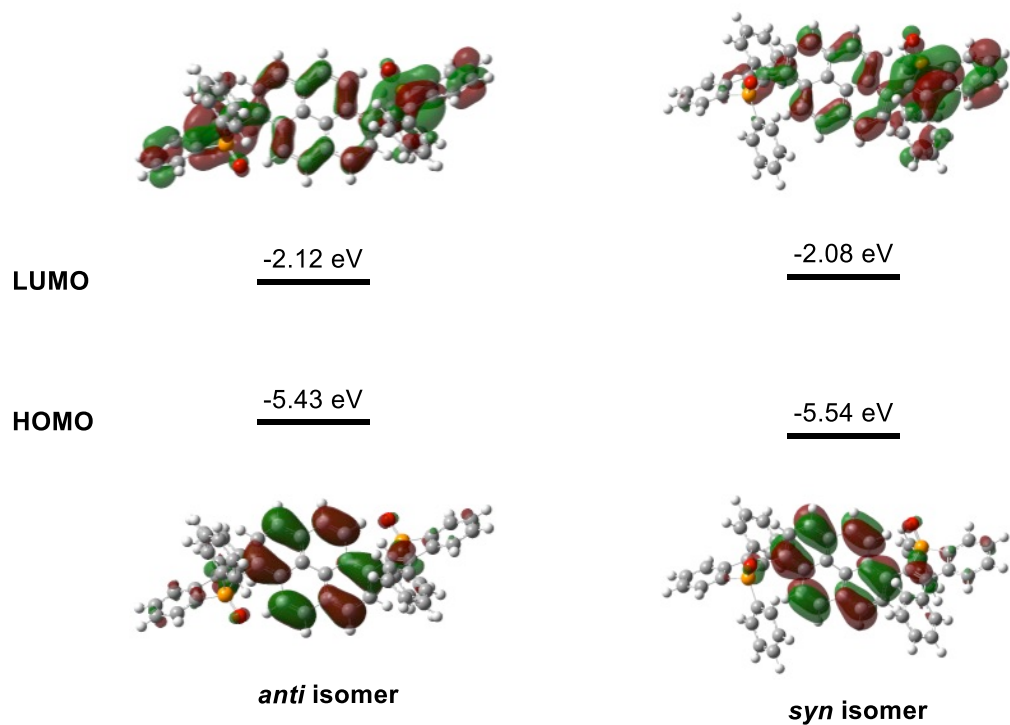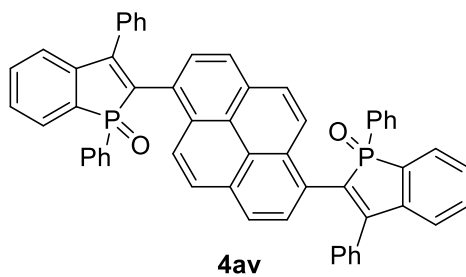

**Figure S15.** Kohn-Sham molecular orbitals of **4av** calculated at the PBE0/6-31 +G(d) level of theory, implemented in the Gaussian 16 program.

## X-Ray Analysis

The single crystals of **2b** suitable for X-ray analysis were grown from CHCl<sub>3</sub>/hexane. The structure was refined by full-matrix least-squares method using SHELXL-2017/1.

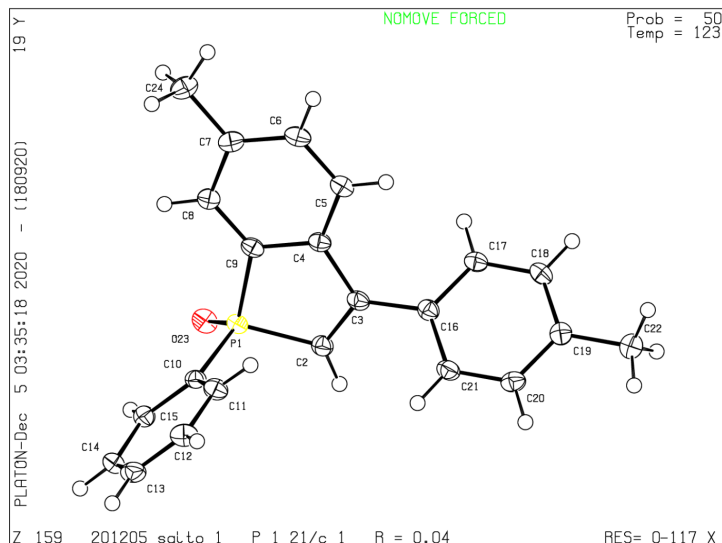

**Figure S16.** ORTEP drawing of **2b** (CCDC 2174057, 50% thermal probability).

**Table S4.** Crystal Data for **2b**

|                               |            |
|-------------------------------|------------|
| Crystal system                | monoclinic |
| Space group IT number         | 14         |
| Space group name H-M alt      | P 1 21/c 1 |
| Space group name Hall         | -P 2ybc    |
| Cell length a                 | 12.5743(3) |
| Cell length b                 | 11.3680(2) |
| Cell length c                 | 11.7601(2) |
| Cell angle alpha              | 90         |
| Cell angle beta               | 93.369(2)  |
| Cell angle gamma              | 90         |
| Cell volume                   | 1678.14(6) |
| Cell formula units Z          | 4          |
| Refine ls R factor all        | 0.0435     |
| Refine ls R factor gt         | 0.0403     |
| Refine ls wR factor gt        | 0.1064     |
| Refine ls wR factor ref       | 0.1094     |
| Refine ls goodness of fit ref | 1.064      |

The single crystals of **4av** suitable for X-ray analysis were grown from CHCl<sub>3</sub>/EtOAc/hexane. The structure was refined by full-matrix least-squares method using SHELXL-2017/1.

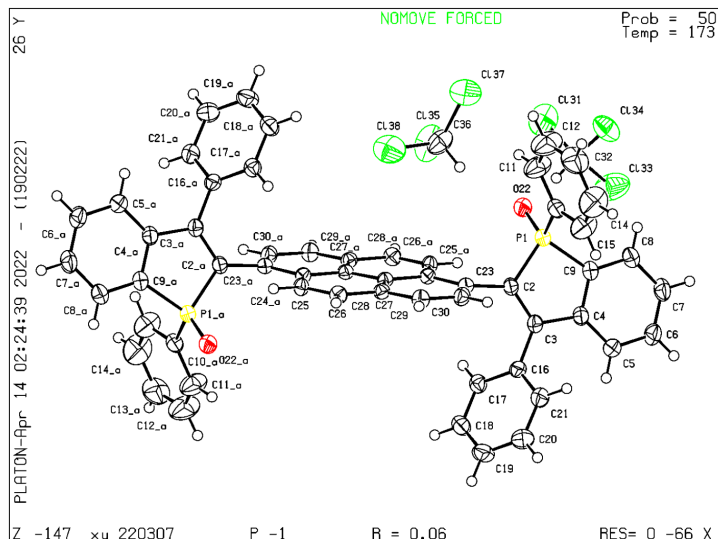

**Figure S17.** ORTEP drawing of **4av** (CCDC 2166424, 50% thermal probability).

**Table S5.** Crystal Data for **4av**

|                               |            |
|-------------------------------|------------|
| Crystal system                | triclinic  |
| Space group IT number         | 2          |
| Space group name H-M alt      | P -1       |
| Space group name Hall         | -P 1       |
| Cell length a                 | 10.0941(3) |
| Cell length b                 | 10.4249(3) |
| Cell length c                 | 15.3161(3) |
| Cell angle alpha              | 73.955(2)  |
| Cell angle beta               | 87.469(2)  |
| Cell angle gamma              | 73.633(3)  |
| Cell volume                   | 1485.17(7) |
| Cell formula units Z          | 2          |
| Refine ls R factor all        | 0.0877     |
| Refine ls R factor gt         | 0.0633     |
| Refine ls wR factor gt        | 0.1680     |
| Refine ls wR factor ref       | 0.1847     |
| Refine ls goodness of fit ref | 1.113      |

## Characterization Data for Substrates and Products

The characterization data for **2a** is consistent with that reported in our previous work.<sup>S3</sup>

<sup>1</sup>H, <sup>13</sup>C{<sup>1</sup>H}, <sup>19</sup>F{<sup>1</sup>H}, and <sup>31</sup>P{<sup>1</sup>H} NMR spectra for all compounds are attached in the last part.

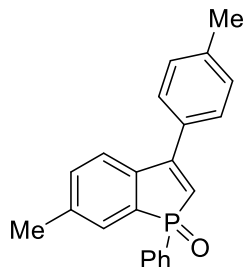

**6-Methyl-1-phenyl-3-(*p*-tolyl)phosphindole 1-oxide (2b)** : Purified by flash chromatography with hexane/ethyl acetate (1/2, v/v): 28 mg (85%, 0.10 mmol scale); pale yellow solid; m.p. 157.6 – 158.7 °C; <sup>1</sup>H NMR (CDCl<sub>3</sub>, 400 MHz): δ 7.82-7.76 (m, 2H), 7.55-7.42 (m, 6H), 7.37 (dd, *J* = 3.0, 7.8 Hz, 1H), 7.30 (d, *J* = 7.9 Hz, 2H), 7.27 (d, *J* = 10.4 Hz, 1H), 6.26 (d, *J* = 24.2 Hz, 1H), 2.43 (s, 3H), 2.36 (s, 3H); <sup>13</sup>C{<sup>1</sup>H} NMR (CDCl<sub>3</sub>, 100 MHz): δ 158.3 (d, <sup>2</sup>*J*<sub>CP</sub> = 15.4 Hz, 1C), 140.0 (d, <sup>3</sup>*J*<sub>CP</sub> = 10.5 Hz, 1C), 139.8 (1C), 139.7 (d, <sup>2</sup>*J*<sub>CP</sub> = 27.0 Hz, 1C), 134.4 (d, <sup>1</sup>*J*<sub>CP</sub> = 104.1 Hz, 1C), 133.0 (1C), 132.5 (d, <sup>3</sup>*J*<sub>CP</sub> = 16.4 Hz, 1C), 132.3 (d, <sup>4</sup>*J*<sub>CP</sub> = 2.8 Hz, 1C), 131.1 (d, <sup>2</sup>*J*<sub>CP</sub> = 10.8 Hz, 2C), 130.2 (d, <sup>2</sup>*J*<sub>CP</sub> = 9.8 Hz, 1C), 130.1 (d, <sup>1</sup>*J*<sub>CP</sub> = 101.4 Hz, 1C), 129.6 (2C), 128.9 (d, <sup>3</sup>*J*<sub>CP</sub> = 12.4 Hz, 2C), 127.9 (2C), 124.0 (d, <sup>3</sup>*J*<sub>CP</sub> = 11.9 Hz, 1C), 121.3 (d, <sup>1</sup>*J*<sub>CP</sub> = 99.9 Hz, 1C), 21.6 (1C), 21.4 (1C); <sup>31</sup>P{<sup>1</sup>H} NMR (CDCl<sub>3</sub>, 162 MHz): δ 36.92; HRMS (APCI) *m/z* (M+H)<sup>+</sup> calcd for C<sub>22</sub>H<sub>20</sub>OP: 331.1246, found: 331.1224.

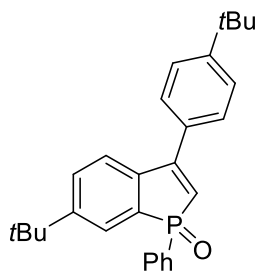

**6-(*tert*-Butyl)-3-(4-(*tert*-butyl)phenyl)-1-phenylphosphindole 1-oxide (2c)** : Purified by flash chromatography with hexane/ethyl acetate (1/2, v/v): 29 mg (70%, 0.10 mmol scale); pale yellow solid; m.p. 180.4 – 181.6 °C; <sup>1</sup>H NMR (CDCl<sub>3</sub>, 400 MHz): δ 7.82-7.72 (m, 3H), 7.52-7.49 (m, 6H), 7.47-7.42 (m, 3H), 6.29 (d, *J* = 24.2 Hz, 1H), 1.38 (s, 9H), 1.30 (s, 9H); <sup>13</sup>C{<sup>1</sup>H} NMR (CDCl<sub>3</sub>, 100 MHz): δ 157.9 (d, <sup>2</sup>*J*<sub>CP</sub> = 15.3 Hz, 1C), 153.3 (d, <sup>3</sup>*J*<sub>CP</sub> = 9.7 Hz, 1C), 153.0 (1C), 139.7 (d, <sup>2</sup>*J*<sub>CP</sub> = 27.6 Hz, 1C), 134.1 (d, <sup>1</sup>*J*<sub>CP</sub> = 104.3 Hz, 1C), 132.4 (d, <sup>3</sup>*J*<sub>CP</sub> = 16.1 Hz, 1C), 132.2 (d, <sup>4</sup>*J*<sub>CP</sub> = 2.6 Hz, 1C), 131.2 (d, <sup>2</sup>*J*<sub>CP</sub> = 10.8 Hz, 2C), 130.2 (d, <sup>1</sup>*J*<sub>CP</sub> = 101.9 Hz, 1C), 129.5 (1C), 128.9 (d, <sup>3</sup>*J*<sub>CP</sub> = 12.3 Hz, 2C), 127.8 (2C), 126.6 (d, <sup>2</sup>*J*<sub>CP</sub> = 10.1 Hz, 1C), 125.8 (2C), 124.0 (d, <sup>3</sup>*J*<sub>CP</sub> = 11.9 Hz, 1C), 121.9 (d, <sup>1</sup>*J*<sub>CP</sub> = 100.7 Hz, 1C), 35.2 (1C), 35.0 (1C), 31.4-31.3 (overlapped, 6C); <sup>31</sup>P{<sup>1</sup>H} NMR (CDCl<sub>3</sub>, 162 MHz): δ 37.31; HRMS (APCI) *m/z* (M+H)<sup>+</sup> calcd for C<sub>28</sub>H<sub>32</sub>OP: 415.2185, found: 415.2205.



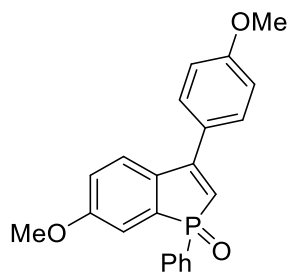

**6-Methoxy-3-(4-methoxyphenyl)-1-phenylphosphindole 1-oxide (2d)** : Purified by flash chromatography with hexane/ethyl acetate (1/2, v/v): 14 mg (40%, 0.10 mmol scale); pale yellow solid; m.p. 61.6 – 62.7 °C;  $^1\text{H}$  NMR ( $\text{CDCl}_3$ , 400 MHz):  $\delta$  7.81-7.76 (m, 2H), 7.54-7.51 (m, 3H), 7.47-7.41 (m, 3H), 7.22 (dd,  $J = 2.5, 11.0$  Hz, 1H), 7.02-7.00 (m, 2H), 6.95 (dd,  $J = 2.5, 8.5$  Hz, 1H), 6.16 (d,  $J = 24.5$  Hz, 1H), 3.88 (s, 3H), 3.81 (s, 3H);  $^{13}\text{C}\{^1\text{H}\}$  NMR ( $\text{CDCl}_3$ , 100 MHz):  $\delta$  161.1 (d,  $^3J_{\text{CP}} = 13.6$  Hz, 1C), 160.8 (1C), 158.0 (d,  $^2J_{\text{CP}} = 15.2$  Hz, 1C), 136.5 (d,  $^1J_{\text{CP}} = 103.0$  Hz, 1C), 134.7 (d,  $^2J_{\text{CP}} = 26.9$  Hz, 1C), 132.3 (d,  $^4J_{\text{CP}} = 2.8$  Hz, 1C), 131.1 (d,  $^2J_{\text{CP}} = 10.8$  Hz, 2C), 130.1 (d,  $^1J_{\text{CP}} = 102.2$  Hz, 1C), 129.4 (2C), 129.0 (d,  $^3J_{\text{CP}} = 12.4$  Hz, 2C), 127.8 (d,  $^3J_{\text{CP}} = 17.0$  Hz, 1C), 125.4 (d,  $^3J_{\text{CP}} = 13.2$  Hz, 1C), 119.2 (d,  $^1J_{\text{CP}} = 101.6$  Hz, 1C), 117.4 (d,  $^4J_{\text{CP}} = 1.6$  Hz, 1C), 115.2 (d,  $^2J_{\text{CP}} = 10.9$  Hz, 1C), 114.3 (2C), 55.8 (1C), 55.6 (1C);  $^{31}\text{P}\{^1\text{H}\}$  NMR ( $\text{CDCl}_3$ , 162 MHz):  $\delta$  36.59; HRMS (APCI)  $m/z$  (M+H) $^+$  calcd for  $\text{C}_{22}\text{H}_{20}\text{O}_3\text{P}$ : 363.1145, found:363.1115.

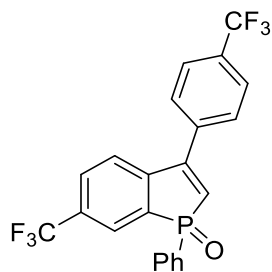

**1-Phenyl-6-(trifluoromethyl)-3-(4-(trifluoromethyl)phenyl)phosphindole 1-oxide (2e)**: colorless solid (0.1 mmol scale, 17.9 mg, 41% yield; 1.0 mmol scale, 113.9 mg, 26% yield); m.p. 142.8-143.7 °C (from hexane); TLC  $R_f$  0.25 (hexane/EtOAc, 1:3).  $^1\text{H}$  NMR ( $\text{CDCl}_3$ , 400 MHz)  $\delta$  7.95 (dd,  $J = 9.5, 0.5$  Hz, 1H), 7.84-7.78 (m, 5H), 7.69 (d,  $J = 8.0$  Hz, 2H), 7.64-7.59 (m, 1H), 7.56-7.49 (m, 3H), 6.61 (d,  $J = 23.5$  Hz, 1H).  $^{13}\text{C}\{^1\text{H}\}$  NMR ( $\text{CDCl}_3$ , 100 MHz)  $\delta$  155.5 (d,  $^2J_{\text{CP}} = 14.3$  Hz, 1C), 142.1, 144.6 (d,  $^2J_{\text{CP}} = 27.1$  Hz, 1C), 137.8 (d,  $^3J_{\text{CP}} = 16.0$  Hz, 1C), 135.6, 134.5, 133.0 (d,  $^4J_{\text{CP}} = 2.8$  Hz, 1C), 132.5, 132.4, 132.2, 132.1, 131.8, 131.7, 131.5, 131.4, 130.9 (d,  $^2J_{\text{CP}} = 11.0$  Hz, 2C), 130.19, 130.18, 130.16, 129.2 (d,  $^3J_{\text{CP}} = 12.6$  Hz, 2C), 128.2, 128.1, 127.8, 127.5, 127.1, 126.5, 126.34, 126.31, 126.27, 126.23, 126.19, 126.17, 126.13, 126.10, 126.0, 125.1, 124.8, 124.79, 123.9 (d,  $^3J_{\text{CP}} = 11.0$  Hz, 1C), 122.3, 122.09, 122.07, 119.7, 119.4 (All observed signals are just shown because of complexity associated with C–F and C–P couplings.);  $^{19}\text{F}\{^1\text{H}\}$  NMR ( $\text{CDCl}_3$ , 376 MHz)  $\delta$  -62.7, -62.8.  $^{31}\text{P}\{^1\text{H}\}$

NMR (CDCl<sub>3</sub>, 162 MHz)  $\delta$  35.8; HRMS (APCI)  $m/z$  ([M+H]<sup>+</sup>) Calcd for C<sub>22</sub>H<sub>14</sub>F<sub>6</sub>OP: 439.0681, Found: 439.0667.

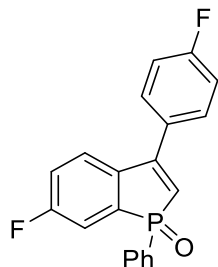

**6-Fluoro-3-(4-fluorophenyl)-1-phenylphosphindole 1-oxide (2f)** : Purified by flash chromatography with hexane/ethyl acetate (1/2, v/v): 26 mg (78%, 0.10 mmol scale); pale yellow solid; m.p. 51.6 – 53.0 °C; <sup>1</sup>H NMR (CDCl<sub>3</sub>, 400 MHz):  $\delta$  7.80-7.74 (m, 2H), 7.59-7.50 (m, 3H), 7.49-7.44 (m, 2H), 7.42-7.35 (m, 2H), 7.23-7.14 (m, 3H), 6.33 (d,  $J$  = 24.1 Hz, 1H); <sup>13</sup>C{<sup>1</sup>H} NMR (CDCl<sub>3</sub>, 100 MHz):  $\delta$  163.9 (dd, <sup>3</sup> $J_{CP}/^1J_{CF}$  = 15.2, 252.3 Hz, 1C), 163.7 (d, <sup>1</sup> $J_{CF}$  = 248.7 Hz, 1C), 156.6 (d, <sup>2</sup> $J_{CP}$  = 14.5 Hz, 1C), 137.8 (dd, <sup>4</sup> $J_{CF}/^2J_{CP}$  = 3.0, 26.4 Hz, 1C), 137.1 (dd, <sup>3</sup> $J_{CF}/^1J_{CP}$  = 7.0, 103.1 Hz, 1C), 132.8 (d, <sup>4</sup> $J_{CP}$  = 2.8 Hz, 1C), 131.0 (d, <sup>2</sup> $J_{CP}$  = 10.9 Hz, 2C), 130.9 (dd, <sup>4</sup> $J_{CF}/^3J_{CP}$  = 3.5, 16.8 Hz, 1C), 129.8 (d, <sup>3</sup> $J_{CF}$  = 8.6 Hz, 2C), 129.2 (d, <sup>3</sup> $J_{CP}$  = 12.5 Hz, 2C), 128.9 (d, <sup>1</sup> $J_{CP}$  = 103.6 Hz, 1C), 125.6 (dd, <sup>3</sup> $J_{CF}/^3J_{CP}$  = 7.9, 13.1 Hz, 1C), 122.8 (dd, <sup>5</sup> $J_{CF}/^1J_{CP}$  = 3.7, 100.0 Hz, 1C), 119.2 (dd, <sup>4</sup> $J_{CP}/^2J_{CF}$  = 1.2, 22.5 Hz, 1C), 117.3 (dd, <sup>2</sup> $J_{CP}/^2J_{CF}$  = 10.7, 23.7 Hz, 1C), 116.2 (d, <sup>2</sup> $J_{CF}$  = 21.7 Hz, 2C); <sup>19</sup>F{<sup>1</sup>H} NMR (376 MHz, CDCl<sub>3</sub>)  $\delta$  -110.3 (d,  $J$  = 5.4 Hz), -110.5; <sup>31</sup>P{<sup>1</sup>H} NMR (CDCl<sub>3</sub>, 162 MHz):  $\delta$  35.44 (d,  $J$  = 4.6 Hz); HRMS (APCI)  $m/z$  (M+H)<sup>+</sup> calcd for C<sub>20</sub>H<sub>14</sub>F<sub>2</sub>OP: 339.0745, found: 339.0763.

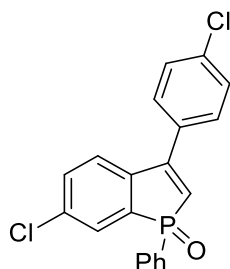

**6-Chloro-3-(4-chlorophenyl)-1-phenylphosphindole 1-oxide (2g)** : Purified by flash chromatography with hexane/ethyl acetate (1/2, v/v): 21 mg (55%, 0.10 mmol scale); pale yellow solid; m.p. 75.6 – 76.7 °C; <sup>1</sup>H NMR (CDCl<sub>3</sub>, 400 MHz):  $\delta$  7.79-7.74 (m, 2H), 7.63 (dd,  $J$  = 1.7, 9.9 Hz, 1H), 7.60-7.55 (m, 1H), 7.50-7.45 (m, 7H), 7.34 (dd,  $J$  = 3.2, 8.2 Hz, 1H), 6.37 (d,  $J$  = 23.9 Hz, 1H); <sup>13</sup>C{<sup>1</sup>H} NMR (CDCl<sub>3</sub>, 100 MHz):  $\delta$  156.4 (d, <sup>2</sup> $J_{CP}$  = 14.6 Hz, 1C), 140.1 (d, <sup>2</sup> $J_{CP}$  = 26.7 Hz, 1C), 136.5 (d, <sup>3</sup> $J_{CP}$  = 13.9 Hz, 1C), 136.3 (d, <sup>1</sup> $J_{CP}$  = 102.3 Hz, 1C), 136.1 (1C), 133.1 (d, <sup>3</sup> $J_{CP}$  = 16.5 Hz, 1C), 132.9 (d, <sup>4</sup> $J_{CP}$  = 2.8 Hz, 1C), 132.7 (d, <sup>4</sup> $J_{CP}$  = 1.4 Hz, 1C), 131.0 (d, <sup>2</sup> $J_{CP}$  = 10.8 Hz, 2C), 129.8 (d, <sup>2</sup> $J_{CP}$  = 10.5 Hz, 1C), 129.4 (2C), 129.23 (d, <sup>3</sup> $J_{CP}$  = 12.5 Hz, 2C), 129.23 (2C), 128.6 (d, <sup>1</sup> $J_{CP}$  = 103.9 Hz, 1C), 125.0 (d, <sup>3</sup> $J_{CP}$  = 12.2 Hz, 1C), 123.6 (d, <sup>1</sup> $J_{CP}$  = 98.9 Hz, 1C); <sup>31</sup>P{<sup>1</sup>H} NMR (CDCl<sub>3</sub>,

162 MHz):  $\delta$  35.84; HRMS (APCI)  $m/z$  (M+H)<sup>+</sup> calcd for C<sub>20</sub>H<sub>14</sub>Cl<sub>2</sub>OP: 371.0154, found: 371.0142.

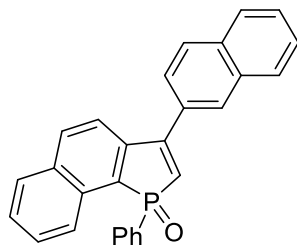

**3-(Naphthalen-2-yl)-1-phenylbenzo[g]phosphindole 1-oxide (2h)** : Purified by flash chromatography with hexane/ethyl acetate (1/2, v/v): 25 mg (62%, 0.10 mmol scale); pale yellow solid; m.p. 125.7 – 126.7 °C; <sup>1</sup>H NMR (CDCl<sub>3</sub>, 400 MHz):  $\delta$  8.11-8.09 (m, 2H), 8.05-7.99 (dd,  $J$  = 8.5, 14.2 Hz, 2H), 7.95-7.85 (m, 5H), 7.69 (dd,  $J$  = 2.0, 8.5 Hz, 2H), 7.60-7.57 (m, 2H), 7.53-7.43 (m, 5H), 6.55 (d,  $J$  = 25.3 Hz, 1H); <sup>13</sup>C{<sup>1</sup>H} NMR (CDCl<sub>3</sub>, 100 MHz):  $\delta$  157.8 (d, <sup>2</sup> $J_{CP}$  = 16.6 Hz, 1C), 141.6 (d, <sup>2</sup> $J_{CP}$  = 26.1 Hz, 1C), 133.9 (d, <sup>3</sup> $J_{CP}$  = 8.6 Hz, 1C), 133.8 (1C), 133.7 (1C), 133.3 (1C), 132.7 (d, <sup>3</sup> $J_{CP}$  = 16.7 Hz, 1C), 132.4 (d, <sup>4</sup> $J_{CP}$  = 2.8 Hz, 1C), 132.2 (d, <sup>2</sup> $J_{CP}$  = 9.2 Hz, 1C), 131.1 (d, <sup>2</sup> $J_{CP}$  = 10.9 Hz, 2C), 129.77 (d, <sup>1</sup> $J_{CP}$  = 103.2 Hz, 1C), 129.76 (d, <sup>1</sup> $J_{CP}$  = 101.0 Hz, 1C), 129.2 (d, <sup>3</sup> $J_{CP}$  = 12.4 Hz, 2C), 128.84 (d, <sup>4</sup> $J_{CP}$  = 2.0 Hz, 1C), 128.79 (1C), 128.6 (1C), 128.5 (1C), 128.0 (1C), 127.5 (1C), 127.2 (2C), 127.0 (1C), 126.0 (d, <sup>3</sup> $J_{CP}$  = 5.0 Hz, 1C), 125.6 (1C), 124.0 (d, <sup>1</sup> $J_{CP}$  = 99.1 Hz, 1C), 121.5 (d, <sup>3</sup> $J_{CP}$  = 12.8 Hz, 1C); <sup>31</sup>P{<sup>1</sup>H} NMR (CDCl<sub>3</sub>, 162 MHz):  $\delta$  38.09; HRMS (APCI)  $m/z$  (M+H)<sup>+</sup> calcd for C<sub>28</sub>H<sub>20</sub>OP: 403.1246, found: 403.1250.

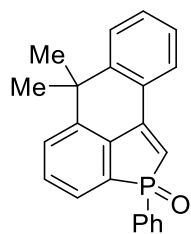

**6,6-Dimethyl-2-phenyl-6H-naphtho[1,2,3-cd]phosphindole 2-oxide (2i)**: pale yellow solid (0.1 mmol scale, 23.9 mg, 70% yield; 3.04 mmol scale, 488.8 mg, 47% yield); m.p. 194.8-195.8 °C (from hexane); TLC  $R_f$  0.20 (hexane/EtOAc, 1:3). <sup>1</sup>H NMR (CDCl<sub>3</sub>, 400 MHz)  $\delta$  7.91 (dd,  $J$  = 7.9, 1.3 Hz, 1H), 7.80-7.75 (m, 2H), 7.69-7.66 (m, 2H), 7.59-7.34 (m, 7H), 6.60 (d,  $J$  = 23.2 Hz, 1H), 1.75 (s, 3H), 1.70 (s, 3H). <sup>13</sup>C{<sup>1</sup>H} NMR (CDCl<sub>3</sub>, 100 MHz)  $\delta$  148.2 (d, <sup>2</sup> $J_{CP}$  = 17.0 Hz, 1C), 146.3 (1C), 141.7 (d, <sup>3</sup> $J_{CP}$  = 11.3 Hz, 1C), 135.6 (d, <sup>2</sup> $J_{CP}$  = 29.5 Hz, 1C), 132.4 (d, <sup>1</sup> $J_{CP}$  = 105.8 Hz, 1C), 132.1 (d, <sup>4</sup> $J_{CP}$  = 2.5 Hz, 1C), 131.4 (1C), 131.0 (d, <sup>2</sup> $J_{CP}$  = 10.8 Hz, 2C), 130.6 (d, <sup>1</sup> $J_{CP}$  = 102.9 Hz, 1C), 130.4 (1C), 130.3 (d, <sup>4</sup> $J_{CP}$  = 1.9 Hz, 1C), 128.7 (d, <sup>3</sup> $J_{CP}$  = 12.2 Hz, 1C), 127.8 (1C), 127.1 (d, <sup>2</sup> $J_{CP}$  = 9.6 Hz, 1C), 126.8 (1C), 126.6 (d, <sup>1</sup> $J_{CP}$  = 96.8 Hz, 1C), 126.0 (1C), 112.0 (d, <sup>3</sup> $J_{CP}$  = 9.7 Hz, 1C), 110.9 (d, <sup>3</sup> $J_{CP}$  = 9.1 Hz, 1C), 38.6 (d, <sup>5</sup> $J_{CP}$  = 1.0 Hz, 1C), 33.3 (d, <sup>4</sup> $J_{CP}$  = 3.4 Hz, 1C), 32.5 (d, <sup>5</sup> $J_{CP}$  = 1.9 Hz, 1C). <sup>31</sup>P{<sup>1</sup>H} NMR (CDCl<sub>3</sub>, 162 MHz)  $\delta$  40.6; HRMS (APCI)  $m/z$  ([M+H]<sup>+</sup>) Calcd for C<sub>23</sub>H<sub>20</sub>OP:

343.1247, Found: 343.1234.

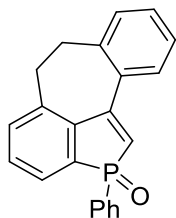

**6-Phenyl-10,11-dihydrobenzo[6,7]cyclohepta[1,2,3-cd]phosphindole 6-oxide (2j):** pale yellow solid (6.0 mmol scale, 905.6 mg, 46% yield); m.p. 157.8-158.8 °C (from hexane); TLC  $R_f$  0.20 (hexane/EtOAc, 1:3).  $^1\text{H}$  NMR ( $\text{CDCl}_3$ , 400 MHz)  $\delta$  7.78 (dd,  $J = 12.6, 7.4$  Hz, 2H), 7.68 (bs, 1H), 7.54-7.50 (m, 2H), 7.43 (td,  $J = 7.7, 2.4$  Hz, 2H), 7.37 (t,  $J = 7.4$  Hz, 1H), 7.30-7.23 (m, 4H), 6.57 (d,  $J = 21.6$  Hz, 1H), 3.12 (bs, 4H).  $^{13}\text{C}\{^1\text{H}\}$  NMR ( $\text{CDCl}_3$ , 100 MHz)  $\delta$  158.4 (d,  $^2J_{\text{CP}} = 11.8$  Hz, 1C), 142.1 (1C), 140.5 (d,  $^3J_{\text{CP}} = 10.6$  Hz, 1C), 139.2 (d,  $^2J_{\text{CP}} = 26.9$  Hz, 1C), 135.0 (d,  $^4J_{\text{CP}} = 1.8$  Hz, 1C), 134.9 (d,  $^3J_{\text{CP}} = 16.1$  Hz, 1C), 132.1 (d,  $^4J_{\text{CP}} = 2.7$  Hz, 1C), 131.1 (d,  $^2J_{\text{CP}} = 10.7$  Hz, 2C), 130.6 (1C), 129.9 (1C), 129.8 (d,  $^1J_{\text{CP}} = 104.1$  Hz, 1C), 129.4 (d,  $^1J_{\text{CP}} = 90.0$  Hz, 1C), 129.1 (d,  $^3J_{\text{CP}} = 11.5$  Hz, 1C), 129.0 (1C), 128.8 (d,  $^3J_{\text{CP}} = 12.5$  Hz, 2C), 127.2 (d,  $^2J_{\text{CP}} = 9.8$  Hz, 1C), 126.9 (1C), 122.9 (d,  $^1J_{\text{CP}} = 98.2$  Hz, 1C), 35.4 (1C), 34.9 (d,  $^4J_{\text{CP}} = 2.1$  Hz, 1C).  $^{31}\text{P}\{^1\text{H}\}$  NMR ( $\text{CDCl}_3$ , 162 MHz)  $\delta$  34.07; HRMS (APCI)  $m/z$  ( $[\text{M}+\text{H}]^+$ ) Calcd for  $\text{C}_{22}\text{H}_{18}\text{OP}$ : 329.1090, Found: 329.1073.

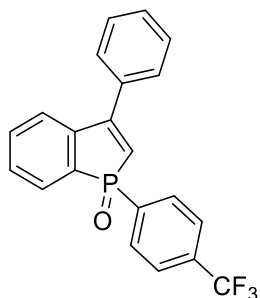

**3-Phenyl-1-(4-(trifluoromethyl)phenyl)phosphindole 1-oxide (2k) :** Purified by flash chromatography with hexane/ethyl acetate (1/2, v/v): 37 mg (99%, 0.10 mmol scale); pale yellow solid; m.p. 43.2 – 44.3 °C;  $^1\text{H}$  NMR ( $\text{CDCl}_3$ , 400 MHz):  $\delta$  7.93-7.88 (m, 2H), 7.71-7.66 (m, 3H), 7.57-7.49 (m, 7H), 7.46-7.43 (m, 1H), 6.36 (d,  $J = 24.3$  Hz, 1H);  $^{13}\text{C}\{^1\text{H}\}$  NMR ( $\text{CDCl}_3$ , 100 MHz):  $\delta$  159.1 (d,  $^2J_{\text{CP}} = 15.8$  Hz, 1C), 142.1 (d,  $^2J_{\text{CP}} = 27.7$  Hz, 1C), 134.8 (d,  $^3J_{\text{CP}} = 16.6$  Hz, 1C), 134.6 (d,  $^1J_{\text{CP}} = 99.5$  Hz, 1C), 134.2 (qd,  $^4J_{\text{CP}}/^2J_{\text{CF}} = 3.0, 32.9$  Hz, 1C), 133.3 (d,  $^1J_{\text{CP}} = 105.6$  Hz, 1C), 133.2 (d,  $^4J_{\text{CP}} = 1.9$  Hz, 1C), 131.7 (d,  $^2J_{\text{CP}} = 11.1$  Hz, 2C), 129.98 (1C), 129.97 (d,  $^2J_{\text{CP}} = 10.6$  Hz, 1C), 129.5 (d,  $^3J_{\text{CP}} = 9.6$  Hz, 1C), 129.0 (2C), 127.9 (2C), 125.8 (qd,  $^3J_{\text{CF}}/^3J_{\text{CP}} = 3.7, 12.4$  Hz, 2C), 124.5 (d,  $^3J_{\text{CP}} = 11.3$  Hz, 1C), 123.7 (q,  $^1J_{\text{CF}} = 273.2$  Hz, 1C), 122.1 (d,  $^1J_{\text{CP}} = 100.0$  Hz, 1C);  $^{19}\text{F}\{^1\text{H}\}$  NMR (376 MHz,  $\text{CDCl}_3$ )  $\delta$  -63.2;  $^{31}\text{P}\{^1\text{H}\}$  NMR ( $\text{CDCl}_3$ , 162 MHz):  $\delta$  35.38; HRMS (APCI)  $m/z$  ( $\text{M}+\text{H}^+$ ) calcd for  $\text{C}_{21}\text{H}_{15}\text{F}_3\text{OP}$ : 371.0807, found: 371.0783.

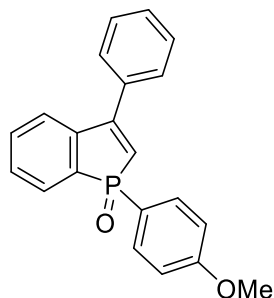

**1-(4-Methoxyphenyl)-3-phenylphosphindole 1-oxide (2l)** : Purified by flash chromatography with hexane/ethyl acetate (1/2, v/v): 18 mg (55%, 0.10 mmol scale); pale yellow oil;  $^1\text{H}$  NMR ( $\text{CDCl}_3$ , 400 MHz):  $\delta$  7.74-7.65 (m, 3H), 7.55-7.52 (m, 2H), 7.51-7.39 (m, 6H), 6.97-6.94 (m, 2H), 6.34 (d,  $J = 23.9$  Hz, 1H), 3.83 (s, 3H);  $^{13}\text{C}\{^1\text{H}\}$  NMR ( $\text{CDCl}_3$ , 100 MHz):  $\delta$  163.1 (d,  $^4J_{\text{CP}} = 2.9$  Hz, 1C), 157.7 (d,  $^2J_{\text{CP}} = 15.3$  Hz, 1C), 142.1 (d,  $^2J_{\text{CP}} = 27.0$  Hz, 1C), 135.3 (d,  $^3J_{\text{CP}} = 16.1$  Hz, 1C), 134.4 (d,  $^1J_{\text{CP}} = 104.6$  Hz, 1C), 133.0 (d,  $^2J_{\text{CP}} = 12.0$  Hz, 2C), 132.60 (d,  $^4J_{\text{CP}} = 1.7$  Hz, 1C), 129.63 (1C), 129.5 (d,  $^2J_{\text{CP}} = 9.9$  Hz, 1C), 129.3 (d,  $^3J_{\text{CP}} = 9.7$  Hz, 1C), 128.9 (2C), 128.0 (2C), 124.1 (d,  $^3J_{\text{CP}} = 11.3$  Hz, 1C), 123.5 (d,  $^1J_{\text{CP}} = 99.3$  Hz, 1C), 120.2 (d,  $^1J_{\text{CP}} = 108.7$  Hz, 1C), 114.7 (d,  $^3J_{\text{CP}} = 13.6$  Hz, 2C), 55.5 (1C);  $^{31}\text{P}\{^1\text{H}\}$  NMR ( $\text{CDCl}_3$ , 162 MHz):  $\delta$  37.19; HRMS (APCI)  $m/z$  ( $\text{M}+\text{H}$ ) $^+$  calcd for  $\text{C}_{21}\text{H}_{18}\text{O}_2\text{P}$ : 333.1039, found: 333.1022.

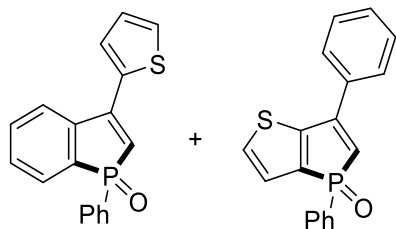

**1-Phenyl-3-(thiophen-2-yl)phosphindole 1-oxide + 4,6-Diphenylphospholo[3,2-*b*]thiophene 4-oxide (2m + 2m', 5:3 mixture)** : Purified by flash chromatography with hexane/ethyl acetate (1/2, v/v): 22 mg (70%, 0.10 mmol scale); pale yellow oil;  $^1\text{H}$  NMR ( $\text{CDCl}_3$ , 400 MHz):  $\delta$  7.81-7.63 (m, 5.2H), 7.57-7.52 (1.6H), 7.49-7.40 (m, 4.2H), 7.35 (dd,  $J = 1.3, 5.0$  Hz, 1H), 6.40 (d,  $J = 23.6$  Hz, 0.6H), 6.29 (dd,  $J = 1.0, 26.2$  Hz, 0.4H);  $^{13}\text{C}\{^1\text{H}\}$  NMR ( $\text{CDCl}_3$ , 100 MHz):  $\delta$  152.6, 142.2, 135.9, 135.7, 134.3, 133.3, 132.9, 132.5, 131.2, 131.1, 130.2, 129.9, 129.8, 129.6, 129.5, 129.2, 129.1, 129.02, 128.96, 127.6, 127.5, 126.8, 125.4, 124.1, 124.0, 122.2, 121.2 (All observed signals are just shown because of complexity associated with C–P couplings and structural isomers.);  $^{31}\text{P}\{^1\text{H}\}$  NMR ( $\text{CDCl}_3$ , 162 MHz) for mixture:  $\delta$  37.49, 28.99; HRMS (APCI)  $m/z$  ( $\text{M}+\text{H}$ ) $^+$  calcd for  $\text{C}_{18}\text{H}_{14}\text{OPS}$ : 309.0497, found: 309.0475.

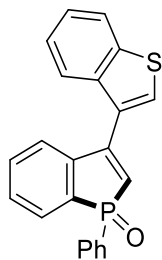

**3-(Benzo[*b*]thiophen-3-yl)-1-phenylphosphindole 1-oxide (2n)** : Purified by flash chromatography with hexane/ethyl acetate (1/2, v/v): 10 mg (28%, 0.10 mmol scale); pale yellow solid; m.p. 67.9 – 69.0 °C;  $^1\text{H}$  NMR ( $\text{CDCl}_3$ , 400 MHz):  $\delta$  7.97-7.94 (m, 1H), 7.87-7.81 (m, 3H), 7.75-7.71 (m, 1H), 7.69 (s, 1H), 7.58-7.54 (m, 1H), 7.75-7.39 (m, 7H), 6.56 (d,  $J = 24.1$  Hz, 1H);  $^{13}\text{C}\{^1\text{H}\}$  NMR ( $\text{CDCl}_3$ , 100 MHz):  $\delta$  151.7 (d,  $^2J_{\text{CP}} = 15.9$  Hz, 1C), 142.4 (d,  $^2J_{\text{CP}} = 27.0$  Hz, 1C), 140.5 (1C), 137.7 (1C), 133.6 (d,  $^1J_{\text{CP}} = 104.4$  Hz, 1C), 132.9 (d,  $^4J_{\text{CP}} = 1.6$  Hz, 1C), 132.5 (d,  $^4J_{\text{CP}} = 2.9$  Hz, 1C), 131.1 (d,  $^2J_{\text{CP}} = 10.8$  Hz, 2C), 130.8 (d,  $^3J_{\text{CP}} = 17.3$  Hz, 1C), 130.0 (d,  $^2J_{\text{CP}} = 10.6$  Hz, 1C), 129.6 (d,  $^1J_{\text{CP}} = 102.7$  Hz, 1C), 129.4 (d,  $^3J_{\text{CP}} = 9.6$  Hz, 1C), 129.1 (d,  $^3J_{\text{CP}} = 12.4$  Hz, 2C), 126.7 (1C), 125.3 (1C), 124.9 (1C), 124.3 (d,  $^1J_{\text{CP}} = 97.9$  Hz, 1C), 124.2 (d,  $^3J_{\text{CP}} = 11.0$  Hz, 1C), 123.3 (1C), 123.1 (1C);  $^{31}\text{P}\{^1\text{H}\}$  NMR ( $\text{CDCl}_3$ , 162 MHz):  $\delta$  37.42; HRMS (APCI)  $m/z$  ( $\text{M}+\text{H}$ ) $^+$  calcd for  $\text{C}_{22}\text{H}_{16}\text{OPS}$ : 359.0654, found: 359.0631.

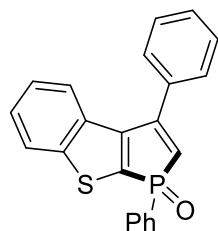

**1,3-Diphenylbenzo[*b*]phospholo[3,2-*d*]thiophene 1-oxide (2n')** : Purified by flash chromatography with hexane/ethyl acetate (1/2, v/v): 5 mg (14%, 0.10 mmol scale); pale yellow solid; m.p. 115.3 – 116.5 °C;  $^1\text{H}$  NMR ( $\text{CDCl}_3$ , 400 MHz):  $\delta$  7.91-7.89 (m, 1H), 7.85-7.79 (m, 2H), 7.59-7.52 (m, 6H), 7.49-7.44 (m, 2H), 7.40-7.36 (m, 2H), 7.26 (dd,  $J = 1.1, 15.3$  Hz, 1H), 6.24 (d,  $J = 26.8$  Hz, 1H);  $^{13}\text{C}\{^1\text{H}\}$  NMR ( $\text{CDCl}_3$ , 100 MHz): The clear spectra was not obtained because of a small amount of the sample.;  $^{31}\text{P}\{^1\text{H}\}$  NMR ( $\text{CDCl}_3$ , 162 MHz):  $\delta$  29.76; HRMS (APCI)  $m/z$  ( $\text{M}+\text{H}$ ) $^+$  calcd for  $\text{C}_{22}\text{H}_{16}\text{OPS}$ : 359.0654, found: 359.0658.

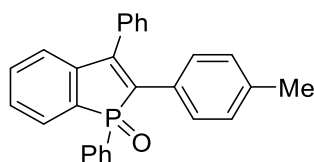

**1,3-Diphenyl-2-(*p*-tolyl)phosphindole 1-oxide (4aa)**: pale yellow solid (0.2 mmol scale, 61.9 mg, 79% yield; 2.0 mmol scale, 510.0 mg, 65% yield); m.p. 159.7-161.0 °C (from hexane); TLC  $R_f$  0.25 (hexane/EtOAc, 1:2).  $^1\text{H}$  NMR ( $\text{CDCl}_3$ , 400 MHz)  $\delta$  7.80-7.75 (m, 2H), 7.71-7.67 (m, 1H), 7.48-7.32

(m, 10H), 7.18 (dd,  $J = 7.6, 2.9$  Hz, 1H), 7.14 (d,  $J = 7.6$  Hz, 2H), 6.89 (d,  $J = 8.2$  Hz, 2H), 2.18 (s, 3H).  $^{13}\text{C}\{^1\text{H}\}$  NMR ( $\text{CDCl}_3$ , 100 MHz)  $\delta$  149.3 (d,  $^2J_{\text{CP}} = 21.8$  Hz, 1C), 143.9 (d,  $^2J_{\text{CP}} = 27.2$  Hz, 1C), 137.8 (1C), 134.5 (d,  $^3J_{\text{CP}} = 15.4$  Hz, 1C), 134.1 (d,  $^1J_{\text{CP}} = 95.7$  Hz, 1C), 132.9 (d,  $^4J_{\text{CP}} = 1.8$  Hz, 1C), 132.1 (d,  $^4J_{\text{CP}} = 2.5$  Hz, 1C), 132.1 (d,  $^1J_{\text{CP}} = 105.6$  Hz, 1C), 131.0 (d,  $^2J_{\text{CP}} = 10.7$  Hz, 2C), 130.1 (d,  $^1J_{\text{CP}} = 99.6$  Hz, 1C), 129.7 (d,  $^2J_{\text{CP}} = 10.1$  Hz, 1C), 129.1 (4C), 129.0 (2C), 128.9 (2C), 128.89 (2C), 128.85 (d,  $^3J_{\text{CP}} = 12.2$  Hz, 2C), 128.6 (1C), 123.9 (d,  $^2J_{\text{CP}} = 10.9$  Hz, 1C), 21.2 (1C).  $^{31}\text{P}\{^1\text{H}\}$  NMR ( $\text{CDCl}_3$ , 162 MHz)  $\delta$  39.2; HRMS (APCI)  $m/z$  ( $[\text{M}+\text{H}]^+$ ) Calcd for  $\text{C}_{27}\text{H}_{22}\text{OP}$ : 393.1408, Found: 393.1407.

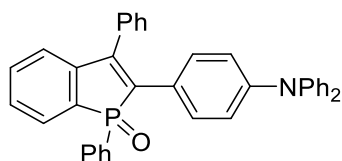

**2-(4-(Diphenylamino)phenyl)-1,3-diphenylphosphindole 1-oxide (4ab):** yellow solid (0.2 mmol scale, 94.8 mg, 87% yield; 1.0 mmol scale, 430.7 mg, 79% yield); TLC  $R_f$  0.20 (hexane/EtOAc, 1:2).  $^1\text{H}$  NMR ( $\text{CDCl}_3$ , 400 MHz)  $\delta$  7.85-7.80 (m, 2H), 7.68-7.64 (m, 1H), 7.52-7.29 (m, 10H), 7.21-7.17 (m, 4H), 7.10 (dd,  $J = 7.5, 2.8$  Hz, 1H), 7.07-6.97 (m, 8H), 6.72 (d,  $J = 8.8$  Hz, 2H).  $^{13}\text{C}\{^1\text{H}\}$  NMR ( $\text{CDCl}_3$ , 100 MHz)  $\delta$  147.8 (d,  $^2J_{\text{CP}} = 21.8$  Hz, 1C), 147.4 (1C), 147.1 (2C), 144.3 (d,  $^2J_{\text{CP}} = 27.2$  Hz, 1C), 135.0 (d,  $^3J_{\text{CP}} = 15.4$  Hz, 1C), 133.5 (d,  $^1J_{\text{CP}} = 95.7$  Hz, 1C), 132.9 (d,  $^4J_{\text{CP}} = 1.8$  Hz, 1C), 132.1 (d,  $^4J_{\text{CP}} = 2.7$  Hz, 1C), 131.8 (d,  $^1J_{\text{CP}} = 106.1$  Hz, 1C), 131.0 (d,  $^2J_{\text{CP}} = 10.5$  Hz, 2C), 130.7 (d,  $^1J_{\text{CP}} = 98.6$  Hz, 1C), 129.9 (d,  $^3J_{\text{CP}} = 6.4$  Hz, 2C), 129.3 (4C), 129.1 (2C), 128.95 (2C), 128.93 (d,  $^3J_{\text{CP}} = 12.0$  Hz, 2C), 128.91 (1C), 128.8 (d,  $^3J_{\text{CP}} = 10.5$  Hz, 1C), 128.6 (1C), 125.7 (d,  $^2J_{\text{CP}} = 10.3$  Hz, 1C), 125.1 (4C), 123.6 (d,  $^2J_{\text{CP}} = 10.9$  Hz, 1C), 123.4 (2C), 121.6 (2C).  $^{31}\text{P}\{^1\text{H}\}$  NMR ( $\text{CDCl}_3$ , 162 MHz)  $\delta$  39.3; HRMS (APCI)  $m/z$  ( $[\text{M}+\text{H}]^+$ ) Calcd for  $\text{C}_{38}\text{H}_{29}\text{NOP}$ : 546.1982, Found: 546.2011.

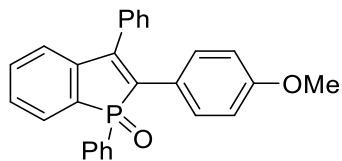

**2-(4-Methoxyphenyl)-1,3-diphenylphosphindole 1-oxide (4ac):** pale yellow solid (0.2 mmol, 60.6 mg, 74% yield); TLC  $R_f$  0.24 (hexane/EtOAc, 1:2).  $^1\text{H}$  NMR ( $\text{CDCl}_3$ , 400 MHz)  $\delta$  7.80-7.75 (m, 2H), 7.70-7.66 (m, 1H), 7.48-7.30 (m, 10H), 7.21-7.19 (m, 2H), 7.15 (dd,  $J = 7.6, 2.9$  Hz, 1H), 6.62 (d,  $J = 8.8$  Hz, 2H), 3.67 (s, 3H).  $^{13}\text{C}\{^1\text{H}\}$  NMR ( $\text{CDCl}_3$ , 100 MHz)  $\delta$  159.2 (1C), 148.3 (d,  $^2J_{\text{CP}} = 21.9$  Hz, 1C), 144.1 (d,  $^2J_{\text{CP}} = 27.2$  Hz, 1C), 134.7 (d,  $^3J_{\text{CP}} = 15.4$  Hz, 1C), 133.6 (d,  $^1J_{\text{CP}} = 96.0$  Hz, 1C), 132.9 (d,  $^4J_{\text{CP}} = 1.5$  Hz, 1C), 132.1 (d,  $^4J_{\text{CP}} = 2.7$  Hz, 1C), 131.8 (d,  $^1J_{\text{CP}} = 105.6$  Hz, 1C), 130.9 (d,  $^2J_{\text{CP}} = 10.5$  Hz, 2C), 130.4 (d,  $^3J_{\text{CP}} = 6.0$  Hz, 2C), 130.3 (d,  $^1J_{\text{CP}} = 99.2$  Hz, 1C), 129.09 (2C), 129.06 (2C), 128.9 (d,  $^3J_{\text{CP}} = 9.8$  Hz, 1C), 128.8 (d,  $^3J_{\text{CP}} = 12.0$  Hz, 2C), 128.7 (d,  $^3J_{\text{CP}} = 10.4$  Hz, 1C), 128.6 (1C),

125.1 (d,  $^2J_{CP} = 10.3$  Hz, 1C), 123.7 (d,  $^2J_{CP} = 10.9$  Hz, 1C), 113.8 (2C), 55.1 (1C).  $^{31}\text{P}\{^1\text{H}\}$  NMR ( $\text{CDCl}_3$ , 162 MHz)  $\delta$  39.2; HRMS (APCI)  $m/z$  ( $[\text{M}+\text{H}]^+$ ) Calcd for  $\text{C}_{27}\text{H}_{22}\text{O}_2\text{P}$ : 409.1352, Found: 409.1367.

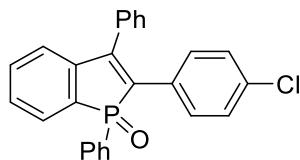

**2-(4-Chlorophenyl)-1,3-diphenylphosphindole 1-oxide (4ad):** colorless solid (0.2 mmol, 66.7 mg, 81% yield); m.p. 104.6-105.9 °C (from hexane); TLC  $R_f$  0.25 (hexane/EtOAc, 1:2).  $^1\text{H}$  NMR ( $\text{CDCl}_3$ , 400 MHz)  $\delta$  7.77-7.69 (m, 3H), 7.51-7.36 (m, 8H), 7.32-7.30 (m, 2H), 7.21 (dd,  $J = 7.5, 2.9$  Hz, 1H), 7.19-7.16 (m, 2H), 7.07-7.05 (m, 2H).  $^{13}\text{C}\{^1\text{H}\}$  NMR ( $\text{CDCl}_3$ , 100 MHz)  $\delta$  150.5 (d,  $^2J_{CP} = 21.1$  Hz, 1C), 143.6 (d,  $^2J_{CP} = 26.7$  Hz, 1C), 133.9 (d,  $^3J_{CP} = 14.7$  Hz, 1C), 133.8 (1C), 133.1 (d,  $^1J_{CP} = 95.7$  Hz, 1C), 133.0 (d,  $^4J_{CP} = 1.9$  Hz, 1C), 132.4 (1C), 132.3 (d,  $^4J_{CP} = 2.9$  Hz, 1C), 131.9 (d,  $^1J_{CP} = 105.3$  Hz, 1C), 131.3 (1C), 130.9 (d,  $^2J_{CP} = 10.8$  Hz, 2C), 130.6 (d,  $^1J_{CP} = 112.6$  Hz, 1C), 130.3 (d,  $^3J_{CP} = 5.7$  Hz, 2C), 129.3 (d,  $^2J_{CP} = 10.7$  Hz, 1C), 129.15 (d,  $^3J_{CP} = 9.7$  Hz, 1C), 129.14 (2C), 128.96 (d,  $^3J_{CP} = 12.2$  Hz, 2C), 128.93 (2C), 128.6 (2C), 124.2 (d,  $^2J_{CP} = 10.7$  Hz, 1C).  $^{31}\text{P}\{^1\text{H}\}$  NMR ( $\text{CDCl}_3$ , 162 MHz)  $\delta$  39.0; HRMS (APCI)  $m/z$  ( $[\text{M}+\text{H}]^+$ ) Calcd for  $\text{C}_{26}\text{H}_{19}\text{ClOP}$ : 413.0857, Found: 413.0878.

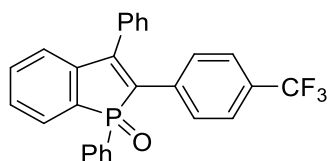

**1,3-Diphenyl-2-(4-(trifluoromethyl)phenyl)phosphindole 1-oxide (4ae):** colorless solid (0.2 mmol, 45.5 mg, 51% yield); m.p. 94.3-95.6 °C (from hexane); TLC  $R_f$  0.23 (hexane/EtOAc, 1:2).  $^1\text{H}$  NMR ( $\text{CDCl}_3$ , 400 MHz)  $\delta$  7.78-7.71 (m, 3H), 7.53-7.39 (m, 8H), 7.34-7.31 (m, 6H), 7.25 (dd,  $J = 6.5, 1.8$  Hz, 1H).  $^{13}\text{C}\{^1\text{H}\}$  NMR ( $\text{CDCl}_3$ , 100 MHz)  $\delta$  151.8 (d,  $^2J_{CP} = 20.9$  Hz, 1C), 143.3 (d,  $^2J_{CP} = 26.4$  Hz, 1C), 136.5 (d,  $^2J_{CP} = 10.2$  Hz, 1C), 133.6 (d,  $^3J_{CP} = 14.5$  Hz, 1C), 133.1 (d,  $^4J_{CP} = 1.8$  Hz, 1C), 133.0 (d,  $^1J_{CP} = 95.8$  Hz, 1C), 132.5 (d,  $^4J_{CP} = 2.9$  Hz, 1C), 132.0 (d,  $^1J_{CP} = 106.3$  Hz, 1C), 130.9 (d,  $^2J_{CP} = 10.7$  Hz, 2C), 129.6 (d,  $^3J_{CP} = 10.8$  Hz, 1C), 129.5 (q,  $^2J_{CF} = 32.2$  Hz, 1C), 129.4 (1C), 129.3 (d,  $^1J_{CP} = 99.9$  Hz, 1C), 129.2 (2C), 129.18 (2C), 129.10 (2C), 128.93 (d,  $^3J_{CP} = 12.4$  Hz, 2C), 128.90 (1C), 125.2 (q,  $^3J_{CF} = 3.8$  Hz, 2C), 124.5 (d,  $^2J_{CP} = 10.9$  Hz, 1C), 124.0 (q,  $^1J_{CF} = 272.1$  Hz, 1C).  $^{19}\text{F}\{^1\text{H}\}$  NMR ( $\text{CDCl}_3$ , 376 MHz)  $\delta$  -62.8.  $^{31}\text{P}\{^1\text{H}\}$  NMR ( $\text{CDCl}_3$ , 162 MHz)  $\delta$  39.0; HRMS (APCI)  $m/z$  ( $[\text{M}+\text{H}]^+$ ) Calcd for  $\text{C}_{27}\text{H}_{19}\text{F}_3\text{OP}$ : 447.1121, Found: 447.1131.



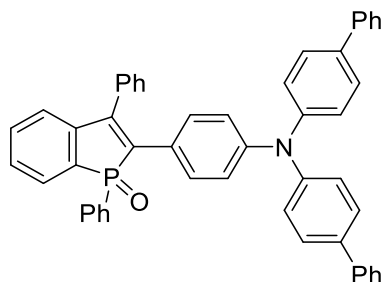

**2-(4-(Di([1,1'-biphenyl]-4-yl)amino)phenyl)-1,3-diphenylphosphindole 1-oxide (4af):** orange solid (0.2 mmol, 92.1 mg, 66% yield); m.p. 151.7-153.0 °C (from hexane); TLC  $R_f$  0.20 (hexane/EtOAc, 1:2).  $^1\text{H}$  NMR ( $\text{CDCl}_3$ , 400 MHz)  $\delta$  7.87-7.82 (m, 2H), 7.66 (dd,  $J = 9.2, 7.3$  Hz, 1H), 7.54-7.52 (m, 4H), 7.50-7.37 (m, 17H), 7.33-7.27 (m, 3H), 7.13-7.08 (m, 7H), 6.83 (d,  $J = 8.8$  Hz, 2H).  $^{13}\text{C}\{^1\text{H}\}$  NMR ( $\text{CDCl}_3$ , 100 MHz)  $\delta$  148.1 (d,  $^2J_{\text{CP}} = 22.0$  Hz, 1C), 147.4 (1C), 146.2 (2C), 144.3 (d,  $^2J_{\text{CP}} = 27.1$  Hz, 1C), 140.5 (2C), 136.2 (2C), 135.0 (d,  $^3J_{\text{CP}} = 15.2$  Hz, 1C), 133.4 (d,  $^1J_{\text{CP}} = 95.7$  Hz, 1C), 133.0 (d,  $^4J_{\text{CP}} = 1.6$  Hz, 1C), 132.2 (d,  $^4J_{\text{CP}} = 2.5$  Hz, 1C), 131.9 (d,  $^1J_{\text{CP}} = 106.2$  Hz, 1C), 131.0 (d,  $^2J_{\text{CP}} = 10.7$  Hz, 2C), 130.7 (d,  $^1J_{\text{CP}} = 98.6$  Hz, 1C), 130.1 (d,  $^3J_{\text{CP}} = 6.3$  Hz, 2C), 129.2 (2C), 129.0 (d,  $^3J_{\text{CP}} = 12.2$  Hz, 2C), 128.97 (2C), 128.92 (d,  $^3J_{\text{CP}} = 10.3$  Hz, 1C), 128.79 (4C), 128.78 (1C), 128.73 (d,  $^3J_{\text{CP}} = 9.5$  Hz, 1C), 127.9 (4C), 127.0 (2C), 126.8 (4C), 126.3 (d,  $^2J_{\text{CP}} = 10.0$  Hz, 1C), 125.1 (4C), 123.7 (d,  $^2J_{\text{CP}} = 10.7$  Hz, 1C), 122.2 (2C).  $^{31}\text{P}\{^1\text{H}\}$  NMR ( $\text{CDCl}_3$ , 162 MHz)  $\delta$  39.3; HRMS (APCI)  $m/z$  ( $[\text{M}+\text{H}]^+$ ) Calcd for  $\text{C}_{50}\text{H}_{37}\text{NOP}$ : 698.2608, Found: 698.2635.

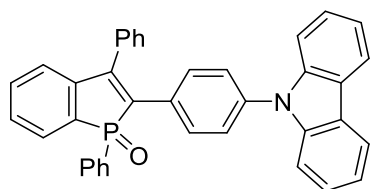

**2-(4-(9H-Carbazol-9-yl)phenyl)-1,3-diphenylphosphindole 1-oxide (4ag):** yellow solid (0.2 mmol, 76.0 mg, 70% yield); m.p. 135.7-137.0 °C (from hexane); TLC  $R_f$  0.22 (hexane/EtOAc, 1:2).  $^1\text{H}$  NMR ( $\text{CDCl}_3$ , 400 MHz)  $\delta$  8.07 (d,  $J = 7.7$  Hz, 2H), 7.90-7.84 (m, 2H), 7.74 (dd,  $J = 9.4, 7.2$  Hz, 1H), 7.56-7.38 (m, 12H), 7.37-7.30 (m, 6H), 7.25-7.21 (m, 3H).  $^{13}\text{C}\{^1\text{H}\}$  NMR ( $\text{CDCl}_3$ , 100 MHz)  $\delta$  150.6 (d,  $^2J_{\text{CP}} = 21.2$  Hz, 1C), 143.7 (d,  $^2J_{\text{CP}} = 26.7$  Hz, 1C), 140.4 (2C), 137.2 (1C), 134.2 (d,  $^3J_{\text{CP}} = 14.8$  Hz, 1C), 133.4 (d,  $^1J_{\text{CP}} = 96.2$  Hz, 1C), 133.1 (d,  $^4J_{\text{CP}} = 1.7$  Hz, 1C), 132.4 (d,  $^4J_{\text{CP}} = 2.8$  Hz, 1C), 132.1 (d,  $^1J_{\text{CP}} = 106.1$  Hz, 1C), 131.6 (d,  $^2J_{\text{CP}} = 10.0$  Hz, 1C), 131.0 (d,  $^2J_{\text{CP}} = 10.8$  Hz, 2C), 130.5 (d,  $^3J_{\text{CP}} = 6.0$  Hz, 2C), 130.0 (d,  $^1J_{\text{CP}} = 98.5$  Hz, 1C), 129.4 (d,  $^3J_{\text{CP}} = 10.8$  Hz, 1C), 129.2 (2C), 129.1 (d,  $^3J_{\text{CP}} = 12.7$  Hz, 2C), 129.09 (1C), 129.03 (3C), 126.5 (2C), 125.9 (2C), 124.3 (d,  $^2J_{\text{CP}} = 10.8$  Hz, 1C), 123.5 (2C), 120.3 (2C), 120.1 (2C), 109.9 (2C).  $^{31}\text{P}\{^1\text{H}\}$  NMR ( $\text{CDCl}_3$ , 162 MHz)  $\delta$  39.1; HRMS (APCI)  $m/z$  ( $[\text{M}+\text{H}]^+$ ) Calcd for  $\text{C}_{38}\text{H}_{27}\text{NOP}$ : 544.1825, Found: 544.1850.

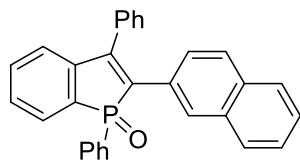

**2-(Naphthalen-2-yl)-1,3-diphenylphosphindole 1-oxide (4ah):** colorless solid (0.2 mmol, 69.3 mg, 81% yield); m.p. 92.7-94.3 °C (from hexane); TLC  $R_f$  0.25 (hexane/EtOAc, 1:2).  $^1\text{H}$  NMR ( $\text{CDCl}_3$ , 400 MHz)  $\delta$  7.97 (bs, 1H), 7.83-7.72 (m, 3H), 7.66-7.63 (m, 2H), 7.50-7.34 (m, 13H), 7.26 (dd,  $J = 7.6, 2.9$  Hz, 1H), 7.14 (dd,  $J = 8.6, 0.9$  Hz, 1H).  $^{13}\text{C}\{^1\text{H}\}$  NMR ( $\text{CDCl}_3$ , 100 MHz)  $\delta$  150.3 (d,  $^2J_{\text{CP}} = 21.1$  Hz, 1C), 143.7 (d,  $^2J_{\text{CP}} = 26.8$  Hz, 1C), 134.3 (d,  $^3J_{\text{CP}} = 14.8$  Hz, 1C), 134.1 (d,  $^1J_{\text{CP}} = 96.2$  Hz, 1C), 133.1 (1C), 133.0 (d,  $^4J_{\text{CP}} = 1.9$  Hz, 1C), 132.6 (1C), 132.2 (d,  $^4J_{\text{CP}} = 2.8$  Hz, 1C), 132.1 (d,  $^1J_{\text{CP}} = 106.0$  Hz, 1C), 130.9 (d,  $^2J_{\text{CP}} = 10.3$  Hz, 2C), 130.4 (1C), 129.9 (d,  $^1J_{\text{CP}} = 90.1$  Hz, 1C), 129.19 (2C), 129.18 (d,  $^2J_{\text{CP}} = 10.5$  Hz, 1C), 129.10 (1C), 129.05 (2C), 128.9 (d,  $^3J_{\text{CP}} = 12.5$  Hz, 2C), 128.8 (1C), 128.7 (d,  $^3J_{\text{CP}} = 5.4$  Hz, 1C), 128.5 (1C), 127.7 (1C), 127.4 (1C), 126.6 (d,  $^3J_{\text{CP}} = 6.2$  Hz, 1C), 126.4 (1C), 126.0 (1C), 124.1 (d,  $^2J_{\text{CP}} = 11.0$  Hz, 1C).  $^{31}\text{P}\{^1\text{H}\}$  NMR ( $\text{CDCl}_3$ , 162 MHz)  $\delta$  39.2; HRMS (APCI)  $m/z$  ( $[\text{M}+\text{H}]^+$ ) Calcd for  $\text{C}_{30}\text{H}_{22}\text{OP}$ : 429.1403, Found: 429.1419.

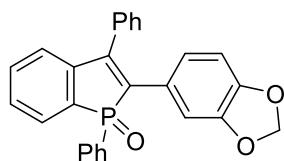

**2-(Benzo[*d*][1,3]dioxol-5-yl)-1,3-diphenylphosphindole 1-oxide (4ai):** pale yellow solid (0.2 mmol, 57.4 mg, 68% yield); m.p. 209.1-210.5 °C (from hexane); TLC  $R_f$  0.22 (hexane/EtOAc, 1:2).  $^1\text{H}$  NMR ( $\text{CDCl}_3$ , 400 MHz)  $\delta$  7.79-7.74 (m, 2H), 7.70-7.66 (m, 1H), 7.51-7.38 (m, 7H), 7.35-7.32 (m, 3H), 7.16 (dd,  $J = 7.5, 2.9$  Hz, 1H), 6.91 (dt,  $J = 8.2, 1.6$  Hz, 1H), 6.61 (dd,  $J = 1.3, 1.0$  Hz, 1H), 6.57 (d,  $J = 8.2$  Hz, 1H), 5.81 (d,  $J = 1.5$  Hz, 1H), 5.80 (d,  $J = 1.5$  Hz, 1H).  $^{13}\text{C}\{^1\text{H}\}$  NMR ( $\text{CDCl}_3$ , 100 MHz)  $\delta$  148.9 (d,  $^2J_{\text{CP}} = 21.6$  Hz, 1C), 147.4 (1C), 147.3 (1C), 143.9 (d,  $^2J_{\text{CP}} = 26.7$  Hz, 1C), 134.4 (d,  $^3J_{\text{CP}} = 14.9$  Hz, 1C), 133.8 (d,  $^1J_{\text{CP}} = 96.4$  Hz, 1C), 132.9 (d,  $^4J_{\text{CP}} = 1.8$  Hz, 1C), 132.2 (d,  $^4J_{\text{CP}} = 2.7$  Hz, 1C), 131.8 (d,  $^1J_{\text{CP}} = 106.0$  Hz, 1C), 130.9 (d,  $^2J_{\text{CP}} = 10.8$  Hz, 2C), 130.0 (d,  $^1J_{\text{CP}} = 99.7$  Hz, 1C), 129.1 (1C), 129.05 (1C), 129.0 (2C), 128.95 (2C), 128.90 (1C), 128.8 (d,  $^3J_{\text{CP}} = 10.1$  Hz, 2C), 126.5 (d,  $^2J_{\text{CP}} = 10.4$  Hz, 1C), 123.8 (d,  $^2J_{\text{CP}} = 11.0$  Hz, 1C), 123.5 (d,  $^3J_{\text{CP}} = 5.8$  Hz, 1C), 109.2 (d,  $^3J_{\text{CP}} = 6.3$  Hz, 1C), 108.3 (1C), 100.9 (1C).  $^{31}\text{P}\{^1\text{H}\}$  NMR ( $\text{CDCl}_3$ , 162 MHz)  $\delta$  39.1; HRMS (APCI)  $m/z$  ( $[\text{M}+\text{H}]^+$ ) Calcd for  $\text{C}_{27}\text{H}_{20}\text{O}_3\text{P}$ : 423.1145, Found: 423.1155.

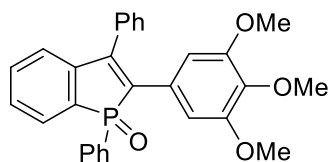

**1,3-Diphenyl-2-(3,4,5-trimethoxyphenyl)phosphindole 1-oxide (4aj):** pale yellow solid (0.2 mmol, 64.6 mg, 69% yield); m.p. 197.1-198.4 °C (from hexane); TLC  $R_f$  0.20 (hexane/EtOAc, 1:2).  $^1\text{H}$  NMR ( $\text{CDCl}_3$ , 400 MHz)  $\delta$  7.85-7.80 (m, 2H), 7.69 (dd,  $J = 9.2, 7.1$  Hz, 1H), 7.54-7.40 (m, 7H), 7.39-7.34 (m, 3H), 7.17 (dd,  $J = 7.5, 2.9$  Hz, 1H), 6.45 (d,  $J = 0.7$  Hz, 2H), 3.74 (s, 3H), 3.44 (s, 6H).  $^{13}\text{C}\{^1\text{H}\}$  NMR ( $\text{CDCl}_3$ , 100 MHz)  $\delta$  152.7 (2C), 149.2 (d,  $^2J_{\text{CP}} = 21.5$  Hz, 1C), 144.0 (d,  $^2J_{\text{CP}} = 26.8$  Hz, 1C), 137.7 (1C), 134.8 (d,  $^3J_{\text{CP}} = 14.8$  Hz, 1C), 134.0 (d,  $^1J_{\text{CP}} = 96.5$  Hz, 1C), 133.0 (d,  $^4J_{\text{CP}} = 1.5$  Hz, 1C), 132.2 (d,  $^4J_{\text{CP}} = 2.6$  Hz, 1C), 131.7 (d,  $^1J_{\text{CP}} = 106.3$  Hz, 1C), 131.0 (d,  $^2J_{\text{CP}} = 10.7$  Hz, 2C), 130.4 (d,  $^1J_{\text{CP}} = 99.0$  Hz, 1C), 129.2 (2C), 129.1 (d,  $^3J_{\text{CP}} = 10.1$  Hz, 1C), 129.0 (1C), 128.97 (2C), 128.95 (d,  $^3J_{\text{CP}} = 12.2$  Hz, 2C), 128.6 (1C), 127.8 (d,  $^2J_{\text{CP}} = 10.4$  Hz, 1C), 123.9 (d,  $^2J_{\text{CP}} = 10.9$  Hz, 1C), 106.4 (d,  $^3J_{\text{CP}} = 6.4$  Hz, 2C), 60.7 (1C), 55.5 (2C).  $^{31}\text{P}\{^1\text{H}\}$  NMR ( $\text{CDCl}_3$ , 162 MHz)  $\delta$  38.7; HRMS (APCI)  $m/z$  ( $[\text{M}+\text{H}]^+$ ) Calcd for  $\text{C}_{29}\text{H}_{26}\text{O}_4\text{P}$ : 469.1564, Found: 469.1543.

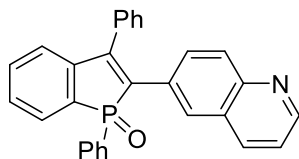

**1,3-Diphenyl-2-(quinolin-6-yl)phosphindole 1-oxide (4ak):** orange solid (0.2 mmol, 53.2 mg, 62% yield); m.p. 111.4-112.7 °C (from hexane); TLC  $R_f$  0.24 (hexane/EtOAc, 1:3).  $^1\text{H}$  NMR ( $\text{CDCl}_3$ , 400 MHz)  $\delta$  8.80 (dd,  $J = 4.1, 1.5$  Hz, 1H), 8.03 (s, 1H), 7.99 (d,  $J = 8.4$  Hz, 1H), 7.82-7.72 (m, 4H), 7.52-7.36 (m, 10H), 7.32-7.28 (m, 3H).  $^{13}\text{C}\{^1\text{H}\}$  NMR ( $\text{CDCl}_3$ , 100 MHz)  $\delta$  151.0 (d,  $^2J_{\text{CP}} = 20.8$  Hz, 1C), 150.7 (1C), 147.5 (1C), 143.5 (d,  $^2J_{\text{CP}} = 26.7$  Hz, 1C), 136.4 (1C), 133.9 (d,  $^3J_{\text{CP}} = 14.5$  Hz, 1C), 133.5 (d,  $^1J_{\text{CP}} = 95.7$  Hz, 1C), 133.1 (d,  $^4J_{\text{CP}} = 1.6$  Hz, 1C), 132.4 (d,  $^4J_{\text{CP}} = 2.8$  Hz, 1C), 132.0 (d,  $^4J_{\text{CP}} = 1.9$  Hz, 1C), 132.2 (d,  $^4J_{\text{CP}} = 2.8$  Hz, 1C), 132.0 (d,  $^1J_{\text{CP}} = 106.2$  Hz, 1C), 131.3 (1C), 130.9 (d,  $^2J_{\text{CP}} = 10.5$  Hz, 2C), 130.7 (d,  $^1J_{\text{CP}} = 108.4$  Hz, 1C), 130.3 (d,  $^3J_{\text{CP}} = 6.1$  Hz, 1C), 129.4 (d,  $^2J_{\text{CP}} = 10.8$  Hz, 1C), 129.3 (1C), 129.2 (2C), 129.1 (1C), 129.0 (1C), 128.9 (d,  $^3J_{\text{CP}} = 12.3$  Hz, 2C), 128.3 (d,  $^3J_{\text{CP}} = 5.2$  Hz, 1C), 128.1 (1C), 124.3 (d,  $^2J_{\text{CP}} = 10.8$  Hz, 1C), 121.3 (1C).  $^{31}\text{P}\{^1\text{H}\}$  NMR ( $\text{CDCl}_3$ , 162 MHz)  $\delta$  39.1; HRMS (APCI)  $m/z$  ( $[\text{M}+\text{H}]^+$ ) Calcd for  $\text{C}_{29}\text{H}_{21}\text{NOP}$ : 430.1356, Found: 430.1362.

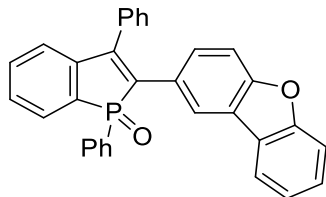

**2-(Dibenzo[b,d]furan-2-yl)-1,3-diphenylphosphindole 1-oxide (4al):** pale yellow solid (0.2 mmol, 67.4 mg, 72% yield); m.p. 108.9-109.6 °C (from hexane); TLC  $R_f$  0.22 (hexane/EtOAc, 1:2).  $^1\text{H}$  NMR ( $\text{CDCl}_3$ , 400 MHz)  $\delta$  7.89 (s, 1H), 7.83-7.70 (m, 4H), 7.50-7.36 (m, 12H), 7.31-7.24 (m, 4H).  $^{13}\text{C}\{^1\text{H}\}$  NMR ( $\text{CDCl}_3$ , 100 MHz)  $\delta$  156.4 (1C), 155.6 (1C), 149.6 (d,  $^2J_{\text{CP}} = 21.7$  Hz, 1C), 143.8 (d,  $^2J_{\text{CP}} = 26.8$  Hz, 1C), 134.3 (d,  $^3J_{\text{CP}} = 14.9$  Hz, 1C), 134.2 (d,  $^1J_{\text{CP}} = 96.2$  Hz, 1C), 133.0 (d,  $^4J_{\text{CP}} = 1.9$  Hz,

1C), 132.2 (d,  $^4J_{CP} = 2.8$  Hz, 1C), 131.9 (d,  $^1J_{CP} = 106.1$  Hz, 1C), 131.0 (d,  $^2J_{CP} = 10.6$  Hz, 2C), 129.9 (d,  $^1J_{CP} = 99.8$  Hz, 1C), 129.18 (2C), 129.17 (d,  $^3J_{CP} = 9.6$  Hz, 1C), 129.09 (2C), 129.06 (1C), 128.9 (d,  $^3J_{CP} = 12.3$  Hz, 2C), 128.7 (1C), 128.5 (d,  $^3J_{CP} = 5.9$  Hz, 1C), 127.5 (d,  $^2J_{CP} = 10.0$  Hz, 1C), 127.3 (1C), 124.3 (1C), 124.0 (d,  $^2J_{CP} = 10.7$  Hz, 1C), 123.9 (1C), 122.8 (1C), 121.3 (d,  $^4J_{CP} = 5.6$  Hz, 1C), 120.8 (1C), 111.6 (2C).  $^{31}\text{P}\{^1\text{H}\}$  NMR ( $\text{CDCl}_3$ , 162 MHz)  $\delta$  39.1; HRMS (APCI)  $m/z$  ( $[\text{M}+\text{H}]^+$ ) Calcd for  $\text{C}_{32}\text{H}_{22}\text{O}_2\text{P}$ : 469.1352, Found: 469.1366.

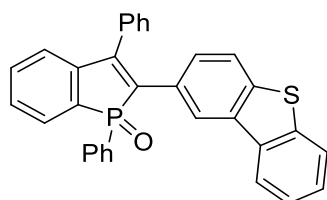

**2-(Dibenzo[*b,d*]thiophen-2-yl)-1,3-diphenylphosphindole 1-oxide (4am):** yellow solid (0.2 mmol, 66.8 mg, 69% yield); m.p. 108.0-109.3 °C (from hexane); TLC  $R_f$  0.22 (hexane/EtOAc, 1:2).  $^1\text{H}$  NMR ( $\text{CDCl}_3$ , 400 MHz)  $\delta$  8.03 (s, 1H), 7.86-7.81 (m, 2H), 7.78-7.74 (m, 3H), 7.55 (d,  $J = 8.4$  Hz, 1H), 7.51-7.34 (m, 13H), 7.27 (dd,  $J = 7.5, 3.0$  Hz, 1H).  $^{13}\text{C}\{^1\text{H}\}$  NMR ( $\text{CDCl}_3$ , 100 MHz)  $\delta$  149.9 (d,  $^2J_{CP} = 21.7$  Hz, 1C), 143.9 (d,  $^2J_{CP} = 26.9$  Hz, 1C), 139.5 (1C), 139.1 (1C), 135.5 (1C), 135.3 (1C), 134.4 (d,  $^3J_{CP} = 14.9$  Hz, 1C), 134.1 (d,  $^1J_{CP} = 96.0$  Hz, 1C), 133.0 (d,  $^4J_{CP} = 1.8$  Hz, 1C), 132.3 (d,  $^4J_{CP} = 2.8$  Hz, 1C), 132.0 (d,  $^1J_{CP} = 106.3$  Hz, 1C), 131.0 (d,  $^2J_{CP} = 10.6$  Hz, 2C), 130.0 (d,  $^1J_{CP} = 99.6$  Hz, 1C), 129.2 (2C), 129.16 (d,  $^2J_{CP} = 10.8$  Hz, 1C), 129.11 (d,  $^3J_{CP} = 9.7$  Hz, 1C), 129.10 (3C), 128.9 (d,  $^3J_{CP} = 12.3$  Hz, 2C), 128.8 (1C), 127.6 (d,  $^3J_{CP} = 5.6$  Hz, 1C), 126.8 (1C), 124.4 (1C), 124.1 (d,  $^2J_{CP} = 10.7$  Hz, 1C), 122.7 (1C), 122.6 (1C), 122.1 (d,  $^3J_{CP} = 6.2$  Hz, 1C), 121.6 (1C).  $^{31}\text{P}\{^1\text{H}\}$  NMR ( $\text{CDCl}_3$ , 162 MHz)  $\delta$  39.1; HRMS (APCI)  $m/z$  ( $[\text{M}+\text{H}]^+$ ) Calcd for  $\text{C}_{32}\text{H}_{22}\text{OPS}$ : 485.1124, Found: 485.1130.

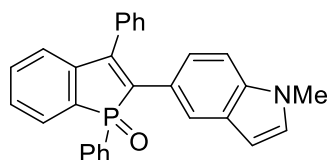

**2-(1-Methyl-1*H*-indol-5-yl)-1,3-diphenylphosphindole 1-oxide (4an):** yellow solid (0.2 mmol, 56.0 mg, 65% yield); m.p. 121.4-122.7 °C (from hexane); TLC  $R_f$  0.24 (hexane/EtOAc, 1:2).  $^1\text{H}$  NMR ( $\text{CDCl}_3$ , 400 MHz)  $\delta$  7.82-7.77 (m, 2H), 7.72-7.68 (m, 2H), 7.44-7.30 (m, 10H), 7.19 (dd,  $J = 7.6, 2.8$  Hz, 1H), 7.06 (d,  $J = 8.5$  Hz, 1H), 6.99 (d,  $J = 8.5$  Hz, 1H), 6.91 (d,  $J = 3.0$  Hz, 1H), 6.31 (d,  $J = 3.0$  Hz, 1H), 3.63 (s, 3H).  $^{13}\text{C}\{^1\text{H}\}$  NMR ( $\text{CDCl}_3$ , 100 MHz)  $\delta$  147.8 (d,  $^2J_{CP} = 22.2$  Hz, 1C), 144.2 (d,  $^2J_{CP} = 27.6$  Hz, 1C), 136.1 (1C), 135.1 (d,  $^1J_{CP} = 95.6$  Hz, 1C), 135.0 (d,  $^3J_{CP} = 15.1$  Hz, 1C), 132.8 (d,  $^4J_{CP} = 1.3$  Hz, 1C), 132.1 (d,  $^1J_{CP} = 105.4$  Hz, 1C), 131.9 (d,  $^4J_{CP} = 2.8$  Hz, 1C), 131.0 (d,  $^2J_{CP} = 10.6$  Hz, 2C), 130.5 (d,  $^1J_{CP} = 99.7$  Hz, 1C), 129.3 (2C), 129.1 (1C), 129.0 (2C), 128.9 (d,  $^3J_{CP} = 9.5$  Hz, 1C), 128.7 (d,  $^3J_{CP} = 12.2$  Hz, 2C), 128.5 (d,  $^2J_{CP} = 10.4$  Hz, 1C), 128.4 (1C), 128.2 (1C),

123.8 (d,  $^3J_{CP} = 10.2$  Hz, 1C), 123.6 (d,  $^2J_{CP} = 11.0$  Hz, 1C), 123.1 (d,  $^3J_{CP} = 6.3$  Hz, 1C), 122.1 (d,  $^3J_{CP} = 5.9$  Hz, 1C), 109.1 (1C), 101.7 (1C), 32.8 (1C).  $^{31}\text{P}\{^1\text{H}\}$  NMR ( $\text{CDCl}_3$ , 162 MHz)  $\delta$  39.3; HRMS (APCI)  $m/z$  ( $[\text{M}+\text{H}]^+$ ) Calcd for  $\text{C}_{29}\text{H}_{23}\text{NOP}$ : 432.1512, Found: 432.1534.

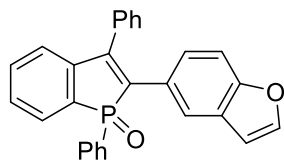

**2-(Benzofuran-5-yl)-1,3-diphenylphosphindole 1-oxide (4ao):** pale yellow solid (0.2 mmol, 46.8 mg, 56% yield); m.p. 202.8-204.1 °C (from hexane); TLC  $R_f$  0.25 (hexane/EtOAc, 1:2).  $^1\text{H}$  NMR ( $\text{CDCl}_3$ , 400 MHz)  $\delta$  7.80-7.70 (m, 3H), 7.66 (s, 1H), 7.49 (d,  $J = 2.3$  Hz, 1H), 7.47-7.33 (m, 10H), 7.23 (dd,  $J = 7.5, 2.9$  Hz, 1H), 7.18 (dd,  $J = 8.7, 0.6$  Hz, 1H), 7.07 (dt,  $J = 8.7, 1.4$  Hz, 1H), 6.59 (dd,  $J = 2.2, 0.9$  Hz, 1H).  $^{13}\text{C}\{^1\text{H}\}$  NMR ( $\text{CDCl}_3$ , 100 MHz)  $\delta$  154.4 (1C), 149.4 (d,  $^2J_{CP} = 21.6$  Hz, 1C), 145.2 (1C), 143.8 (d,  $^2J_{CP} = 27.1$  Hz, 1C), 134.4 (d,  $^1J_{CP} = 95.6$  Hz, 1C), 134.3 (d,  $^3J_{CP} = 15.4$  Hz, 1C), 132.9 (d,  $^4J_{CP} = 1.7$  Hz, 1C), 132.2 (d,  $^4J_{CP} = 2.8$  Hz, 1C), 132.0 (d,  $^1J_{CP} = 105.5$  Hz, 1C), 131.0 (d,  $^2J_{CP} = 10.6$  Hz, 2C), 129.9 (d,  $^1J_{CP} = 99.5$  Hz, 1C), 129.2 (2C), 129.1 (1C), 129.05 (1C), 129.01 (2C), 128.9 (1C), 128.8 (d,  $^3J_{CP} = 12.2$  Hz, 2C), 128.6 (1C), 127.4 (d,  $^2J_{CP} = 10.0$  Hz, 1C), 125.7 (d,  $^3J_{CP} = 6.2$  Hz, 1C), 123.9 (d,  $^2J_{CP} = 10.9$  Hz, 1C), 122.1 (d,  $^3J_{CP} = 5.3$  Hz, 1C), 111.3 (1C), 106.9 (1C).  $^{31}\text{P}\{^1\text{H}\}$  NMR ( $\text{CDCl}_3$ , 162 MHz)  $\delta$  39.1; HRMS (APCI)  $m/z$  ( $[\text{M}+\text{H}]^+$ ) Calcd for  $\text{C}_{28}\text{H}_{20}\text{O}_2\text{P}$ : 419.1196, Found: 419.1197.

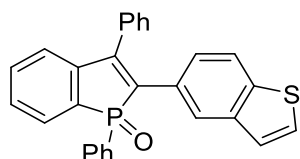

**2-(Benzo[*b*]thiophen-5-yl)-1,3-diphenylphosphindole 1-oxide (4ap):** pale yellow solid (0.2 mmol, 53.8 mg, 62% yield); m.p. 200.1-201.5 °C (from hexane); TLC  $R_f$  0.25 (hexane/EtOAc, 1:2).  $^1\text{H}$  NMR ( $\text{CDCl}_3$ , 400 MHz)  $\delta$  7.91 (s, 1H), 7.81-7.71 (m, 3H), 7.54 (dd,  $J = 8.5, 0.6$  Hz, 1H), 7.49-7.34 (m, 10H), 7.32 (d,  $J = 5.5$  Hz, 1H), 7.24 (dd,  $J = 7.5, 2.9$  Hz, 1H), 7.16 (dd,  $J = 5.5, 0.6$  Hz, 1H), 7.08 (d,  $J = 8.5$  Hz, 1H).  $^{13}\text{C}\{^1\text{H}\}$  NMR ( $\text{CDCl}_3$ , 100 MHz)  $\delta$  149.8 (d,  $^2J_{CP} = 21.5$  Hz, 1C), 143.8 (d,  $^2J_{CP} = 27.0$  Hz, 1C), 139.6 (1C), 139.2 (1C), 134.3 (d,  $^3J_{CP} = 15.2$  Hz, 1C), 134.2 (d,  $^1J_{CP} = 95.7$  Hz, 1C), 132.9 (d,  $^4J_{CP} = 1.7$  Hz, 1C), 132.2 (d,  $^4J_{CP} = 2.8$  Hz, 1C), 132.1 (d,  $^1J_{CP} = 105.7$  Hz, 1C), 130.9 (d,  $^2J_{CP} = 10.8$  Hz, 2C), 129.8 (d,  $^1J_{CP} = 100.2$  Hz, 1C), 129.2 (3C), 129.0 (3C), 128.93 (d,  $^2J_{CP} = 10.6$  Hz, 1C), 128.90 (d,  $^3J_{CP} = 12.4$  Hz, 2C), 128.7 (1C), 126.6 (1C), 125.2 (d,  $^3J_{CP} = 6.4$  Hz, 1C), 124.3 (1C), 124.2 (d,  $^3J_{CP} = 5.3$  Hz, 1C), 124.0 (d,  $^2J_{CP} = 10.8$  Hz, 1C), 122.2 (1C).  $^{31}\text{P}\{^1\text{H}\}$  NMR ( $\text{CDCl}_3$ , 162 MHz)  $\delta$  39.2; HRMS (APCI)  $m/z$  ( $[\text{M}+\text{H}]^+$ ) Calcd for  $\text{C}_{28}\text{H}_{20}\text{OPS}$ : 435.0967, Found: 435.0970.

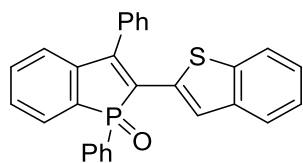

**2-(Benzo[*b*]thiophen-2-yl)-1,3-diphenylphosphindole 1-oxide (4aq):** yellow solid (0.2 mmol, 41.6 mg, 48% yield); m.p. 125.4-126.7 °C (from hexane); TLC  $R_f$  0.22 (hexane/EtOAc, 1:2).  $^1\text{H}$  NMR ( $\text{CDCl}_3$ , 400 MHz)  $\delta$  7.91-7.85 (m, 2H), 7.74 (s, 1H), 7.73-7.69 (m, 1H), 7.64-7.58 (m, 4H), 7.52-7.48 (m, 2H), 7.46-7.41 (m, 5H), 7.38-7.33 (m, 1H), 7.23-7.15 (m, 2H), 7.02 (dd,  $J = 7.5, 2.9$  Hz, 1H).  $^{13}\text{C}\{^1\text{H}\}$  NMR ( $\text{CDCl}_3$ , 100 MHz)  $\delta$  148.8 (d,  $^2J_{\text{CP}} = 20.2$  Hz, 1C), 144.2 (d,  $^2J_{\text{CP}} = 26.1$  Hz, 1C), 140.4 (1C), 138.8 (1C), 135.3 (d,  $^3J_{\text{CP}} = 14.8$  Hz, 1C), 133.7 (1C), 133.5 (1C), 133.2 (d,  $^4J_{\text{CP}} = 1.9$  Hz, 1C), 132.4 (d,  $^4J_{\text{CP}} = 2.8$  Hz, 1C), 131.5 (d,  $^1J_{\text{CP}} = 107.3$  Hz, 1C), 130.8 (d,  $^2J_{\text{CP}} = 10.6$  Hz, 2C), 130.1 (d,  $^1J_{\text{CP}} = 100.5$  Hz, 1C), 129.5 (1C), 129.4 (1C), 129.3 (2C), 129.2 (1C), 129.1 (d,  $^3J_{\text{CP}} = 12.6$  Hz, 2C), 128.96 (d,  $^1J_{\text{CP}} = 95.7$  Hz, 1C), 128.91 (d,  $^2J_{\text{CP}} = 10.1$  Hz, 1C), 126.6 (d,  $^3J_{\text{CP}} = 4.6$  Hz, 1C), 125.1 (1C), 124.3 (1C), 124.2 (d,  $^2J_{\text{CP}} = 10.4$  Hz, 1C), 124.1 (1C), 121.7 (1C).  $^{31}\text{P}\{^1\text{H}\}$  NMR ( $\text{CDCl}_3$ , 162 MHz)  $\delta$  38.7; HRMS (APCI)  $m/z$  ( $[\text{M}+\text{H}]^+$ ) Calcd for  $\text{C}_{28}\text{H}_{20}\text{OPS}$ : 435.0967, Found: 435.0968.

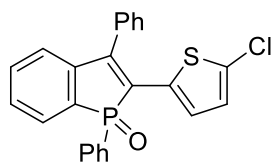

**2-(5-Chlorothiophen-2-yl)-1,3-diphenylphosphindole 1-oxide (4ar):** pale yellow solid (0.2 mmol, 35.9 mg, 43% yield); m.p. 175.8-177.1 °C (from hexane); TLC  $R_f$  0.25 (hexane/EtOAc, 1:2).  $^1\text{H}$  NMR ( $\text{CDCl}_3$ , 400 MHz)  $\delta$  7.85-7.80 (m, 2H), 7.68-7.64 (m, 1H), 7.60-7.51 (m, 4H), 7.48-7.42 (m, 3H), 7.40-7.30 (m, 3H), 7.20 (dd,  $J = 4.0, 1.0$  Hz, 1H), 6.96 (dd,  $J = 7.5, 2.9$  Hz, 1H), 6.65 (d,  $J = 4.0$  Hz, 1H).  $^{13}\text{C}\{^1\text{H}\}$  NMR ( $\text{CDCl}_3$ , 100 MHz)  $\delta$  146.5 (d,  $^2J_{\text{CP}} = 20.3$  Hz, 1C), 144.2 (d,  $^2J_{\text{CP}} = 25.8$  Hz, 1C), 134.2 (d,  $^3J_{\text{CP}} = 15.7$  Hz, 1C), 133.6 (1C), 133.3 (d,  $^4J_{\text{CP}} = 1.9$  Hz, 1C), 132.9 (d,  $^1J_{\text{CP}} = 98.3$  Hz, 1C), 132.5 (d,  $^4J_{\text{CP}} = 2.8$  Hz, 1C), 131.0 (d,  $^1J_{\text{CP}} = 107.3$  Hz, 1C), 130.8 (d,  $^2J_{\text{CP}} = 10.6$  Hz, 2C), 130.5 (1C), 130.0 (d,  $^1J_{\text{CP}} = 100.2$  Hz, 1C), 129.8 (1C), 129.6 (1C), 129.1 (d,  $^3J_{\text{CP}} = 12.4$  Hz, 2C), 129.0 (d,  $^3J_{\text{CP}} = 10.6$  Hz, 1C), 129.0 (1C), 128.9 (1C), 128.88 (2C), 128.85 (d,  $^2J_{\text{CP}} = 10.3$  Hz, 1C), 126.0 (1C), 123.9 (d,  $^2J_{\text{CP}} = 10.9$  Hz, 1C).  $^{31}\text{P}\{^1\text{H}\}$  NMR ( $\text{CDCl}_3$ , 162 MHz)  $\delta$  38.5; HRMS (APCI)  $m/z$  ( $[\text{M}+\text{H}]^+$ ) Calcd for  $\text{C}_{24}\text{H}_{17}\text{ClOPS}$ : 419.0421, Found: 419.0437.

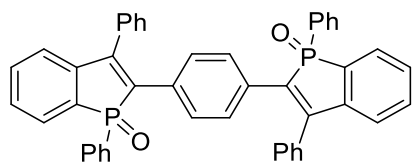

**2,2'-(1,4-Phenylene)bis(1,3-diphenylphosphindole 1-oxide) (4as, *syn* + *anti*, ca. 1:1 mixture):**

yellow solid (0.08 mmol scale, 28.7 mg, 53% yield); m.p. 267.6-268.6 °C (from hexane); TLC  $R_f$  0.20 (hexane/EtOAc, 1:3).  $^1\text{H}$  NMR ( $\text{CDCl}_3$ , 400 MHz)  $\delta$  7.71-7.62 (m, 6H), 7.51-7.45 (m, 2H), 7.43-7.31 (m, 14H), 7.23-7.19 (m, 4H), 7.15 (dd,  $J = 7.5, 2.9$  Hz, 2H), 6.93 (d,  $J = 10.7$  Hz, 4H).  $^{13}\text{C}\{^1\text{H}\}$  NMR ( $\text{CDCl}_3$ , 100 MHz)  $\delta$  150.2 (d,  $^2J_{\text{CP}} = 21.5$  Hz, 1C), 150.1 (d,  $^2J_{\text{CP}} = 21.3$  Hz, 1C), 143.7 (d,  $^2J_{\text{CP}} = 27.0$  Hz, 1C), 143.6 (d,  $^2J_{\text{CP}} = 27.0$  Hz, 1C), 134.1 (d,  $^3J_{\text{CP}} = 14.8$  Hz, 1C), 134.0 (d,  $^3J_{\text{CP}} = 14.8$  Hz, 1C), 133.6 (d,  $^1J_{\text{CP}} = 95.6$  Hz, 1C), 133.5 (d,  $^1J_{\text{CP}} = 95.6$  Hz, 1C), 132.9 (2H), 132.3 (d,  $^3J_{\text{CP}} = 4.7$  Hz, 1C), 132.2 (d,  $^3J_{\text{CP}} = 4.7$  Hz, 1C), 132.1 (d,  $^4J_{\text{CP}} = 2.7$  Hz, 2C), 132.0 (d,  $^1J_{\text{CP}} = 106.4$  Hz, 1C), 131.9 (d,  $^1J_{\text{CP}} = 106.4$  Hz, 1C), 130.9 (d,  $^2J_{\text{CP}} = 10.8$  Hz, 2C), 130.8 (d,  $^2J_{\text{CP}} = 10.8$  Hz, 2C), 129.97 (d,  $^1J_{\text{CP}} = 99.3$  Hz, 1C), 129.95 (d,  $^1J_{\text{CP}} = 99.3$  Hz, 1C), 129.2, 129.07, 129.05, 129.01, 128.9, 128.8, 128.79, 128.74, 124.1 (d,  $^2J_{\text{CP}} = 10.9$  Hz, 2C) (All observed signals are just shown because of complexity associated with C–P couplings and diastereomers.);  $^{31}\text{P}\{^1\text{H}\}$  NMR ( $\text{CDCl}_3$ , 162 MHz)  $\delta$  39.04, 38.97; HRMS (APCI)  $m/z$  ( $[\text{M}+\text{H}]^+$ ) Calcd for  $\text{C}_{46}\text{H}_{33}\text{O}_2\text{P}_2$ : 679.1951, Found: 679.1956.

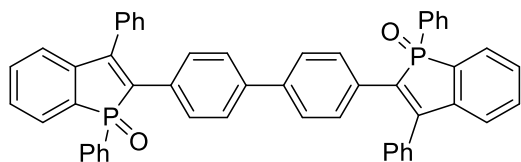

**2,2'--([1,1'-Biphenyl]-4,4'-diyl)bis(1,3-diphenylphosphindole 1-oxide) (4at, *syn* + *anti*, ca. 1:1 mixture):** yellow solid (0.08 mmol scale, 29.6 mg, 49% yield); m.p. 190.5-191.8 °C (from hexane); TLC  $R_f$  0.20 (hexane/EtOAc, 1:3).  $^1\text{H}$  NMR ( $\text{CDCl}_3$ , 400 MHz)  $\delta$  7.78-7.73 (m, 4H), 7.72-7.68 (m, 2H), 7.48-7.31 (m, 20H), 7.26-7.18 (m, 10H).  $^{13}\text{C}\{^1\text{H}\}$  NMR ( $\text{CDCl}_3$ , 100 MHz)  $\delta$  149.93 (d,  $^2J_{\text{CP}} = 21.5$  Hz, 1C), 149.91 (d,  $^2J_{\text{CP}} = 21.5$  Hz, 1C), 143.8 (d,  $^2J_{\text{CP}} = 26.8$  Hz, 2C), 139.4, 134.3 (d,  $^3J_{\text{CP}} = 15.1$  Hz, 2C), 133.71 (d,  $^1J_{\text{CP}} = 98.7$  Hz, 1C), 133.74 (d,  $^1J_{\text{CP}} = 93.8$  Hz, 1C), 132.9, 132.2, 132.0 (d,  $^1J_{\text{CP}} = 106.2$  Hz, 2C), 131.9 (d,  $^2J_{\text{CP}} = 9.9$  Hz, 2C), 130.9 (d,  $^2J_{\text{CP}} = 10.8$  Hz, 4C), 129.9 (d,  $^1J_{\text{CP}} = 99.8$  Hz, 2C), 129.4, 129.07, 129.01, 128.8, 128.7, 126.5, 124.1, 124.0, 123.99 (All observed signals are just shown because of complexity associated with C–P couplings and diastereomers.);  $^{31}\text{P}\{^1\text{H}\}$  NMR ( $\text{CDCl}_3$ , 162 MHz)  $\delta$  39.18, 39.15; HRMS (APCI)  $m/z$  ( $[\text{M}+\text{H}]^+$ ) Calcd for  $\text{C}_{52}\text{H}_{37}\text{O}_2\text{P}_2$ : 755.2264, Found: 755.2282.

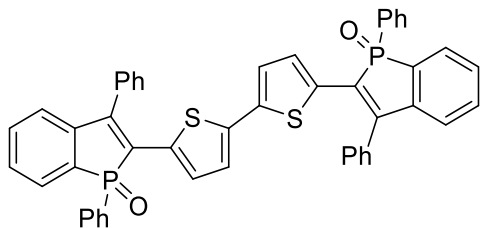

**2,2'--([2,2'-Bithiophene]-5,5'-diyl)bis(1,3-diphenylphosphindole 1-oxide) (4au, *syn* + *anti*, ca. 1:1 mixture):** dark orange solid (0.08 mmol scale, 42.2 mg, 69% yield); m.p. 179.8-181.1 °C (from hexane); TLC  $R_f$  0.20 (hexane/EtOAc, 1:3).  $^1\text{H}$  NMR ( $\text{CDCl}_3$ , 400 MHz)  $\delta$  7.82-7.77 (m, 4H), 7.64

(dd,  $J = 9.9, 7.1$  Hz, 2H), 7.56-7.54 (m, 6H), 7.52-7.47 (m, 2H), 7.44-7.27 (m, 12H), 7.21-7.19 (m, 2H), 6.95 (dt,  $J = 7.7, 1.4$  Hz, 2H), 6.65 (d,  $J = 4.0$  Hz, 1H), 6.63 (d,  $J = 4.0$  Hz, 1H).  $^{13}\text{C}\{^1\text{H}\}$  NMR ( $\text{CDCl}_3$ , 100 MHz)  $\delta$  146.4, 146.2, 144.6, 144.3, 138.7, 135.0, 134.8, 133.9, 133.7, 133.2, 132.4, 132.3, 131.7, 130.9, 130.8, 130.7, 130.65, 130.62, 130.5, 130.4, 129.7, 129.6, 129.4, 129.1, 129.0, 128.95, 128.90, 128.79, 128.07, 128.04, 123.85, 123.80, 123.7 (All observed signals are just shown because of complexity associated with C–P couplings and diastereomers.);  $^{31}\text{P}\{^1\text{H}\}$  NMR ( $\text{CDCl}_3$ , 162 MHz)  $\delta$  38.47, 38.41; HRMS (APCI)  $m/z$  ( $[\text{M}+\text{H}]^+$ ) Calcd for  $\text{C}_{48}\text{H}_{33}\text{O}_2\text{P}_2\text{S}_2$ : 767.1392, Found: 767.1388.

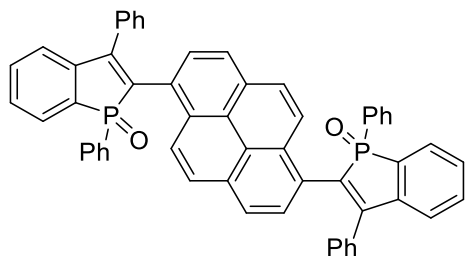

**2,2'-(Pyrene-1,6-diyl)bis(1,3-diphenylphosphindole 1-oxide) (4av, *syn* + *anti*, the ratio was not determined):** yellow solid (0.08 mmol scale, 23.1 mg, 36% yield); m.p. over 270 °C (from hexane); TLC  $R_f$  0.22 (hexane/EtOAc, 1:3).  $^1\text{H}$  NMR ( $\text{CDCl}_3$ , 400 MHz)  $\delta$  8.51 (bs, 2H), 7.86-7.30 (m, 23H), 7.20 (bs, 4H), 7.10 (bs, 7H).  $^{13}\text{C}\{^1\text{H}\}$  NMR ( $\text{CDCl}_3$ , 100 MHz)  $\delta$  152.5, 143.8, 143.6, 133.7, 133.5, 133.1, 132.7, 132.3, 131.7, 131.3, 131.2, 129.8, 129.7, 129.5, 129.4, 129.3, 128.8, 128.7, 128.6, 128.5, 128.4, 128.3, 127.7, 127.6, 127.5, 124.7, 124.4, 124.3 (All observed signals are just shown because of complexity associated with C–P couplings and diastereomers.);  $^{31}\text{P}\{^1\text{H}\}$  NMR ( $\text{CDCl}_3$ , 162 MHz)  $\delta$  39.1; HRMS (APCI)  $m/z$  ( $[\text{M}+\text{H}]^+$ ) Calcd for  $\text{C}_{56}\text{H}_{37}\text{O}_2\text{P}_2$ : 803.2264, Found: 803.2275.

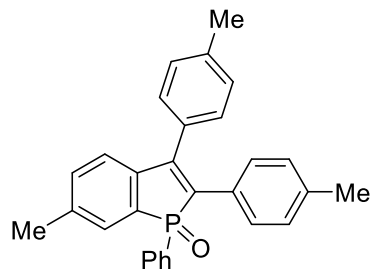

**6-Methyl-1-phenyl-2,3-di-*p*-tolylphosphindole 1-oxide (4ba):** colorless solid (0.2 mmol scale, 65.5 mg, 78% yield); m.p. 84.9-86.3 °C (from hexane); TLC  $R_f$  0.24 (hexane/EtOAc, 1:2).  $^1\text{H}$  NMR ( $\text{CDCl}_3$ , 400 MHz)  $\delta$  7.81-7.75 (m, 2H), 7.50-7.43 (m, 2H), 7.40-7.35 (m, 2H), 7.24-7.20 (m, 5H), 7.14 (d,  $J = 7.5$  Hz, 2H), 7.08 (dd,  $J = 7.8, 3.1$  Hz, 1H), 6.88 (d,  $J = 8.3$  Hz, 2H), 2.40 (s, 3H), 2.33 (s, 3H), 2.18 (s, 3H).  $^{13}\text{C}\{^1\text{H}\}$  NMR ( $\text{CDCl}_3$ , 100 MHz)  $\delta$  149.6 (d,  $^2J_{\text{CP}} = 22.0$  Hz, 1C), 141.4 (d,  $^2J_{\text{CP}} = 27.2$  Hz, 1C), 139.2 (d,  $^3J_{\text{CP}} = 10.4$  Hz, 1C), 138.4 (1C), 137.5 (1C), 133.2 (d,  $^4J_{\text{CP}} = 1.5$  Hz, 1C), 132.6 (d,  $^1J_{\text{CP}} = 96.9$  Hz, 1C), 132.2 (d,  $^1J_{\text{CP}} = 105.4$  Hz, 1C), 132.0 (d,  $^4J_{\text{CP}} = 2.8$  Hz, 1C), 131.6 (d,  $^3J_{\text{CP}} = 15.3$  Hz, 1C), 131.0 (d,  $^2J_{\text{CP}} = 10.5$  Hz, 2C), 130.5 (d,  $^1J_{\text{CP}} = 98.0$  Hz, 1C), 130.1 (1C), 129.7



(d,  $^2J_{CP} = 9.7$  Hz, 1C), 129.6 (2C), 129.0 (2C), 128.9 (2C), 128.89 (d,  $^3J_{CP} = 6.0$  Hz, 2C), 128.80 (d,  $^3J_{CP} = 12.1$  Hz, 2C), 123.8 (d,  $^2J_{CP} = 11.6$  Hz, 1C), 21.5 (1C), 21.26 (1C), 21.24 (1C).  $^{31}\text{P}\{^1\text{H}\}$  NMR ( $\text{CDCl}_3$ , 162 MHz)  $\delta$  39.2; HRMS (APCI)  $m/z$  ( $[\text{M}+\text{H}]^+$ ) Calcd for  $\text{C}_{29}\text{H}_{26}\text{OP}$ : 421.1716, Found: 421.1720.

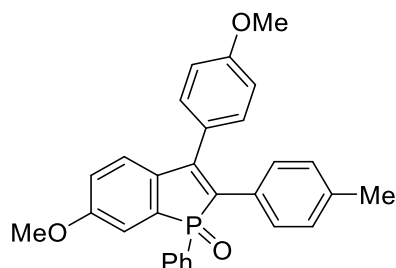

**6-Methoxy-3-(4-methoxyphenyl)-1-phenyl-2-(p-tolyl)phosphindole 1-oxide (4da):** colorless solid (0.2 mmol scale, 69.6 mg, 77% yield); m.p. 89.9-91.2 °C (from hexane); TLC  $R_f$  0.22 (hexane/EtOAc, 1:2).  $^1\text{H}$  NMR ( $\text{CDCl}_3$ , 400 MHz)  $\delta$  7.80-7.75 (m, 2H), 7.48-7.44 (m, 1H), 7.41-7.36 (m, 2H), 7.27-7.22 (m, 3H), 7.16 (dd,  $J = 8.5, 3.6$  Hz, 1H), 7.11 (d,  $J = 7.4$  Hz, 2H), 6.96-6.88 (m, 5H), 3.85 (s, 3H), 3.79 (s, 3H), 2.19 (s, 3H).  $^{13}\text{C}\{^1\text{H}\}$  NMR ( $\text{CDCl}_3$ , 100 MHz)  $\delta$  160.5 (d,  $^3J_{CP} = 13.4$  Hz, 1C), 159.7 (1C), 149.3 (d,  $^2J_{CP} = 21.3$  Hz, 1C), 137.2 (1C), 136.4 (d,  $^2J_{CP} = 27.0$  Hz, 1C), 134.2 (d,  $^1J_{CP} = 104.5$  Hz, 1C), 132.0 (d,  $^4J_{CP} = 2.7$  Hz, 1C), 131.2 (d,  $^1J_{CP} = 98.1$  Hz, 1C), 131.0 (d,  $^2J_{CP} = 10.7$  Hz, 2C), 130.4 (2C), 130.3 (d,  $^1J_{CP} = 99.1$  Hz, 1C), 130.1 (d,  $^2J_{CP} = 10.3$  Hz, 1C), 129.0 (2C), 128.83 (d,  $^3J_{CP} = 12.2$  Hz, 2C), 128.82 (d,  $^3J_{CP} = 5.9$  Hz, 2C), 126.7 (d,  $^3J_{CP} = 15.6$  Hz, 1C), 125.1 (d,  $^3J_{CP} = 12.8$  Hz, 1C), 117.8 (1C), 114.5 (d,  $^2J_{CP} = 10.6$  Hz, 1C), 114.3 (2C), 55.7 (1C), 55.3 (1C), 21.2 (1C).  $^{31}\text{P}\{^1\text{H}\}$  NMR ( $\text{CDCl}_3$ , 162 MHz)  $\delta$  38.7; HRMS (APCI)  $m/z$  ( $[\text{M}+\text{H}]^+$ ) Calcd for  $\text{C}_{29}\text{H}_{26}\text{O}_3\text{P}$ : 453.1615, Found: 453.1613.

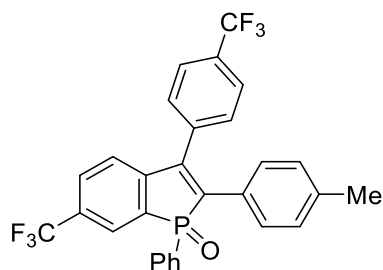

**1-Phenyl-2-(p-tolyl)-6-(trifluoromethyl)-3-(4-(trifluoromethyl)phenyl)phosphindole 1-oxide (4ea):** colorless solid (0.2 mmol scale, 53.8 mg, 51% yield); m.p. 151.3-152.6 °C (from hexane); TLC  $R_f$  0.25 (hexane/EtOAc, 1:2).  $^1\text{H}$  NMR ( $\text{CDCl}_3$ , 400 MHz)  $\delta$  7.95 (d,  $J = 9.7$  Hz, 1H), 7.79-7.70 (m, 5H), 7.56-7.42 (m, 5H), 7.23 (dd,  $J = 8.0, 2.7$  Hz, 1H), 7.13 (d,  $J = 8.2$  Hz, 2H), 6.94 (d,  $J = 8.2$  Hz, 2H), 2.22 (s, 3H).  $^{13}\text{C}\{^1\text{H}\}$  NMR ( $\text{CDCl}_3$ , 100 MHz)  $\delta$  146.6, 146.4, 146.3, 146.1, 139.1, 138.7, 137.8, 137.7, 133.6, 132.84, 132.81, 132.5, 131.2, 131.1, 131.0, 130.95, 130.93, 130.8, 130.34, 130.32, 130.30, 129.5, 129.4, 129.3, 129.1, 128.9, 128.8, 128.6, 128.5, 127.8, 126.33, 126.30, 126.2, 126.1,

126.06, 126.03, 125.2, 124.9, 123.7, 123.6, 122.5, 21.3. (All observed signals are just shown because of complexity associated with C–F and C–P couplings.);  $^{19}\text{F}\{^1\text{H}\}$  NMR ( $\text{CDCl}_3$ , 376 MHz)  $\delta$  -62.6, -62.7.  $^{31}\text{P}\{^1\text{H}\}$  NMR ( $\text{CDCl}_3$ , 162 MHz)  $\delta$  37.9; HRMS (APCI)  $m/z$  ( $[\text{M}+\text{H}]^+$ ) Calcd for  $\text{C}_{29}\text{H}_{20}\text{F}_6\text{OP}$ : 529.1151, Found: 529.1154.

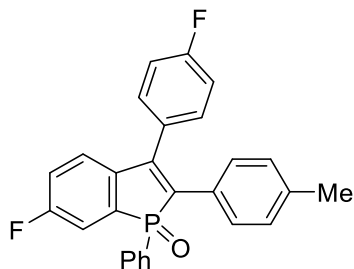

**6-Fluoro-3-(4-fluorophenyl)-1-phenyl-2-(*p*-tolyl)phosphindole 1-oxide (4fa):** pale yellow solid (0.2 mmol scale, 60.7 mg, 71% yield); m.p. 218.1-219.4 °C (from hexane); TLC  $R_f$  0.25 (hexane/EtOAc, 1:2).  $^1\text{H}$  NMR ( $\text{CDCl}_3$ , 400 MHz)  $\delta$  7.78-7.73 (m, 2H), 7.53-7.48 (m, 1H), 7.43-7.37 (m, 3H), 7.33-7.29 (m, 2H), 7.17-7.09 (m, 6H), 6.92 (d,  $J = 8.5$  Hz, 2H), 2.21 (s, 3H).  $^{13}\text{C}\{^1\text{H}\}$  NMR ( $\text{CDCl}_3$ , 100 MHz)  $\delta$  164.6, 164.5, 164.1, 162.1, 162.0, 161.6, 147.66, 147.65, 147.45, 147.44, 139.64, 139.62, 139.38, 139.35, 138.1, 135.38, 135.31, 134.9, 134.3, 134.27, 133.9, 132.5, 132.48, 131.3, 131.2, 131.0, 130.9, 130.89, 130.84, 130.6, 130.2, 130.17, 130.05, 130.01, 129.7, 129.4, 129.3, 129.2, 129.1, 129.0, 128.8, 128.7, 128.6, 128.4, 125.4, 125.3, 125.2, 125.1, 119.5, 119.3, 117.0, 116.9, 116.7, 116.6, 116.5, 116.2, 21.2 (All observed signals are just shown because of complexity associated with C–F and C–P couplings.);  $^{19}\text{F}\{^1\text{H}\}$  NMR ( $\text{CDCl}_3$ , 376 MHz)  $\delta$  -111.1 (d,  $J_{\text{FP}} = 5.3$  Hz, 1F), -111.7.  $^{31}\text{P}\{^1\text{H}\}$  NMR ( $\text{CDCl}_3$ , 162 MHz)  $\delta$  37.7 (d,  $J_{\text{PF}} = 5.3$  Hz); HRMS (APCI)  $m/z$  ( $[\text{M}+\text{H}]^+$ ) Calcd for  $\text{C}_{27}\text{H}_{20}\text{F}_2\text{OP}$ : 429.1215, Found: 429.1229.

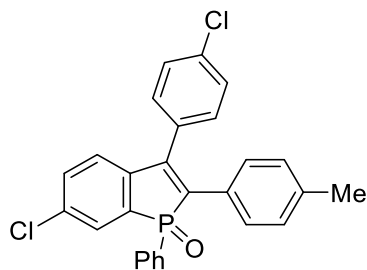

**6-Chloro-3-(4-chlorophenyl)-1-phenyl-2-(*p*-tolyl)phosphindole 1-oxide (4ga):** pale yellow solid (0.2 mmol scale, 60.7 mg, 66% yield); m.p. 107.2-108.6 °C (from hexane); TLC  $R_f$  0.25 (hexane/EtOAc, 1:2).  $^1\text{H}$  NMR ( $\text{CDCl}_3$ , 400 MHz)  $\delta$  7.77-7.72 (m, 2H), 7.64 (dd,  $J = 9.8, 2.0$  Hz, 1H), 7.53-7.48 (m, 1H), 7.44-7.39 (m, 5H), 7.26 (d,  $J = 8.1$  Hz, 2H), 7.11 (d,  $J = 7.8$  Hz, 2H), 7.09 (dd,  $J = 8.1, 3.3$  Hz, 1H), 6.92 (d,  $J = 8.1$  Hz, 2H), 2.21 (s, 3H).  $^{13}\text{C}\{^1\text{H}\}$  NMR ( $\text{CDCl}_3$ , 100 MHz)  $\delta$  147.1 (d,  $^2J_{\text{CP}} = 21.1$  Hz, 1C), 141.7 (d,  $^2J_{\text{CP}} = 26.5$  Hz, 1C), 138.4 (1C), 135.5 (d,  $^3J_{\text{CP}} = 13.6$  Hz, 1C), 135.0 (d,  $^1J_{\text{CP}} = 95.6$  Hz, 1C), 134.9 (1C), 134.2 (d,  $^1J_{\text{CP}} = 103.3$  Hz, 1C), 132.8 (d,  $^4J_{\text{CP}} = 1.2$

Hz, 1C), 132.6 (d,  $^4J_{CP} = 2.5$  Hz, 1C), 132.4 (1C), 130.9 (d,  $^2J_{CP} = 10.7$  Hz, 2C), 130.4 (2C), 129.5 (2C), 129.4 (d,  $^2J_{CP} = 10.0$  Hz, 1C), 129.3 (2C), 129.2 (d,  $^3J_{CP} = 15.3$  Hz, 1C), 129.1 (d,  $^3J_{CP} = 12.2$  Hz, 2C), 128.9 (d,  $^1J_{CP} = 100.8$  Hz, 1C), 128.8 (d,  $^3J_{CP} = 5.9$  Hz, 2C), 124.7 (d,  $^2J_{CP} = 11.7$  Hz, 1C), 21.3 (1C).  $^{31}\text{P}\{^1\text{H}\}$  NMR ( $\text{CDCl}_3$ , 162 MHz)  $\delta$  38.0; HRMS (APCI)  $m/z$  ( $[\text{M}+\text{H}]^+$ ) Calcd for  $\text{C}_{27}\text{H}_{20}\text{Cl}_2\text{OP}$ : 461.0629, Found: 461.0657.

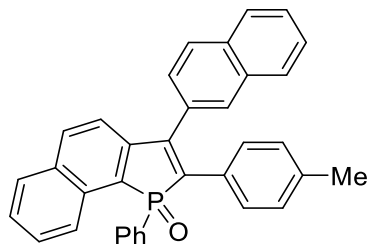

**3-(Naphthalen-2-yl)-1-phenyl-2-(*p*-tolyl)benzo[*g*]phosphindole 1-oxide (4ha):** yellow solid (0.2 mmol scale, 64.9 mg, 66% yield); m.p. 135.3-136.6 °C (from hexane); TLC  $R_f$  0.20 (hexane/EtOAc, 1:2).  $^1\text{H}$  NMR ( $\text{CDCl}_3$ , 400 MHz)  $\delta$  8.13 (dd,  $J = 8.2, 0.5$  Hz, 1H), 7.93-7.85 (m, 7H), 7.81 (d,  $J = 7.9$  Hz, 1H), 7.58-7.51 (m, 2H), 7.50-7.33 (m, 7H), 7.23 (d,  $J = 7.9$  Hz, 2H), 6.86 (d,  $J = 8.4$  Hz, 2H), 2.16 (s, 3H).  $^{13}\text{C}\{^1\text{H}\}$  NMR ( $\text{CDCl}_3$ , 100 MHz)  $\delta$  148.5 (d,  $^2J_{CP} = 23.2$  Hz, 1C), 143.3 (d,  $^2J_{CP} = 26.2$  Hz, 1C), 137.9 (1C), 135.0 (d,  $^1J_{CP} = 95.6$  Hz, 1C), 133.6 (d,  $^4J_{CP} = 2.1$  Hz, 1C), 133.5 (d,  $^3J_{CP} = 7.9$  Hz, 1C), 133.4 (1C), 133.2 (1C), 132.3 (d,  $^3J_{CP} = 15.7$  Hz, 1C), 132.1 (d,  $^4J_{CP} = 2.7$  Hz, 1C), 131.8 (d,  $^2J_{CP} = 9.2$  Hz, 1C), 130.9 (d,  $^2J_{CP} = 10.4$  Hz, 2C), 129.6 (d,  $^2J_{CP} = 10.6$  Hz, 1C), 129.4 (d,  $^1J_{CP} = 95.1$  Hz, 1C), 129.1 (1C), 129.08 (1C), 129.07 (d,  $^3J_{CP} = 12.5$  Hz, 2C), 129.02 (d,  $^3J_{CP} = 6.1$  Hz, 2C), 128.9 (1C), 128.7 (d,  $^4J_{CP} = 1.5$  Hz, 1C), 128.5 (1C), 128.3 (1C), 128.2 (1C), 128.0 (1C), 127.4 (d,  $^1J_{CP} = 102.2$  Hz, 1C), 126.9 (1C), 126.76 (1C), 126.75 (1C), 126.6 (1C), 125.7 (d,  $^3J_{CP} = 4.9$  Hz, 1C), 121.3 (d,  $^3J_{CP} = 12.5$  Hz, 1C), 21.3 (1C).  $^{31}\text{P}\{^1\text{H}\}$  NMR ( $\text{CDCl}_3$ , 162 MHz)  $\delta$  39.9; HRMS (APCI)  $m/z$  ( $[\text{M}+\text{H}]^+$ ) Calcd for  $\text{C}_{35}\text{H}_{26}\text{OP}$ : 493.1716, Found: 493.1723.

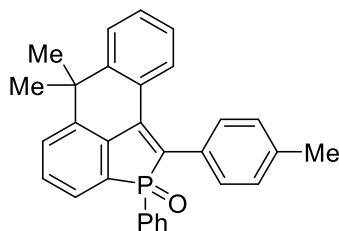

**6,6-Dimethyl-2-phenyl-1-(*p*-tolyl)-6*H*-naphtho[1,2,3-*cd*]phosphindole 2-oxide (4ia):** colorless solid (0.2 mmol scale, 54.4 mg, 63% yield); m.p. 131.3-132.6 °C (from hexane); TLC  $R_f$  0.22 (hexane/EtOAc, 1:2).  $^1\text{H}$  NMR ( $\text{CDCl}_3$ , 400 MHz)  $\delta$  7.71 (d,  $J = 8.0$  Hz, 1H), 7.67-7.57 (m, 5H), 7.48-7.42 (m, 2H), 7.39-7.33 (m, 3H), 7.12 (bs, 4H), 6.96 (td,  $J = 7.5, 1.2$  Hz, 1H), 2.33 (d,  $J = 1.1$  Hz, 3H), 1.77 (s, 3H), 1.72 (s, 3H).  $^{13}\text{C}\{^1\text{H}\}$  NMR ( $\text{CDCl}_3$ , 100 MHz)  $\delta$  146.9 (1C), 141.5 (d,  $^3J_{CP} = 11.6$  Hz, 1C), 139.0 (d,  $^2J_{CP} = 23.2$  Hz, 1C), 137.7 (d,  $^4J_{CP} = 2.1$  Hz, 1C), 137.4 (d,  $^2J_{CP} = 29.3$  Hz, 1C), 132.0 (d,  $^4J_{CP} = 2.7$  Hz, 1C), 131.3 (d,  $^2J_{CP} = 10.8$  Hz, 2C), 131.28 (1C), 130.8 (d,  $^1J_{CP} = 98.9$

Hz, 1C), 130.5 (d,  $^4J_{CP} = 1.6$  Hz, 1C), 130.4 (1C), 130.3 (d,  $^1J_{CP} = 103.9$  Hz, 1C), 130.0 (2C), 128.9 (d,  $^1J_{CP} = 100.7$  Hz, 1C), 129.5 (d,  $^3J_{CP} = 11.1$  Hz, 1C), 128.6 (d,  $^3J_{CP} = 12.2$  Hz, 2C), 128.5 (1C), 128.4 (1C), 128.3 (1C), 127.5 (1C), 127.4 (d,  $^2J_{CP} = 9.0$  Hz, 1C), 127.2 (d,  $^2J_{CP} = 17.0$  Hz, 1C), 125.9 (1C), 38.6 (d,  $^4J_{CP} = 1.1$  Hz, 1C), 33.4 (1C), 33.0 (1C), 21.4 (1C).  $^{31}\text{P}\{^1\text{H}\}$  NMR ( $\text{CDCl}_3$ , 162 MHz)  $\delta$  39.8; HRMS (APCI)  $m/z$  ( $[\text{M}+\text{H}]^+$ ) Calcd for  $\text{C}_{30}\text{H}_{26}\text{OP}$ : 433.1716, Found: 433.1738.

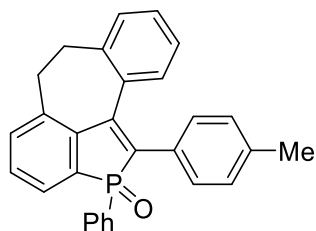

**6-Phenyl-5-(*p*-tolyl)-10,11-dihydrobenzo[6,7]cyclohepta[1,2,3-*cd*]phosphindole 6-oxide (4ja):** colorless solid (0.2 mmol scale, 46.0 mg, 55% yield); m.p. 126.4-127.7 °C (from hexane); TLC  $R_f$  0.24 (hexane/EtOAc, 1:2).  $^1\text{H}$  NMR ( $\text{CDCl}_3$ , 400 MHz)  $\delta$  7.72 (bs, 2H), 7.53 (ddd,  $J = 10.2, 6.4, 1.7$  Hz, 1H), 7.43-7.36 (m, 3H), 7.25-7.18 (m, 7H), 6.93-6.87 (m, 3H), 3.20-3.07 (m, 4H), 2.21 (s, 3H).  $^{13}\text{C}\{^1\text{H}\}$  NMR ( $\text{CDCl}_3$ , 100 MHz)  $\delta$  150.1 (d,  $^2J_{CP} = 19.5$  Hz, 1C), 143.3 (1C), 140.2 (d,  $^2J_{CP} = 28.2$  Hz, 1C), 139.5 (d,  $^3J_{CP} = 10.6$  Hz, 1C), 137.6 (1C), 135.6 (d,  $^4J_{CP} = 1.5$  Hz, 1C), 134.1 (d,  $^3J_{CP} = 15.0$  Hz, 1C), 133.2 (1C), 131.9 (d,  $^4J_{CP} = 2.5$  Hz, 1C), 131.4 (d,  $^1J_{CP} = 93.9$  Hz, 1C), 131.3 (d,  $^2J_{CP} = 8.7$  Hz, 1C), 131.0 (d,  $^2J_{CP} = 10.3$  Hz, 2C), 130.3 (d,  $^1J_{CP} = 102.5$  Hz, 1C), 129.8 (1C), 129.3 (d,  $^3J_{CP} = 5.4$  Hz, 2C), 129.2 (2C), 128.8 (d,  $^3J_{CP} = 11.9$  Hz, 2C), 128.3 (1C), 128.1 (d,  $^3J_{CP} = 11.5$  Hz, 1C), 127.5 (d,  $^1J_{CP} = 98.5$  Hz, 1C), 126.9 (d,  $^2J_{CP} = 9.6$  Hz, 1C), 125.8 (1C), 35.4 (1C), 34.7 (1C), 21.3 (1C).  $^{31}\text{P}\{^1\text{H}\}$  NMR ( $\text{CDCl}_3$ , 162 MHz)  $\delta$  35.5; HRMS (APCI)  $m/z$  ( $[\text{M}+\text{H}]^+$ ) Calcd for  $\text{C}_{29}\text{H}_{24}\text{OP}$ : 419.1560, Found: 419.1562.

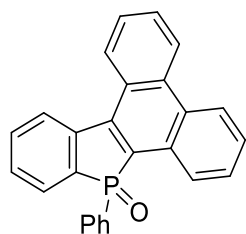

**9-Phenyltribenzo[*b,e,g*]phosphindole 9-oxide (5aa):** colorless solid (0.2 mmol scale, 56.3 mg, 75% yield); TLC  $R_f$  0.28 (hexane/EtOAc, 1:2).  $^1\text{H}$  NMR ( $\text{CDCl}_3$ , 400 MHz)  $\delta$  8.97-8.95 (m, 1H), 8.80-8.78 (m, 1H), 8.64 (d,  $J = 8.5$  Hz, 1H), 8.51 (dd,  $J = 8.0, 3.5$  Hz, 1H), 8.31 (d,  $J = 8.0$  Hz, 1H), 7.85-7.72 (m, 5H), 7.68-7.60 (m, 2H), 7.56-7.52 (m, 1H), 7.46-7.40 (m, 2H), 7.36-7.32 (m, 2H).  $^{13}\text{C}\{^1\text{H}\}$  NMR ( $\text{CDCl}_3$ , 100 MHz)  $\delta$  142.5 (d,  $^2J_{CP} = 23.4$  Hz, 1C), 139.5 (d,  $^2J_{CP} = 20.0$  Hz, 1C), 134.6 (d,  $^1J_{CP} = 106.5$  Hz, 1C), 133.9 (d,  $^4J_{CP} = 1.9$  Hz, 1C), 133.1 (d,  $^4J_{CP} = 2.0$  Hz, 1C), 132.2 (d,  $^4J_{CP} = 2.8$  Hz, 1C), 131.1 (d,  $^2J_{CP} = 10.8$  Hz, 2C), 130.8 (d,  $^1J_{CP} = 102.1$  Hz, 1C), 130.6 (d,  $^3J_{CP} = 14.4$  Hz, 1C), 130.09 (d,  $^3J_{CP} = 9.9$  Hz, 1C), 130.05 (d,  $^1J_{CP} = 108.8$  Hz, 1C), 129.3 (d,  $^2J_{CP} = 8.9$  Hz, 1C), 128.9 (d,

$^3J_{CP} = 11.4$  Hz, 1C), 128.8 (d,  $^3J_{CP} = 12.5$  Hz, 2C), 128.6 (1C), 128.0 (1C), 127.9 (d,  $^3J_{CP} = 13.9$  Hz, 1C), 127.8 (1C), 127.4 (1C), 127.0 (d,  $^3J_{CP} = 5.4$  Hz, 1C), 125.9 (1C), 125.6 (d,  $^2J_{CP} = 10.9$  Hz, 1C), 124.1 (1C), 123.1 (1C).  $^{31}\text{P}\{^1\text{H}\}$  NMR ( $\text{CDCl}_3$ , 162 MHz)  $\delta$  34.0; HRMS (APCI)  $m/z$  ( $[\text{M}+\text{H}]^+$ ) Calcd for  $\text{C}_{26}\text{H}_{18}\text{OP}$ : 377.1089, Found: 377.1091.

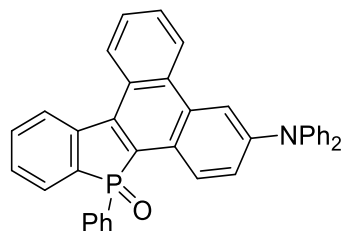

**6-(Diphenylamino)-9-phenyltribenzo[*b,e,g*]phosphindole 9-oxide (5ab):** yellow solid (0.2 mmol scale, 64.1 mg, 59% yield); m.p. 225.9-226.9 °C (from hexane); TLC  $R_f$  0.20 (hexane/EtOAc, 1:2).  $^1\text{H}$  NMR ( $\text{CDCl}_3$ , 400 MHz)  $\delta$  8.93 (d,  $J = 7.8$  Hz, 1H), 8.48 (dd,  $J = 8.0, 3.4$  Hz, 1H), 8.41 (d,  $J = 7.8$  Hz, 1H), 8.25 (s, 1H), 8.12 (d,  $J = 8.8$  Hz, 1H), 7.82-7.70 (m, 4H), 7.68-7.63 (m, 2H), 7.48-7.34 (m, 4H), 7.30-7.25 (m, 5H), 7.17-7.15 (m, 4H), 7.08 (t,  $J = 7.3$  Hz, 2H).  $^{13}\text{C}\{^1\text{H}\}$  NMR ( $\text{CDCl}_3$ , 100 MHz)  $\delta$  147.6 (1C), 147.3 (2C), 142.9 (d,  $^2J_{CP} = 23.5$  Hz, 1C), 137.1 (d,  $^2J_{CP} = 20.0$  Hz, 1C), 134.4 (d,  $^1J_{CP} = 106.5$  Hz, 1C), 133.1 (d,  $^4J_{CP} = 2.5$  Hz, 1C), 132.1 (d,  $^4J_{CP} = 2.9$  Hz, 1C), 132.0 (d,  $^3J_{CP} = 9.5$  Hz, 1C), 131.1 (d,  $^2J_{CP} = 10.8$  Hz, 2C), 130.9 (d,  $^1J_{CP} = 102.0$  Hz, 1C), 130.1 (d,  $^3J_{CP} = 9.7$  Hz, 1C), 130.0 (d,  $^1J_{CP} = 102.2$  Hz, 1C), 129.5 (4C), 128.8 (d,  $^3J_{CP} = 11.4$  Hz, 1C), 128.8 (d,  $^3J_{CP} = 12.5$  Hz, 2C), 128.5 (1C), 128.4 (d,  $^4J_{CP} = 2.7$  Hz, 1C), 128.1 (1C), 127.8 (d,  $^3J_{CP} = 5.6$  Hz, 1C), 127.4 (1C), 125.6 (1C), 125.2 (d,  $^2J_{CP} = 10.9$  Hz, 1C), 125.0 (4C), 124.7 (d,  $^2J_{CP} = 8.9$  Hz, 1C), 124.6 (1C), 124.2 (1C), 123.7 (2C), 115.2 (1C).  $^{31}\text{P}\{^1\text{H}\}$  NMR ( $\text{CDCl}_3$ , 162 MHz)  $\delta$  34.0; HRMS (APCI)  $m/z$  ( $[\text{M}+\text{H}]^+$ ) Calcd for  $\text{C}_{38}\text{H}_{27}\text{NOP}$ : 544.1825, Found: 544.1853.

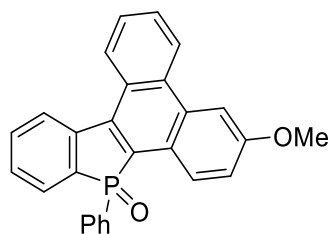

**6-Methoxy-9-phenyltribenzo[*b,e,g*]phosphindole 9-oxide (5ac):** yellow solid (0.2 mmol scale, 53.6 mg, 66% yield); m.p. 215.3-216.3 °C (from hexane); TLC  $R_f$  0.24 (hexane/EtOAc, 1:2).  $^1\text{H}$  NMR ( $\text{CDCl}_3$ , 400 MHz)  $\delta$  8.94 (dd,  $J = 5.2, 4.1$  Hz, 1H), 8.70 (dd,  $J = 5.2, 4.1$  Hz, 1H), 8.47 (dd,  $J = 7.8, 3.4$  Hz, 1H), 8.23 (d,  $J = 8.9$  Hz, 1H), 8.00 (s, 1H), 7.83-7.70 (m, 5H), 7.64 (t,  $J = 7.8$  Hz, 1H), 7.46-7.32 (m, 4H), 7.19 (dd,  $J = 8.9, 2.4$  Hz, 1H), 3.96 (s, 3H).  $^{13}\text{C}\{^1\text{H}\}$  NMR ( $\text{CDCl}_3$ , 100 MHz)  $\delta$  159.3 (1C), 142.8 (d,  $^2J_{CP} = 22.9$  Hz, 1C), 136.8 (d,  $^2J_{CP} = 20.0$  Hz, 1C), 134.3 (d,  $^1J_{CP} = 106.5$  Hz, 1C), 133.2 (d,  $^4J_{CP} = 1.9$  Hz, 1C), 133.1 (d,  $^4J_{CP} = 1.9$  Hz, 1C), 132.4 (d,  $^2J_{CP} = 8.6$  Hz, 1C), 132.1 (d,  $^4J_{CP} = 2.8$  Hz, 1C), 131.05 (d,  $^2J_{CP} = 10.9$  Hz, 2C), 131.03 (d,  $^1J_{CP} = 102.1$  Hz, 1C), 130.02 (d,  $^3J_{CP} = 9.7$

Hz, 1C), 130.0 (d,  $^1J_{CP} = 102.8$  Hz, 1C), 128.8 (d,  $^3J_{CP} = 12.5$  Hz, 2C), 128.5 (d,  $^3J_{CP} = 5.6$  Hz, 1C), 128.4 (d,  $^3J_{CP} = 10.8$  Hz, 1C), 128.3 (d,  $^3J_{CP} = 12.1$  Hz, 1C), 128.1 (1C), 127.5 (1C), 125.7 (1C), 125.2 (d,  $^2J_{CP} = 10.9$  Hz, 1C), 124.1 (1C), 123.9 (d,  $^3J_{CP} = 9.2$  Hz, 1C), 117.9 (1C), 104.7 (1C), 55.5 (1C).  $^{31}\text{P}\{^1\text{H}\}$  NMR ( $\text{CDCl}_3$ , 162 MHz)  $\delta$  34.0; HRMS (APCI)  $m/z$  ( $[\text{M}+\text{H}]^+$ ) Calcd for  $\text{C}_{27}\text{H}_{20}\text{O}_2\text{P}$ : 407.1196, Found: 407.1182.

[ $^1\text{H}$ ,  $^{13}\text{C}\{^1\text{H}\}$ , and  $^{31}\text{P}\{^1\text{H}\}$  NMR Spectra of **2a**]

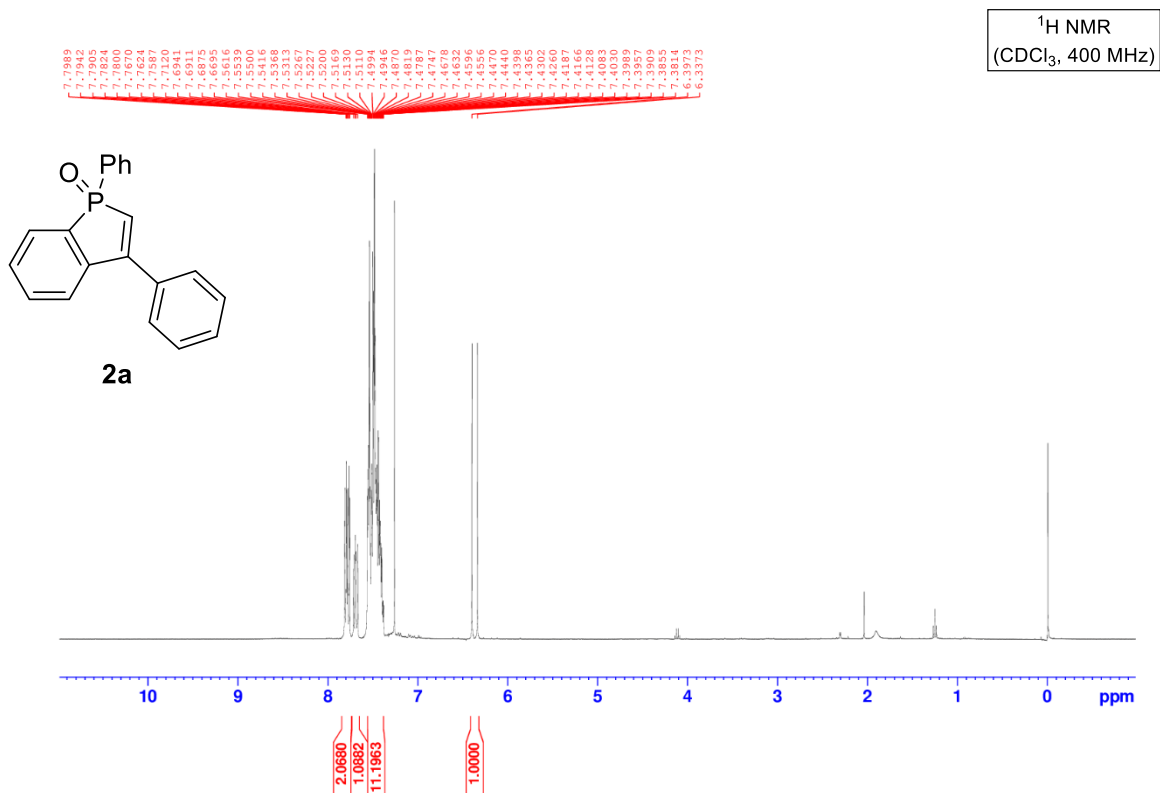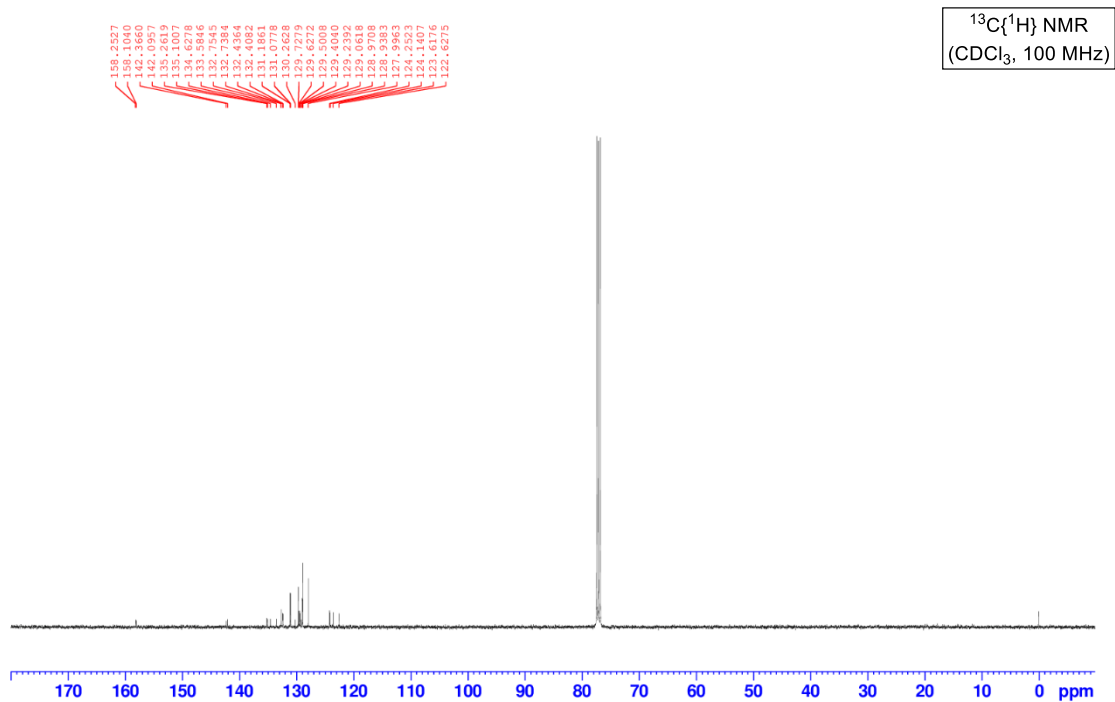

$^{31}\text{P}\{^1\text{H}\}$  NMR  
( $\text{CDCl}_3$ , 162 MHz)

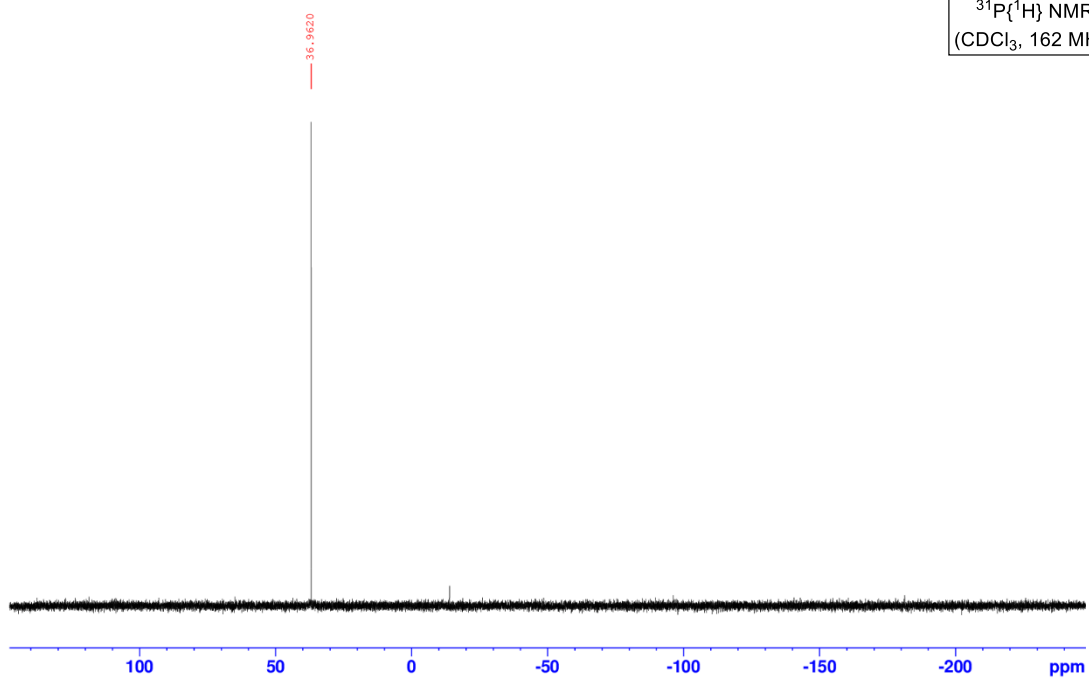



[ $^1\text{H}$ ,  $^{13}\text{C}\{^1\text{H}\}$ , and  $^{31}\text{P}\{^1\text{H}\}$  NMR Spectra of **2b**]

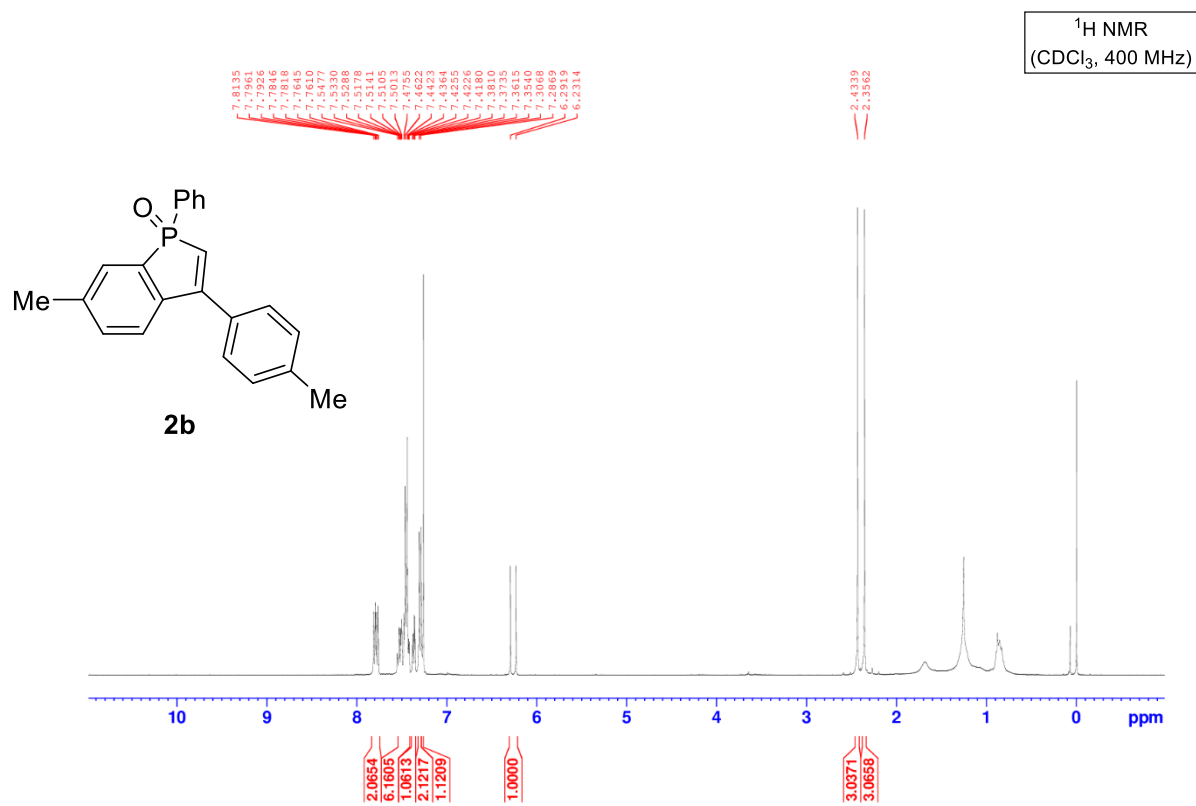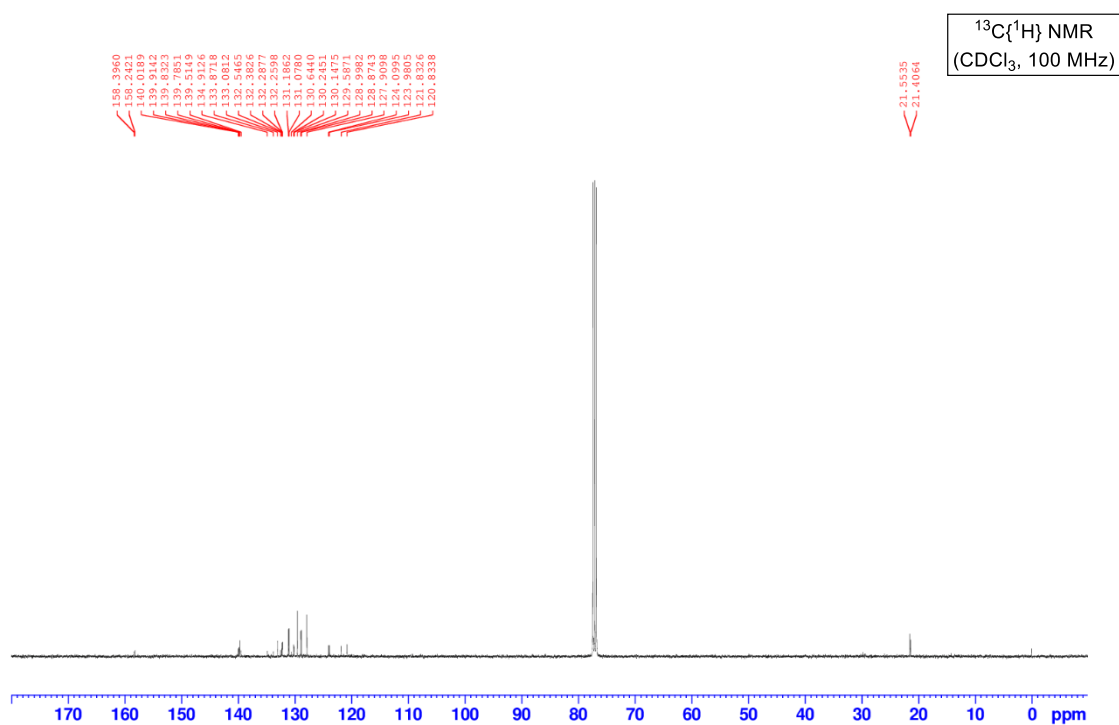

$^{31}\text{P}\{^1\text{H}\}$  NMR  
( $\text{CDCl}_3$ , 162 MHz)

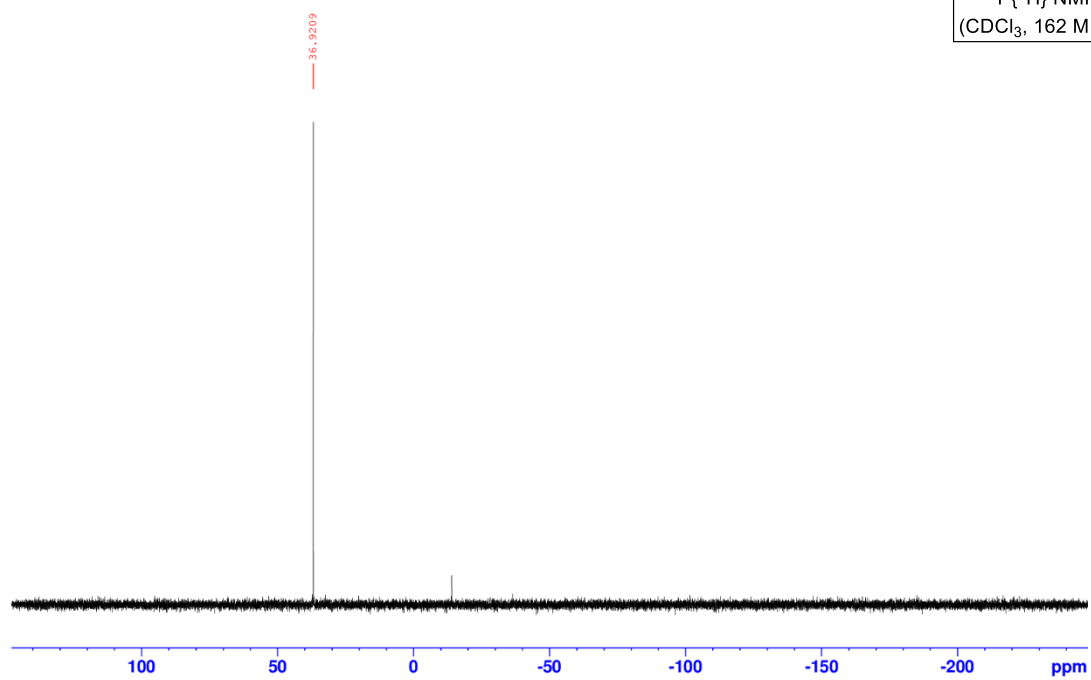

[ $^1\text{H}$ ,  $^{13}\text{C}\{^1\text{H}\}$ , and  $^{31}\text{P}\{^1\text{H}\}$  NMR Spectra of **2c**]

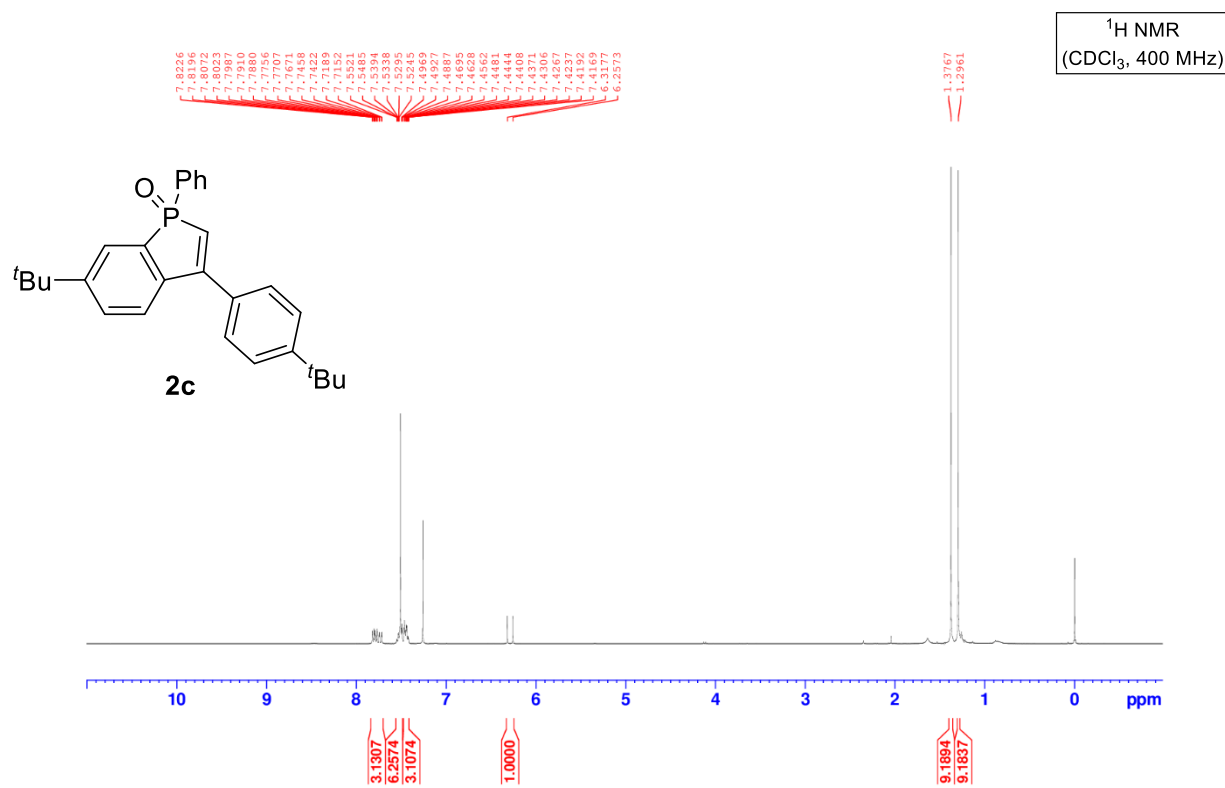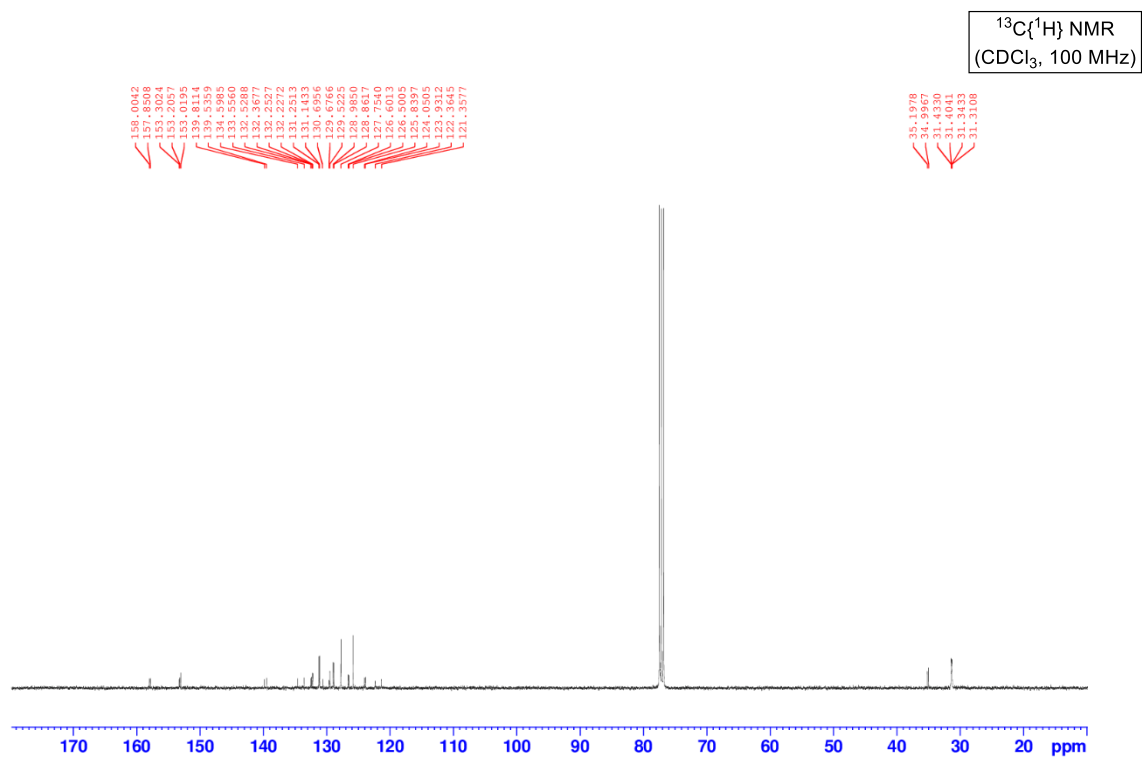

$^{31}\text{P}\{^1\text{H}\}$  NMR  
( $\text{CDCl}_3$ , 162 MHz)

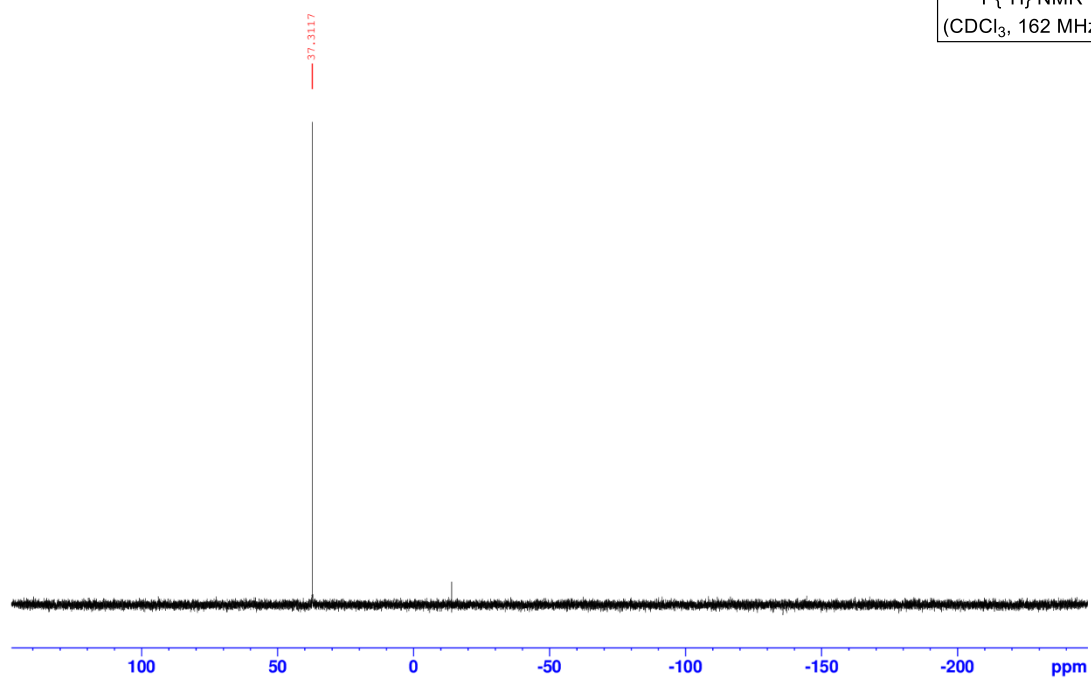

[<sup>1</sup>H, <sup>13</sup>C{<sup>1</sup>H}, and <sup>31</sup>P{<sup>1</sup>H} NMR of **2d**]

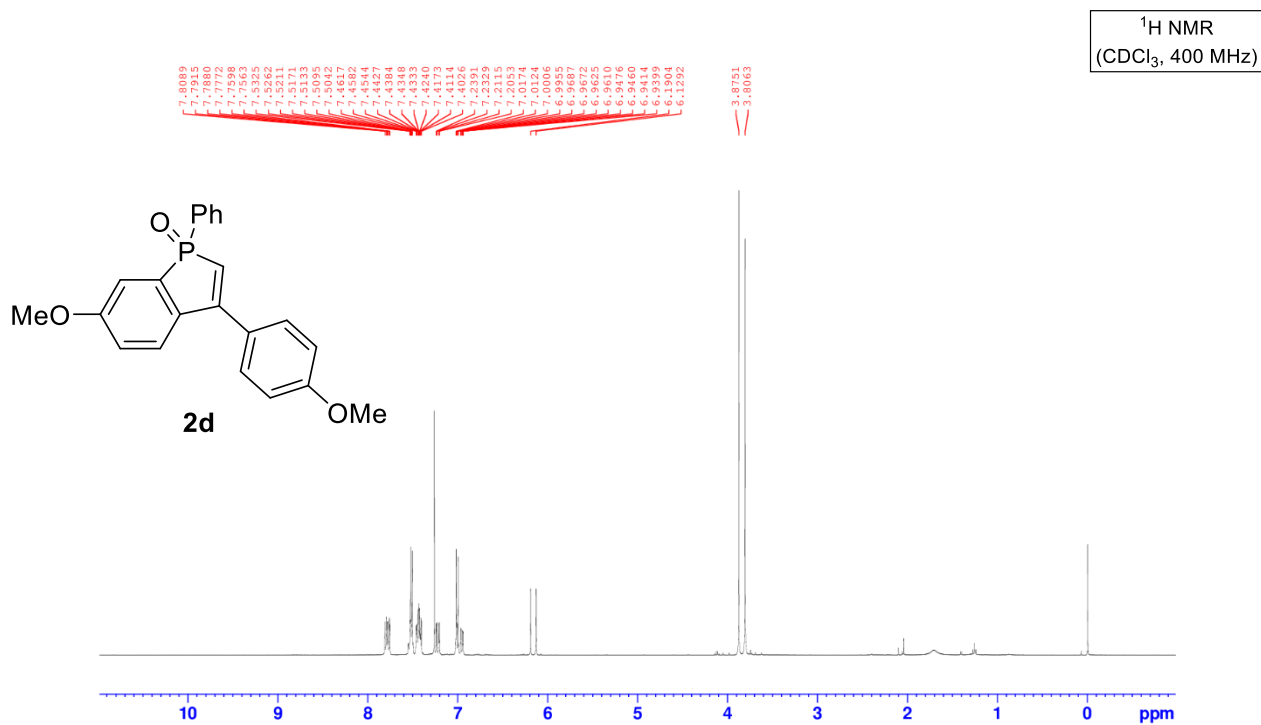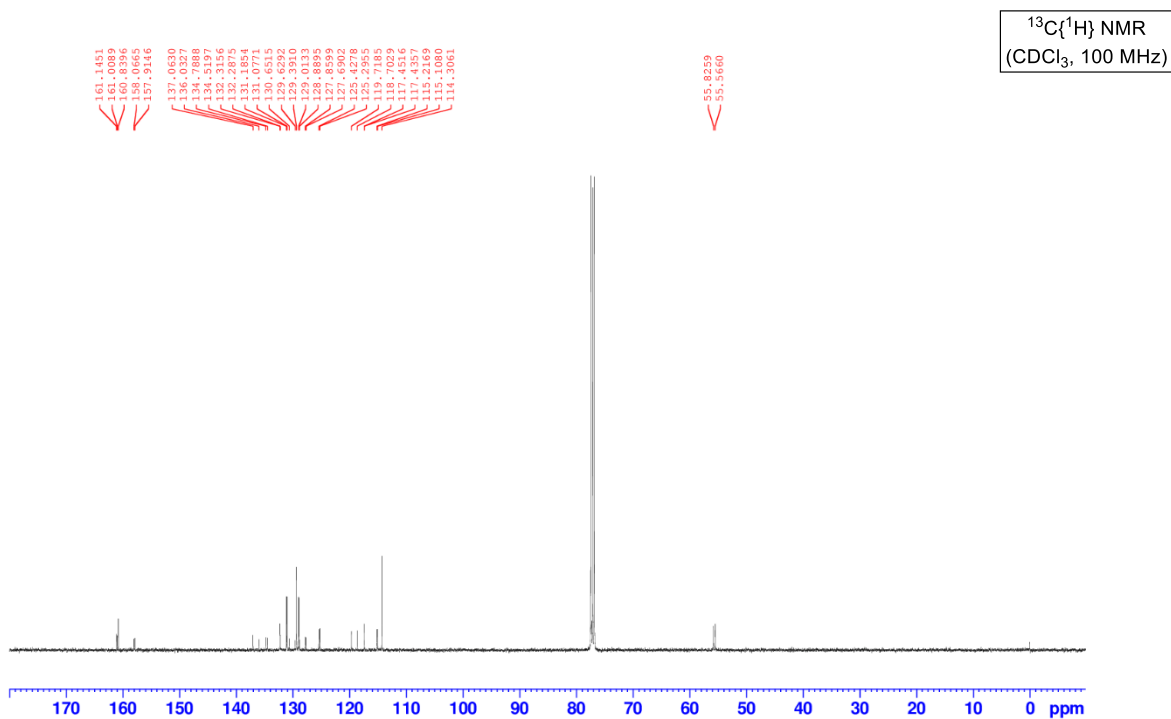

$^{31}\text{P}\{^1\text{H}\}$  NMR  
( $\text{CDCl}_3$ , 162 MHz)

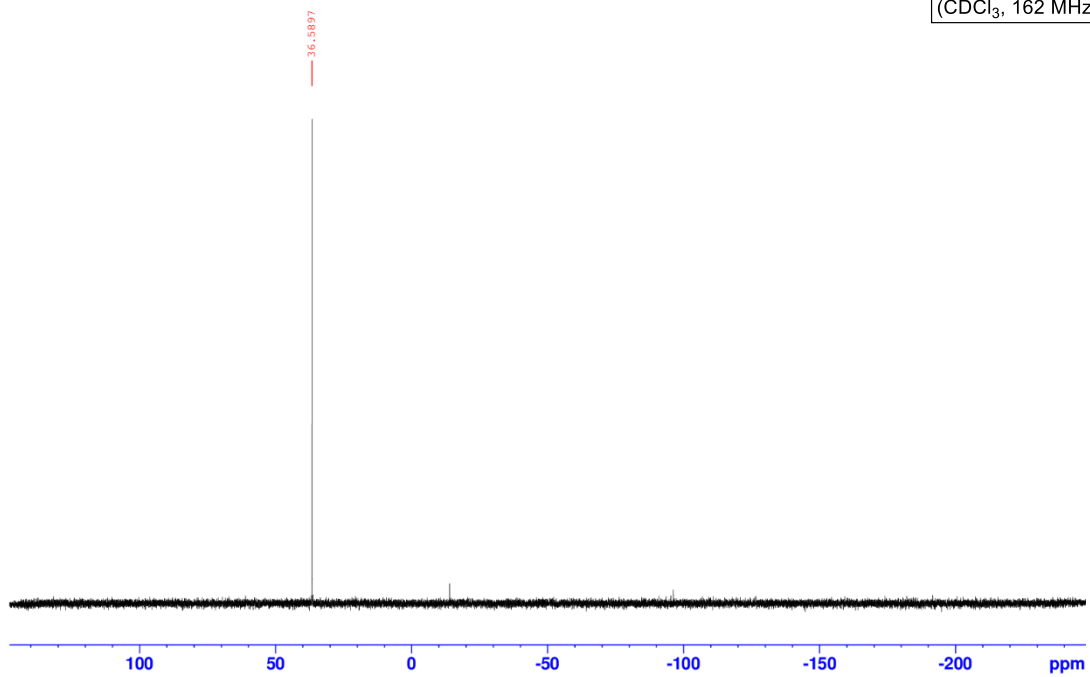

[ $^1\text{H}$ ,  $^{13}\text{C}\{^1\text{H}\}$ ,  $^{19}\text{F}\{^1\text{H}\}$ , and  $^{31}\text{P}\{^1\text{H}\}$ ] NMR Spectra of **2e**

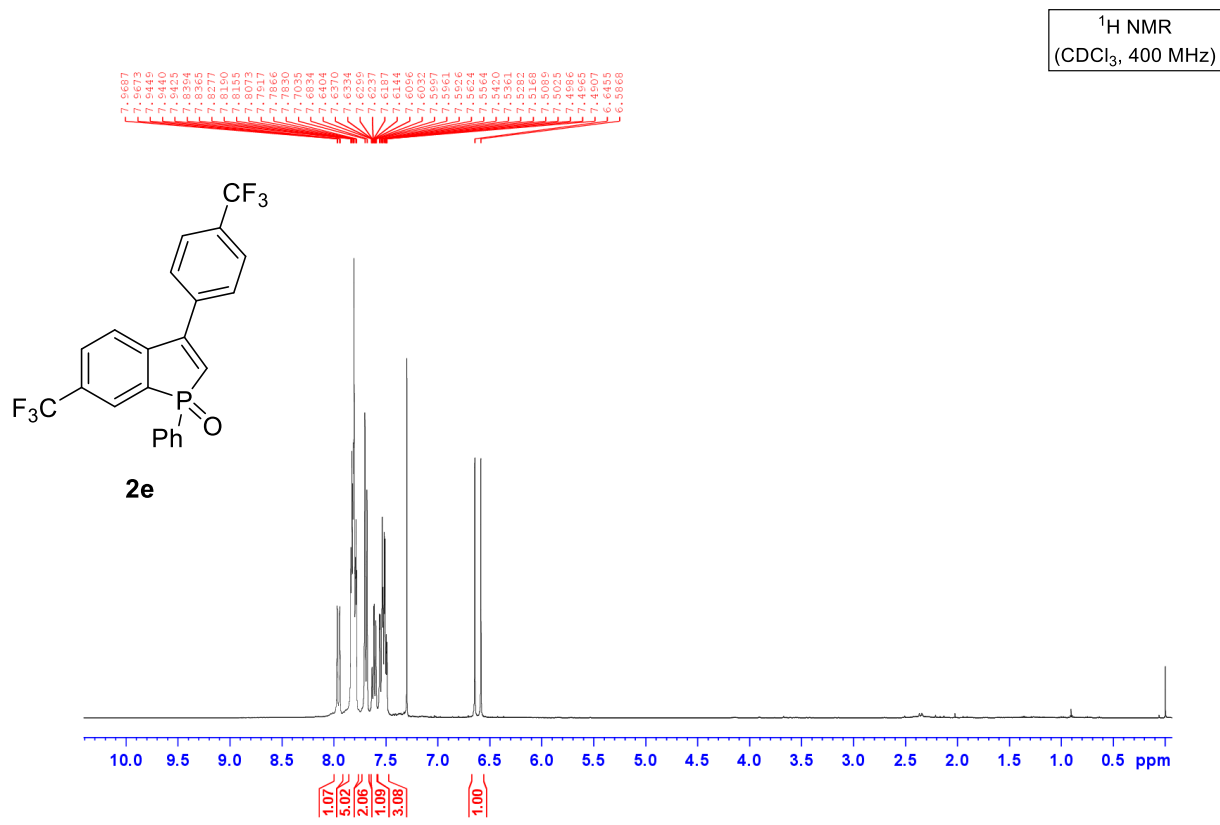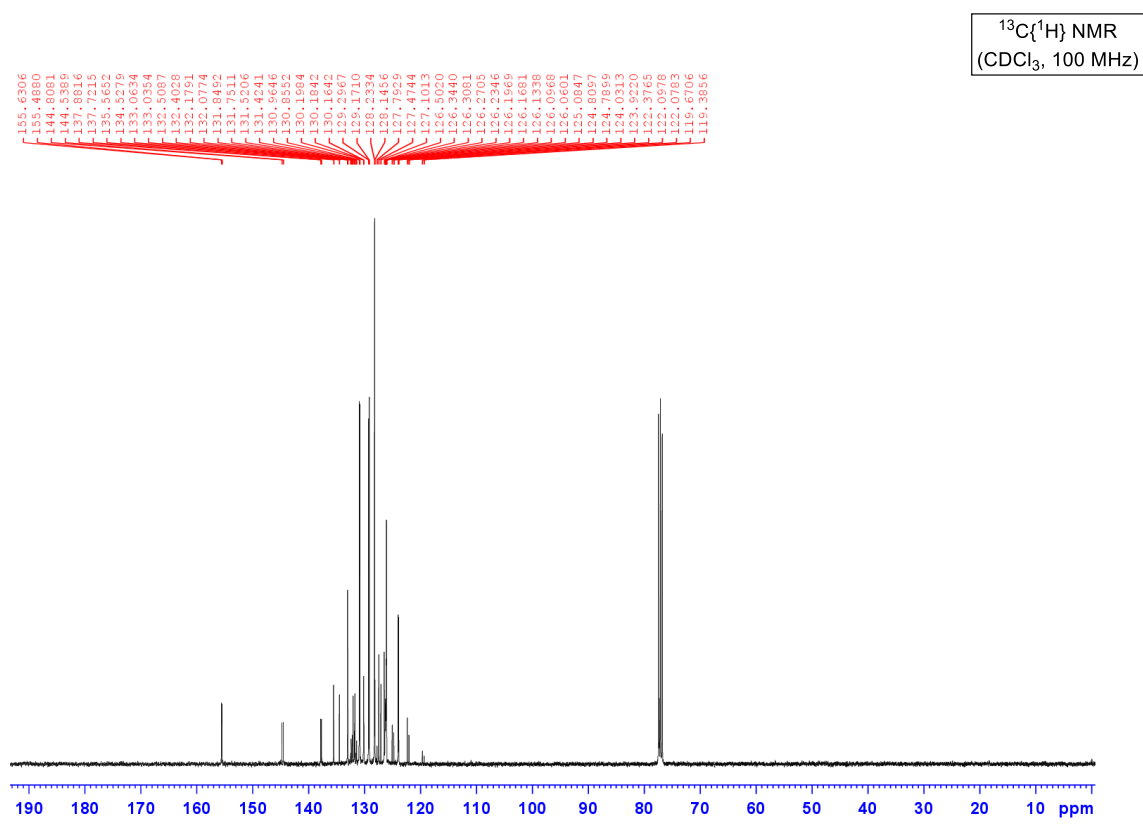

$^{19}\text{F}\{^1\text{H}\}$  NMR  
( $\text{CDCl}_3$ , 376 MHz)

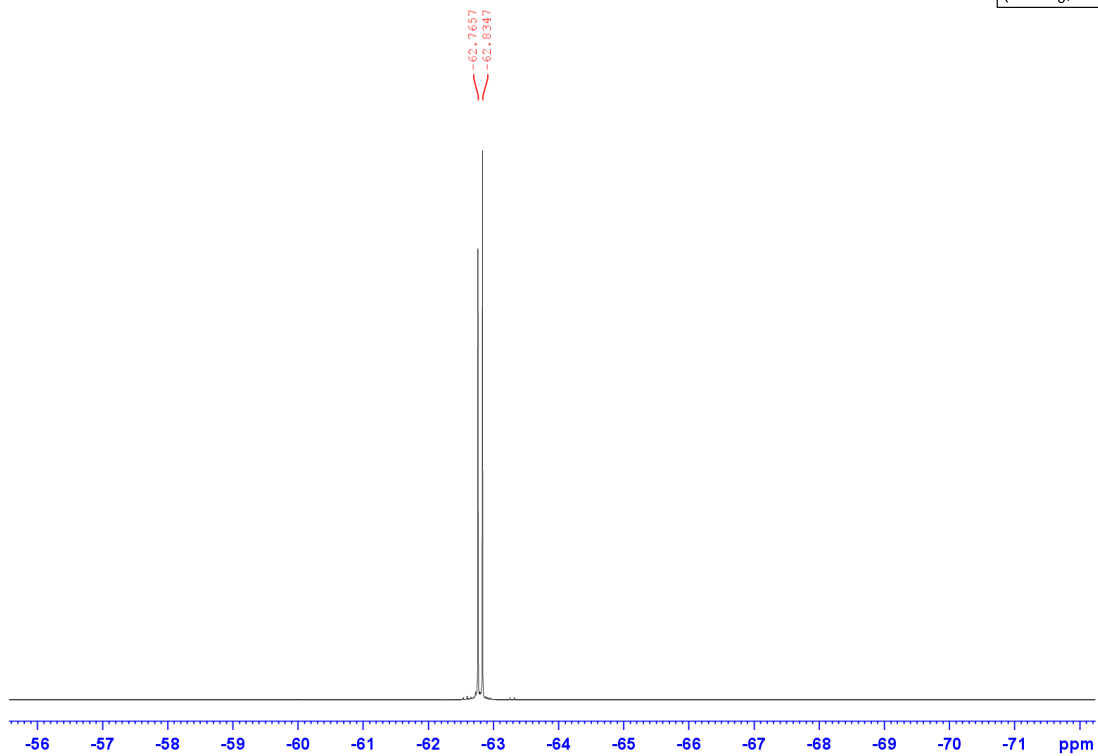

$^{31}\text{P}\{^1\text{H}\}$  NMR  
( $\text{CDCl}_3$ , 162 MHz)

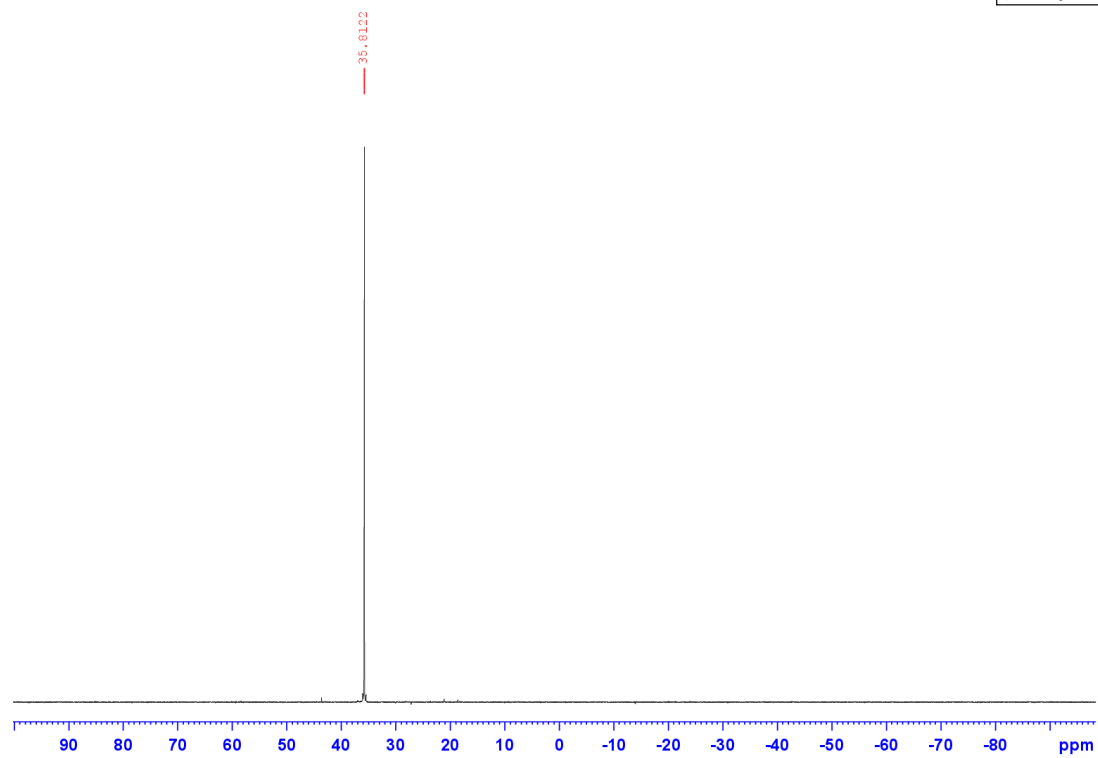



[<sup>1</sup>H, <sup>13</sup>C{<sup>1</sup>H}, <sup>19</sup>F{<sup>1</sup>H}, and <sup>31</sup>P{<sup>1</sup>H} NMR Spectra of **2f**]

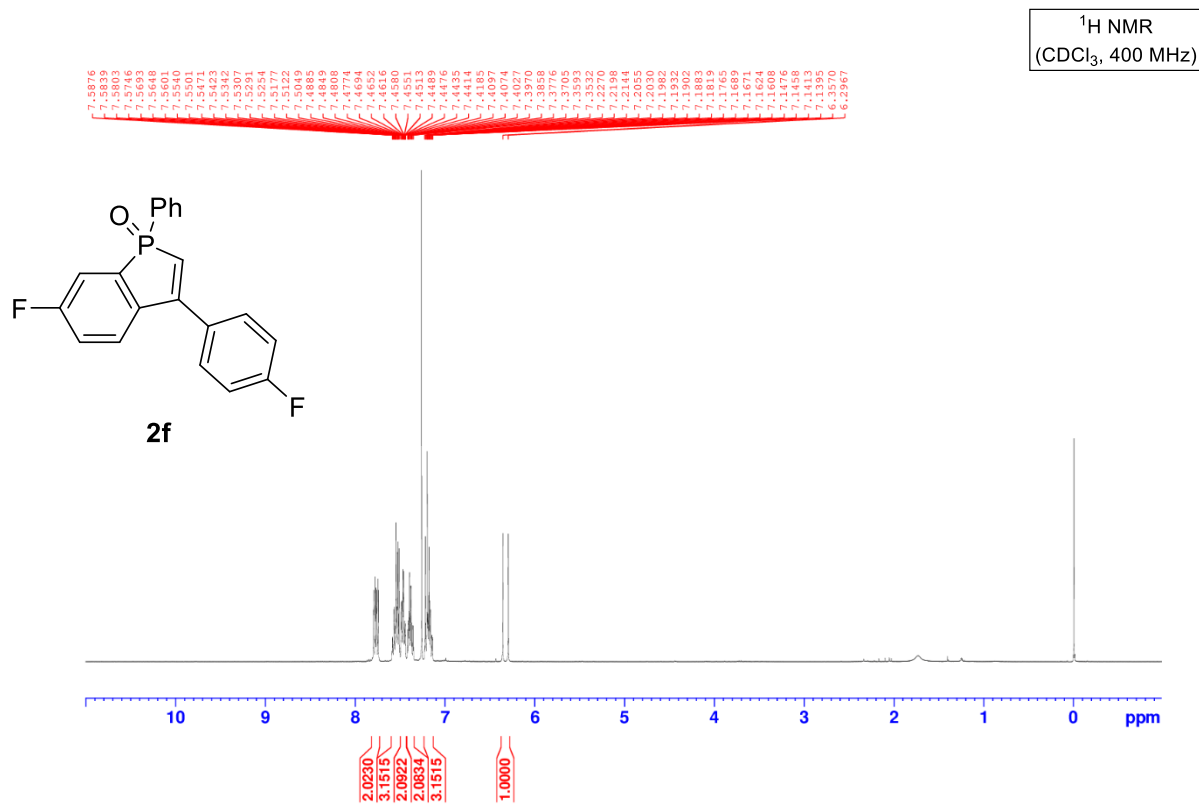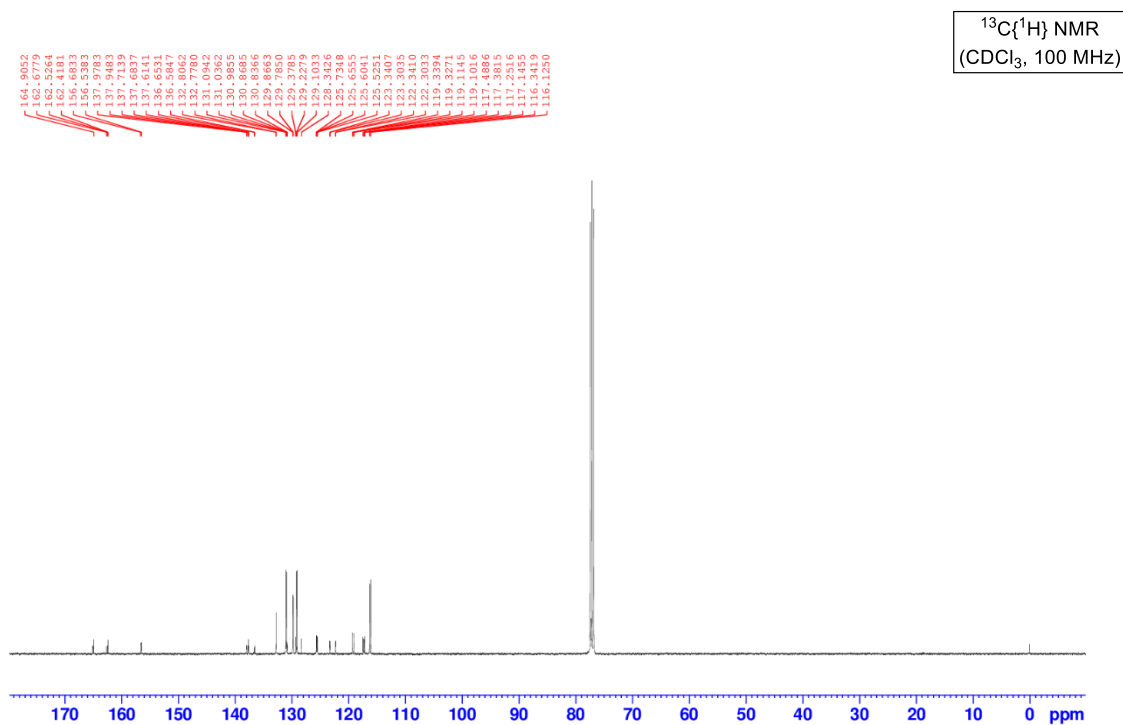

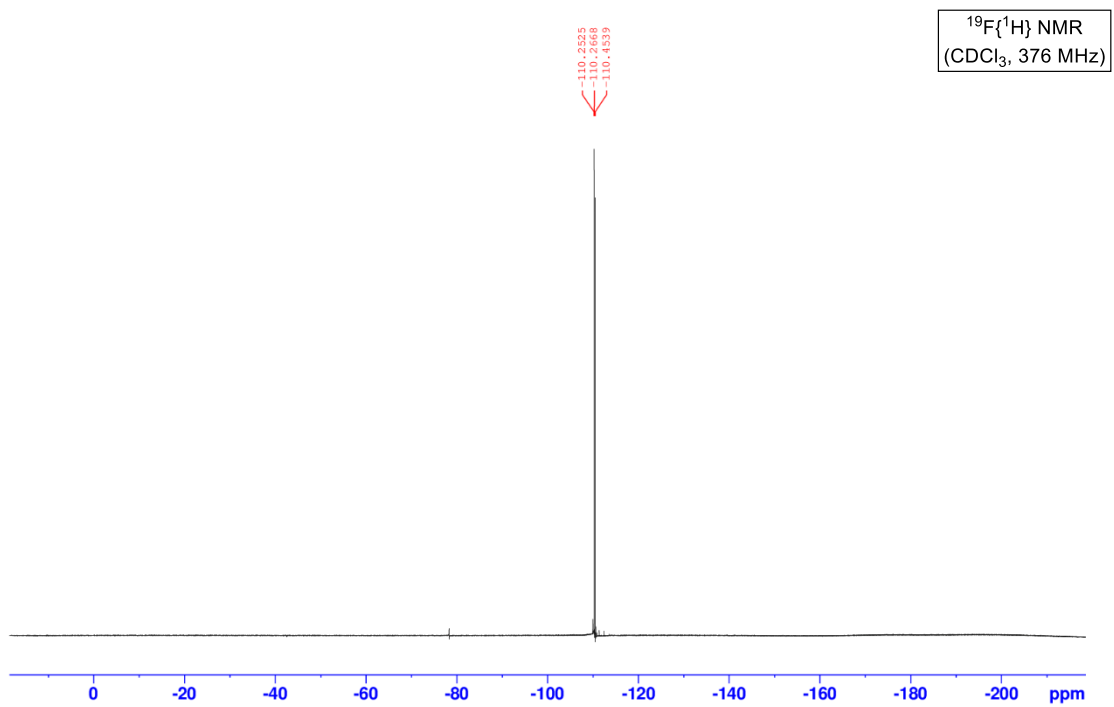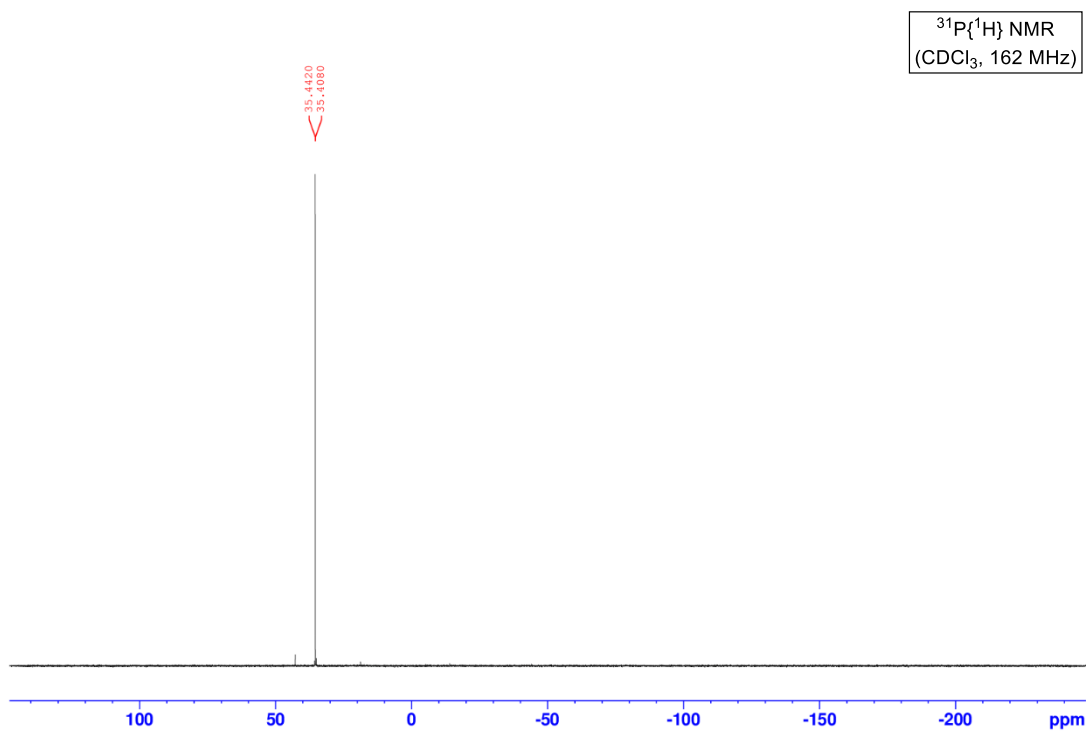

[<sup>1</sup>H, <sup>13</sup>C{<sup>1</sup>H}, and <sup>31</sup>P{<sup>1</sup>H} NMR Spectra of **2g**]

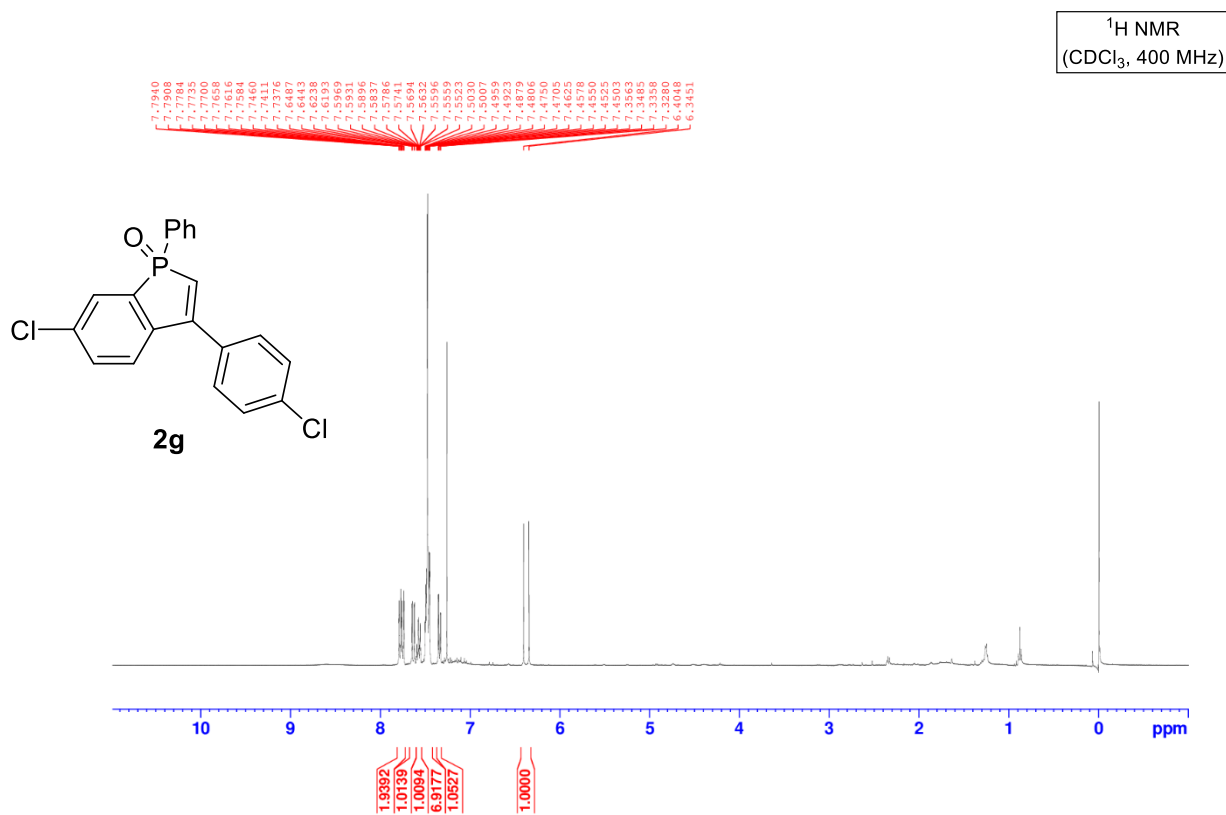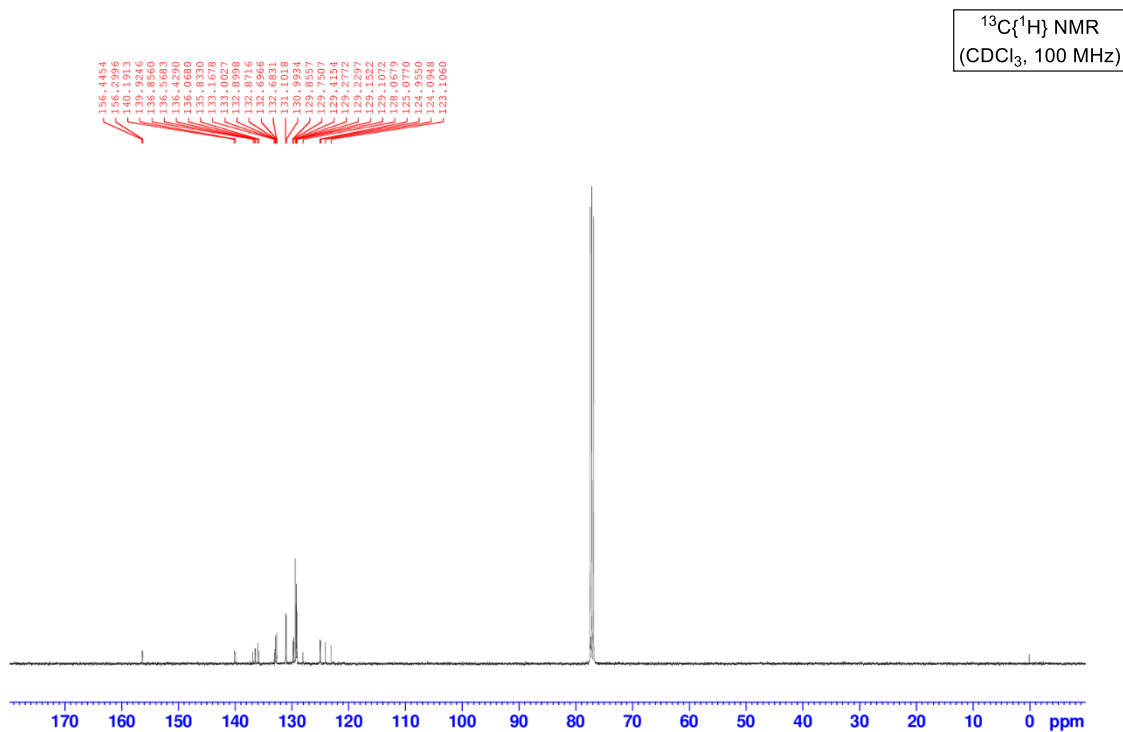

$^{31}\text{P}\{^1\text{H}\}$  NMR  
( $\text{CDCl}_3$ , 162 MHz)

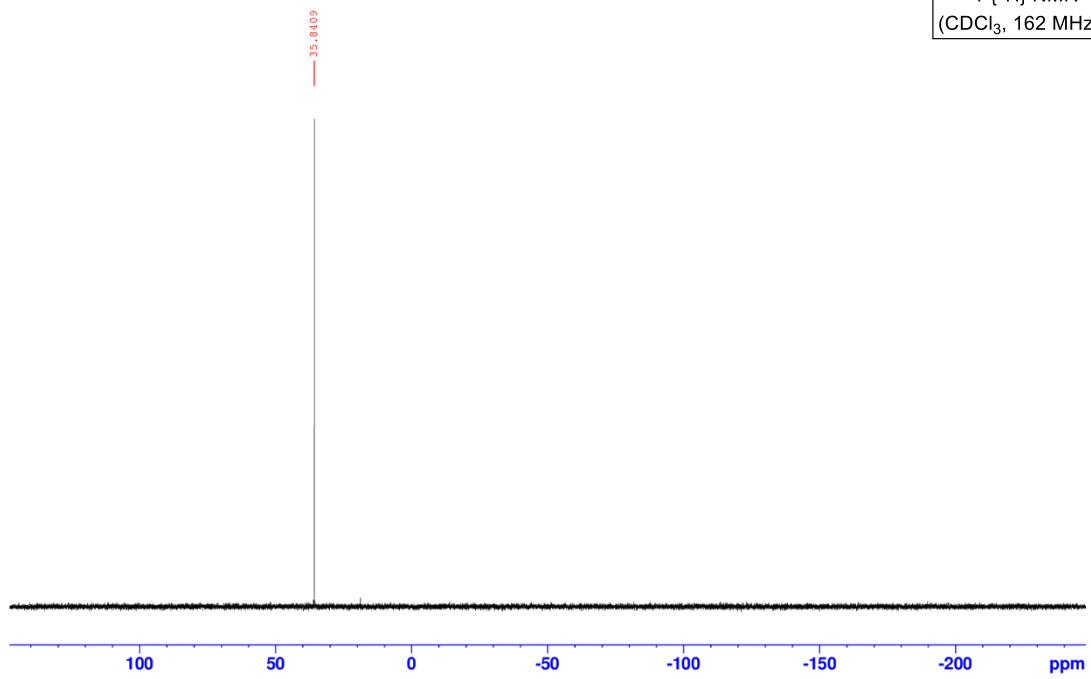

[<sup>1</sup>H, <sup>13</sup>C{<sup>1</sup>H}, and <sup>31</sup>P{<sup>1</sup>H} NMR Spectra of **2h**]

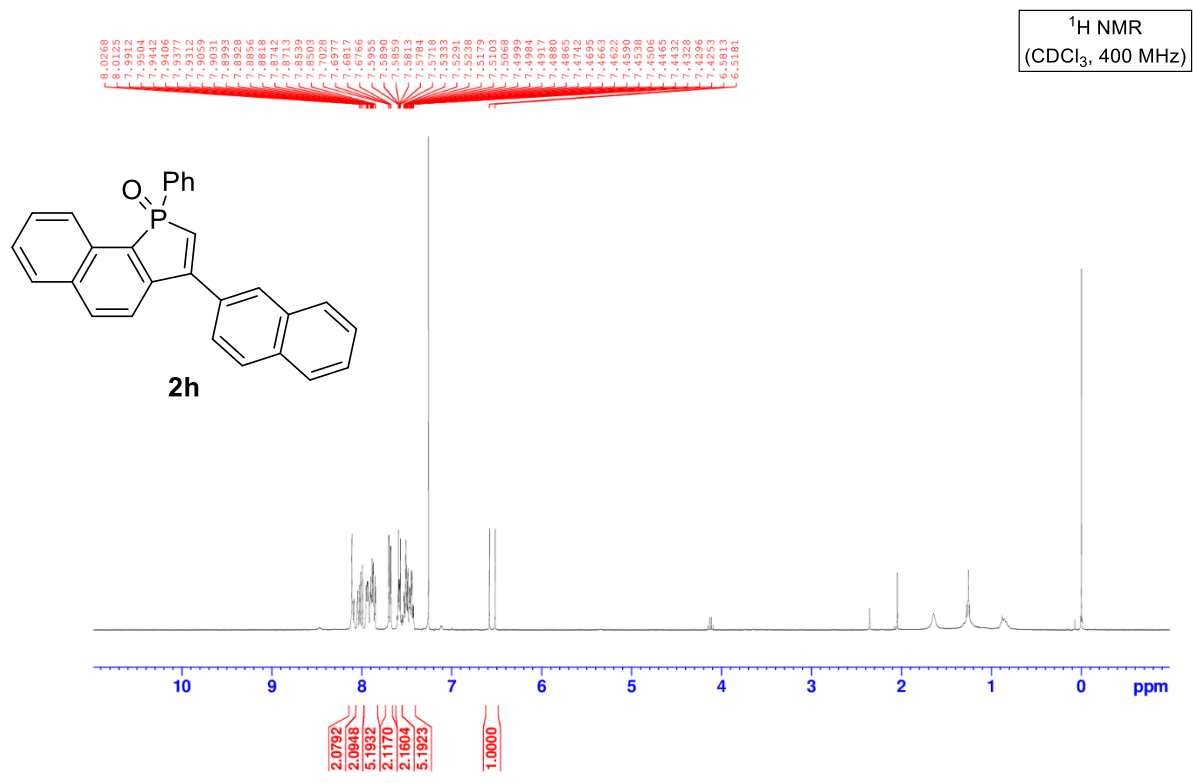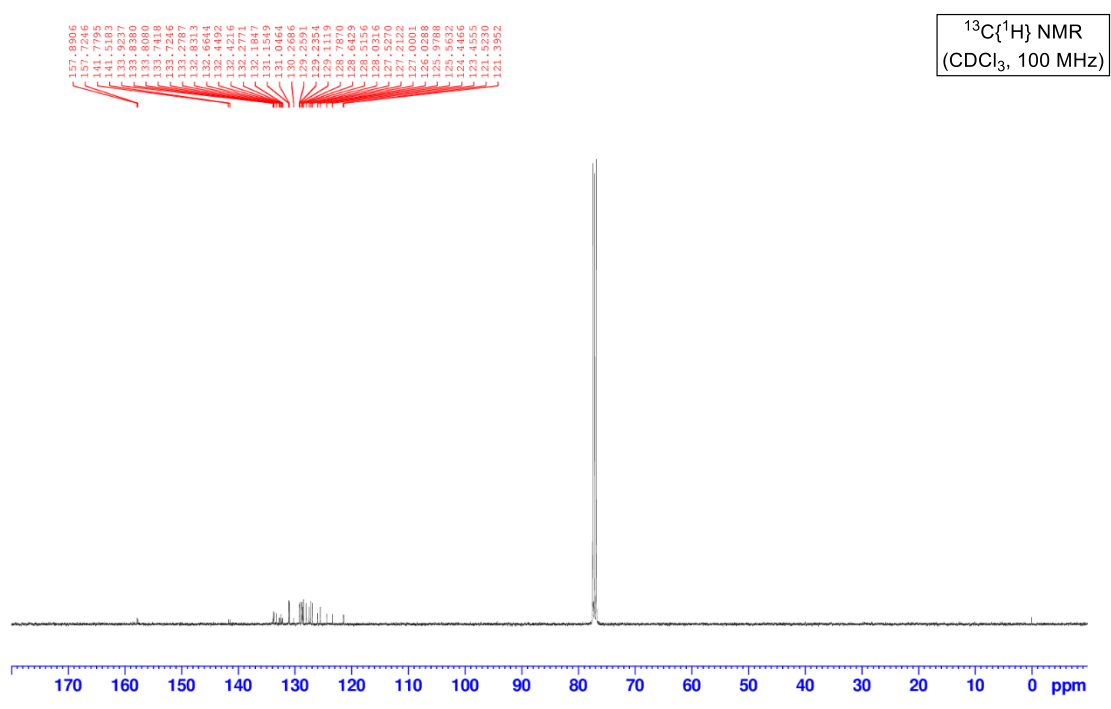

$^{31}\text{P}\{^1\text{H}\}$  NMR  
( $\text{CDCl}_3$ , 162 MHz)

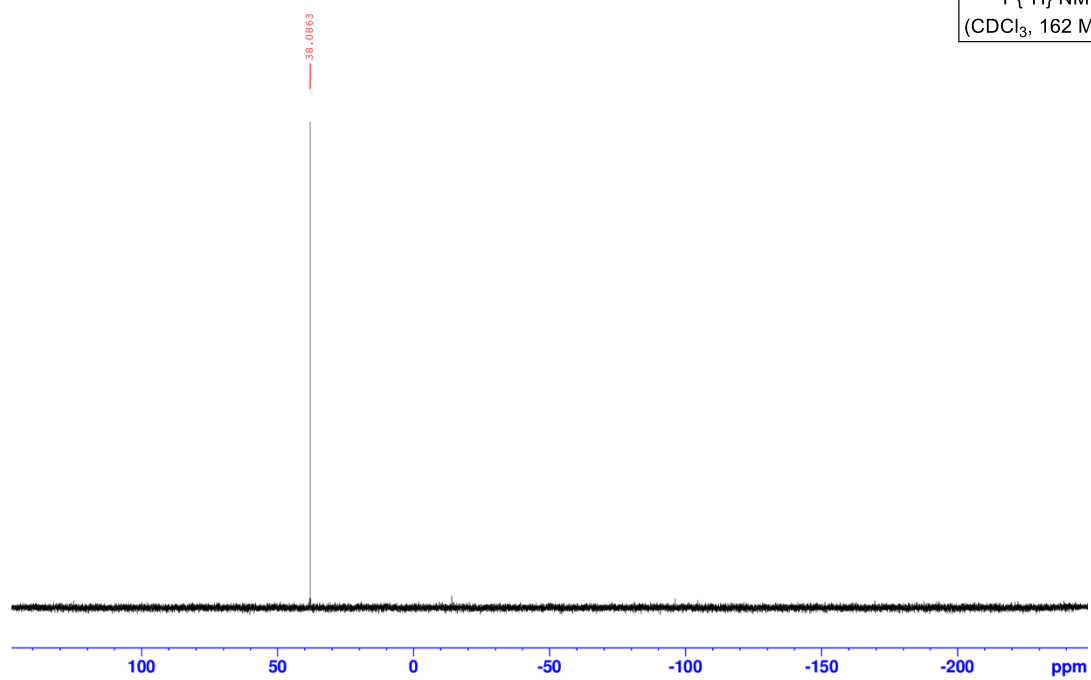

$^1\text{H}$ ,  $^{13}\text{C}\{^1\text{H}\}$ , and  $^{31}\text{P}\{^1\text{H}\}$  NMR Spectra of **2i**

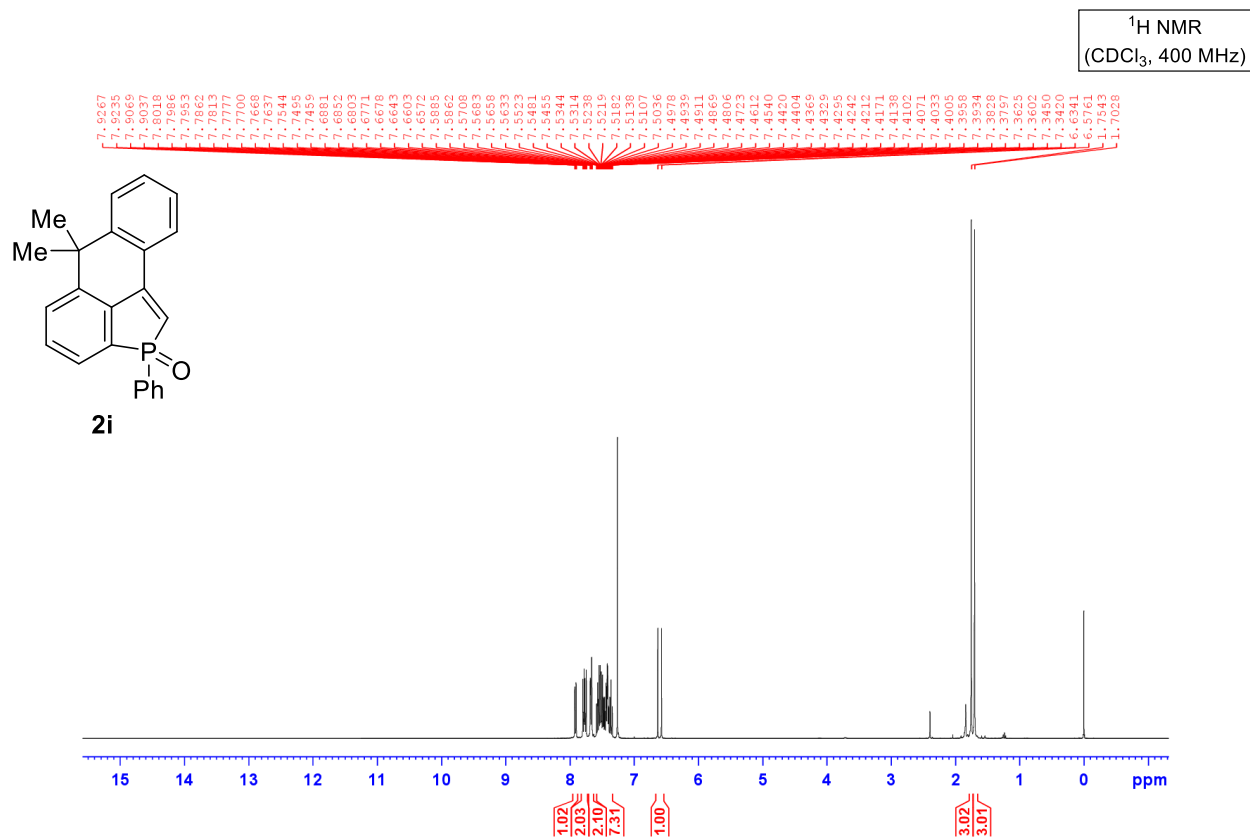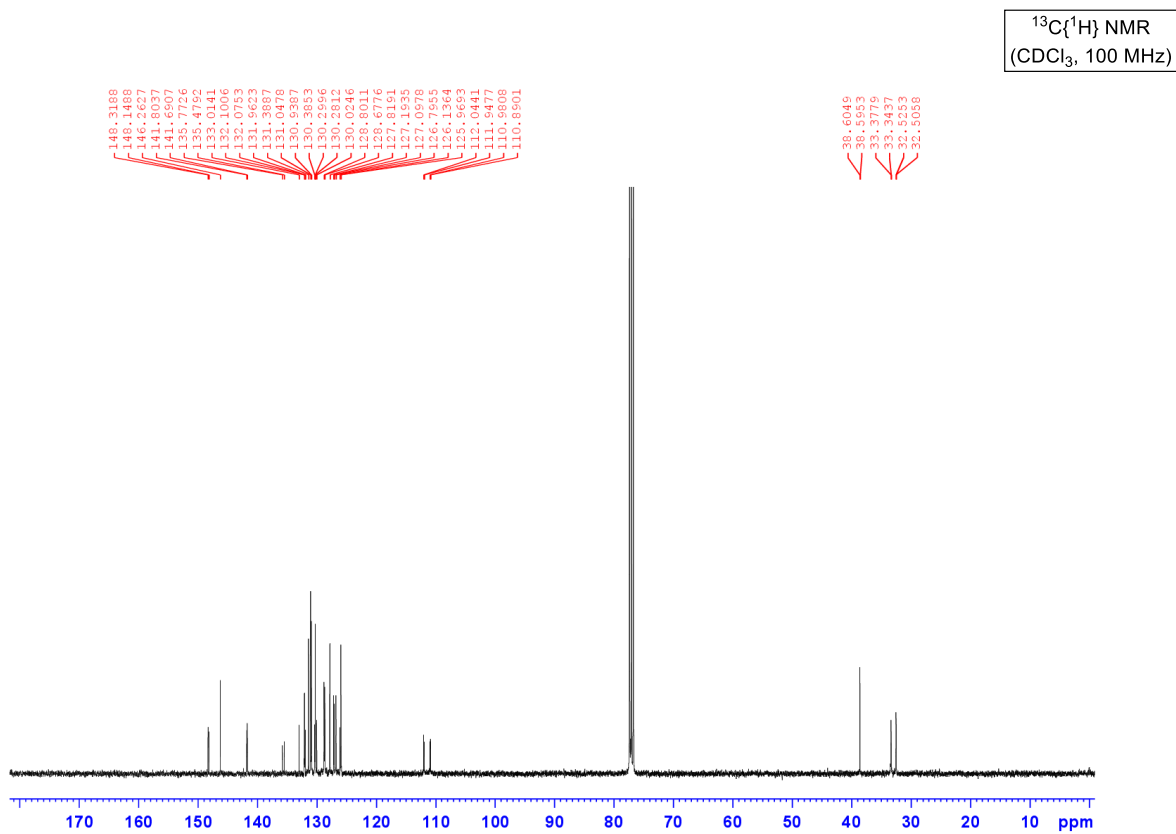

$^{31}\text{P}\{^1\text{H}\}$  NMR  
( $\text{CDCl}_3$ , 162 MHz)

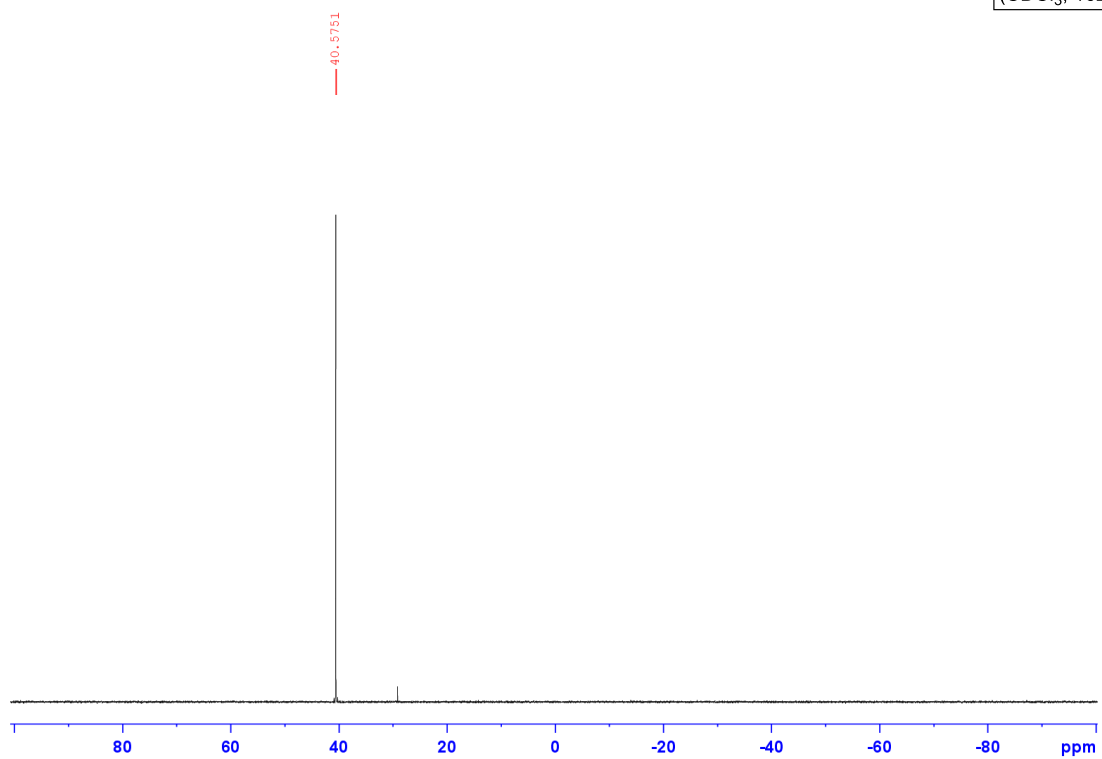



[<sup>1</sup>H, <sup>13</sup>C{<sup>1</sup>H}, and <sup>31</sup>P{<sup>1</sup>H} NMR Spectra of **2j**]

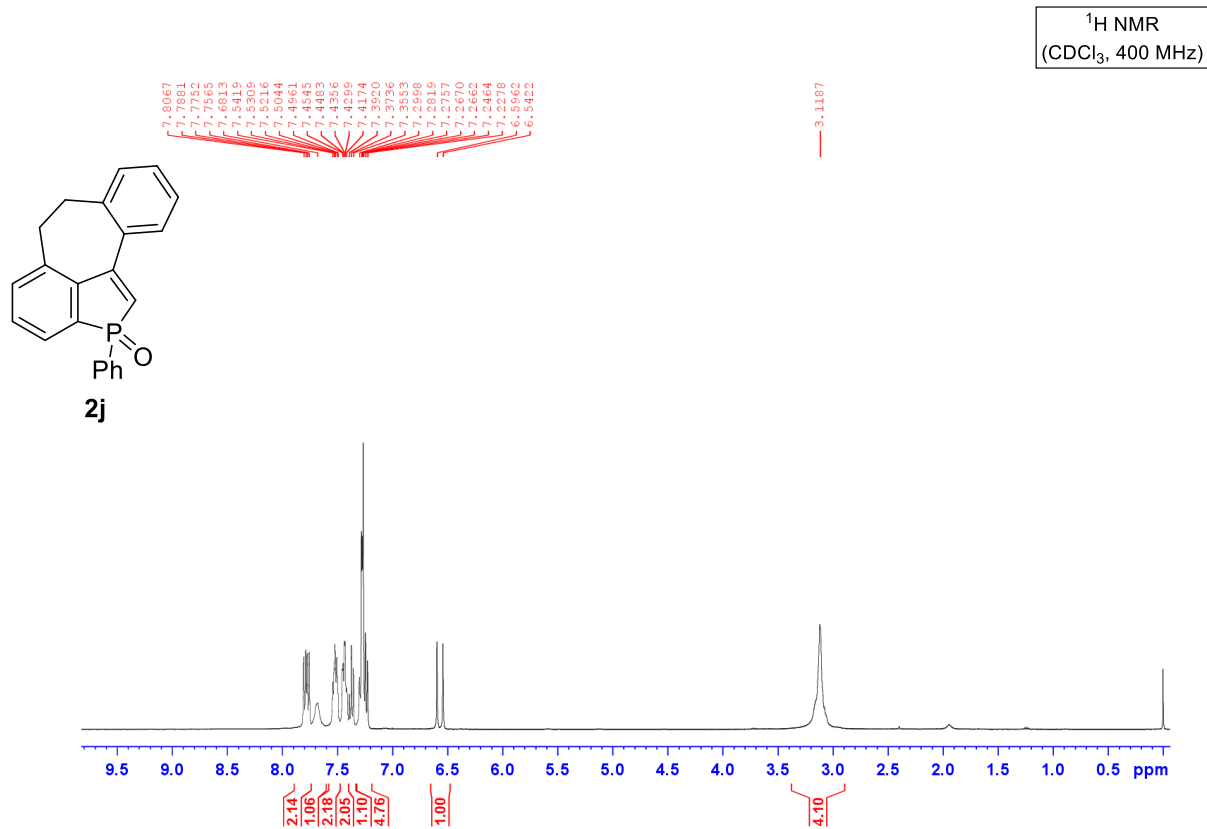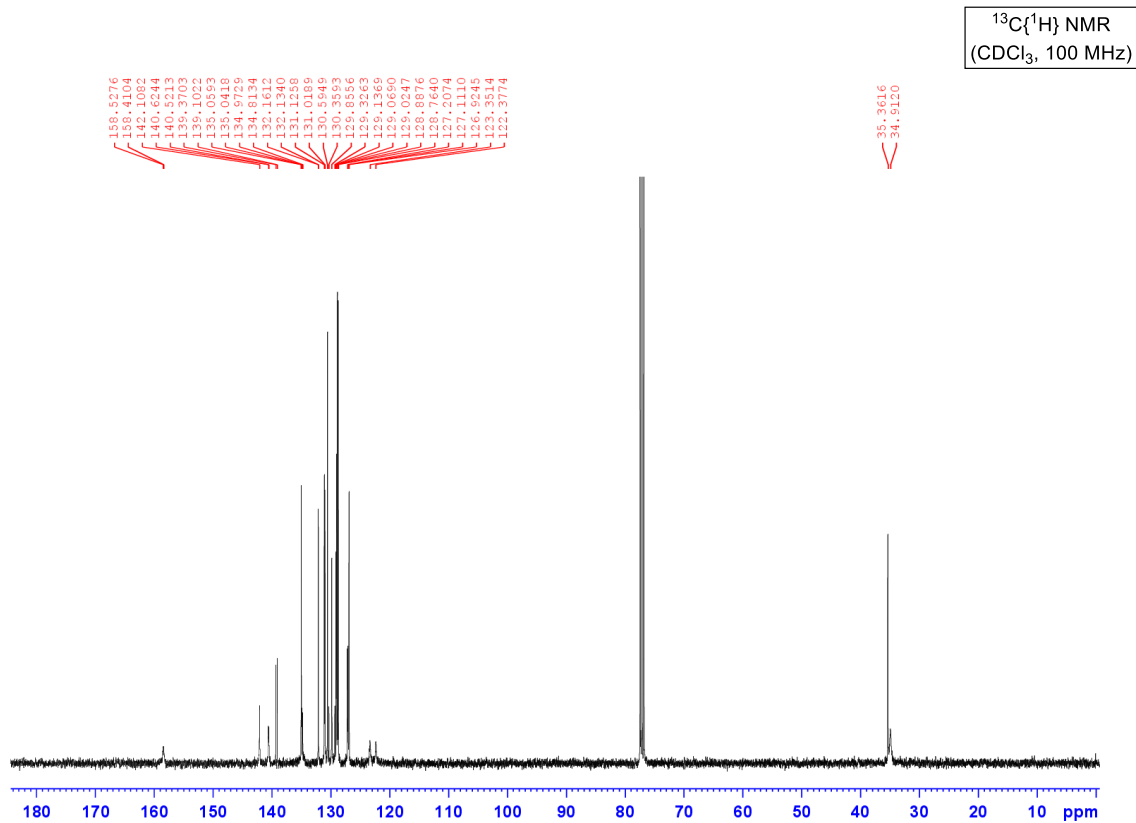

$^{31}\text{P}\{^1\text{H}\}$  NMR  
( $\text{CDCl}_3$ , 162 MHz)

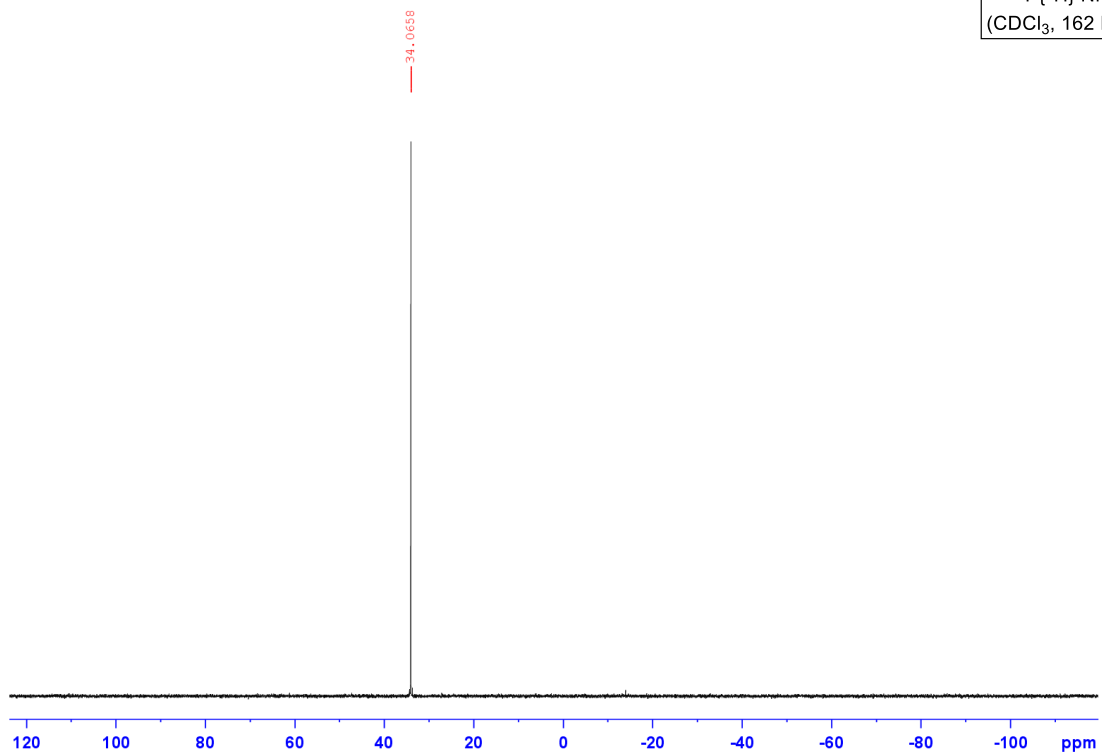

[<sup>1</sup>H, <sup>13</sup>C{<sup>1</sup>H}, <sup>19</sup>F{<sup>1</sup>H}, and <sup>31</sup>P{<sup>1</sup>H} NMR Spectra of **2k**]

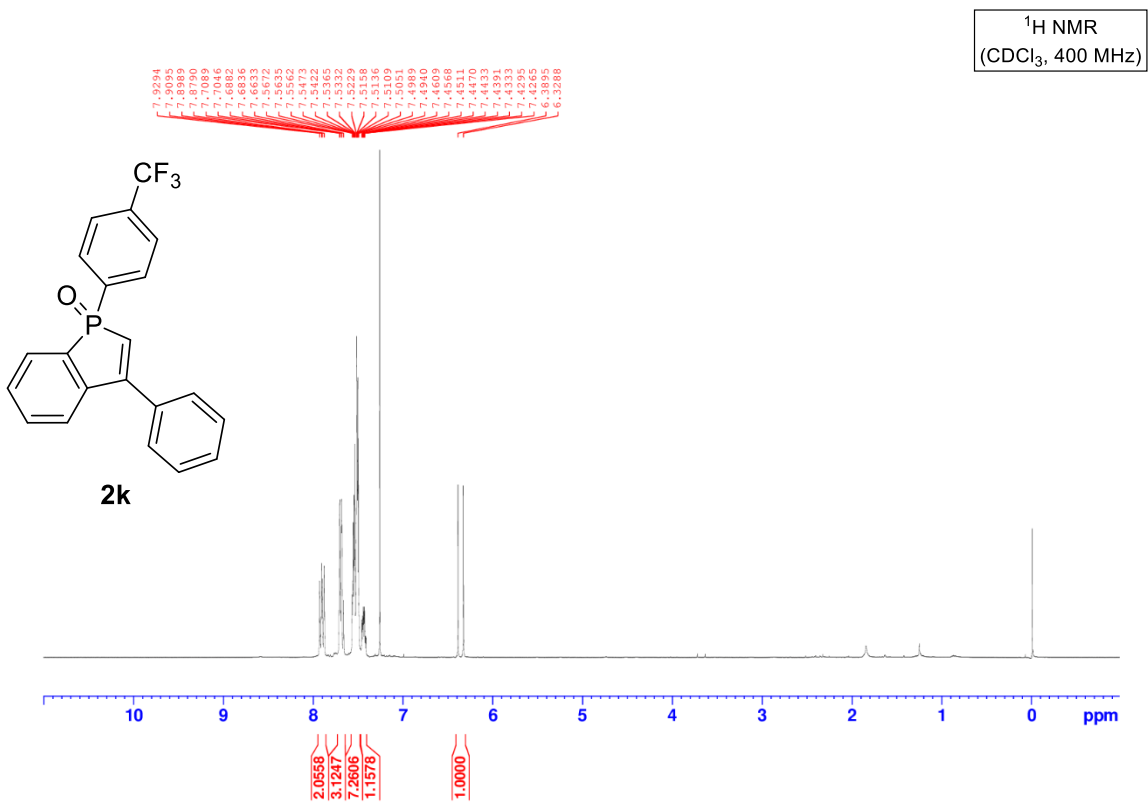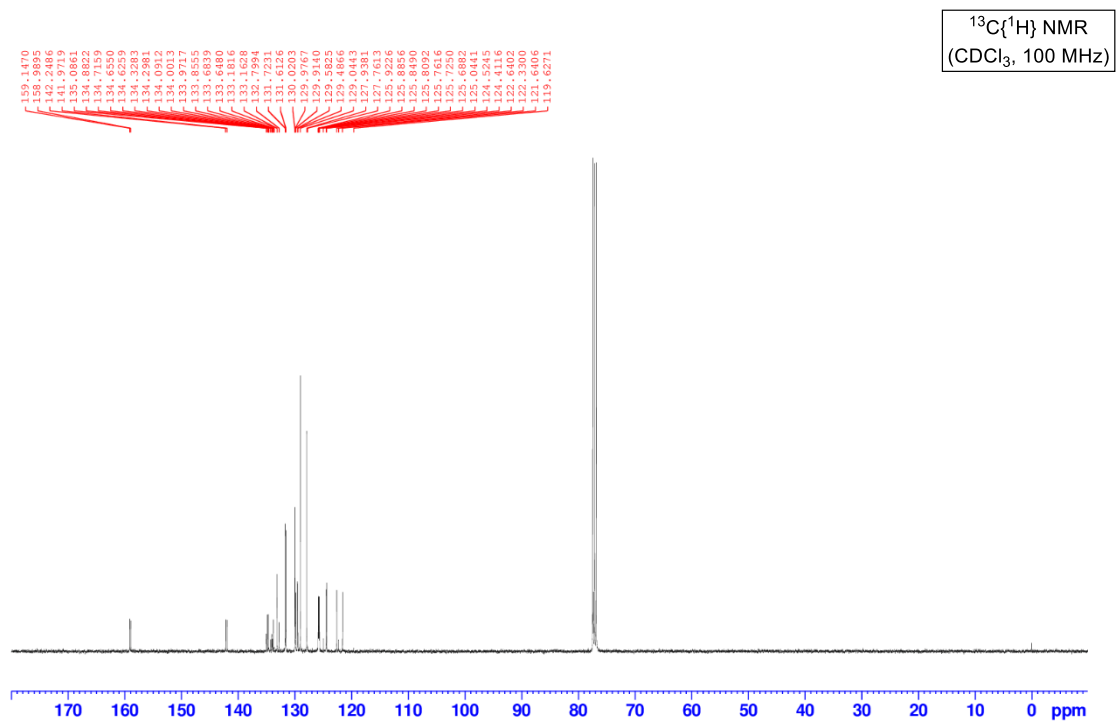

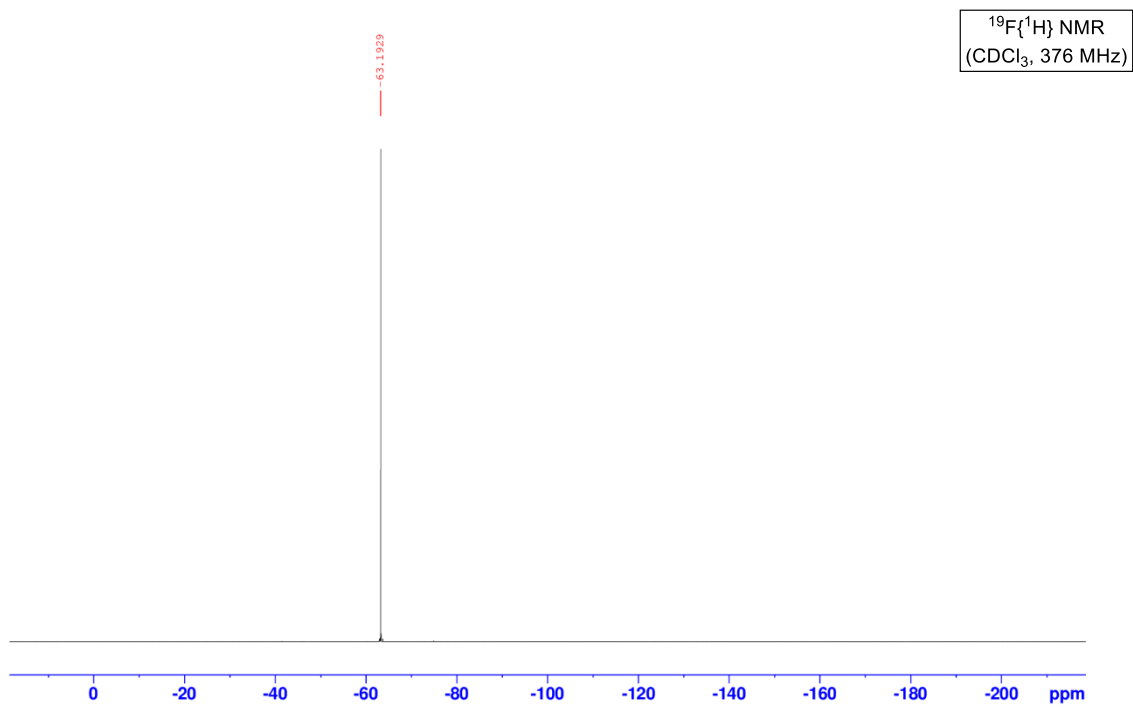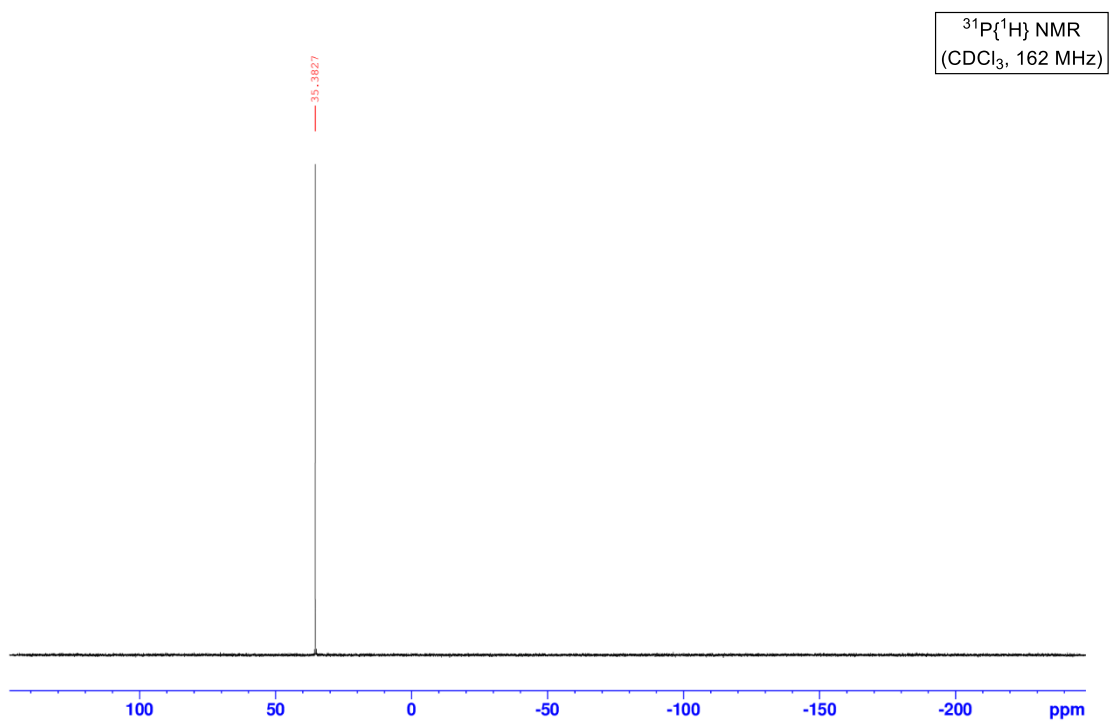

[<sup>1</sup>H, <sup>13</sup>C{<sup>1</sup>H}, and <sup>31</sup>P{<sup>1</sup>H}] NMR Spectra of **2I**

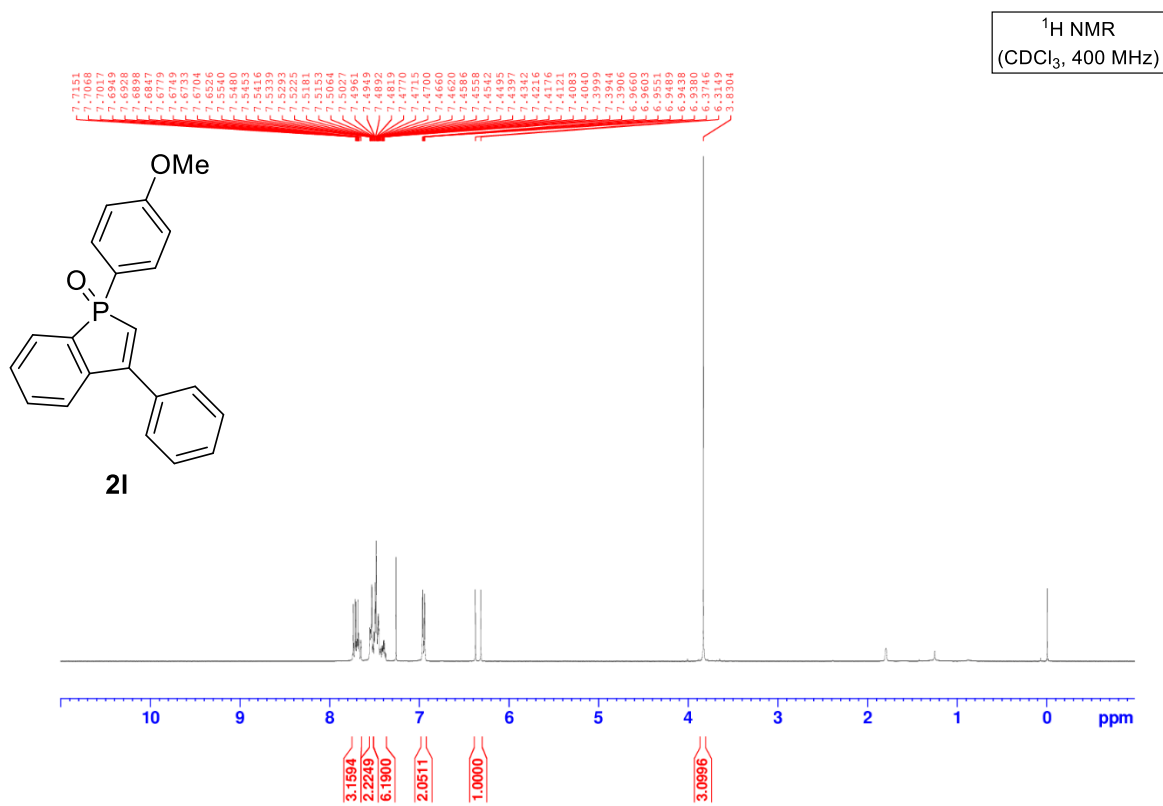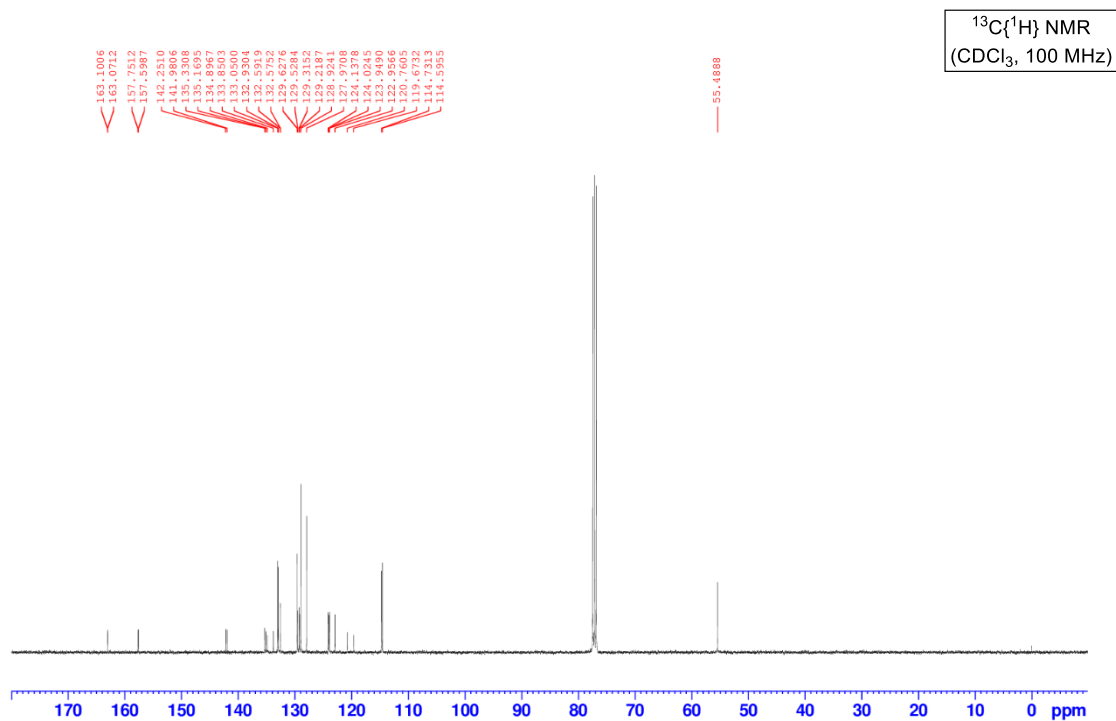

$^{31}\text{P}\{^1\text{H}\}$  NMR  
( $\text{CDCl}_3$ , 162 MHz)

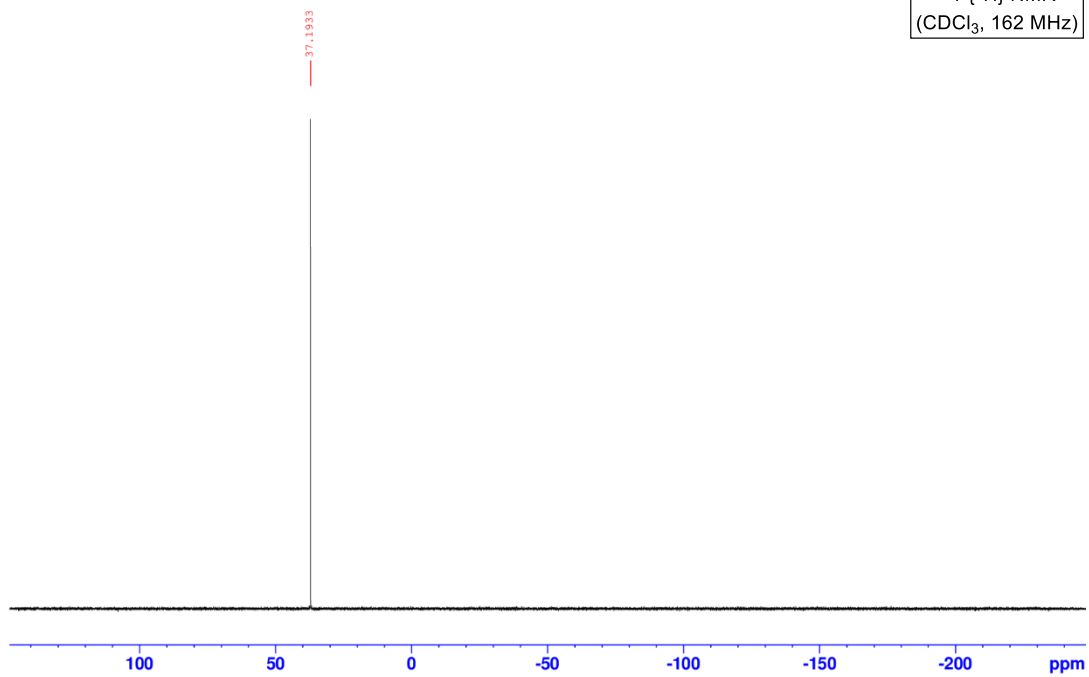

[ $^1\text{H}$ ,  $^{13}\text{C}\{^1\text{H}\}$ , and  $^{31}\text{P}\{^1\text{H}\}$  NMR Spectra of **2m** + **2m'**]

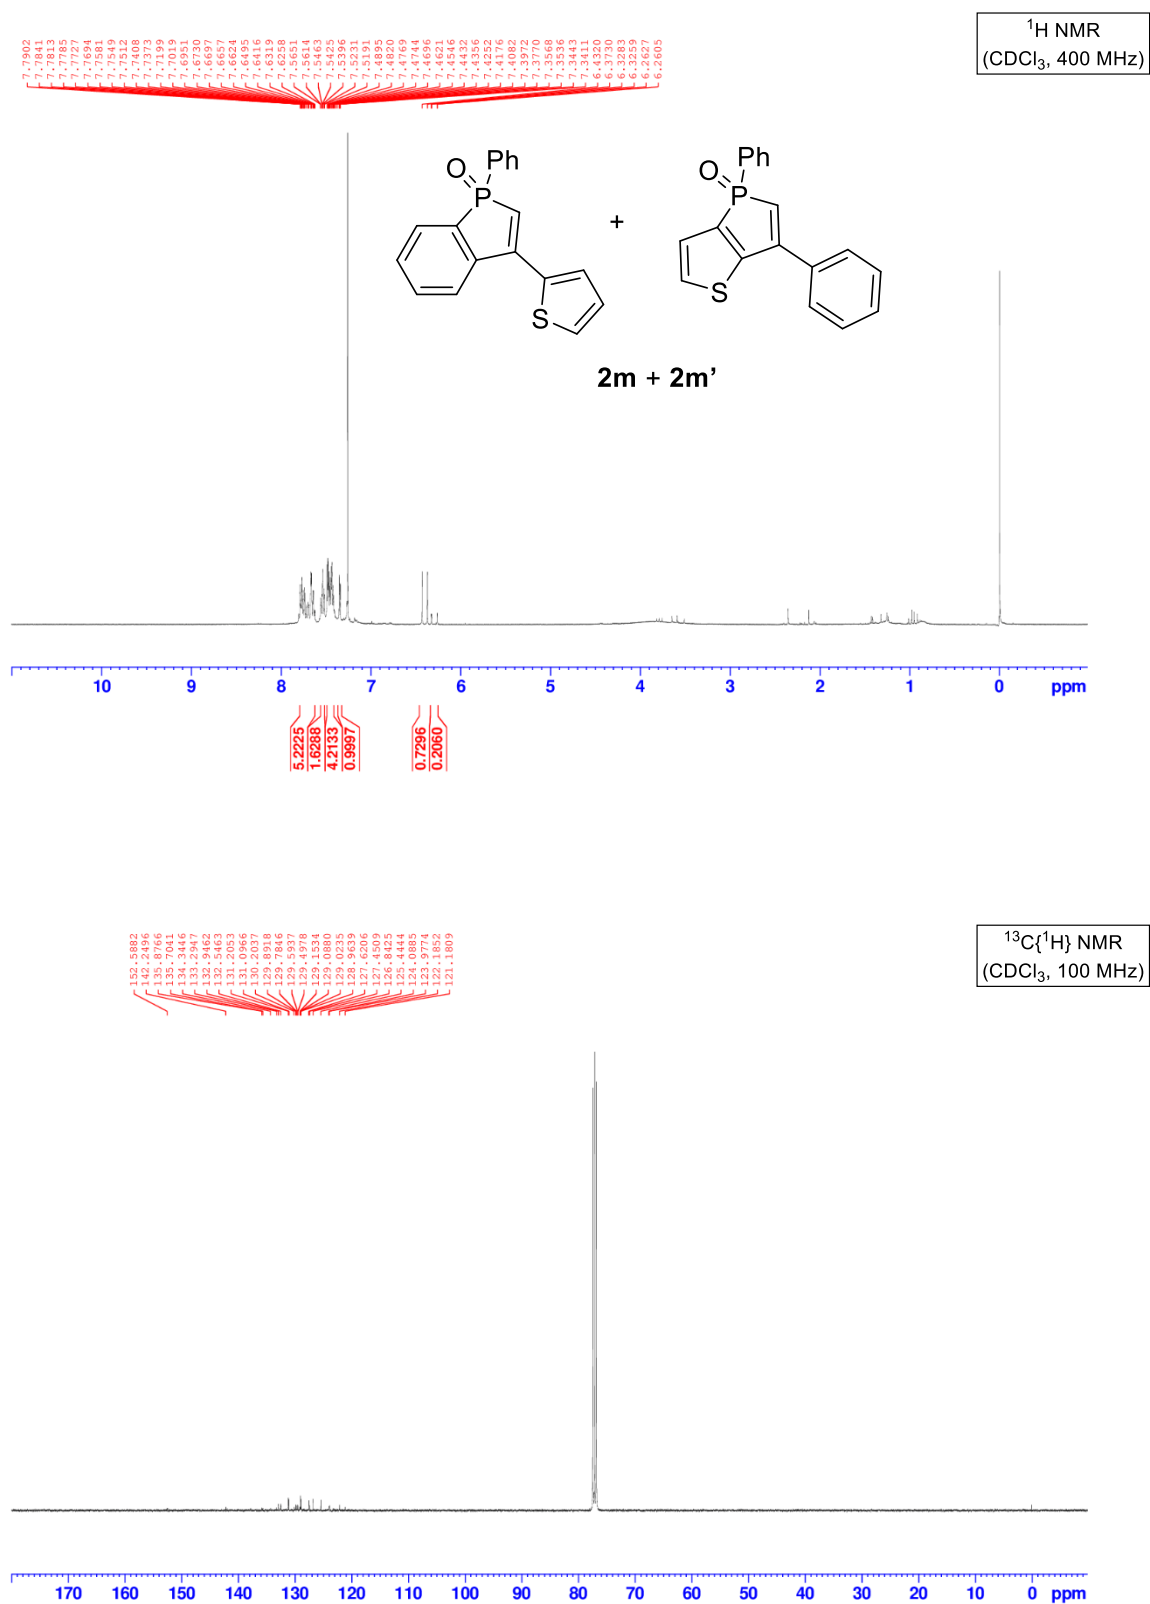

$^{31}\text{P}\{^1\text{H}\}$  NMR  
( $\text{CDCl}_3$ , 162 MHz)

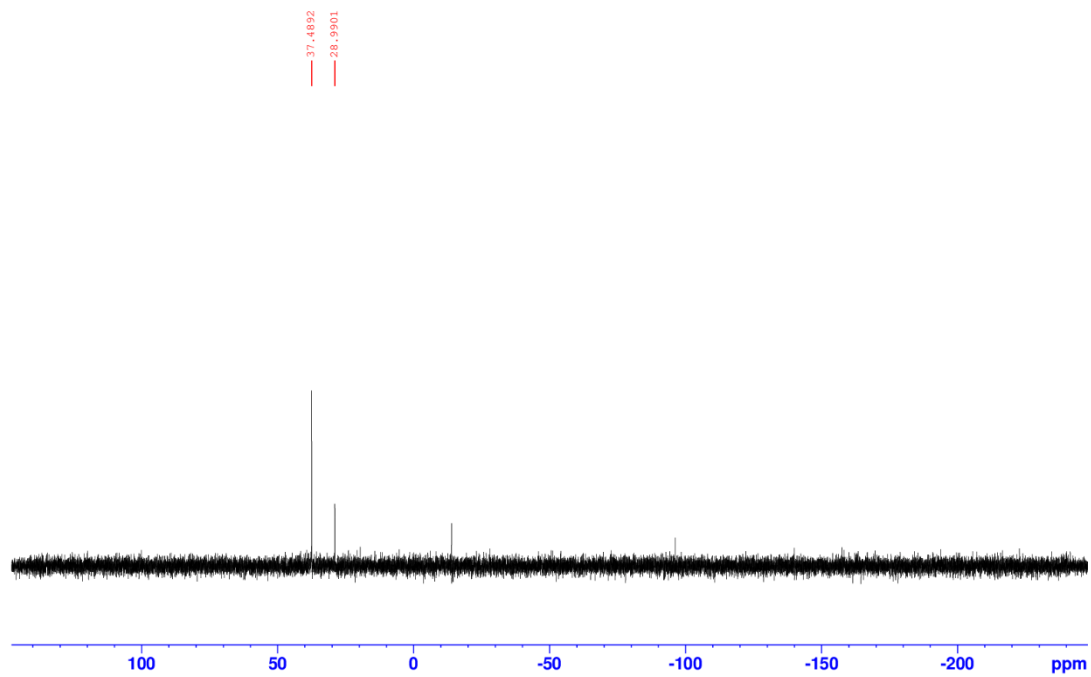



[<sup>1</sup>H, <sup>13</sup>C{<sup>1</sup>H}, and <sup>31</sup>P{<sup>1</sup>H} NMR Spectra of **2n**]

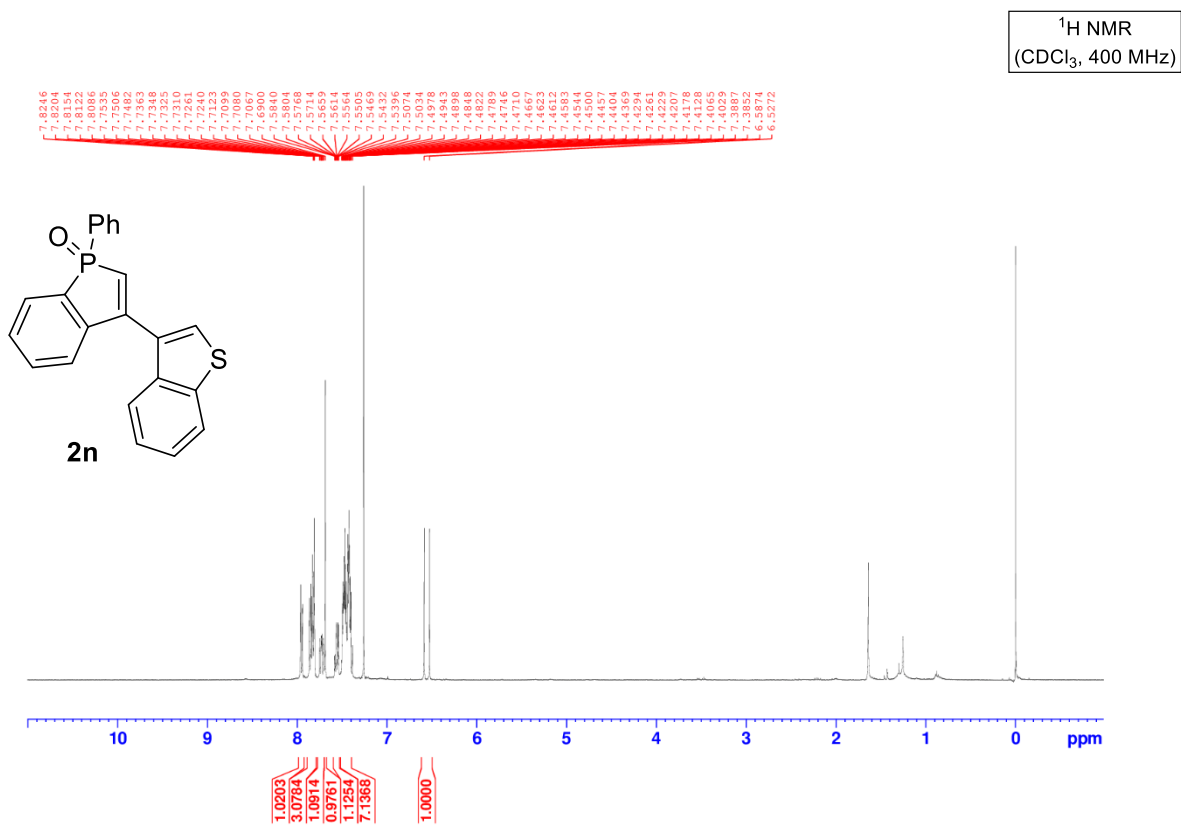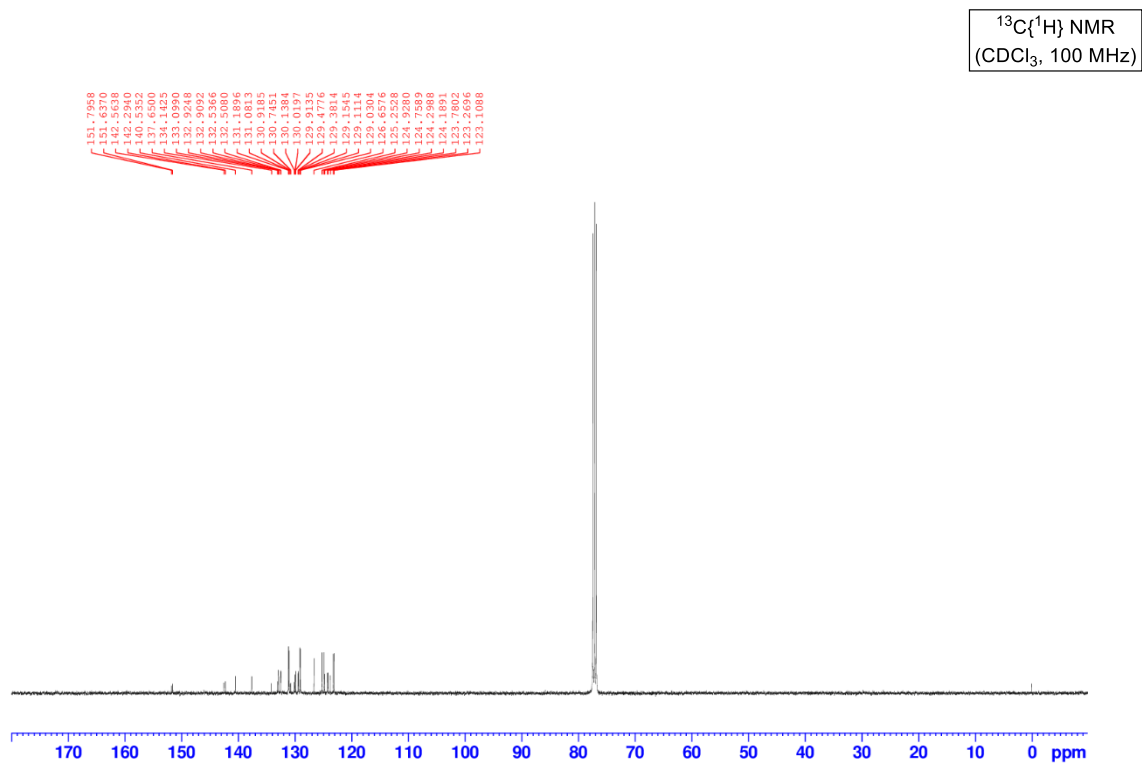

$^{31}\text{P}\{^1\text{H}\}$  NMR  
( $\text{CDCl}_3$ , 162 MHz)

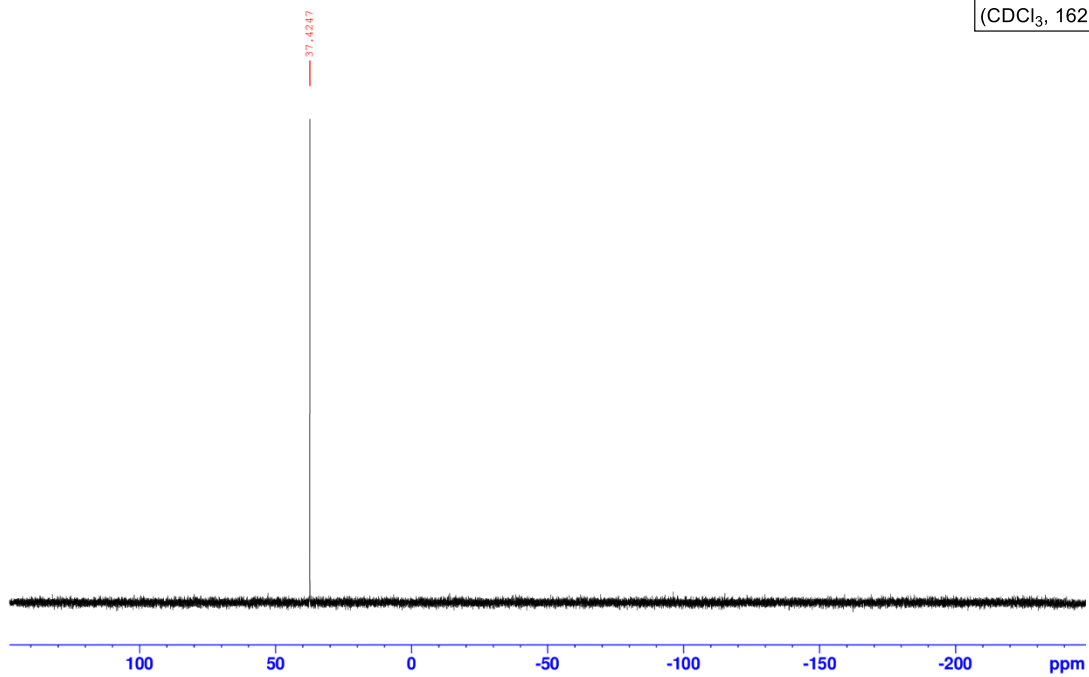

[ $^1\text{H}$  and  $^{31}\text{P}\{^1\text{H}\}$  NMR Spectra of **2n'**]

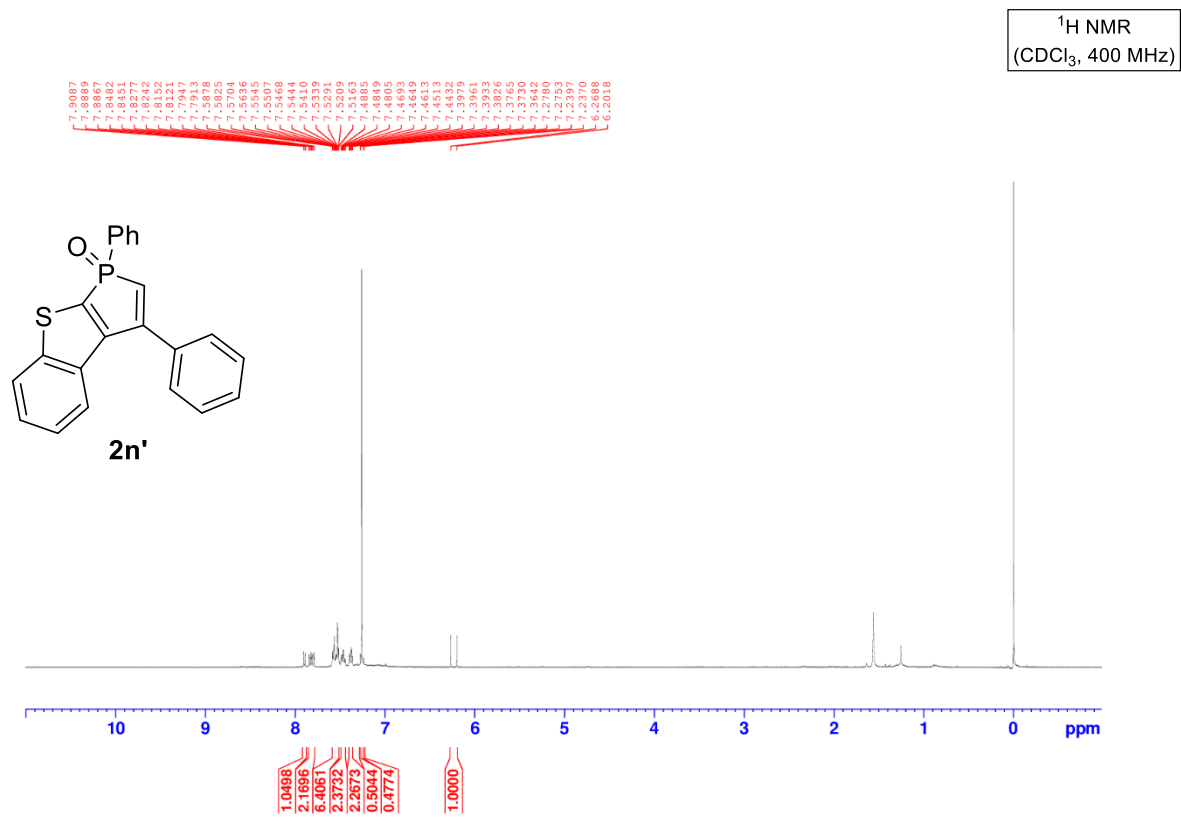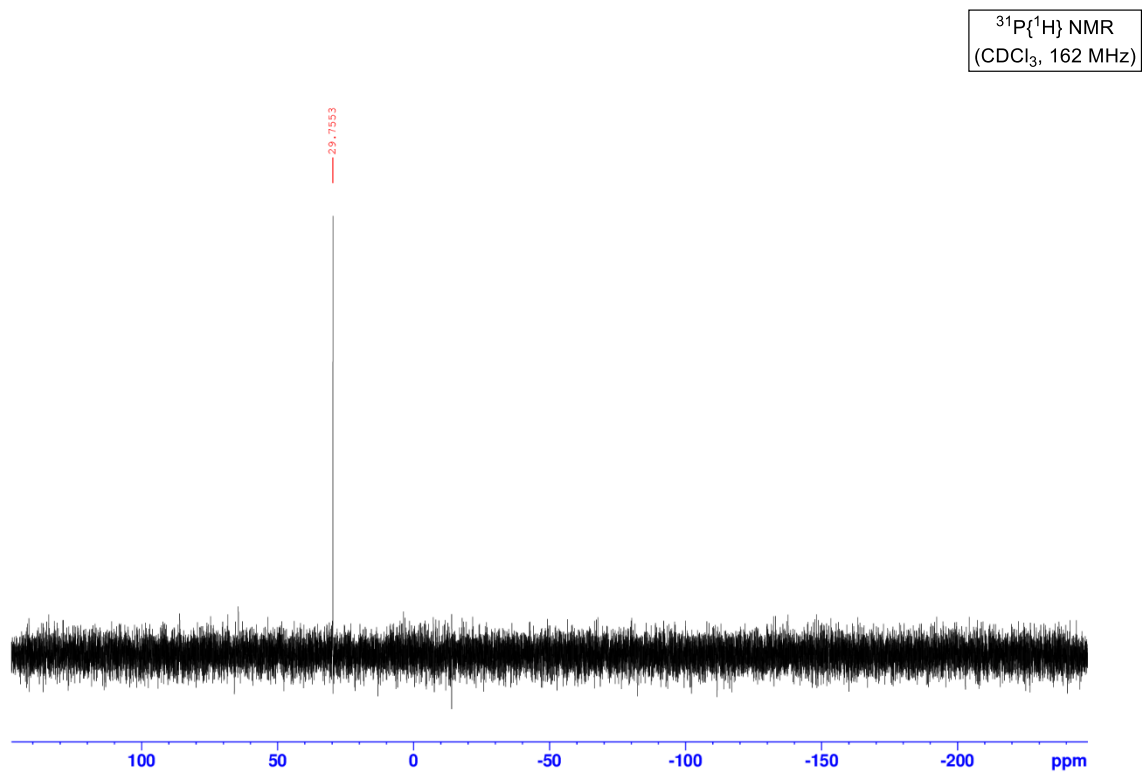

[<sup>1</sup>H, <sup>13</sup>C{<sup>1</sup>H}, and <sup>31</sup>P{<sup>1</sup>H} NMR Spectra of **4aa**]

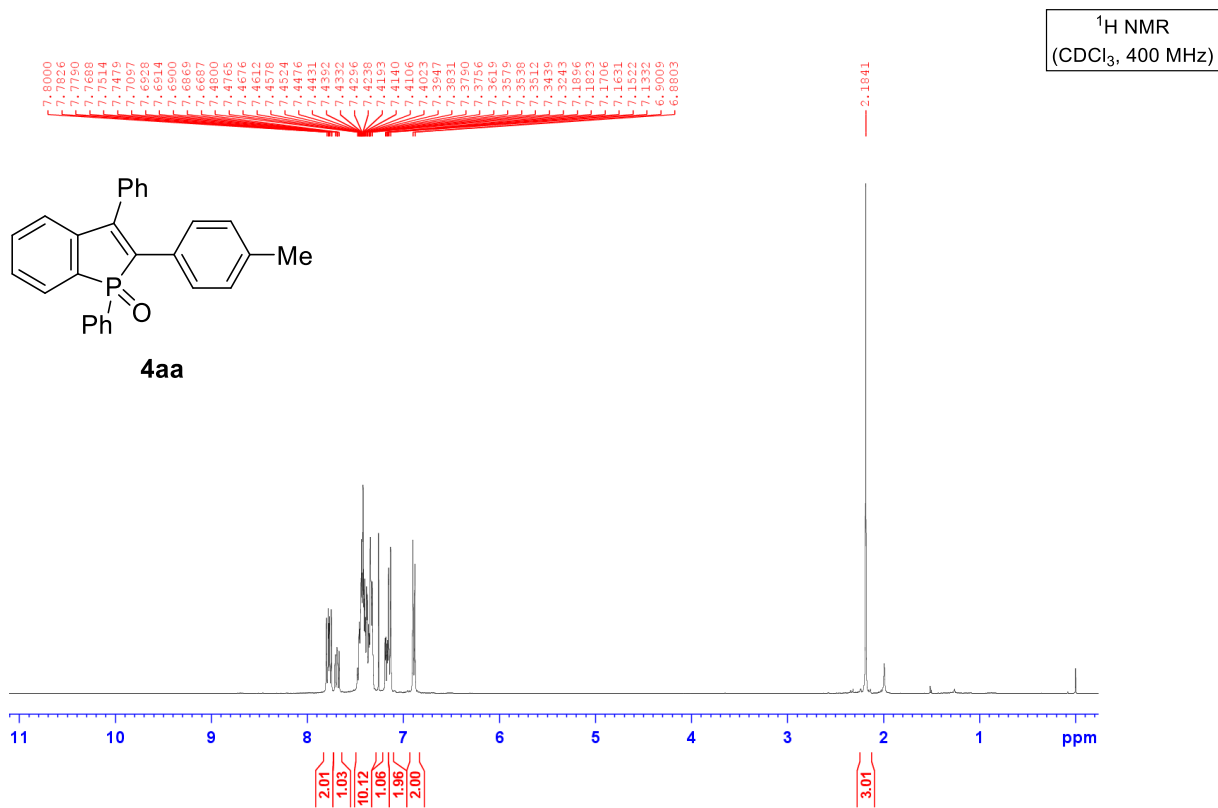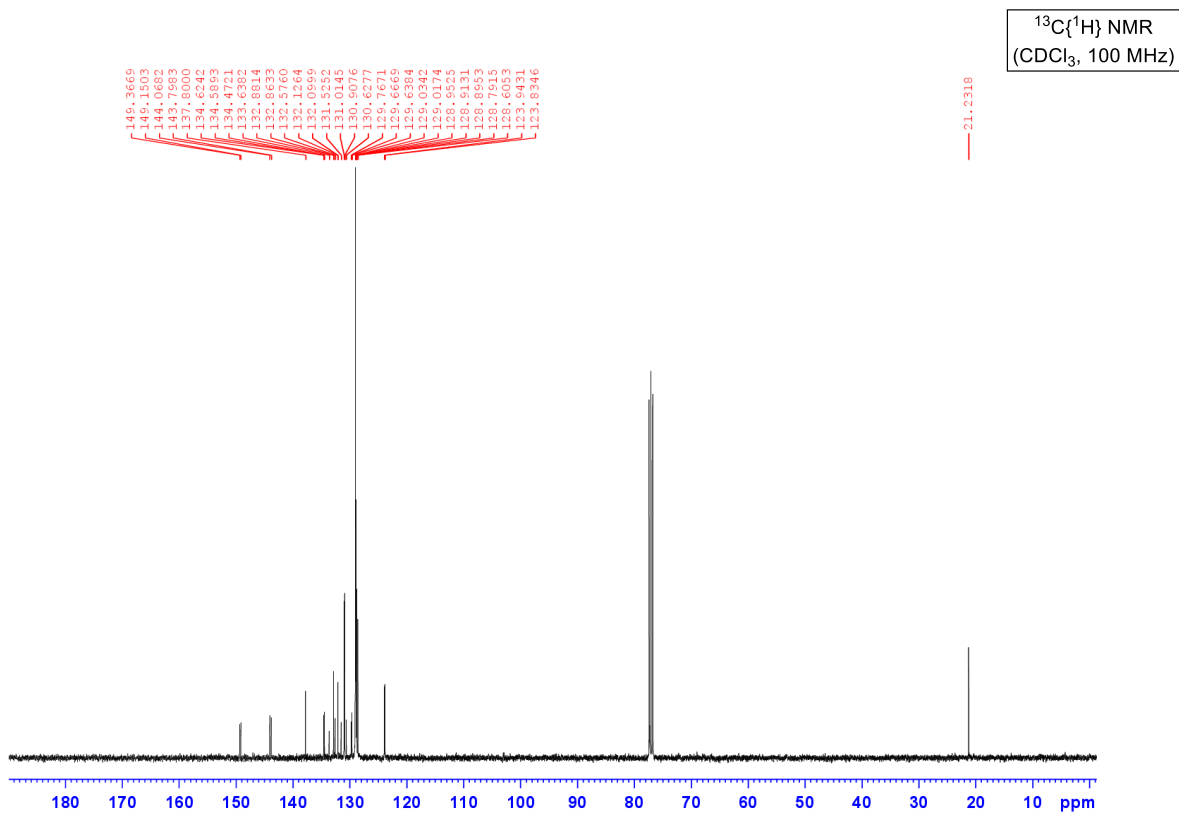

$^{31}\text{P}\{^1\text{H}\}$  NMR  
( $\text{CDCl}_3$ , 162 MHz)

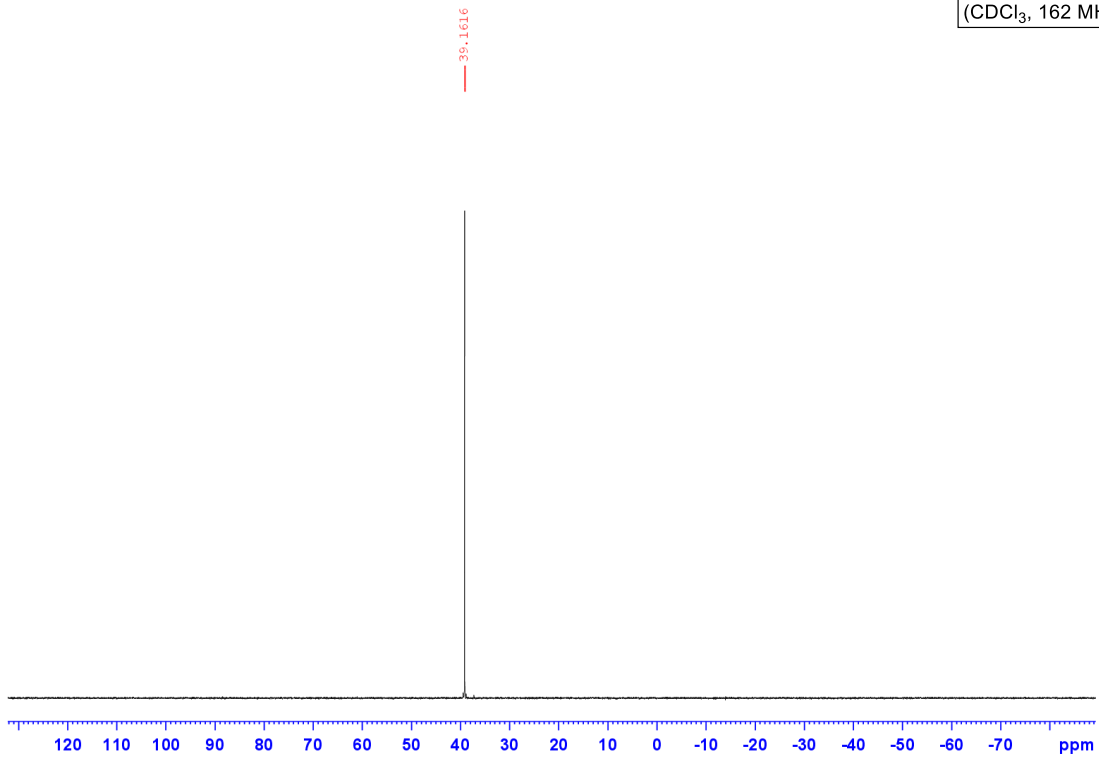

[<sup>1</sup>H, <sup>13</sup>C{<sup>1</sup>H}, and <sup>31</sup>P{<sup>1</sup>H} NMR Spectra of **4ab**]

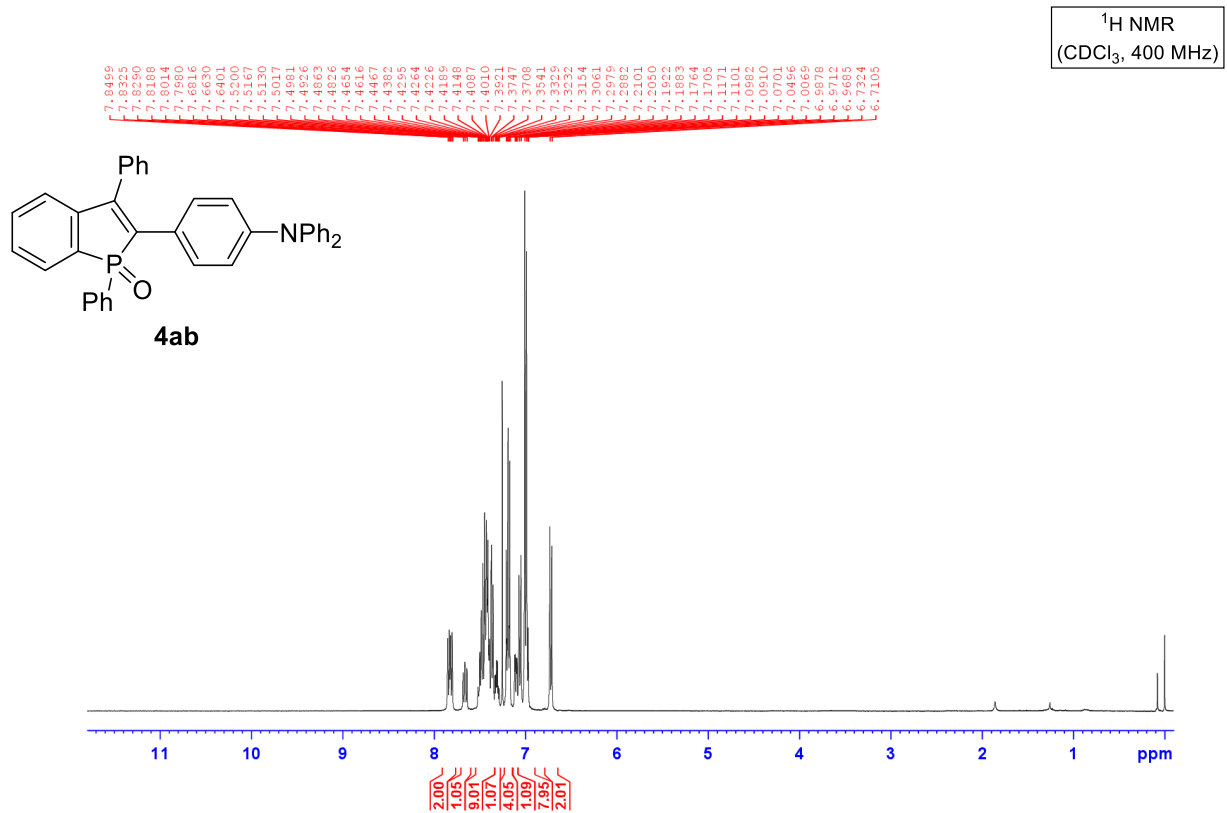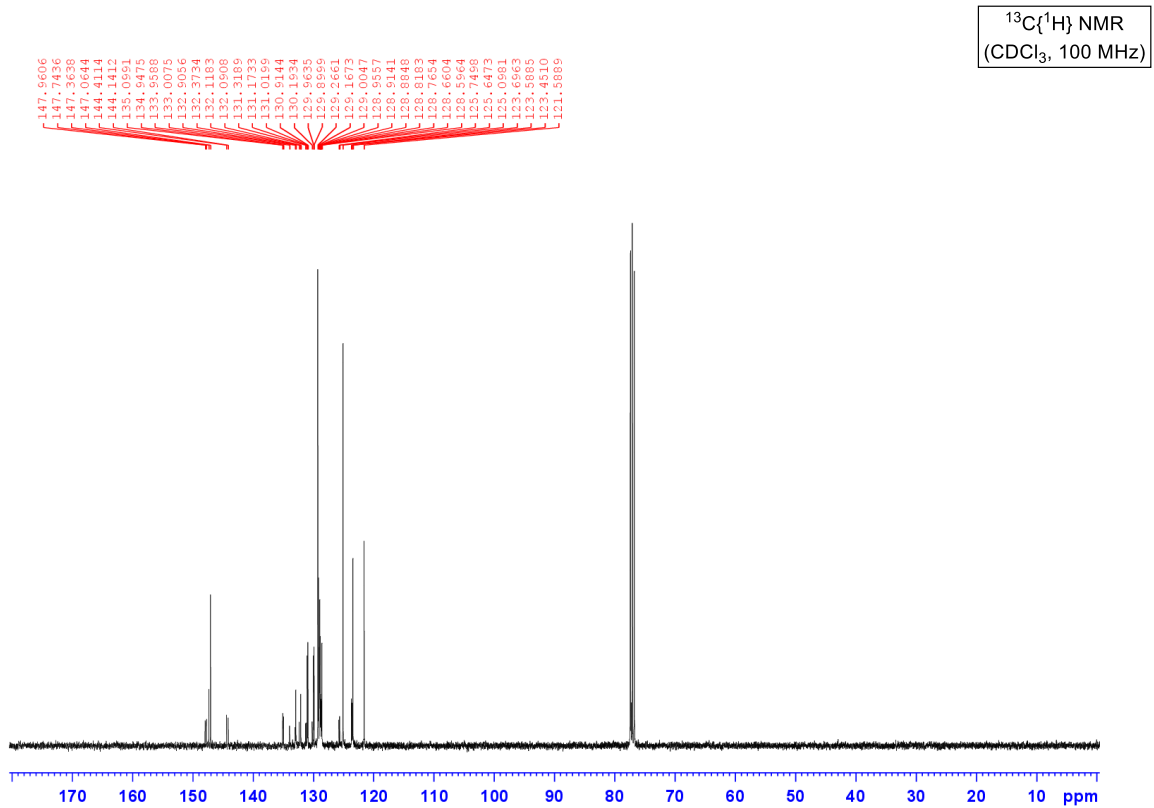

$^{31}\text{P}\{^1\text{H}\}$  NMR  
( $\text{CDCl}_3$ , 162 MHz)

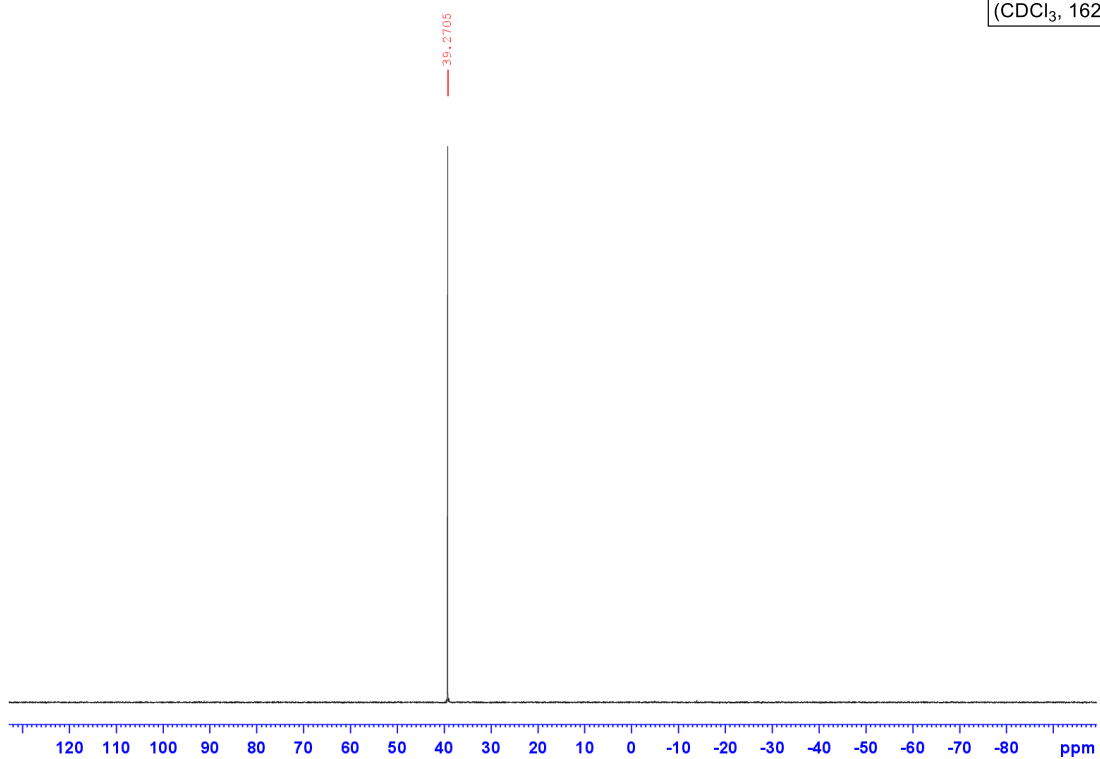

[<sup>1</sup>H, <sup>13</sup>C{<sup>1</sup>H}, and <sup>31</sup>P{<sup>1</sup>H} NMR Spectra of **4ac**]

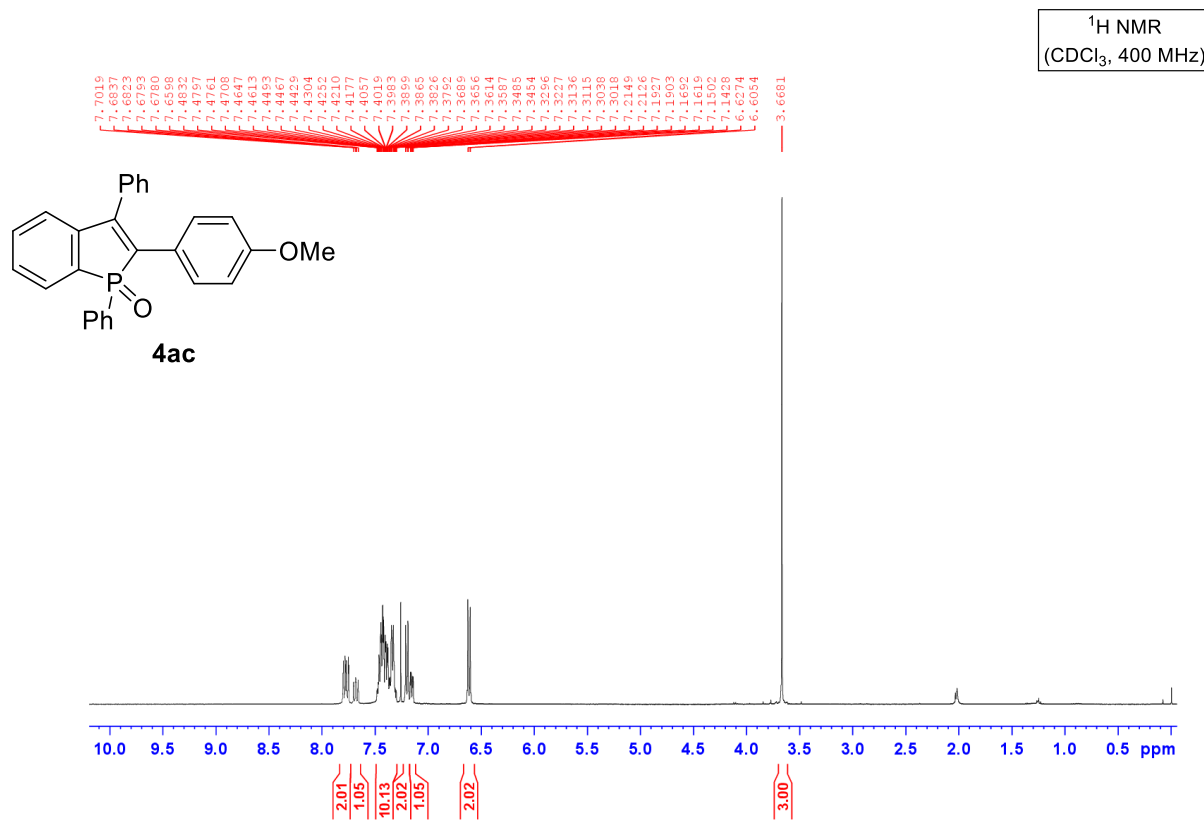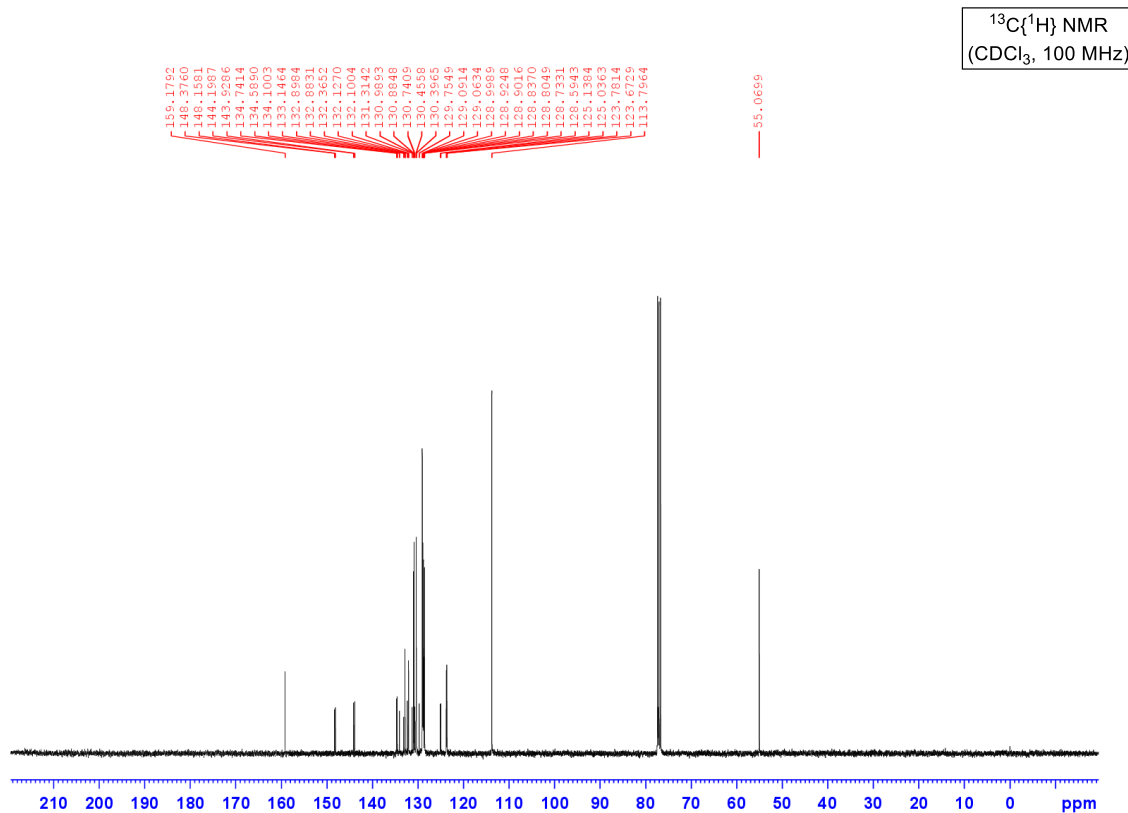



$^{31}\text{P}\{^1\text{H}\}$  NMR  
( $\text{CDCl}_3$ , 162 MHz)

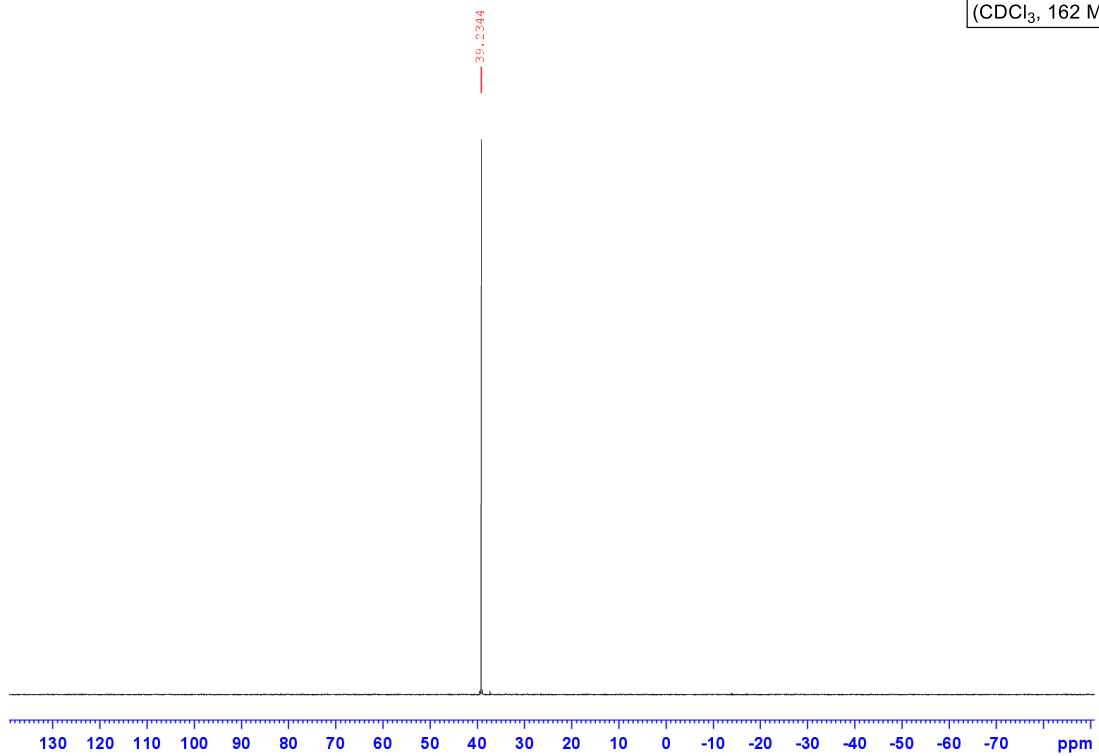

[<sup>1</sup>H, <sup>13</sup>C{<sup>1</sup>H}, and <sup>31</sup>P{<sup>1</sup>H} NMR Spectra of **4ad**]

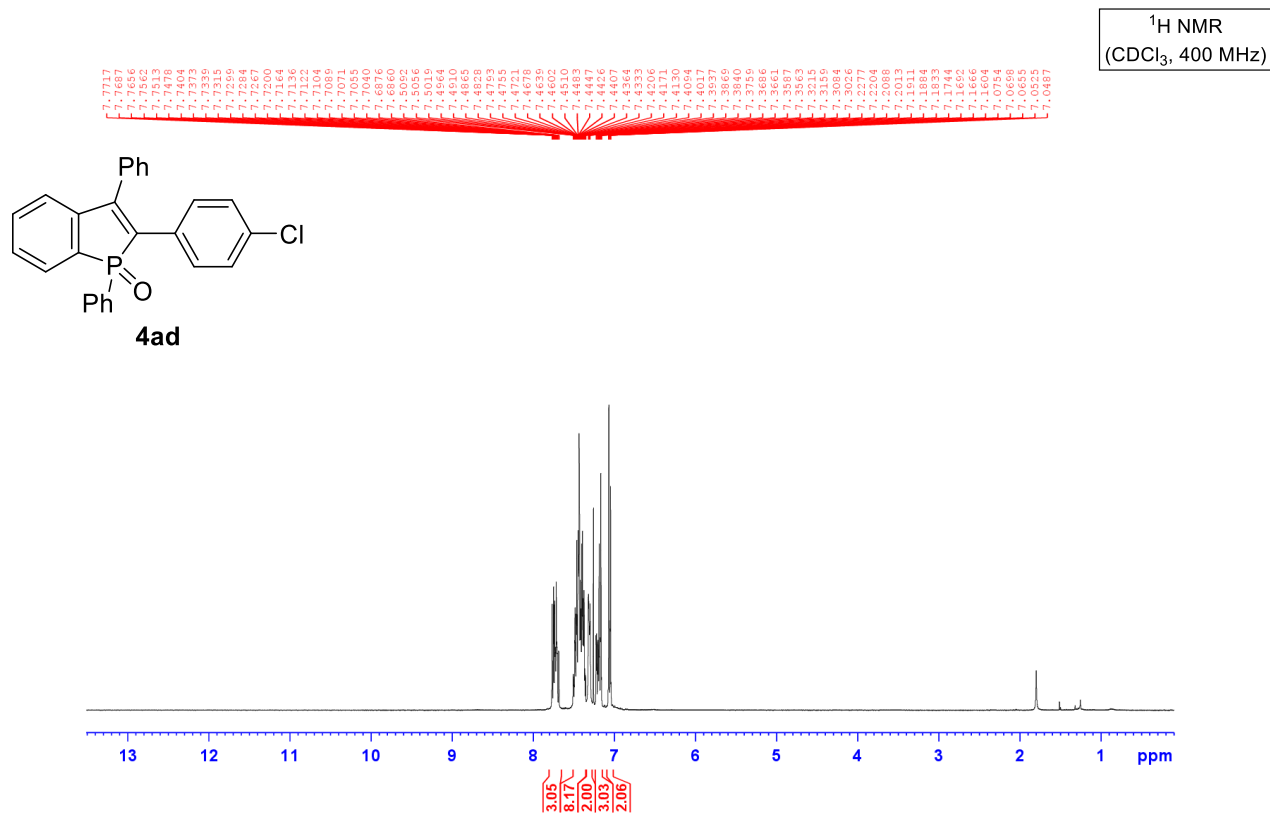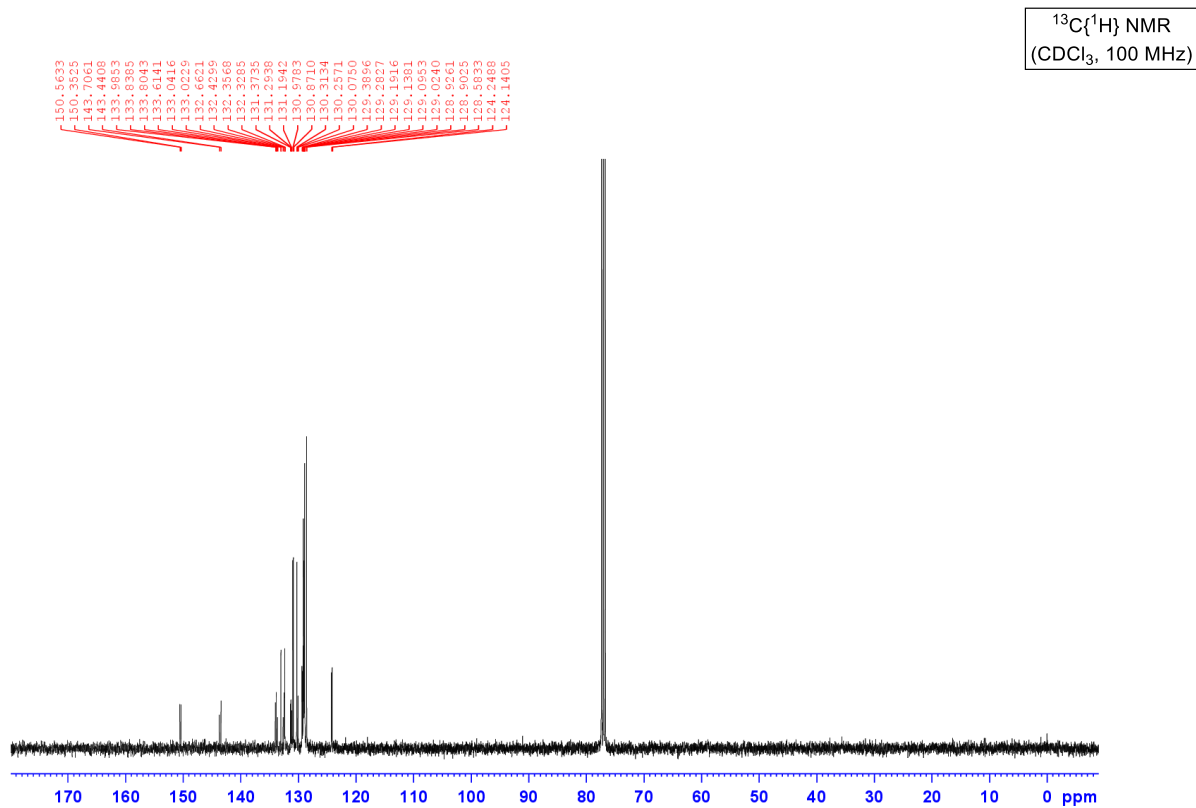

$^{31}\text{P}\{^1\text{H}\}$  NMR  
( $\text{CDCl}_3$ , 162 MHz)

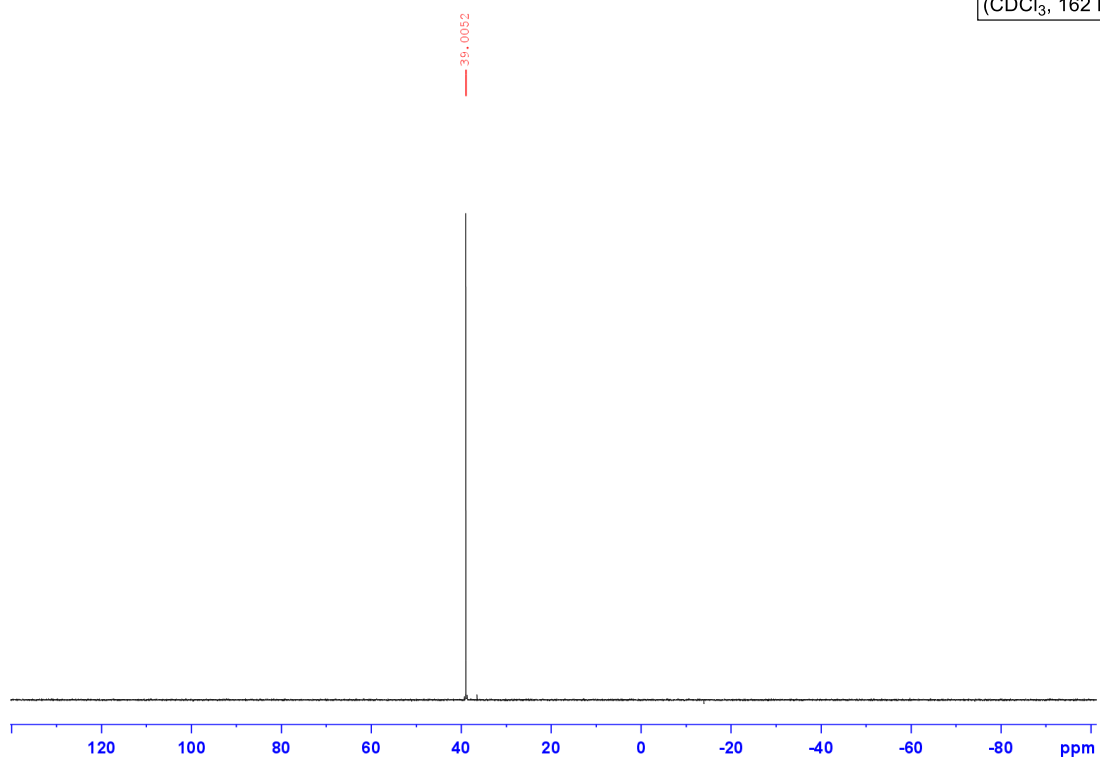

[<sup>1</sup>H, <sup>13</sup>C{<sup>1</sup>H}, <sup>19</sup>F{<sup>1</sup>H}, and <sup>31</sup>P{<sup>1</sup>H} NMR Spectra of **4ae**]

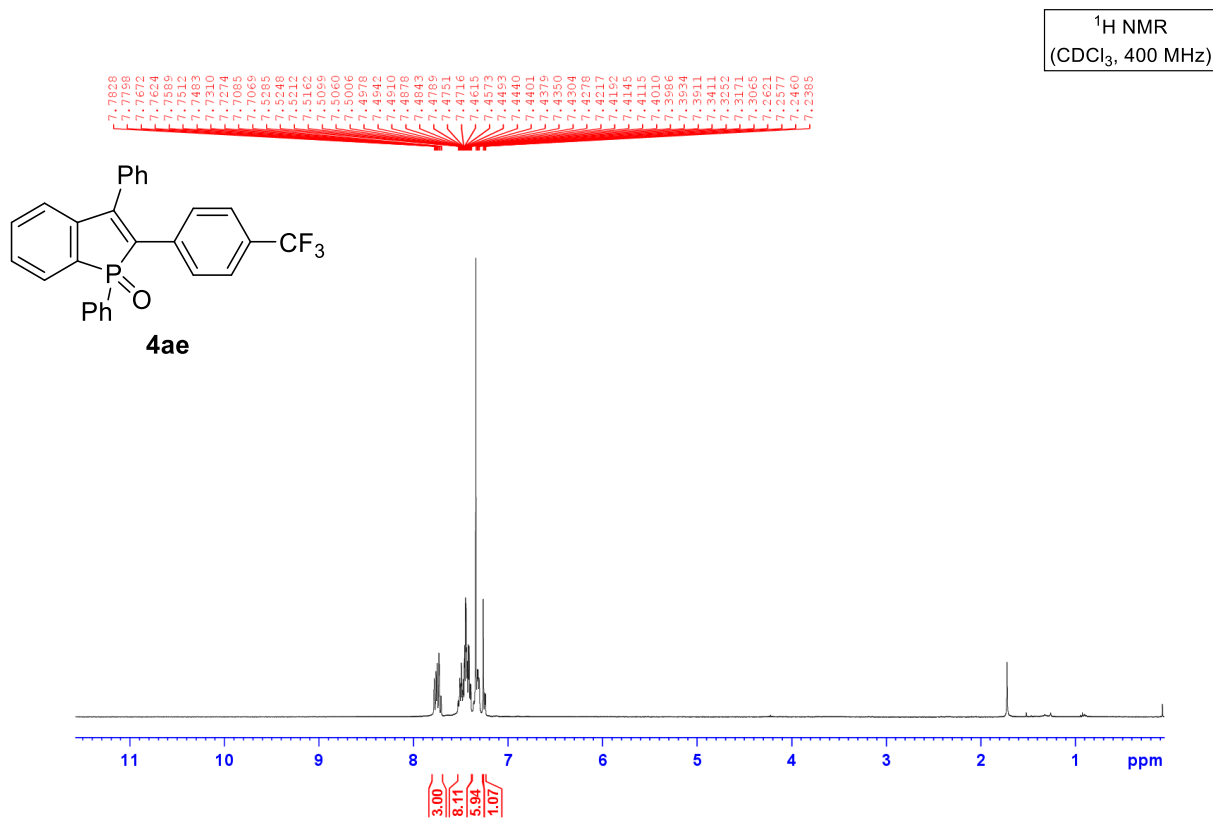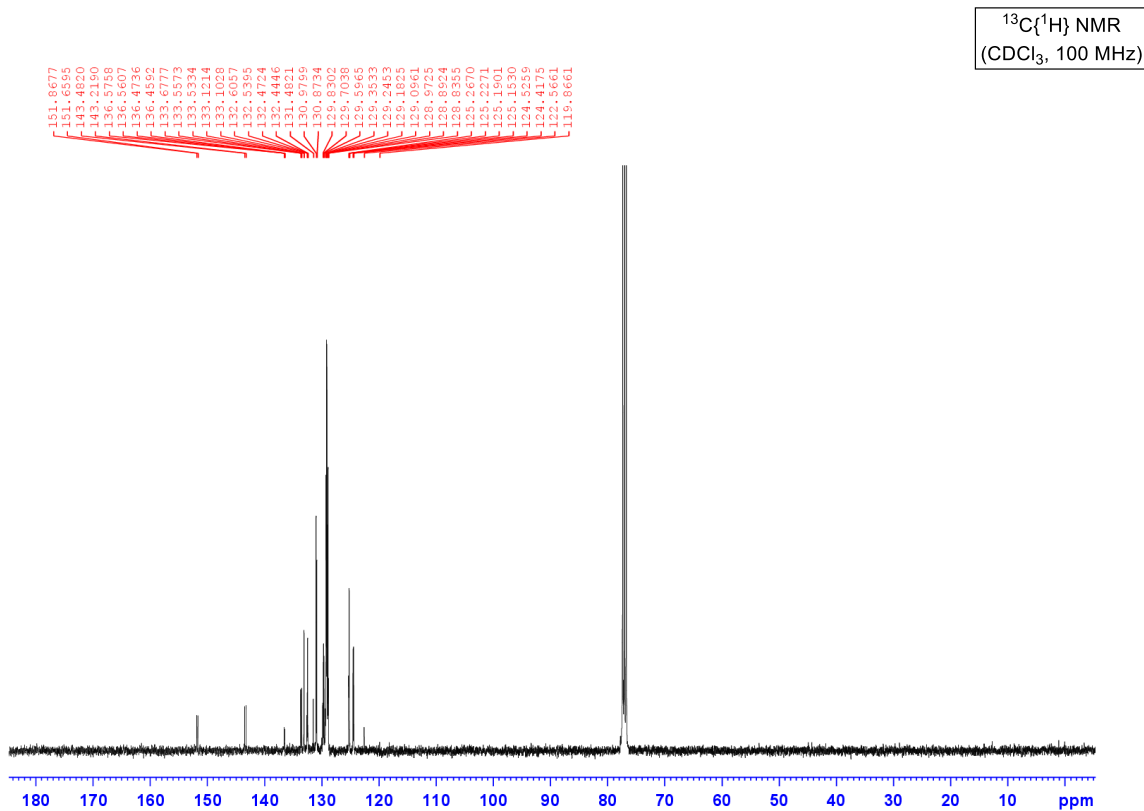

$^{19}\text{F}\{^1\text{H}\}$  NMR  
( $\text{CDCl}_3$ , 376 MHz)

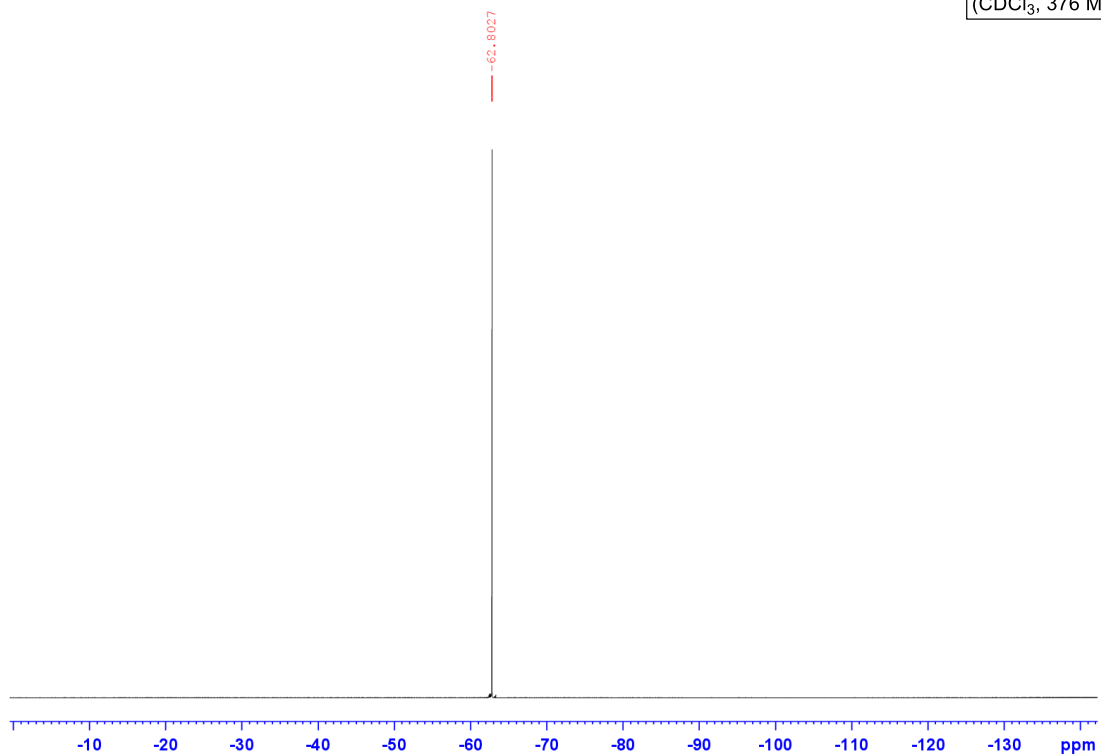

$^{31}\text{P}\{^1\text{H}\}$  NMR  
( $\text{CDCl}_3$ , 162 MHz)

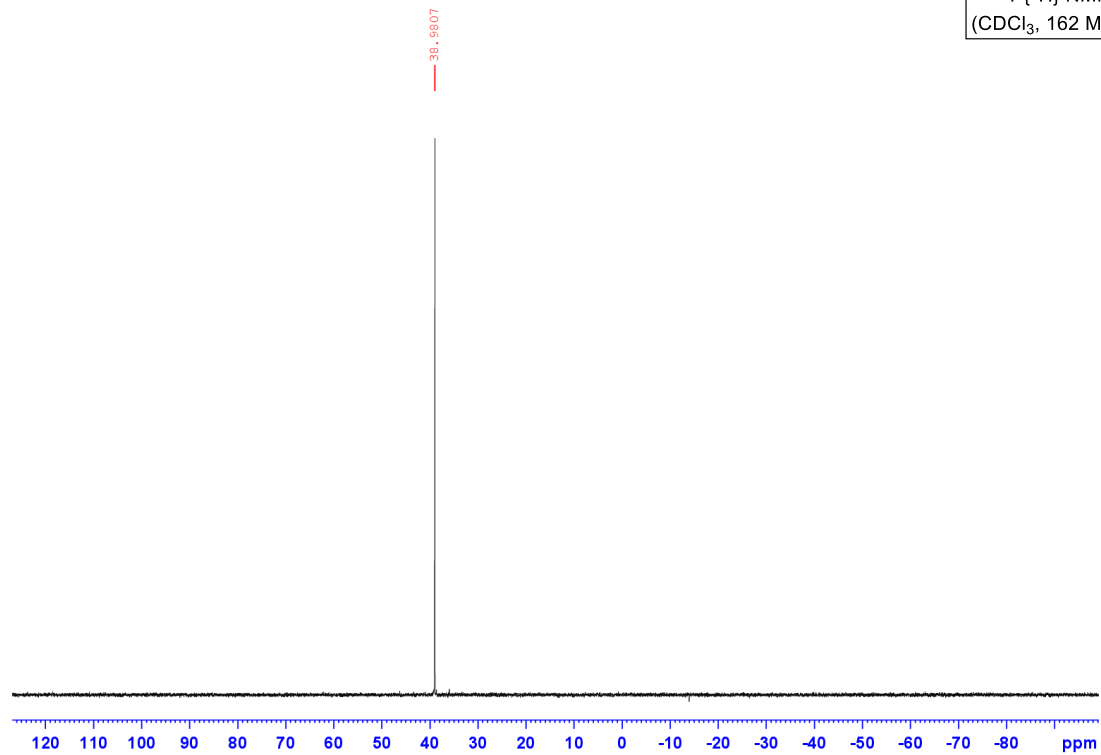

[<sup>1</sup>H, <sup>13</sup>C{<sup>1</sup>H}, and <sup>31</sup>P{<sup>1</sup>H} NMR Spectra of **4af**]

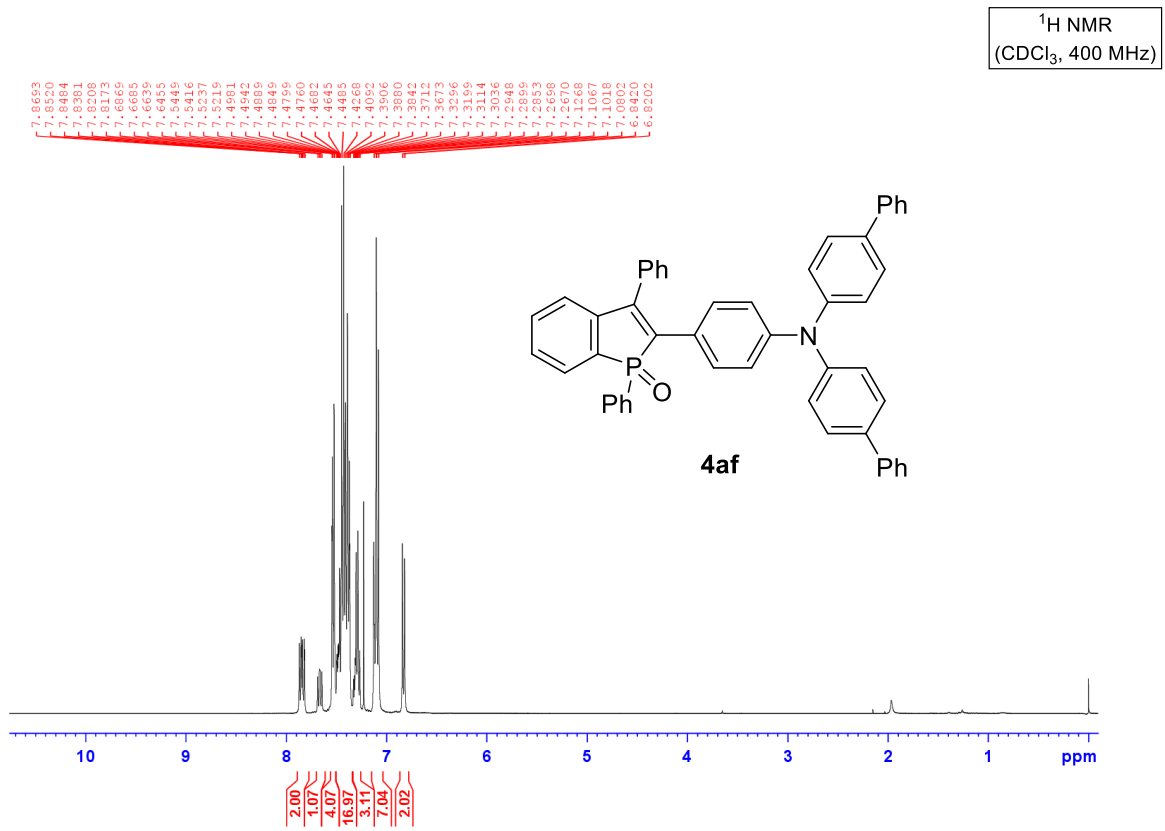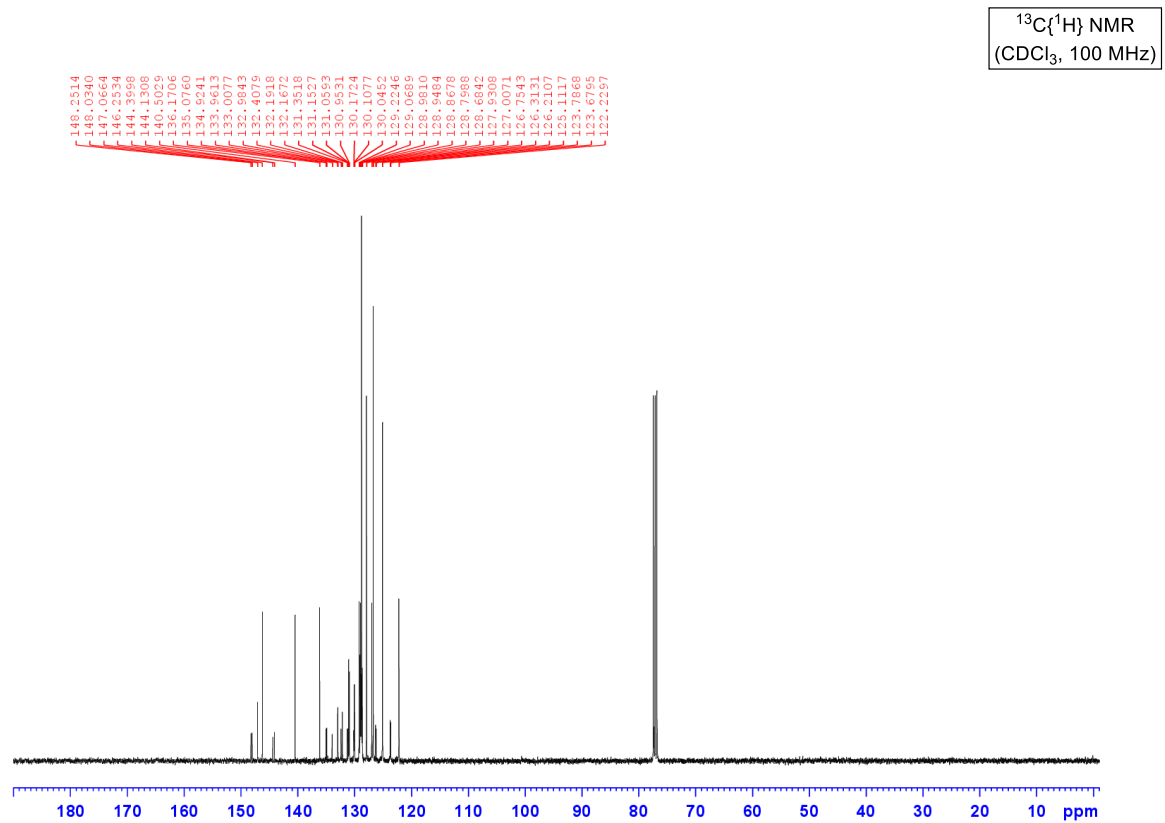

$^{31}\text{P}\{^1\text{H}\}$  NMR  
( $\text{CDCl}_3$ , 162 MHz)

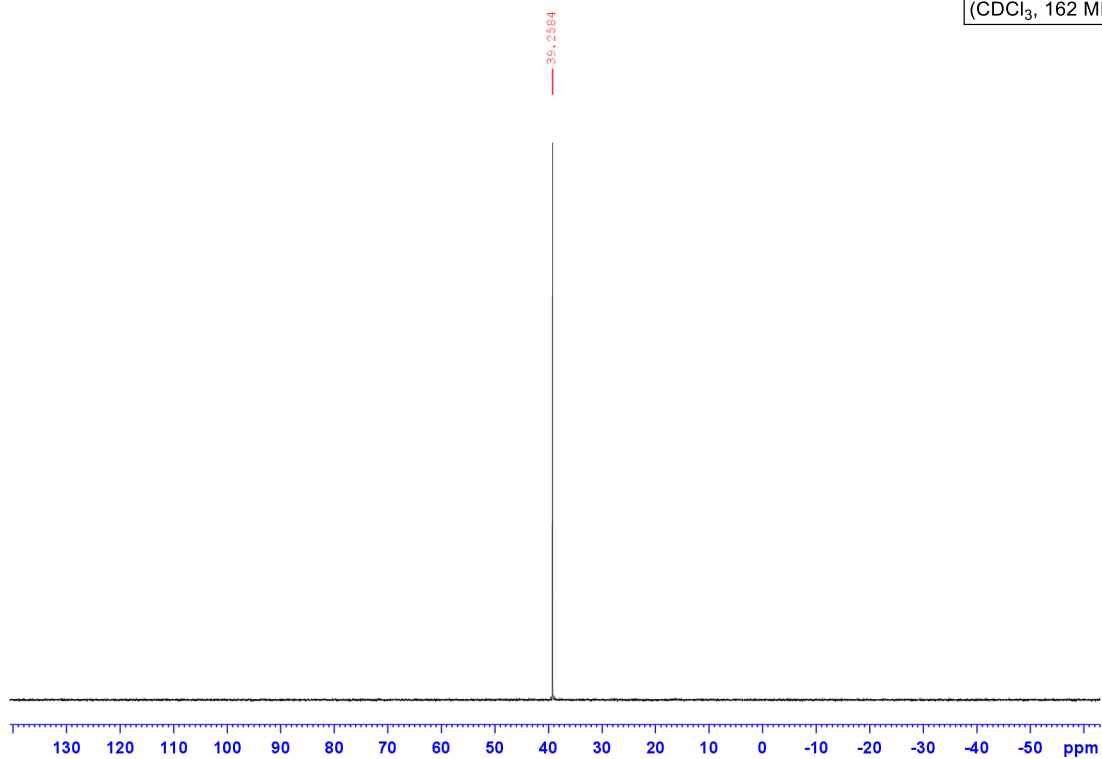

[<sup>1</sup>H, <sup>13</sup>C{<sup>1</sup>H}, and <sup>31</sup>P{<sup>1</sup>H} NMR Spectra of **4ag**]

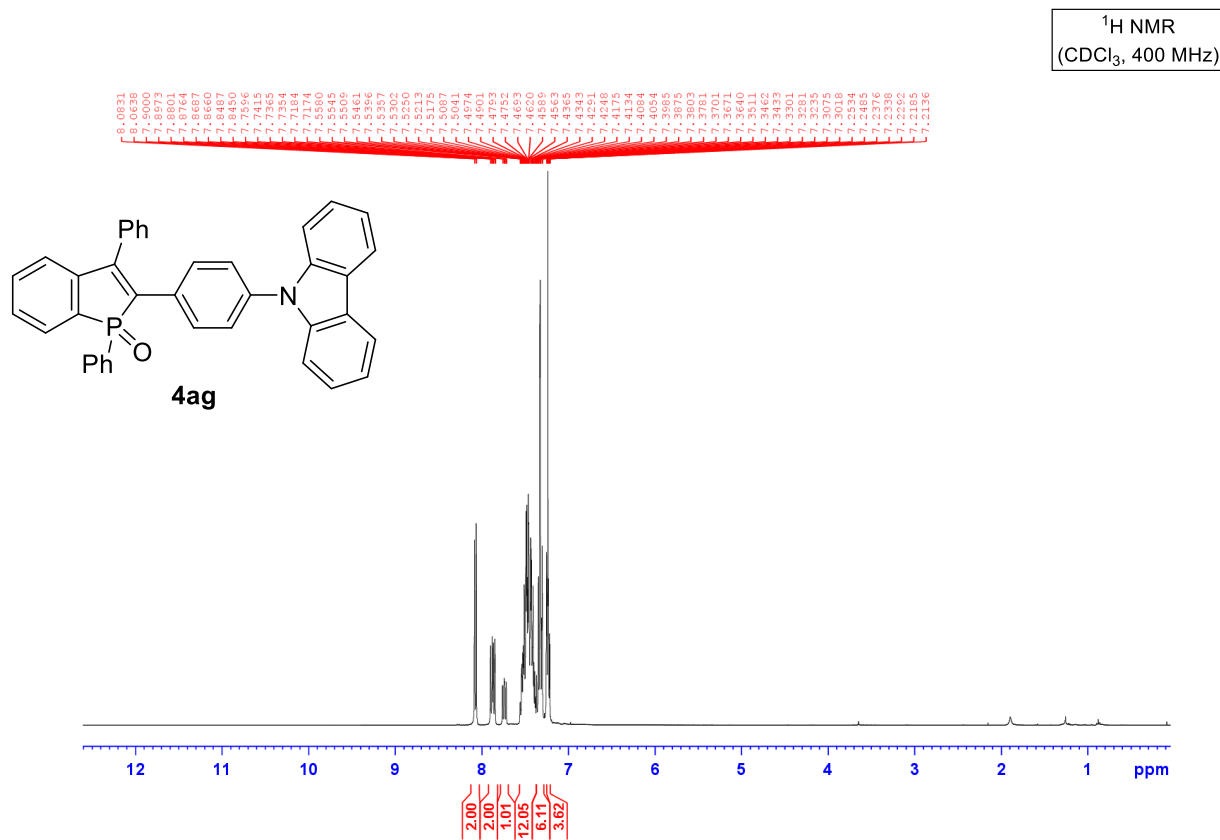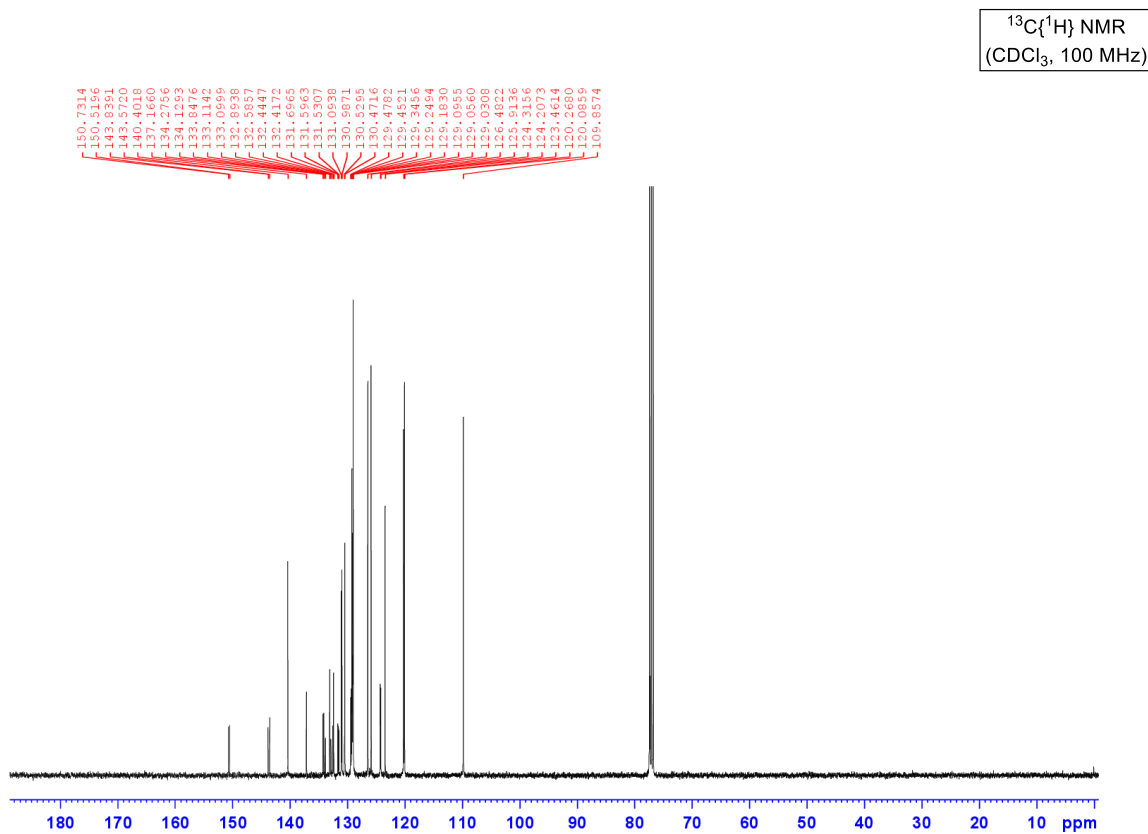



$^{31}\text{P}\{^1\text{H}\}$  NMR  
( $\text{CDCl}_3$ , 162 MHz)

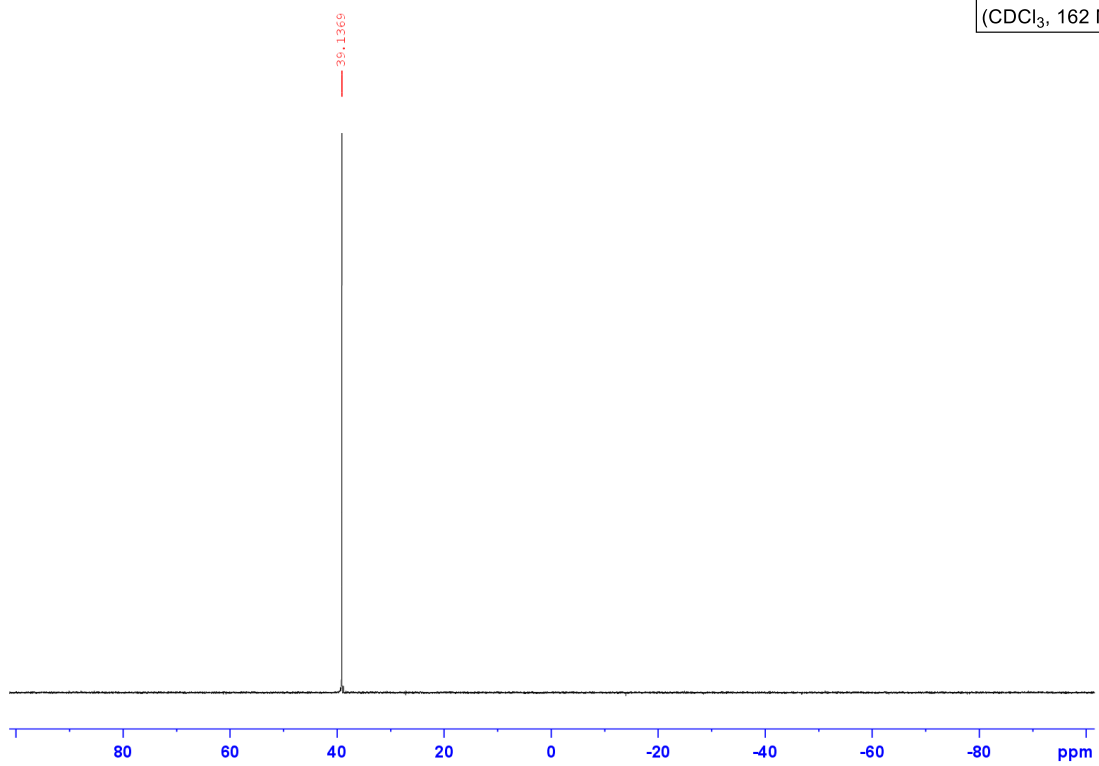

[<sup>1</sup>H, <sup>13</sup>C{<sup>1</sup>H}, and <sup>31</sup>P{<sup>1</sup>H} NMR Spectra of **4ah**]

<sup>1</sup>H NMR  
(CDCl<sub>3</sub>, 400 MHz)

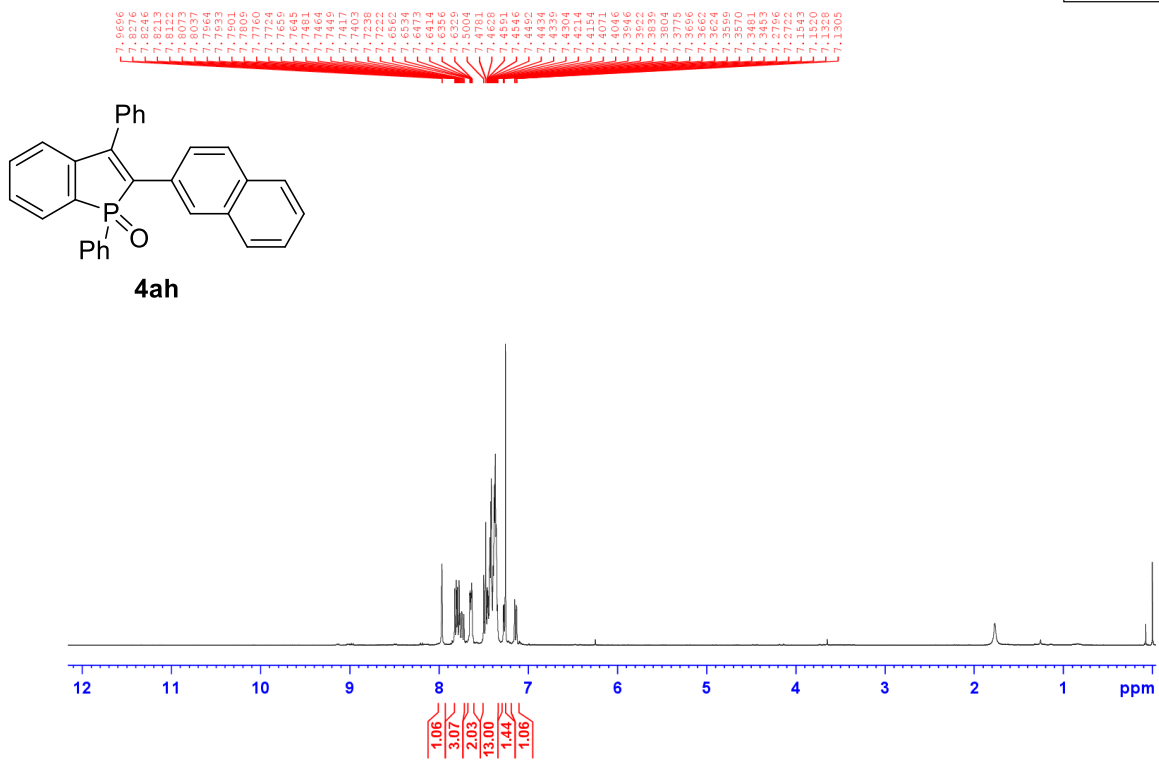

<sup>13</sup>C{<sup>1</sup>H} NMR  
(CDCl<sub>3</sub>, 100 MHz)

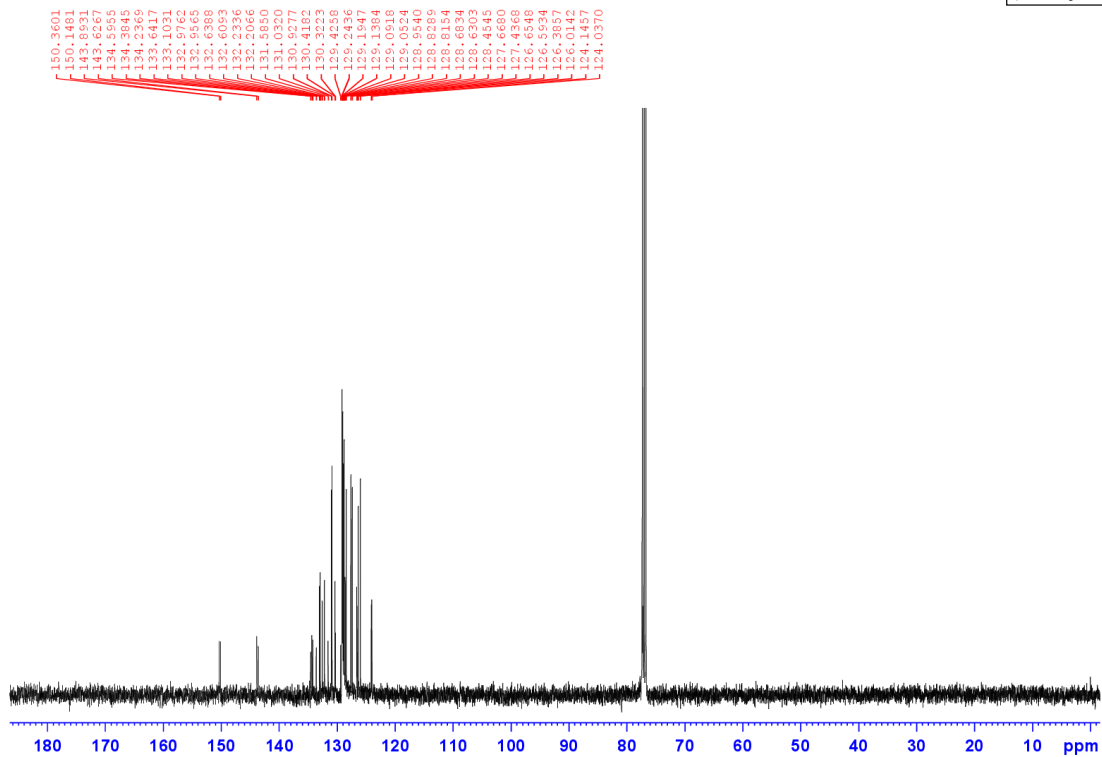

$^{31}\text{P}\{^1\text{H}\}$  NMR  
( $\text{CDCl}_3$ , 162 MHz)

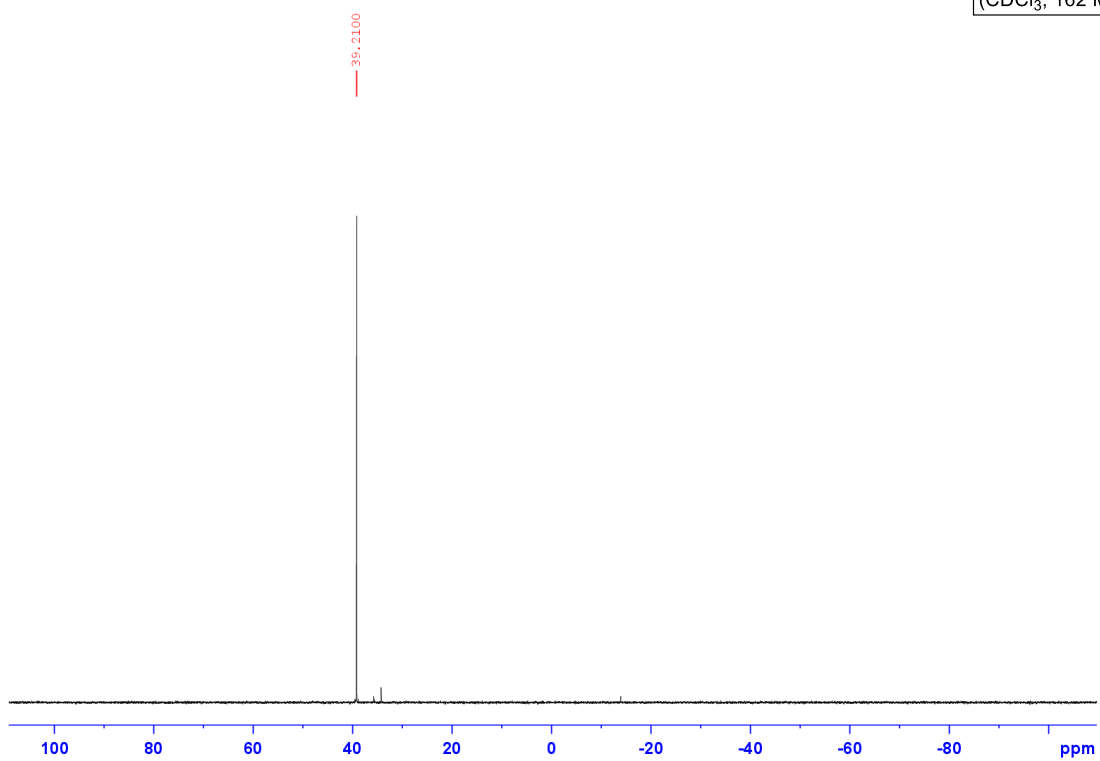



$^{31}\text{P}\{^1\text{H}\}$  NMR  
( $\text{CDCl}_3$ , 162 MHz)

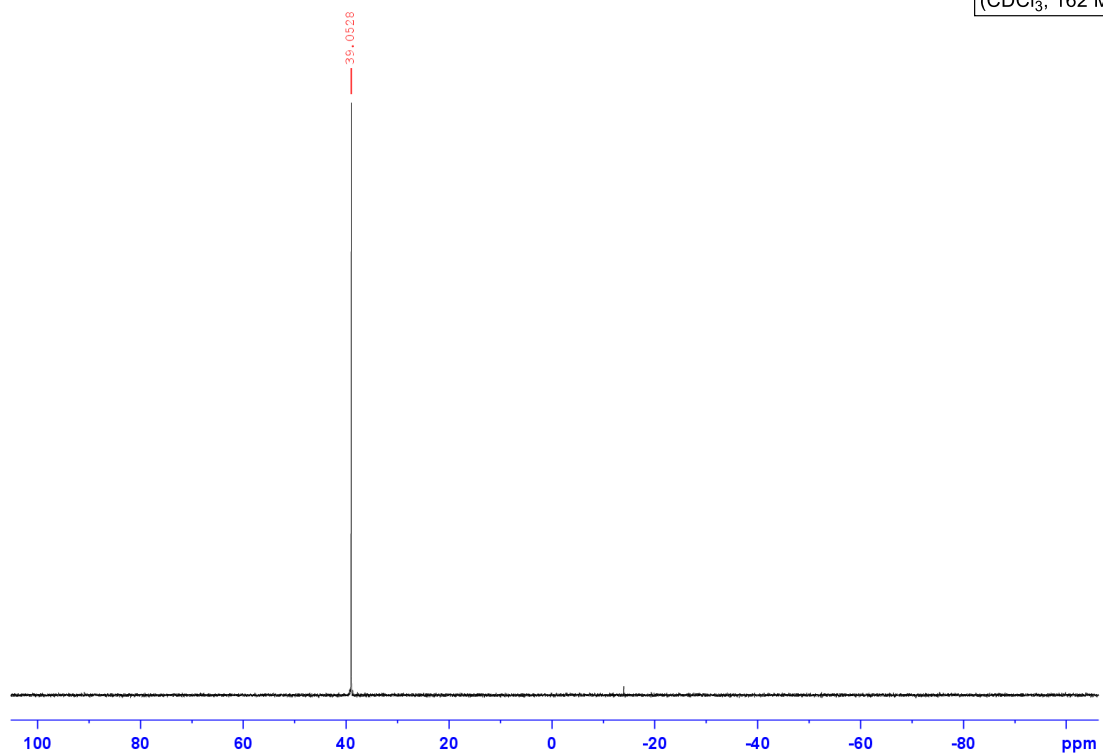

[<sup>1</sup>H, <sup>13</sup>C{<sup>1</sup>H}, and <sup>31</sup>P{<sup>1</sup>H} NMR Spectra of **4aj**]

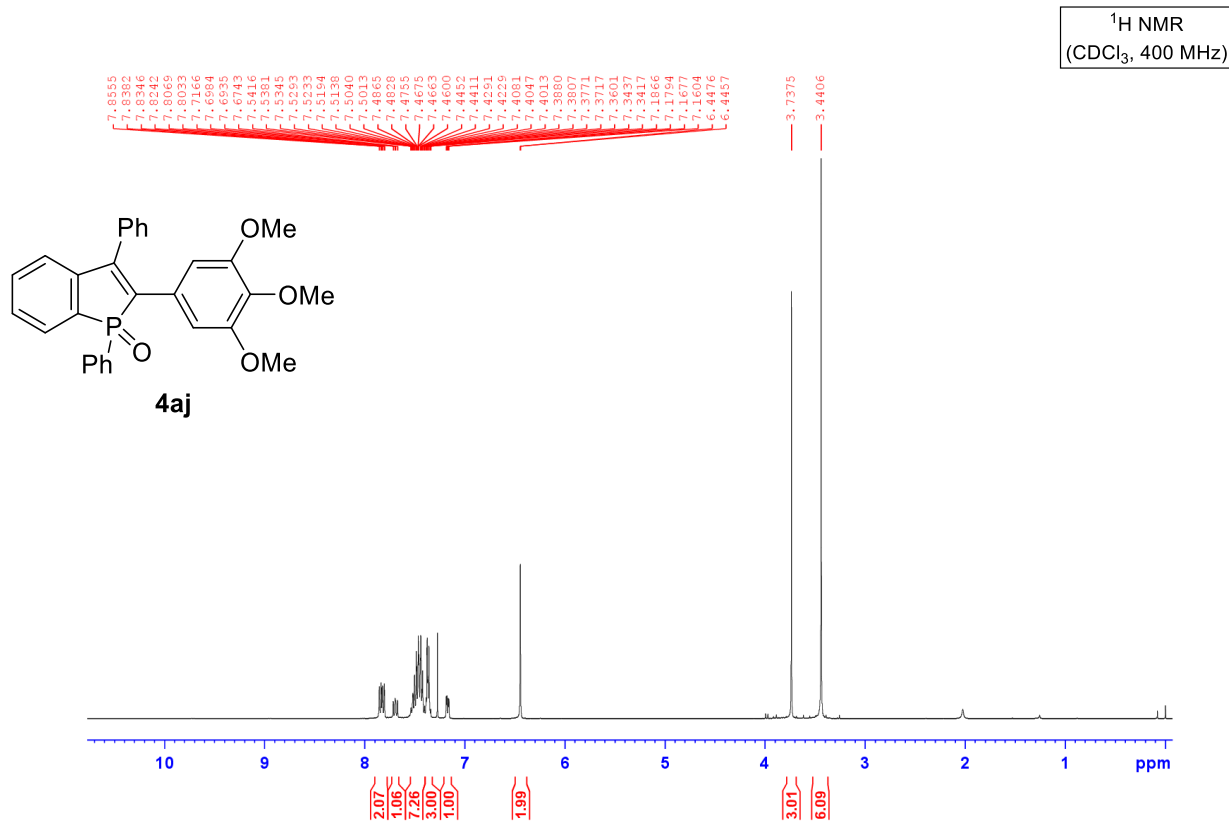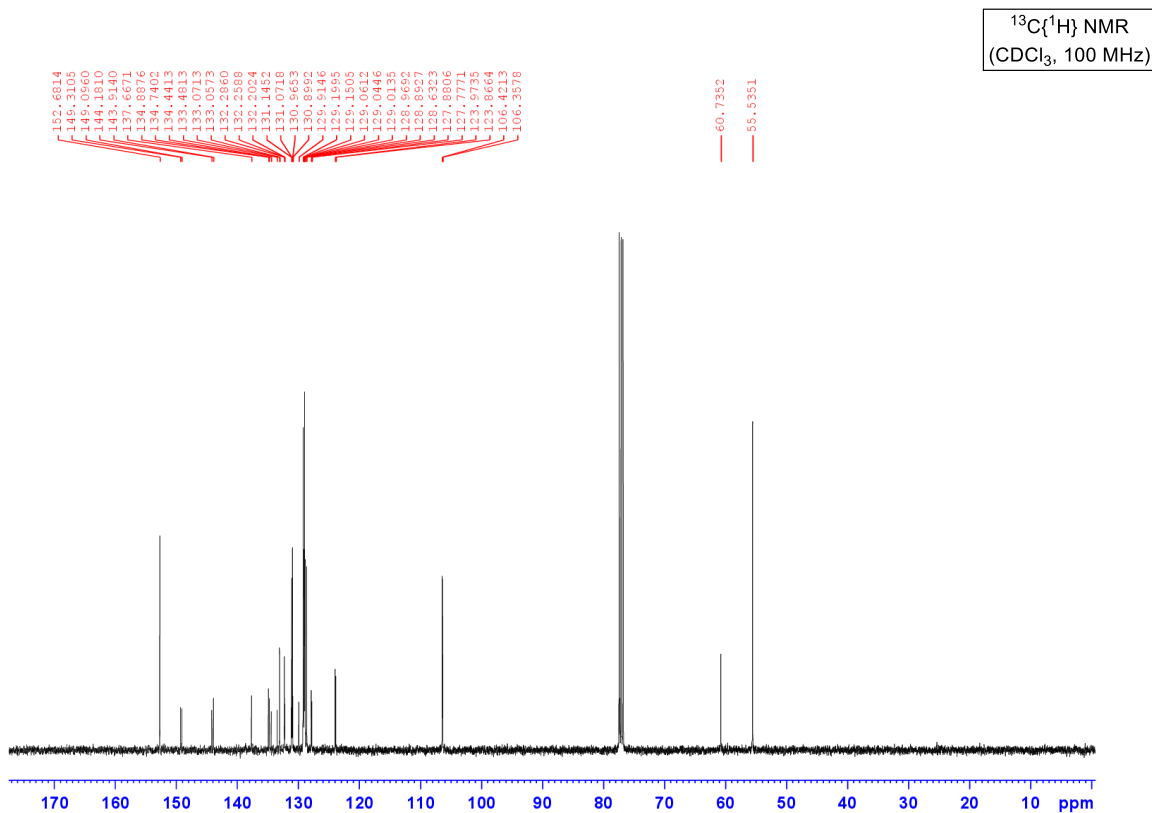

$^{31}\text{P}\{^1\text{H}\}$  NMR  
( $\text{CDCl}_3$ , 162 MHz)

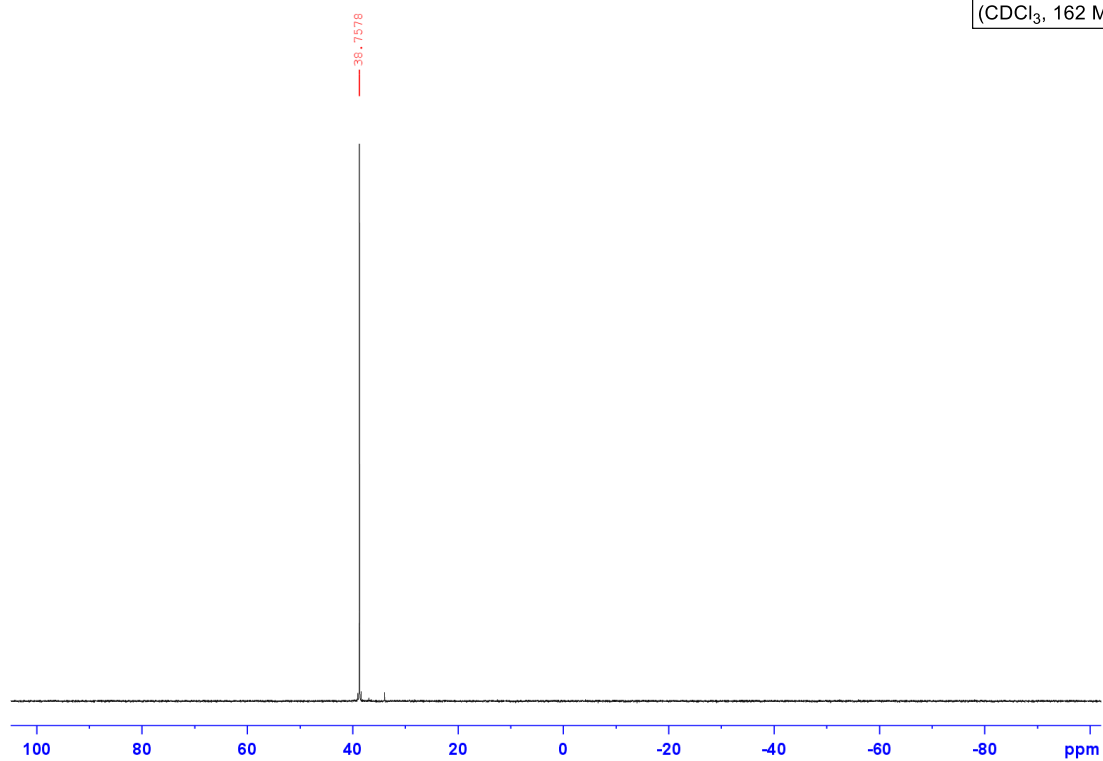

[<sup>1</sup>H, <sup>13</sup>C{<sup>1</sup>H}, and <sup>31</sup>P{<sup>1</sup>H} NMR Spectra of **4ak**]

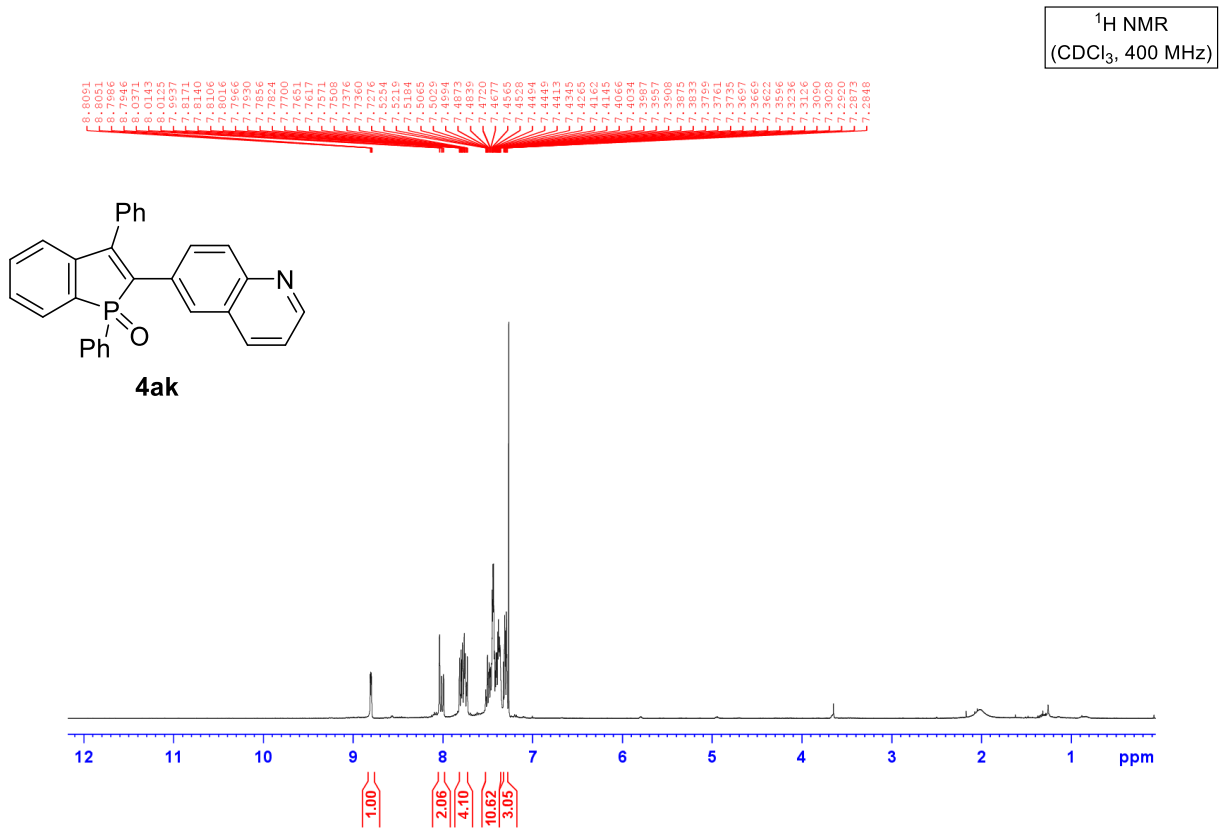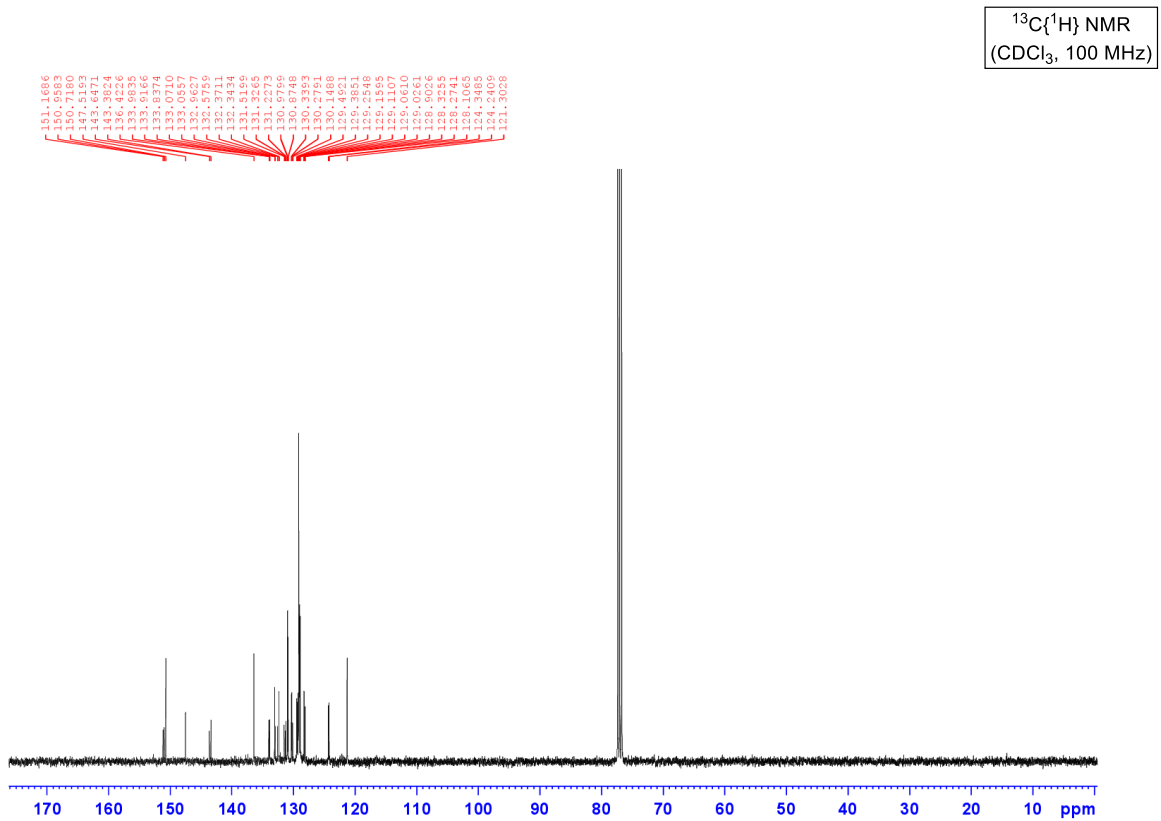



$^{31}\text{P}\{^1\text{H}\}$  NMR  
( $\text{CDCl}_3$ , 162 MHz)

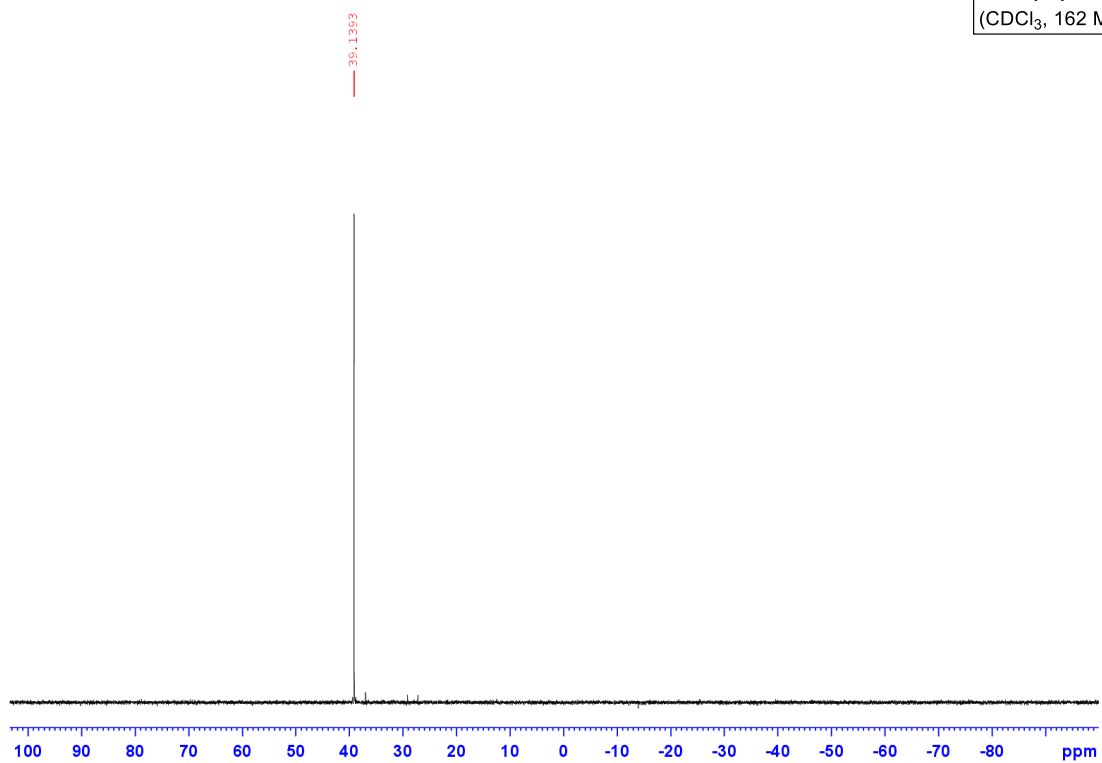

[<sup>1</sup>H, <sup>13</sup>C{<sup>1</sup>H}, and <sup>31</sup>P{<sup>1</sup>H} NMR Spectra of **4al**]

<sup>1</sup>H NMR  
(CDCl<sub>3</sub>, 400 MHz)

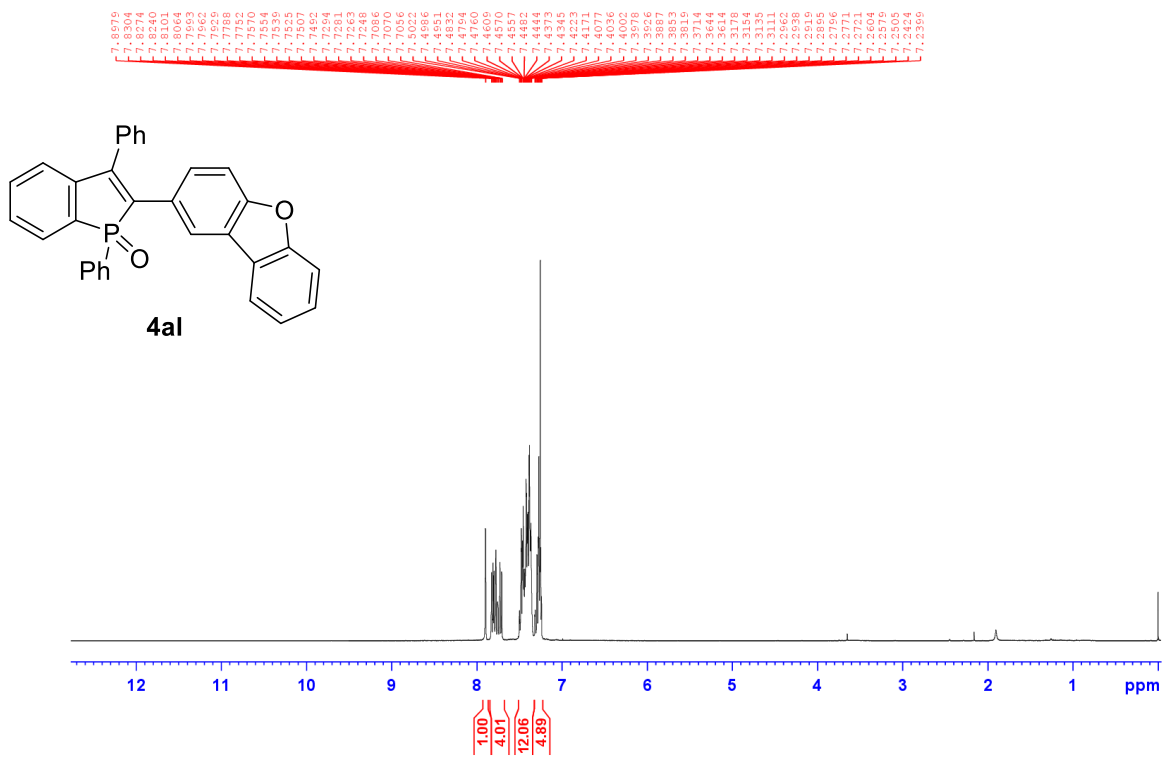

<sup>13</sup>C{<sup>1</sup>H} NMR  
(CDCl<sub>3</sub>, 100 MHz)

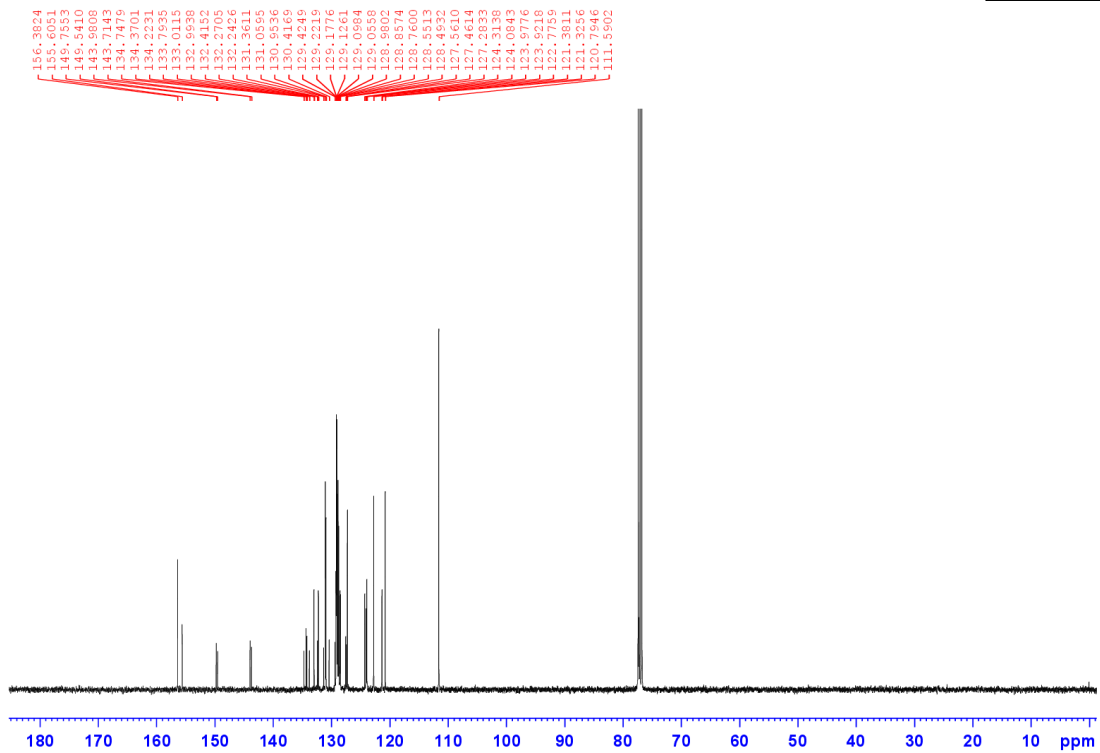

$^{31}\text{P}\{^1\text{H}\}$  NMR  
( $\text{CDCl}_3$ , 162 MHz)

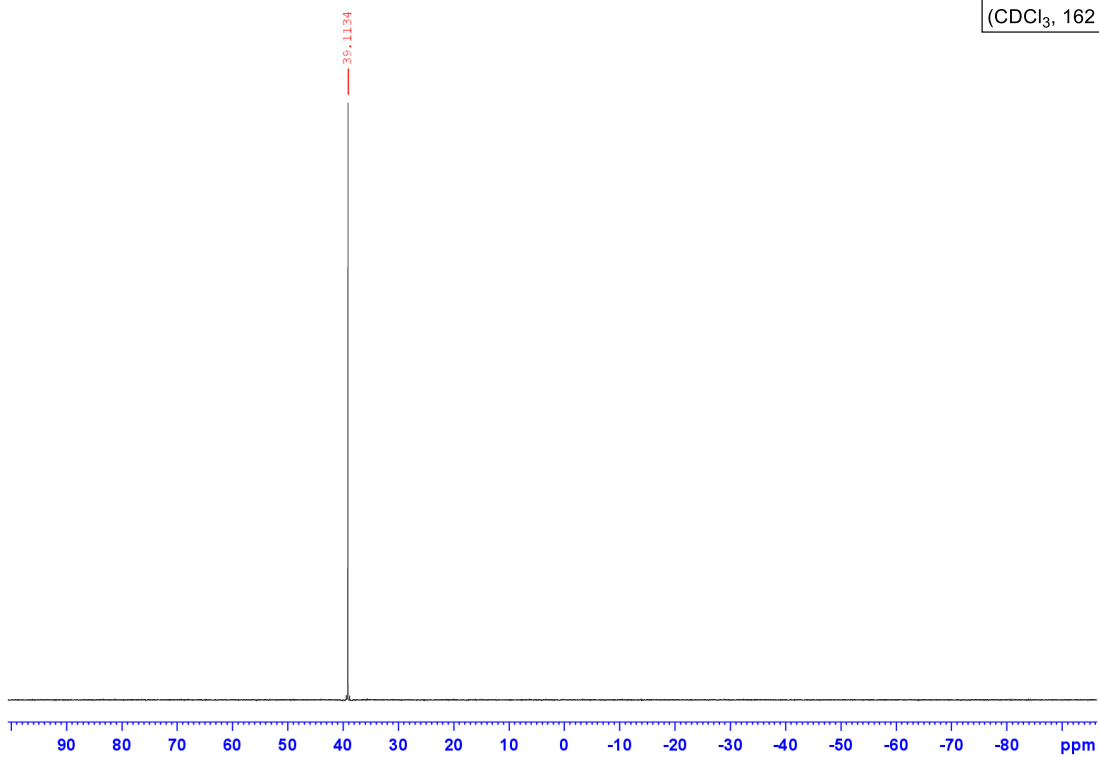

[<sup>1</sup>H, <sup>13</sup>C{<sup>1</sup>H}, and <sup>31</sup>P{<sup>1</sup>H} NMR Spectra of **4am**]

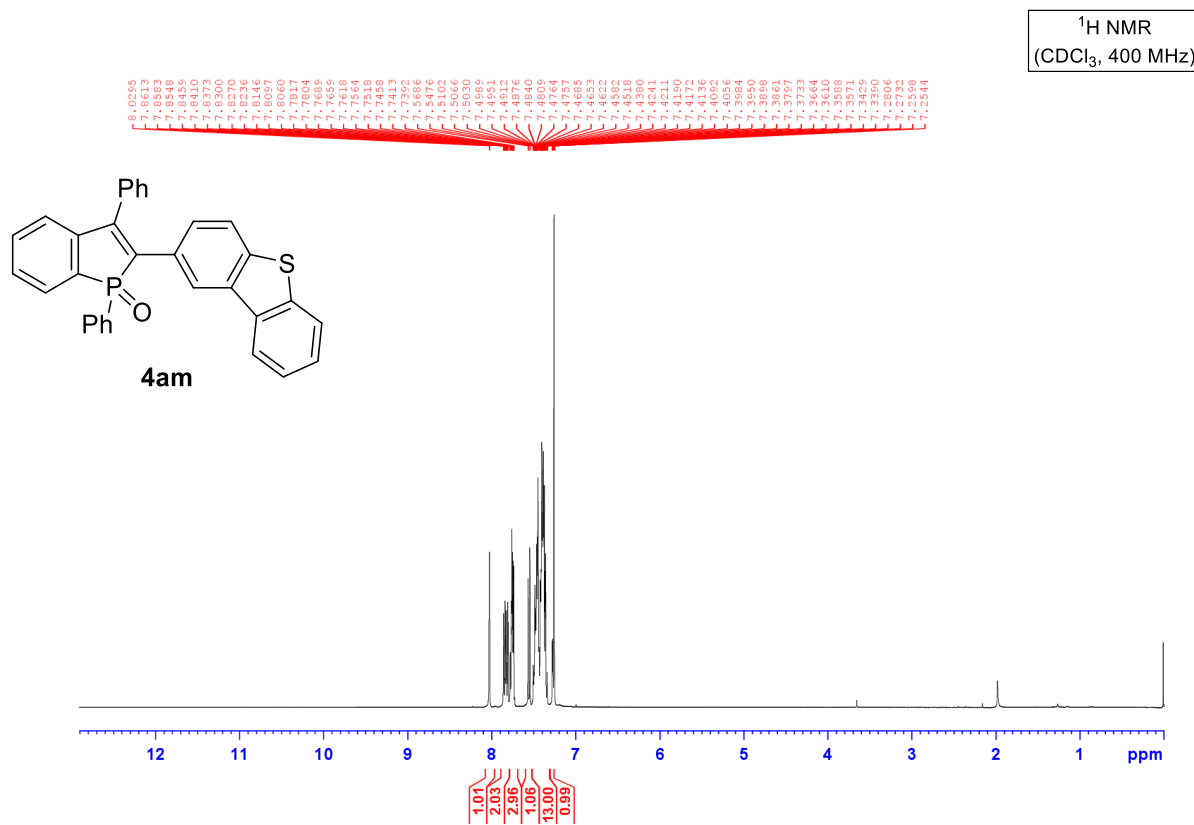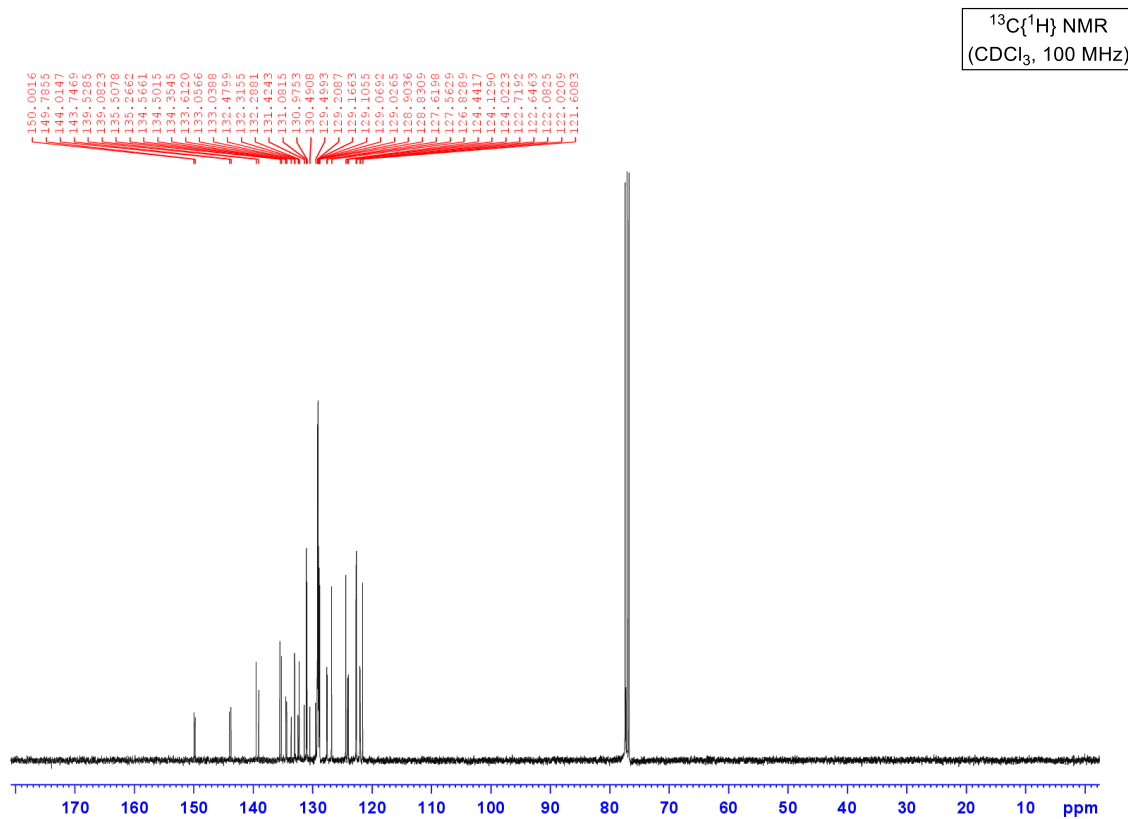

$^{31}\text{P}\{^1\text{H}\}$  NMR  
( $\text{CDCl}_3$ , 162 MHz)

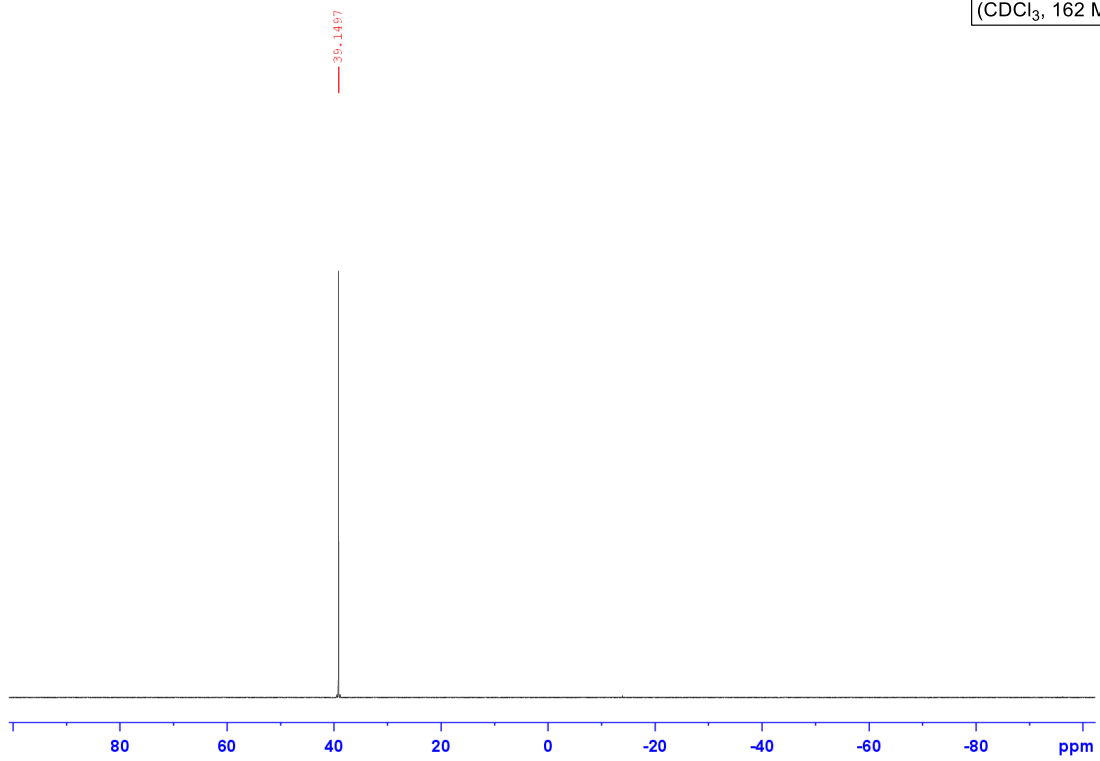

[<sup>1</sup>H, <sup>13</sup>C{<sup>1</sup>H}, and <sup>31</sup>P{<sup>1</sup>H} NMR Spectra of **4an**]

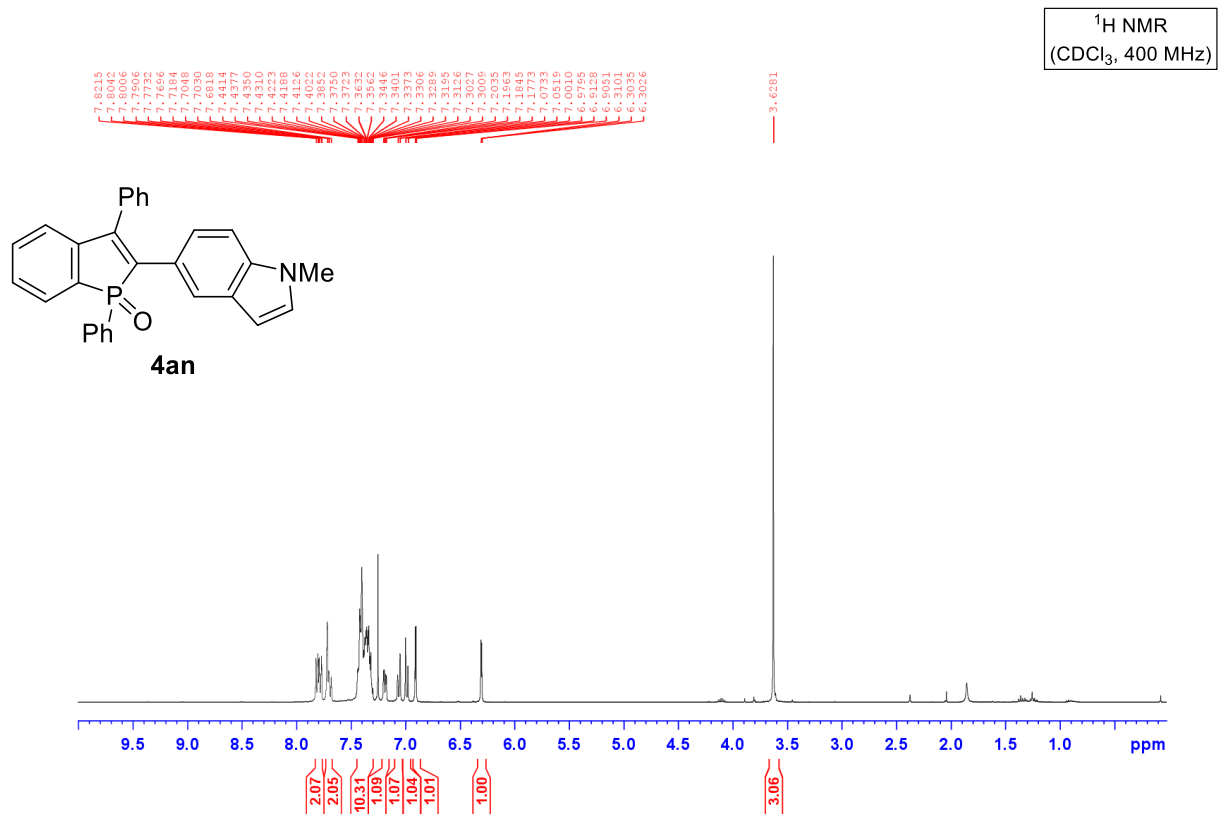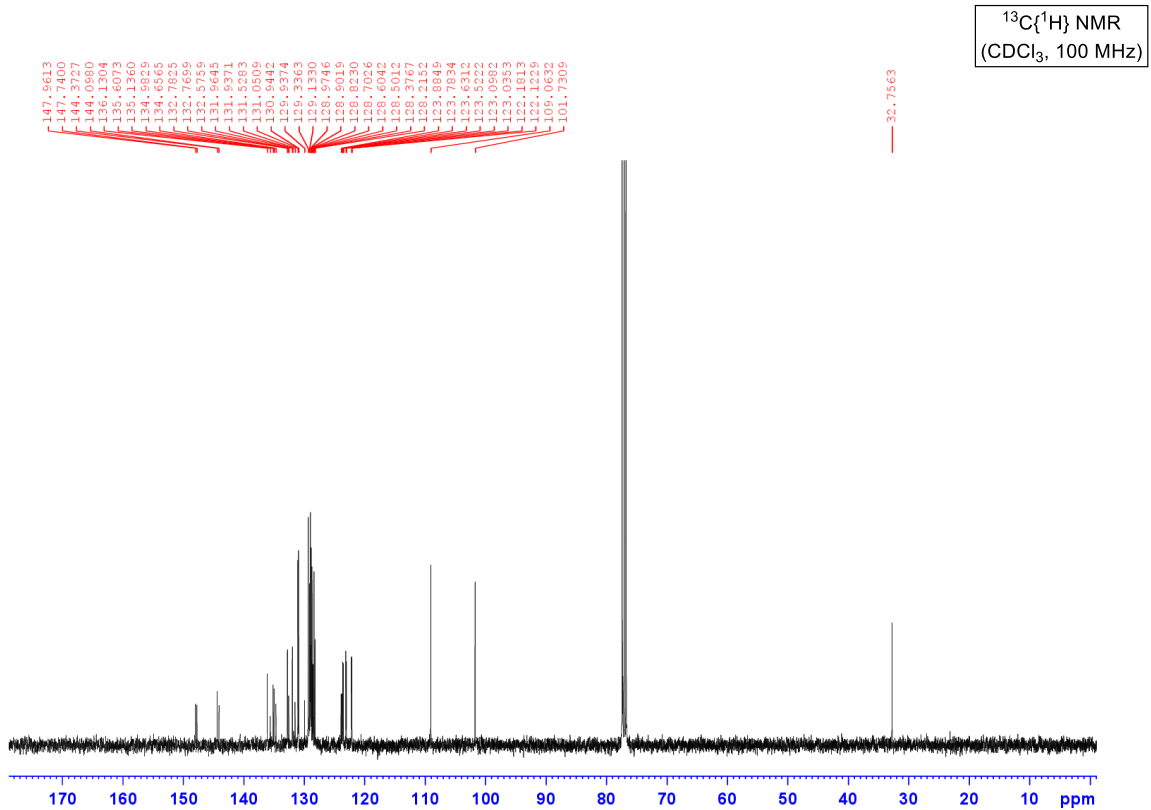

$^{31}\text{P}\{^1\text{H}\}$  NMR  
( $\text{CDCl}_3$ , 162 MHz)

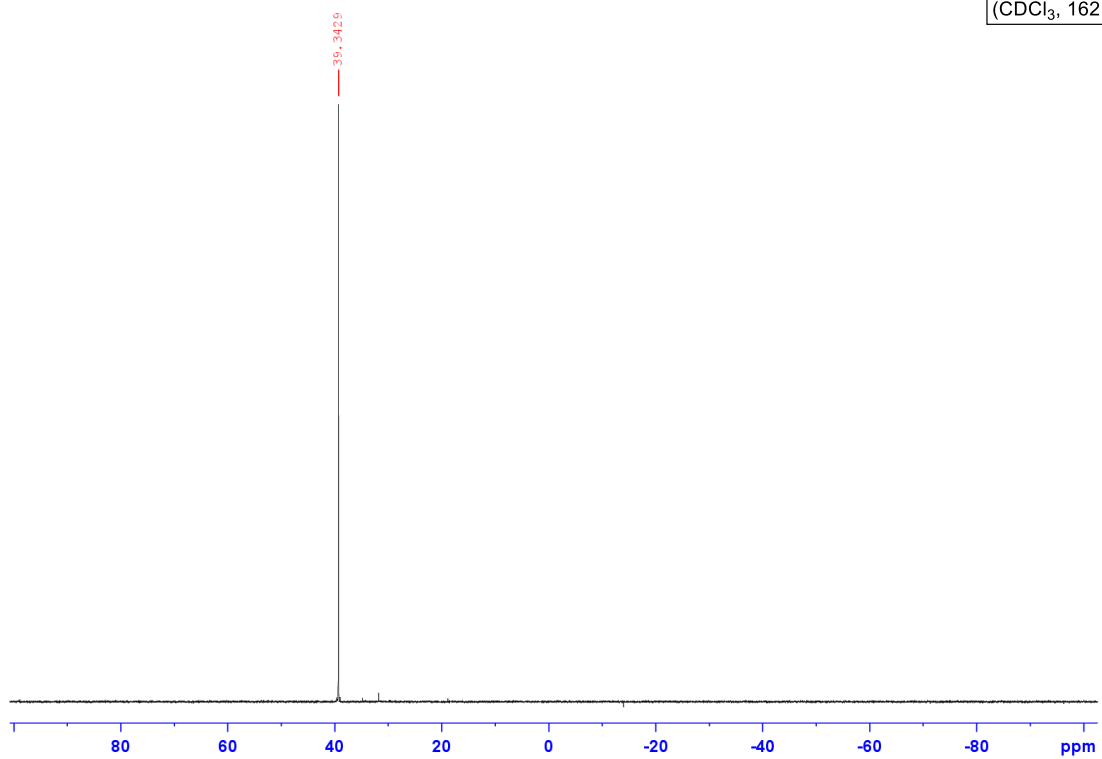

[<sup>1</sup>H, <sup>13</sup>C{<sup>1</sup>H}, and <sup>31</sup>P{<sup>1</sup>H} NMR Spectra of **4ao**]

<sup>1</sup>H NMR  
(CDCl<sub>3</sub>, 400 MHz)

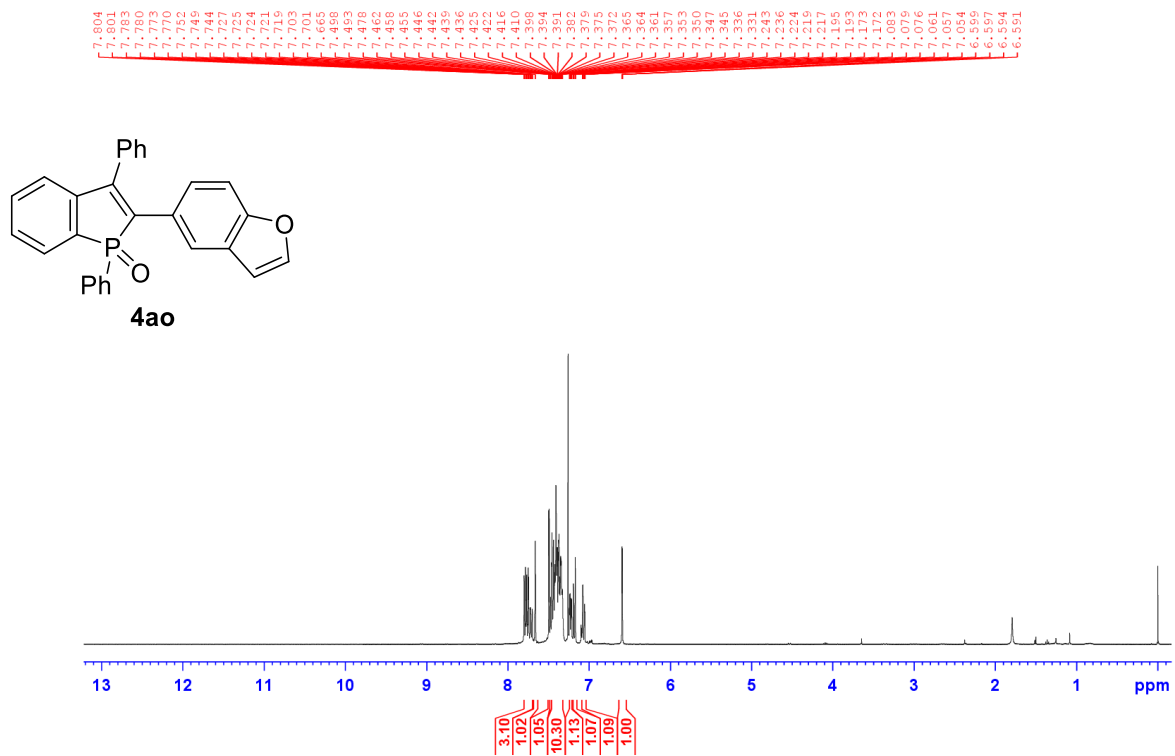

<sup>13</sup>C{<sup>1</sup>H} NMR  
(CDCl<sub>3</sub>, 100 MHz)

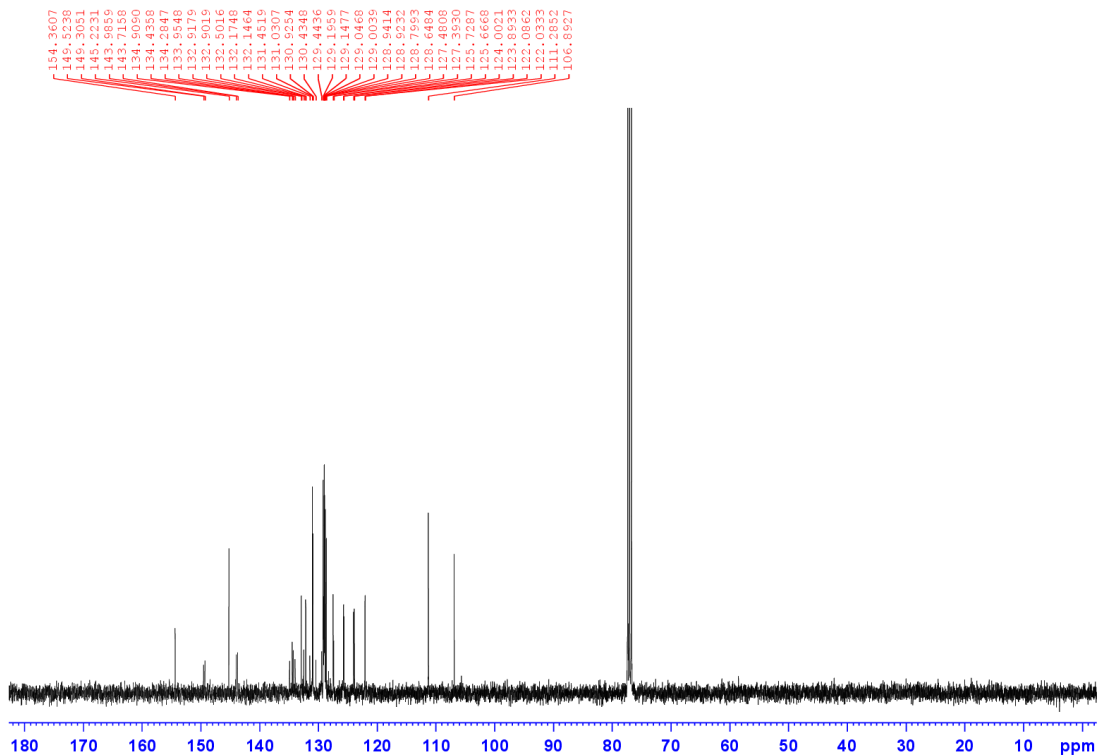



$^{31}\text{P}\{^1\text{H}\}$  NMR  
( $\text{CDCl}_3$ , 162 MHz)

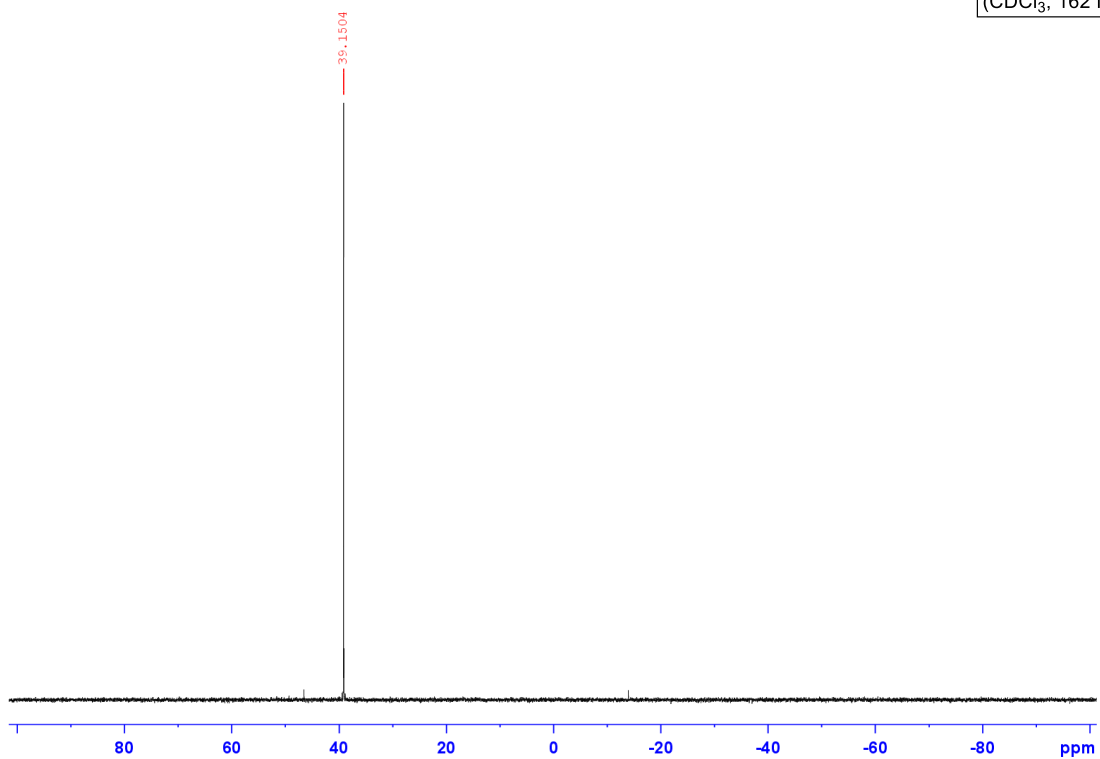

[<sup>1</sup>H, <sup>13</sup>C{<sup>1</sup>H}, and <sup>31</sup>P{<sup>1</sup>H} NMR Spectra of **4ap**]

<sup>1</sup>H NMR  
(CDCl<sub>3</sub>, 400 MHz)

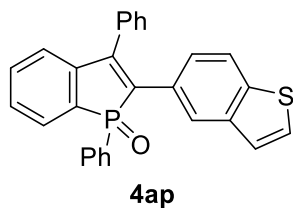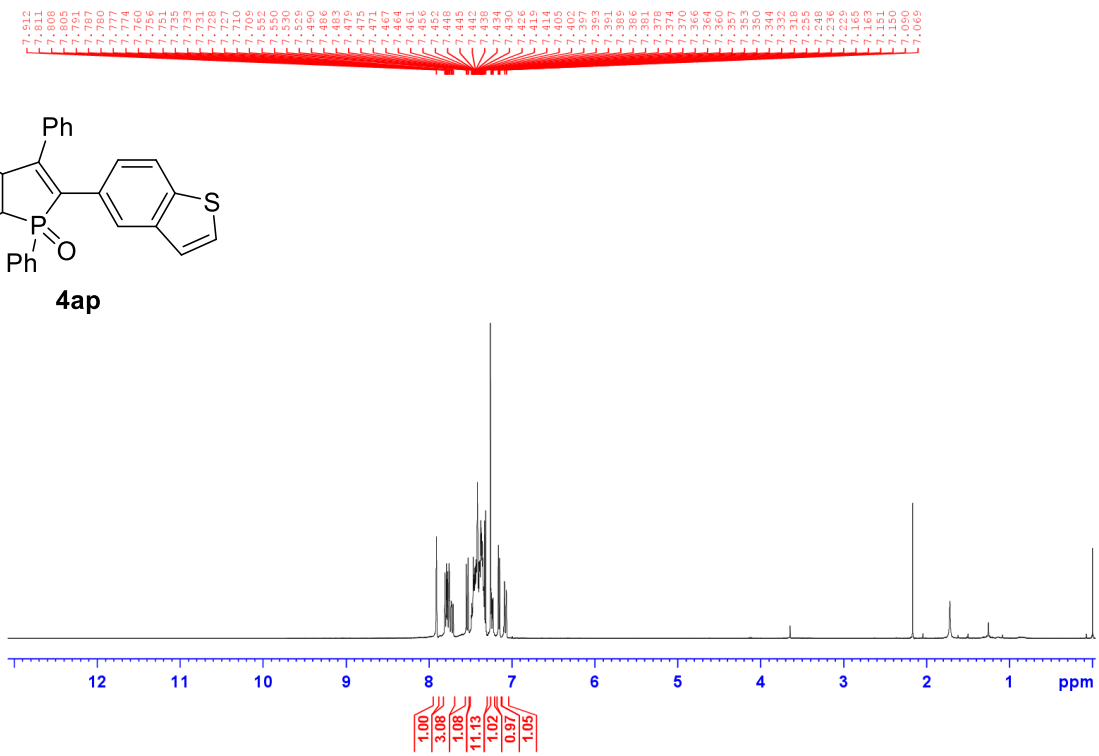

$^{31}\text{P}\{^1\text{H}\}$  NMR  
( $\text{CDCl}_3$ , 162 MHz)

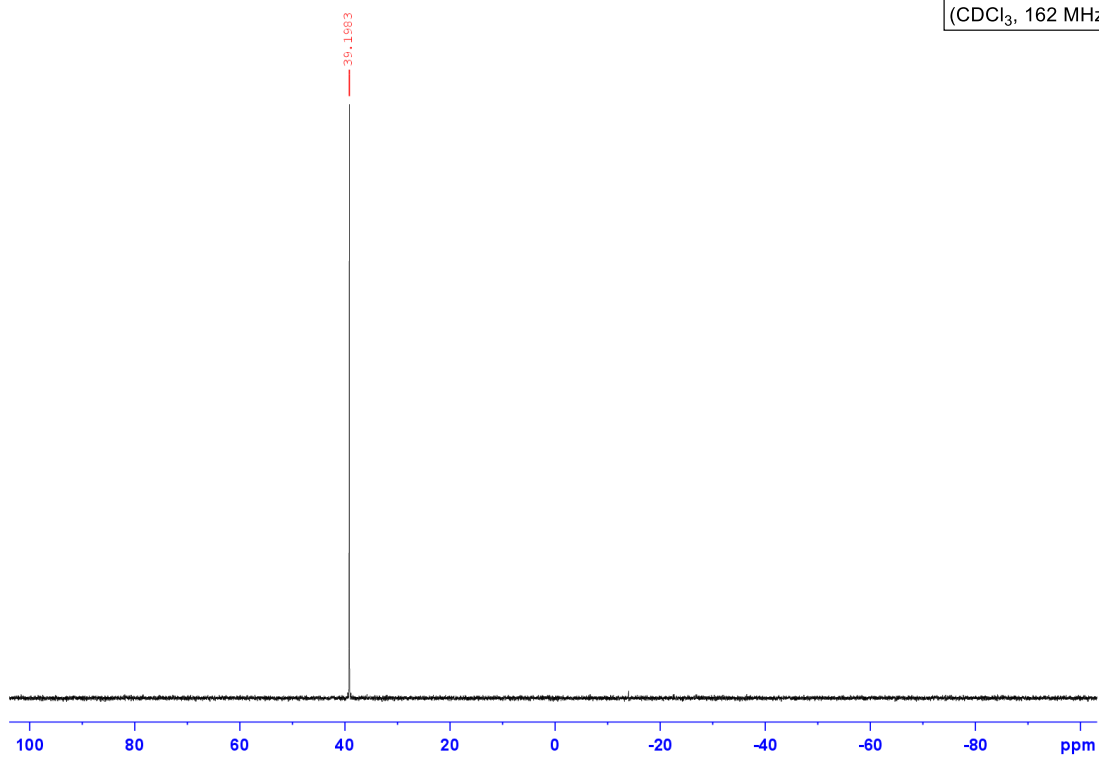

[<sup>1</sup>H, <sup>13</sup>C{<sup>1</sup>H}, and <sup>31</sup>P{<sup>1</sup>H} NMR Spectra of **4aq**]

<sup>1</sup>H NMR  
(CDCl<sub>3</sub>, 400 MHz)

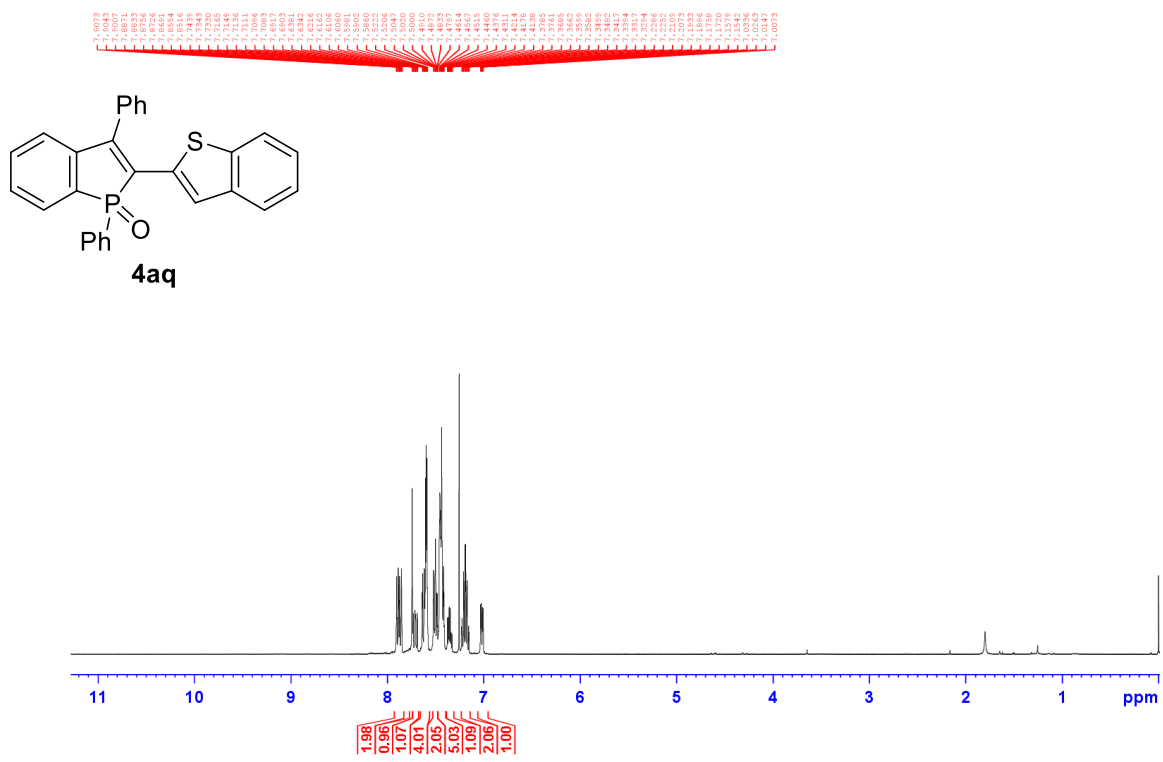

<sup>13</sup>C{<sup>1</sup>H} NMR  
(CDCl<sub>3</sub>, 100 MHz)

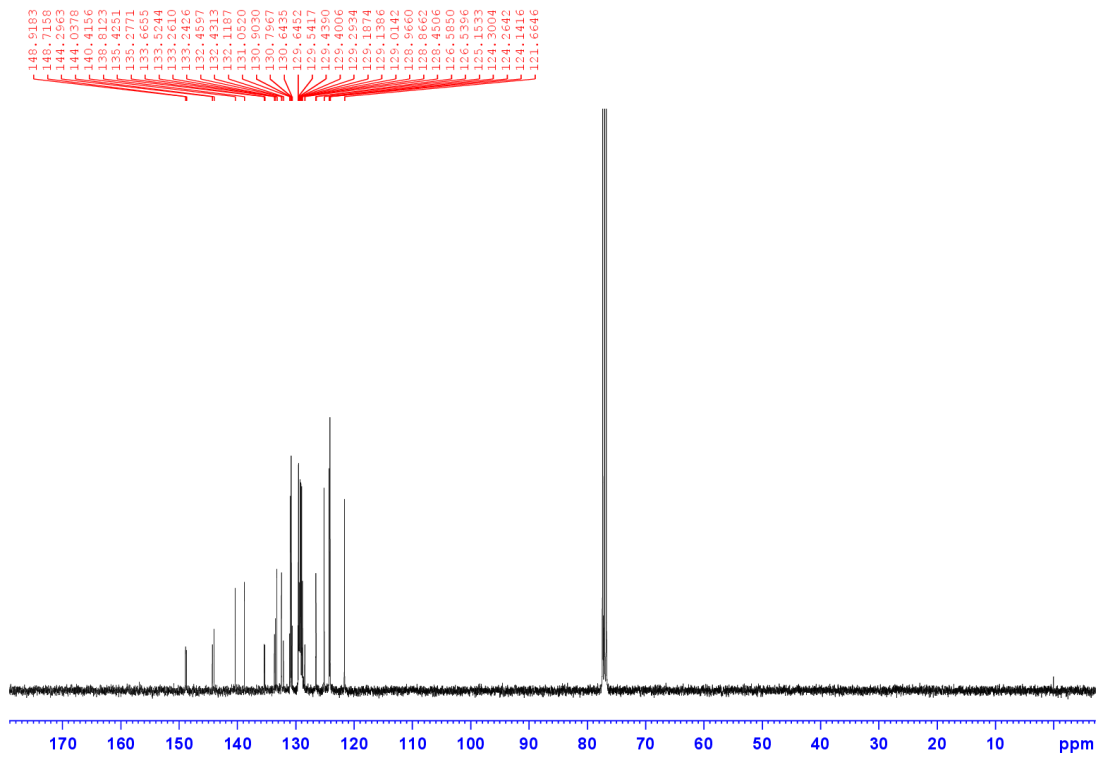

$^{31}\text{P}\{^1\text{H}\}$  NMR  
( $\text{CDCl}_3$ , 162 MHz)

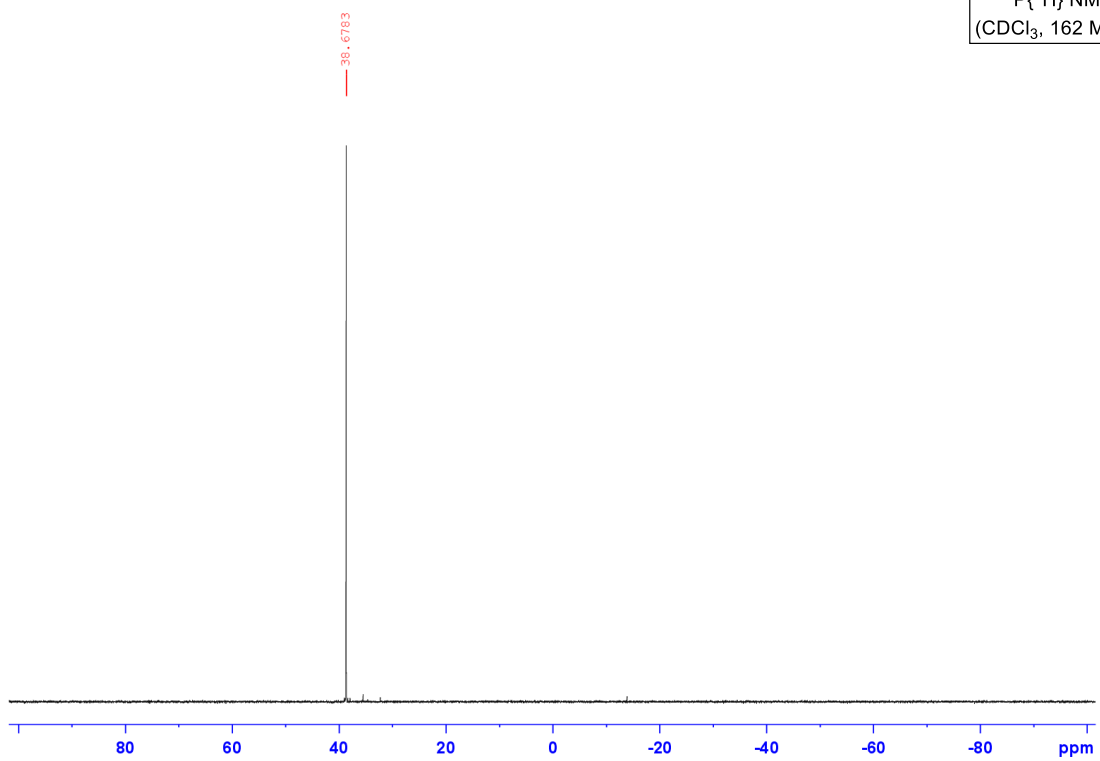

[<sup>1</sup>H, <sup>13</sup>C{<sup>1</sup>H}, and <sup>31</sup>P{<sup>1</sup>H} NMR Spectra of **4ar**]

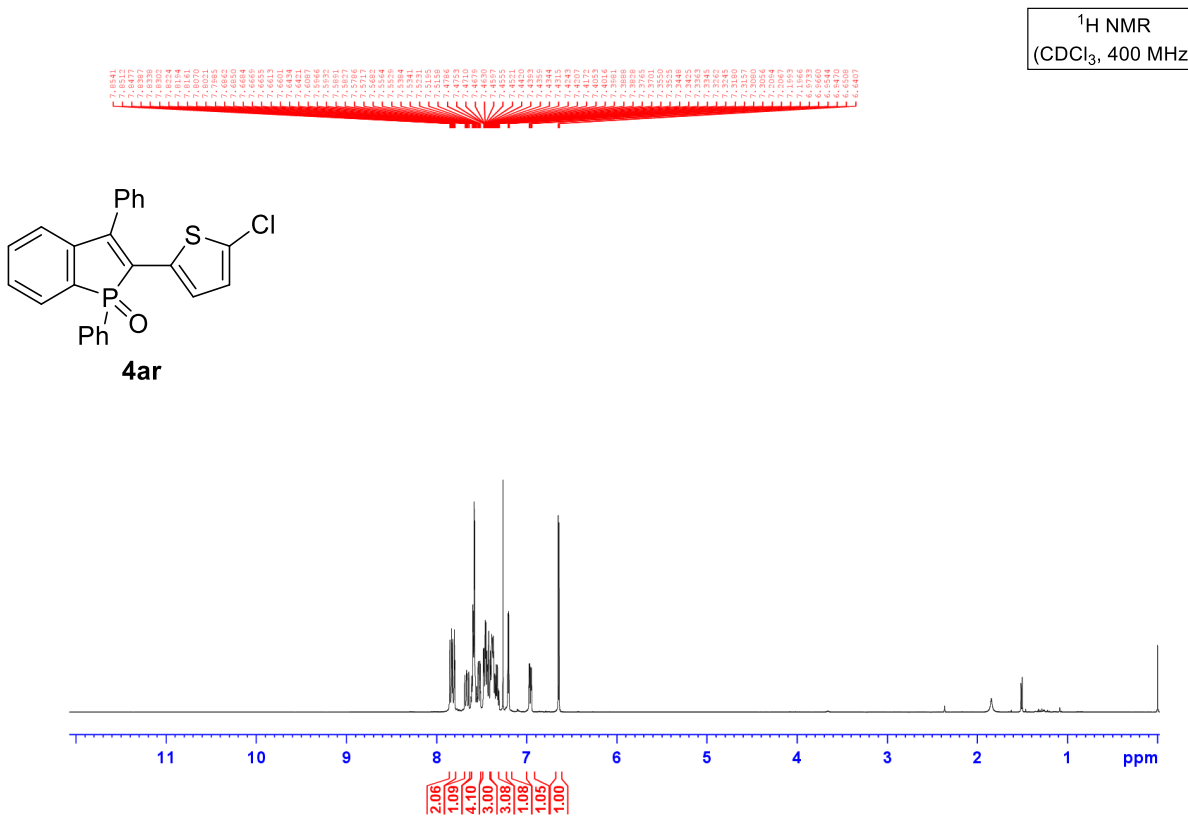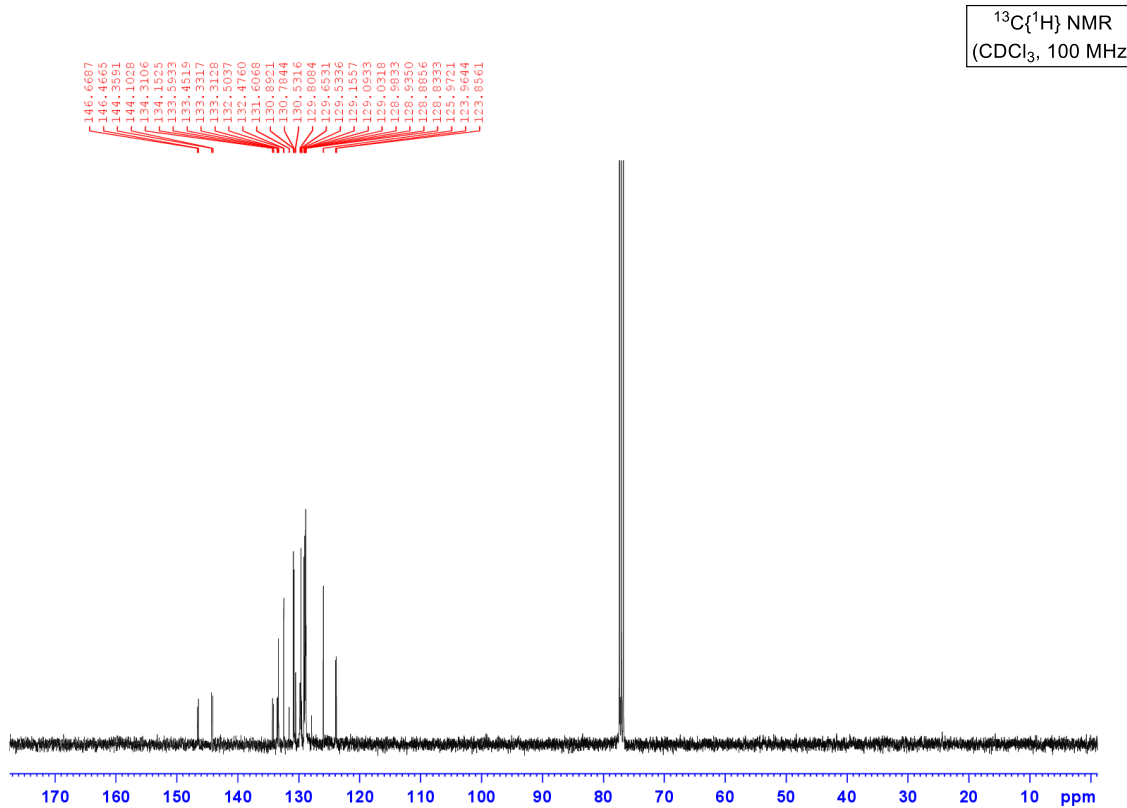

$^{31}\text{P}\{^1\text{H}\}$  NMR  
( $\text{CDCl}_3$ , 162 MHz)

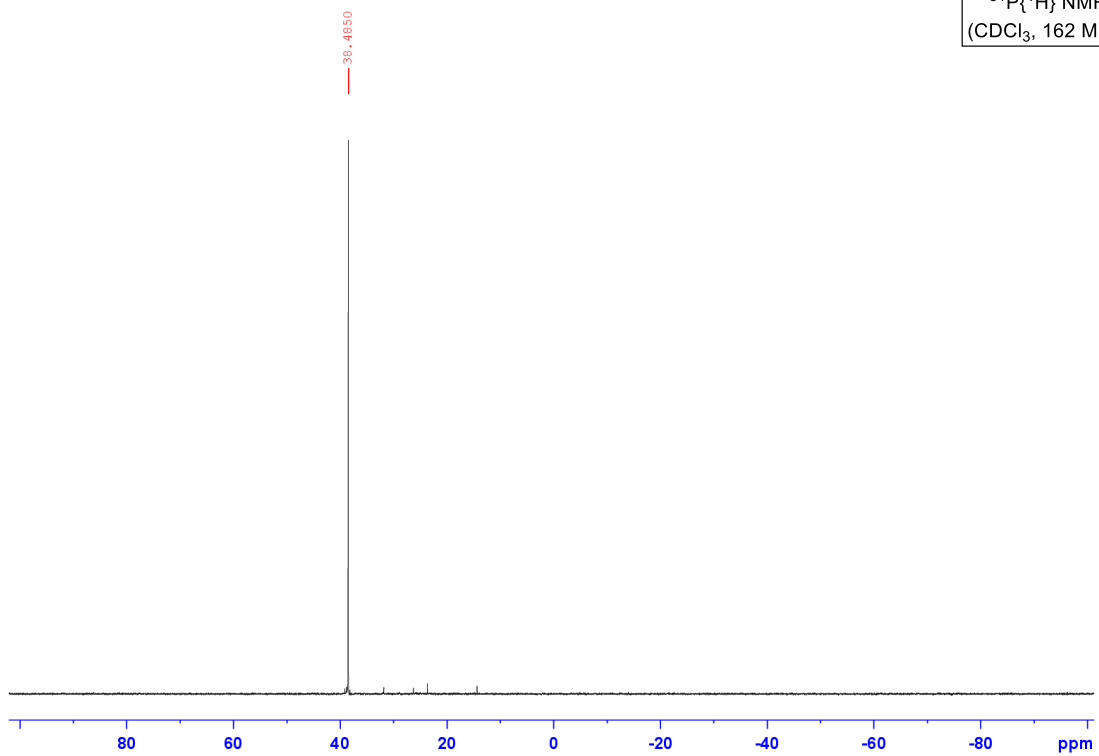

[<sup>1</sup>H, <sup>13</sup>C{<sup>1</sup>H}, and <sup>31</sup>P{<sup>1</sup>H} NMR Spectra of **4as**]

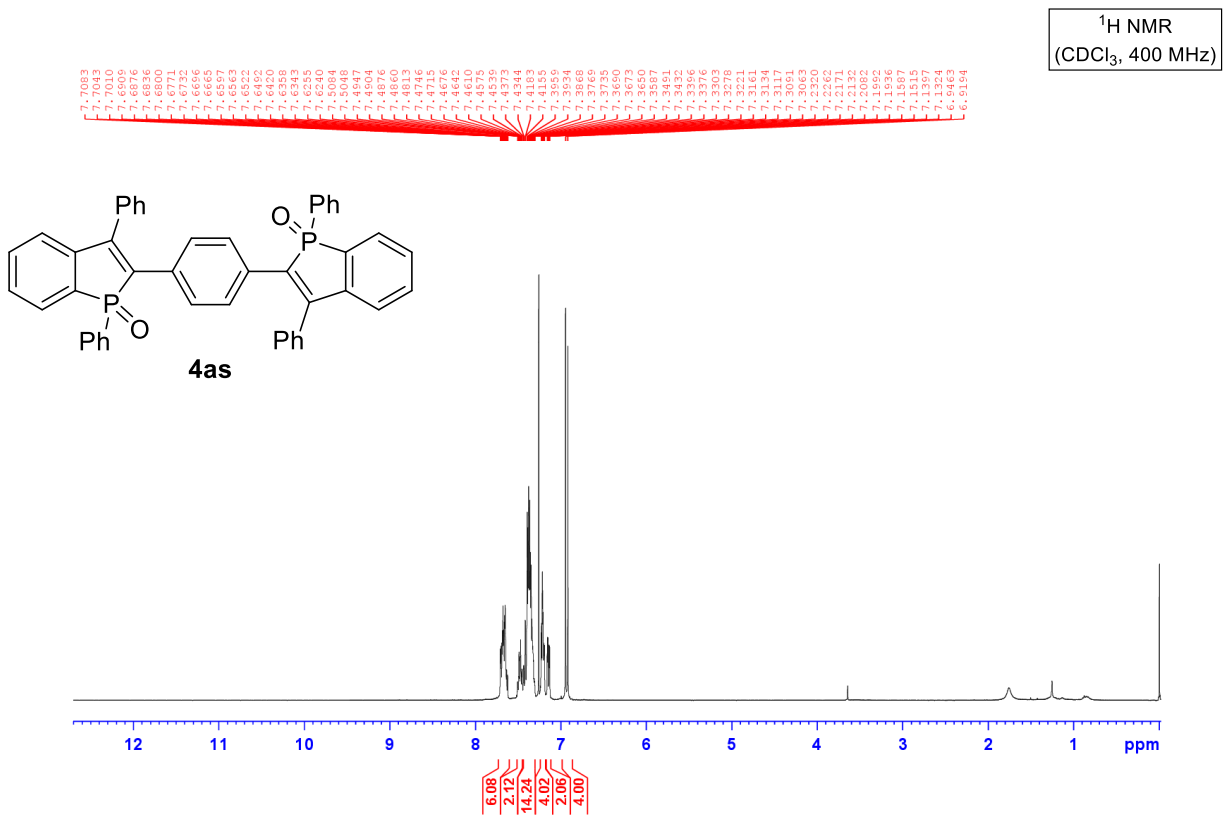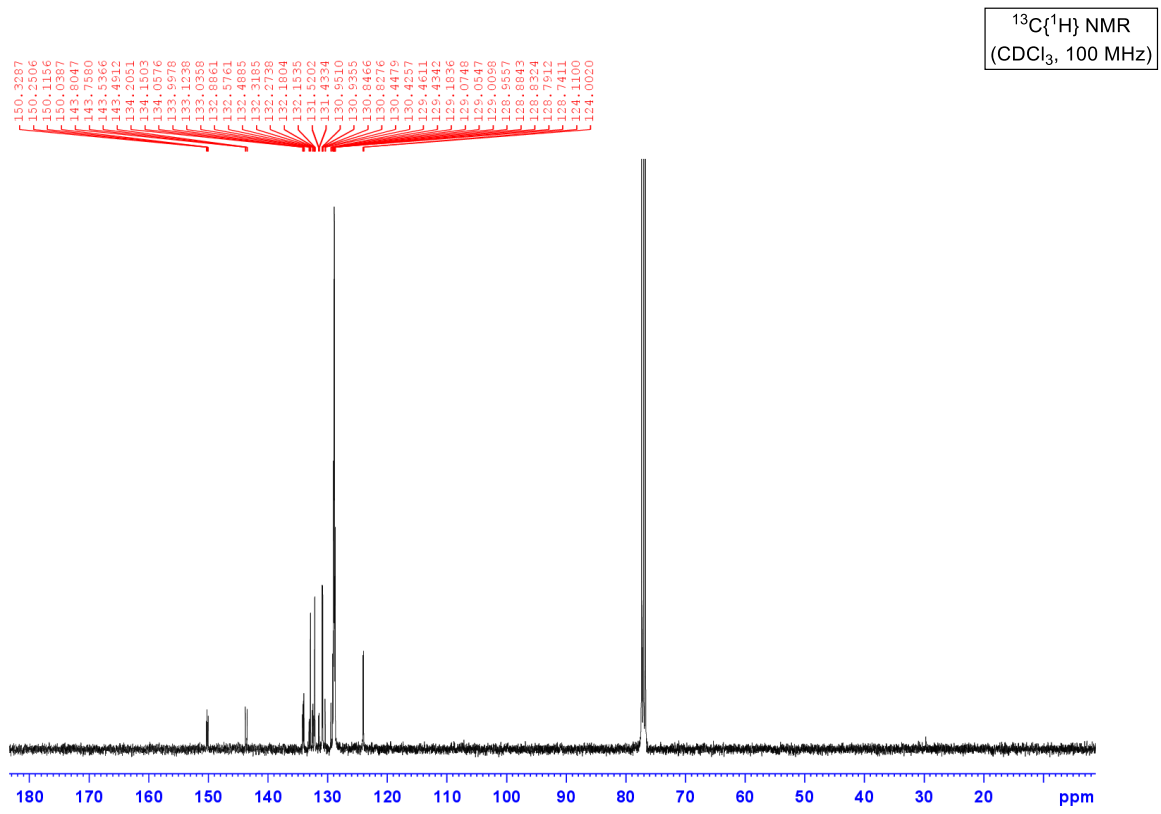



$^{31}\text{P}\{^1\text{H}\}$  NMR  
( $\text{CDCl}_3$ , 162 MHz)

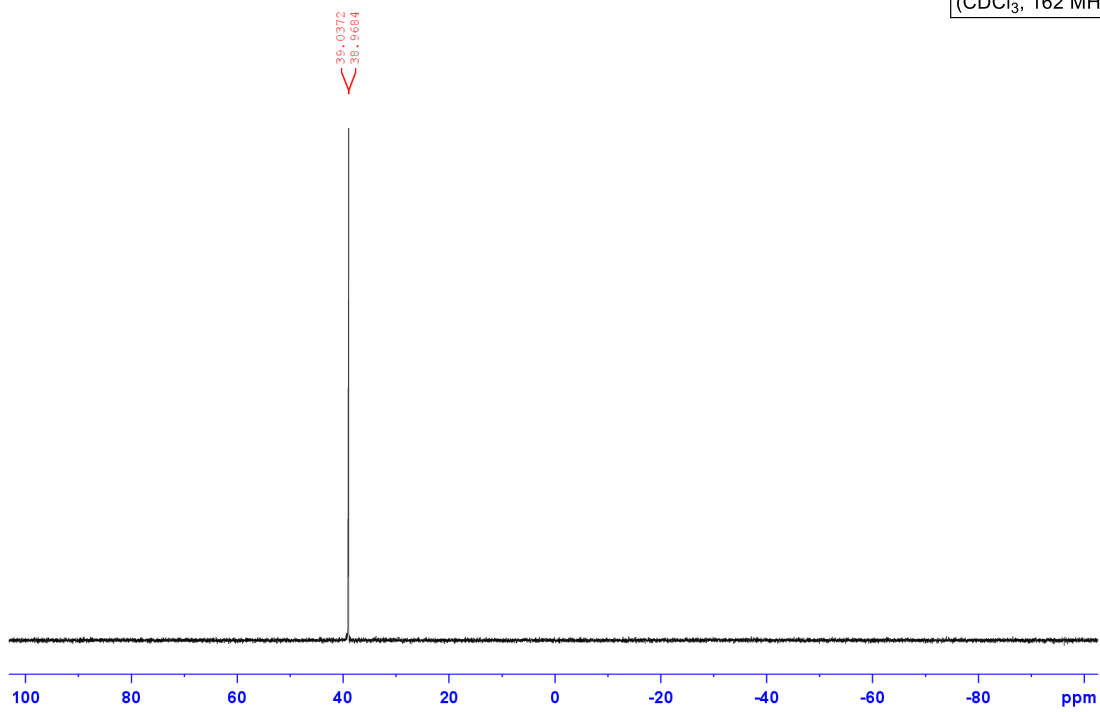

[<sup>1</sup>H, <sup>13</sup>C{<sup>1</sup>H}, and <sup>31</sup>P{<sup>1</sup>H} NMR Spectra of **4at**]

<sup>1</sup>H NMR  
(CDCl<sub>3</sub>, 400 MHz)

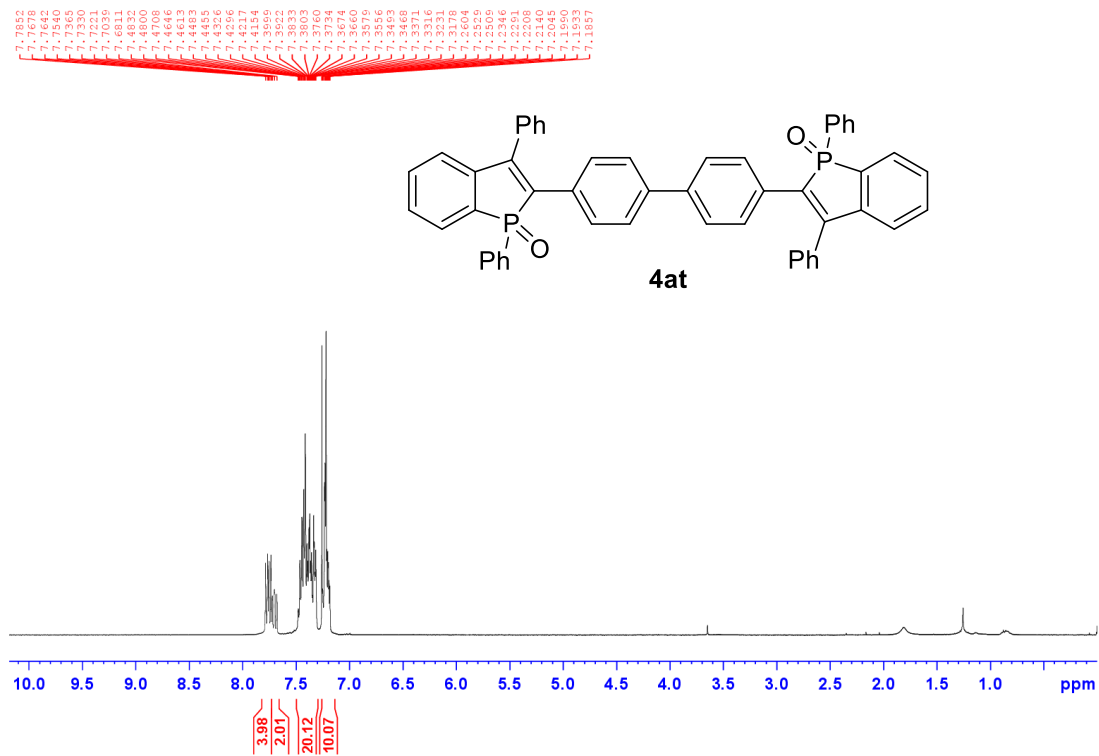

<sup>13</sup>C{<sup>1</sup>H} NMR  
(CDCl<sub>3</sub>, 100 MHz)

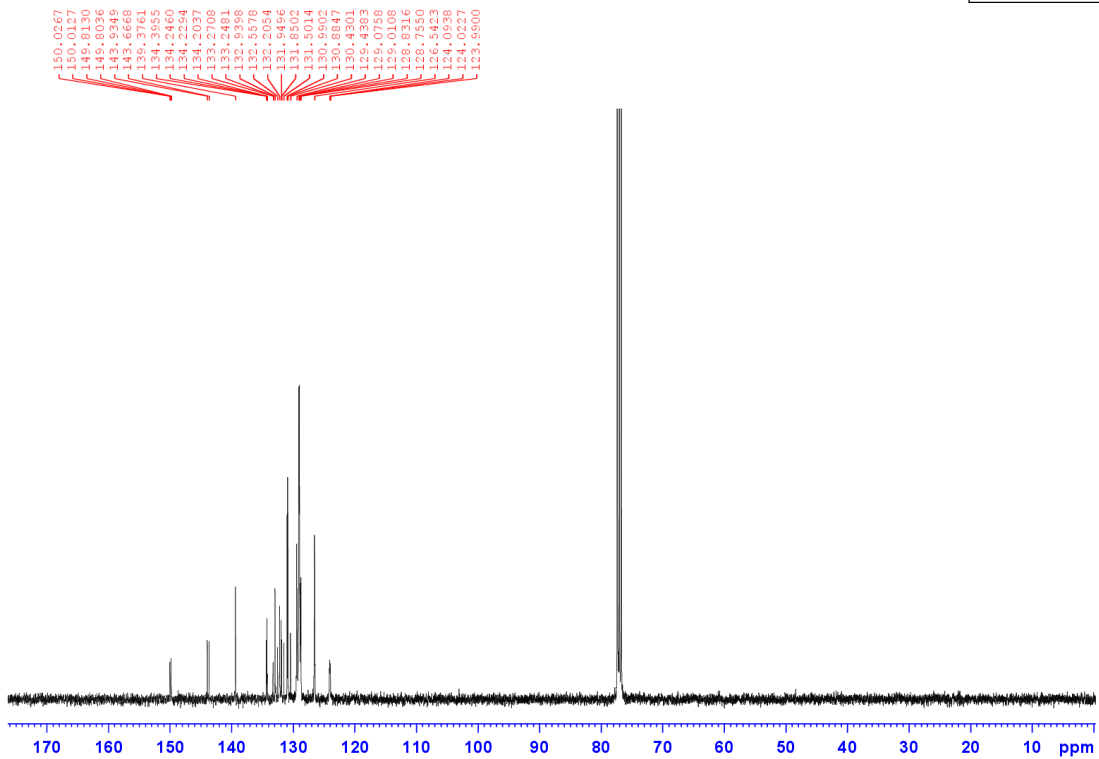

$^{31}\text{P}\{^1\text{H}\}$  NMR  
( $\text{CDCl}_3$ , 162 MHz)

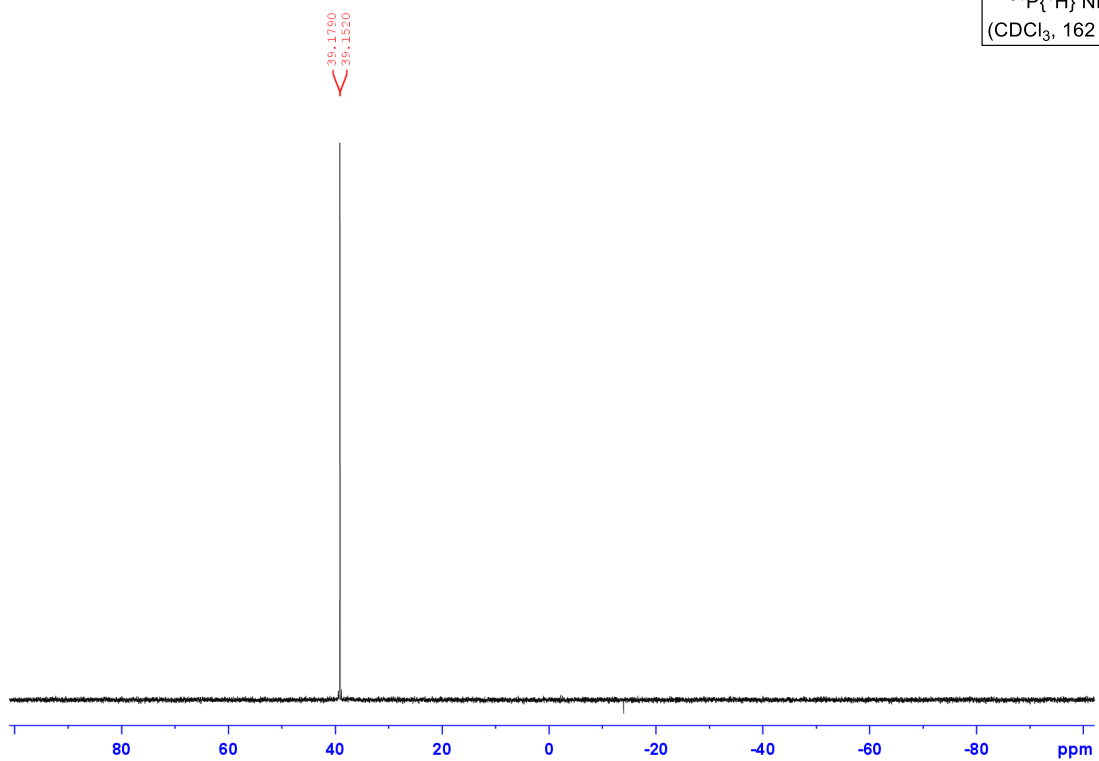

[<sup>1</sup>H, <sup>13</sup>C{<sup>1</sup>H}, and <sup>31</sup>P{<sup>1</sup>H} NMR Spectra of **4au**]

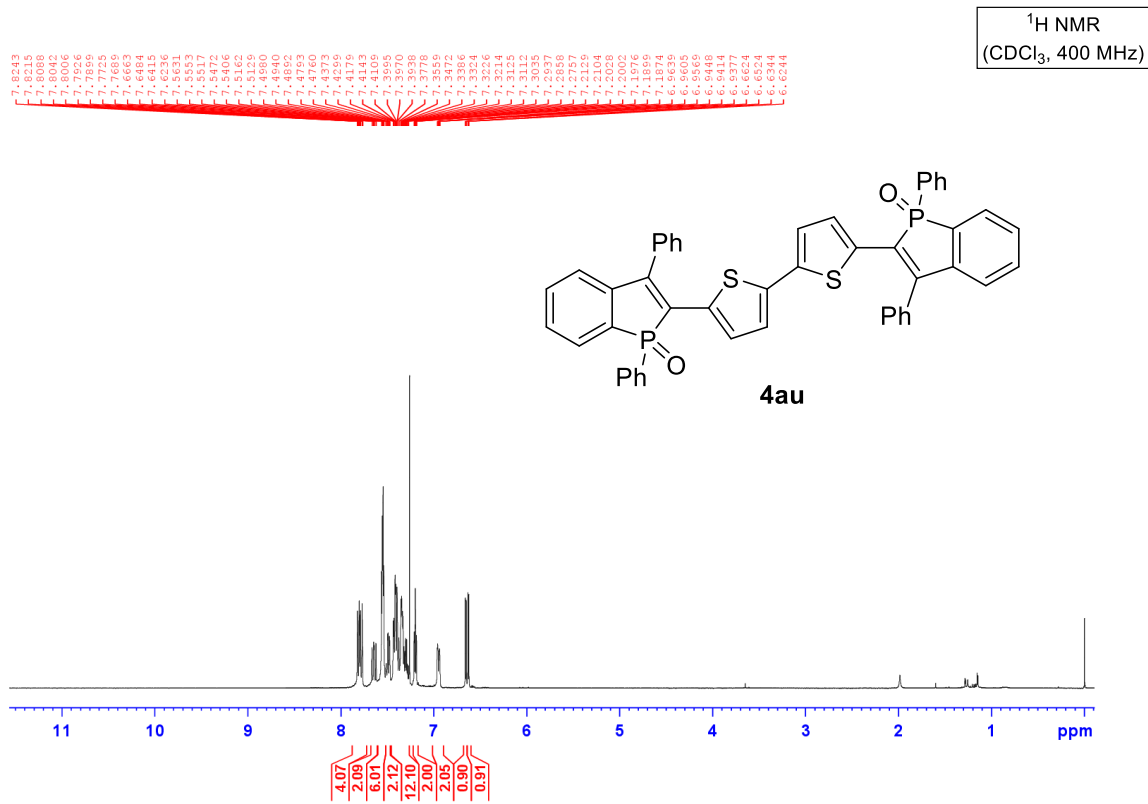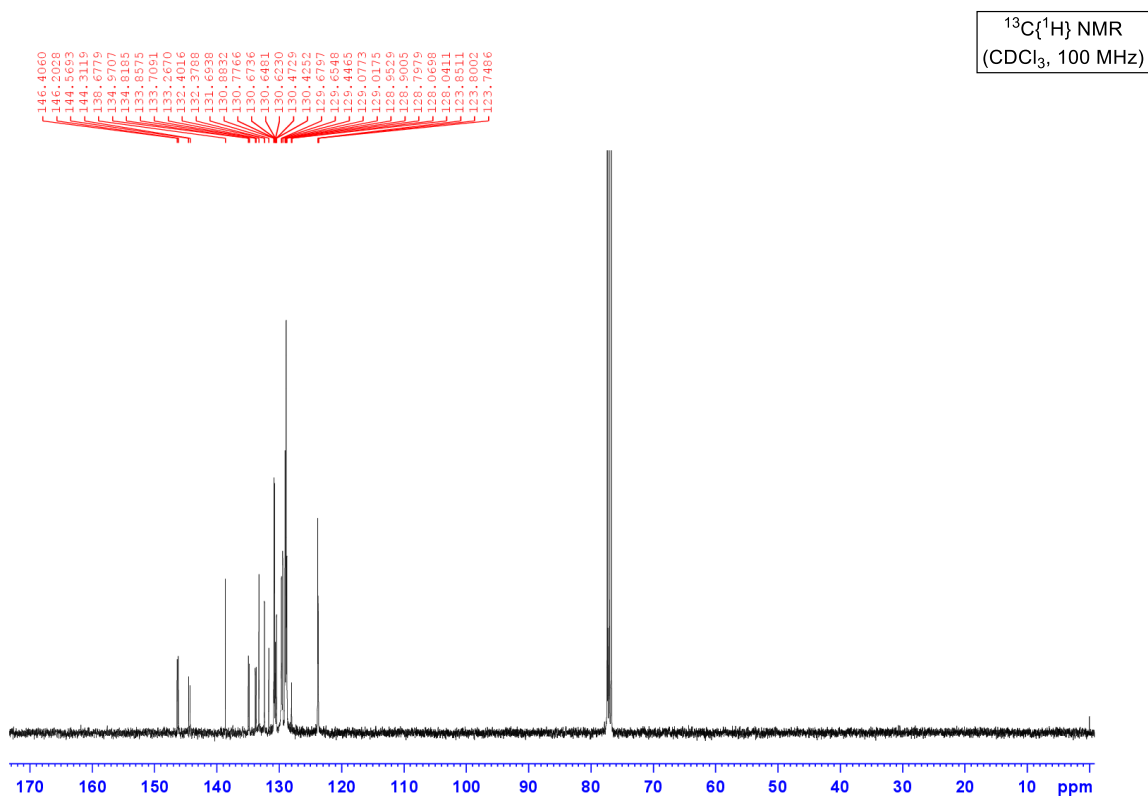

$^{31}\text{P}\{^1\text{H}\}$  NMR  
( $\text{CDCl}_3$ , 162 MHz)

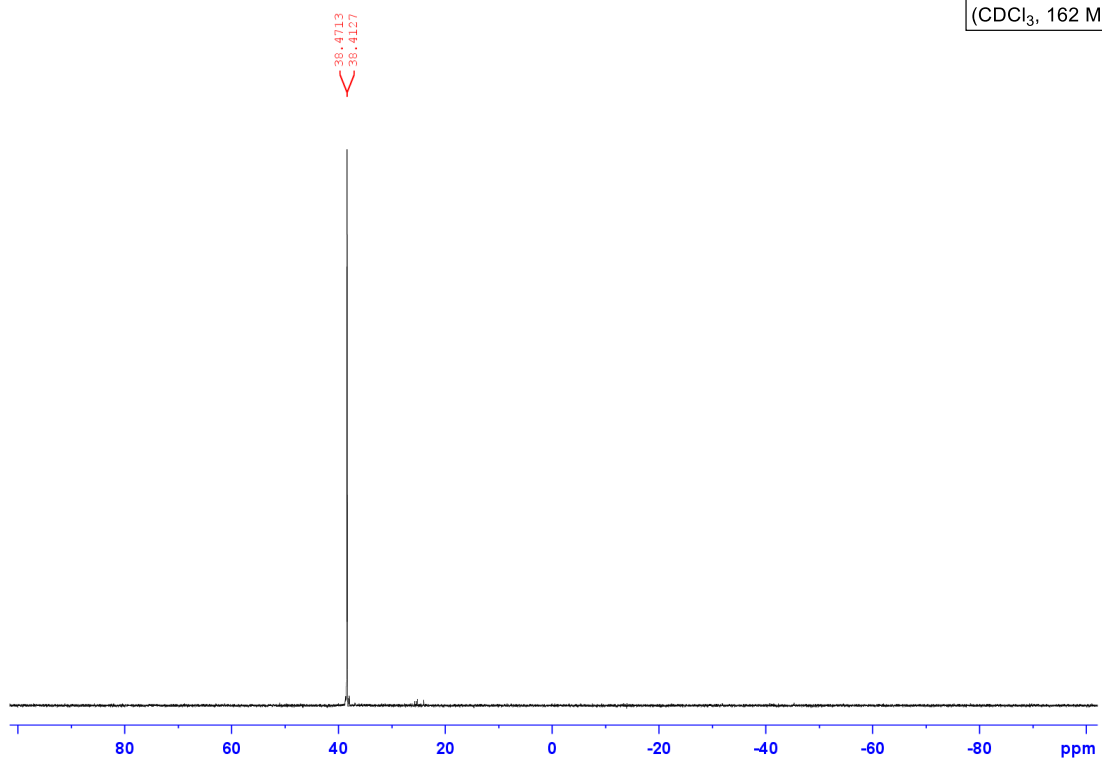

[<sup>1</sup>H, <sup>13</sup>C{<sup>1</sup>H}, and <sup>31</sup>P{<sup>1</sup>H} NMR Spectra of **4av**]

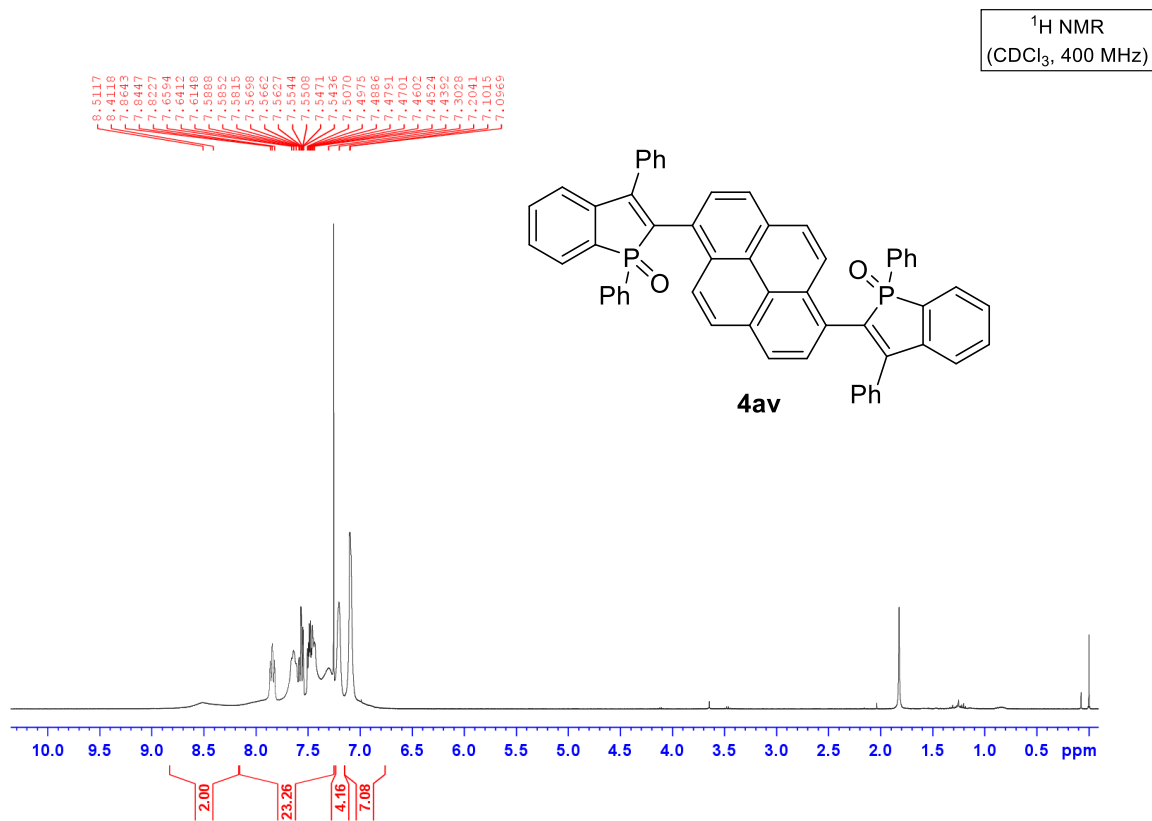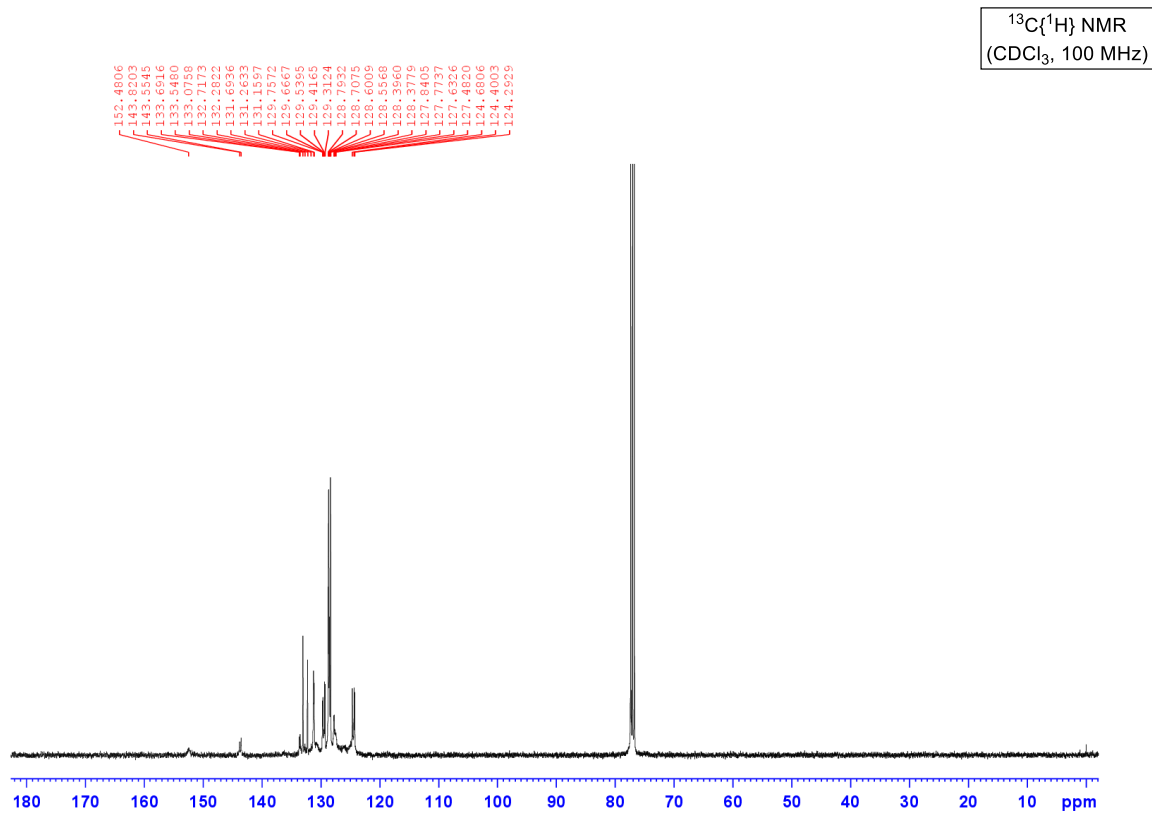

$^{31}\text{P}\{^1\text{H}\}$  NMR  
( $\text{CDCl}_3$ , 162 MHz)

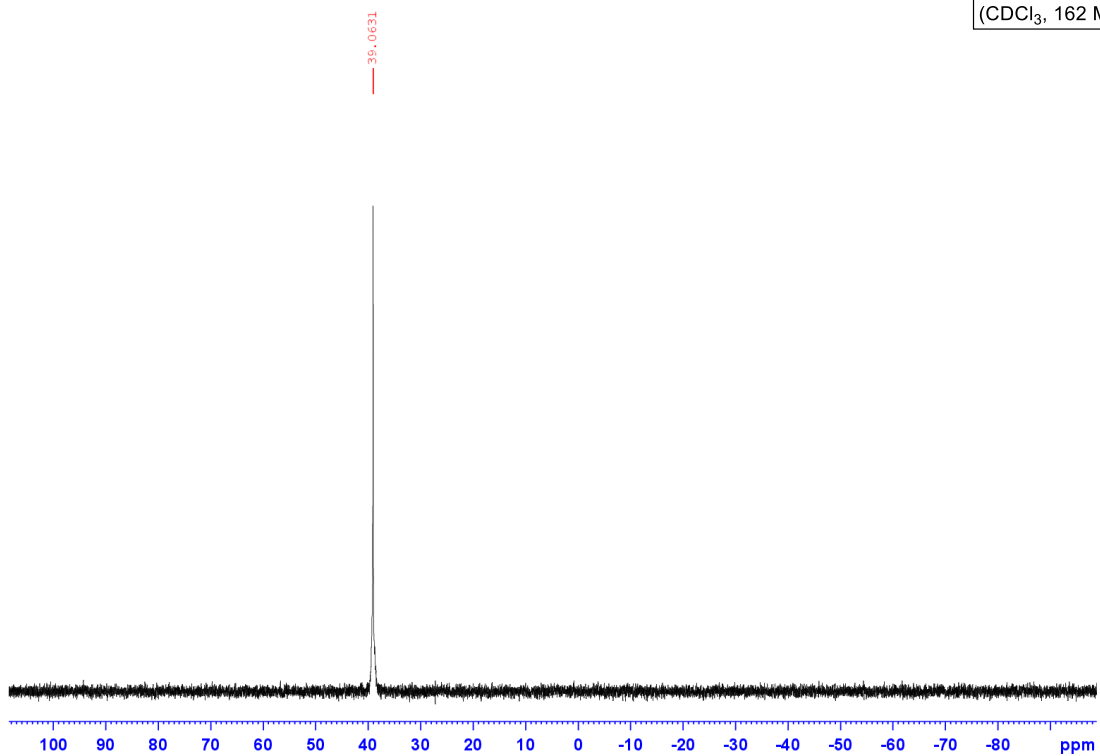

[<sup>1</sup>H, <sup>13</sup>C{<sup>1</sup>H}, and <sup>31</sup>P{<sup>1</sup>H} NMR Spectra of **4ba**]

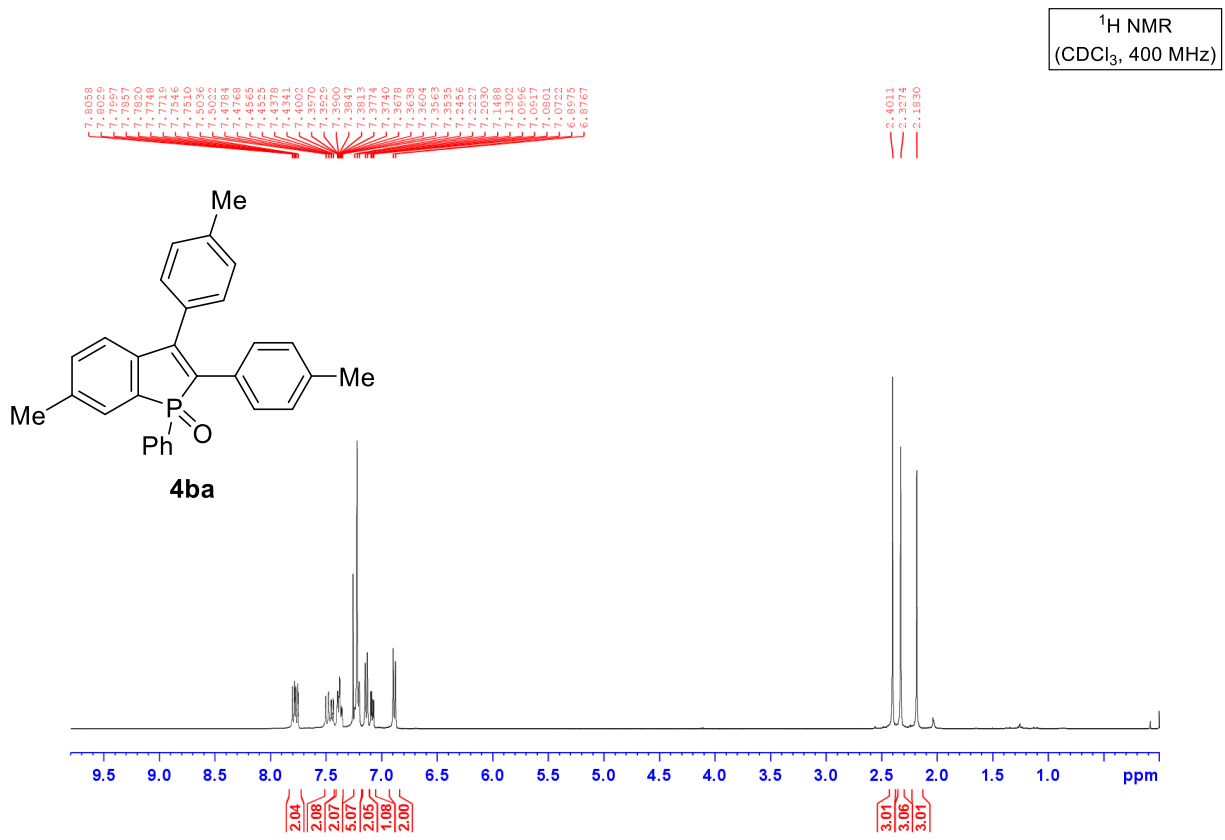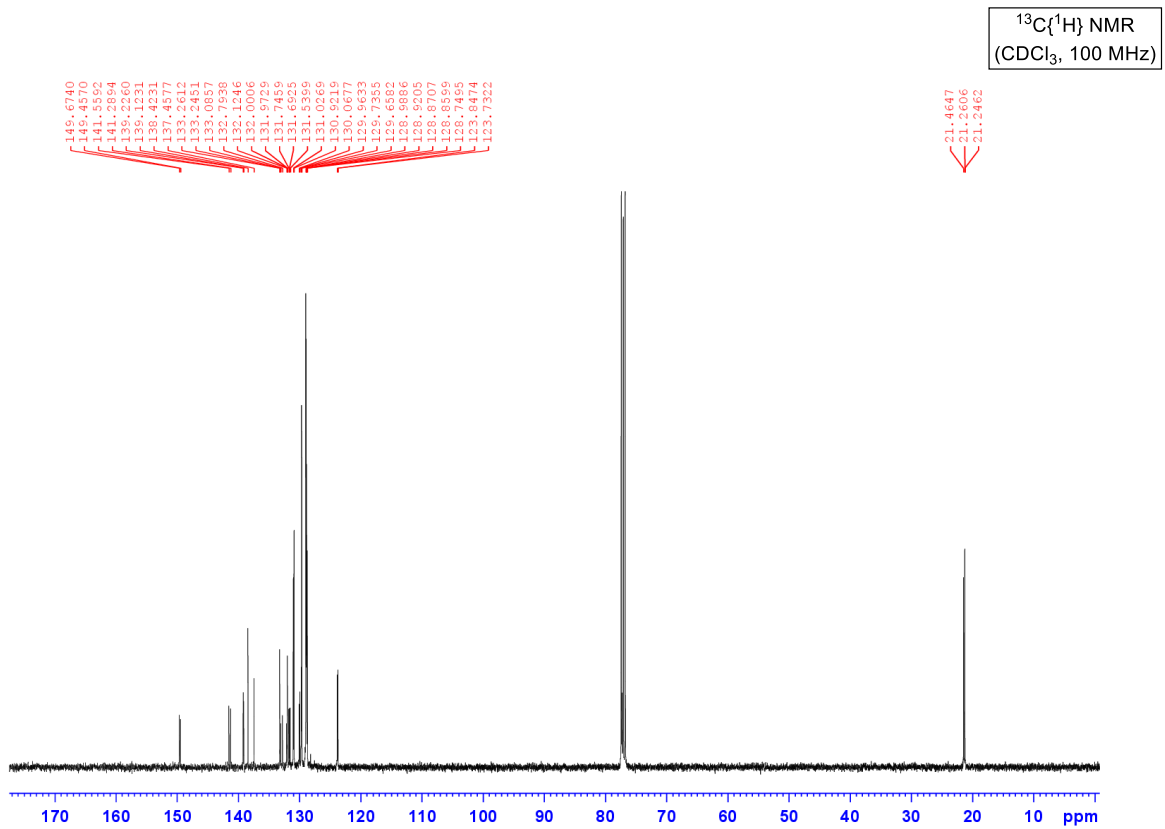



$^{31}\text{P}\{^1\text{H}\}$  NMR  
( $\text{CDCl}_3$ , 162 MHz)

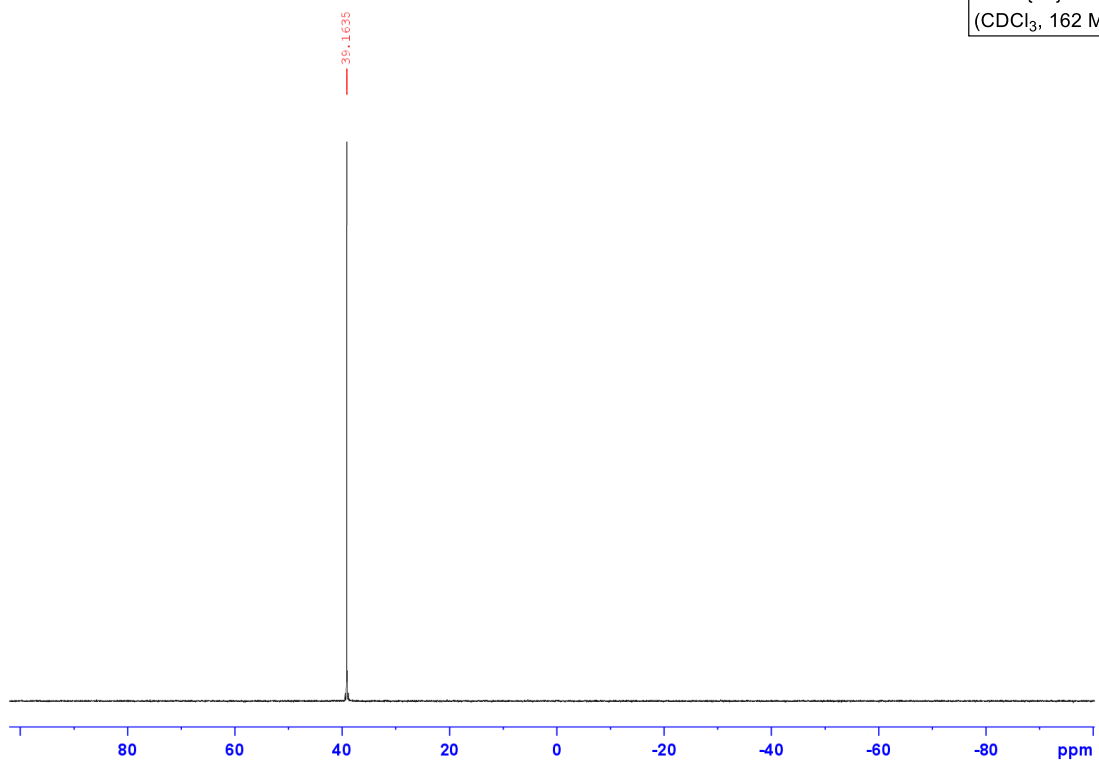

[<sup>1</sup>H, <sup>13</sup>C{<sup>1</sup>H}, and <sup>31</sup>P{<sup>1</sup>H}] NMR Spectra of **4da**

<sup>1</sup>H NMR  
(CDCl<sub>3</sub>, 400 MHz)

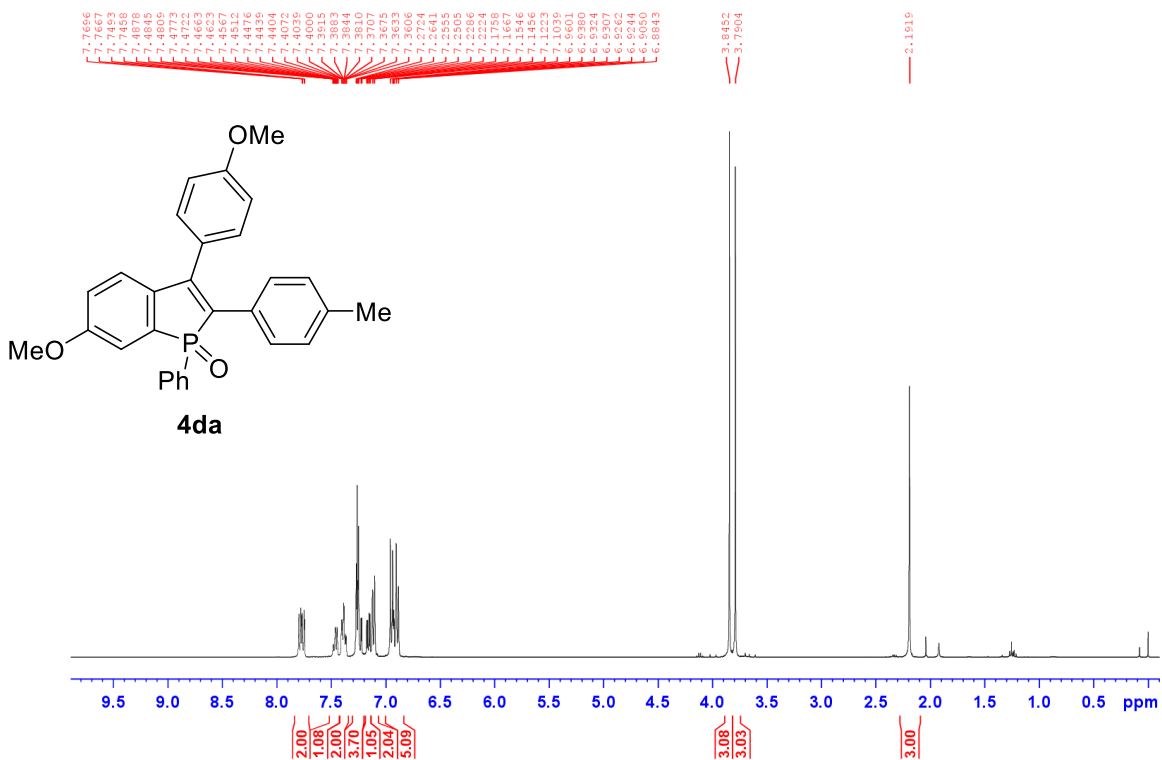

<sup>13</sup>C{<sup>1</sup>H} NMR  
(CDCl<sub>3</sub>, 100 MHz)

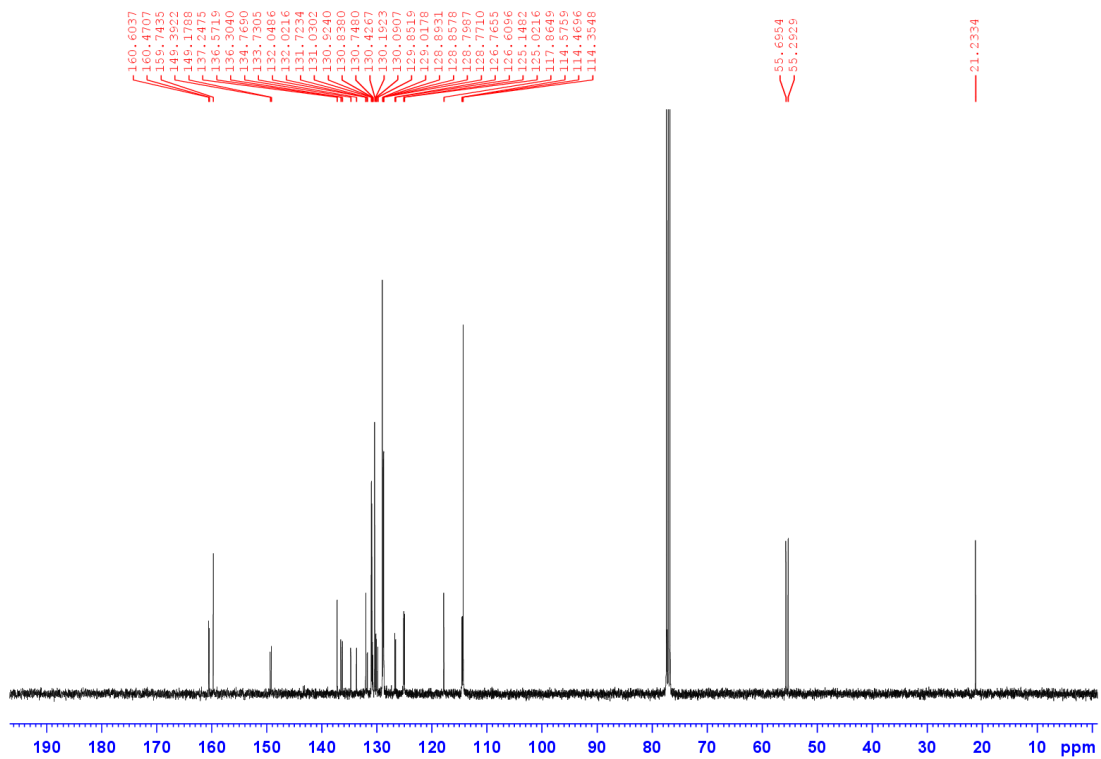

$^{31}\text{P}\{^1\text{H}\}$  NMR  
( $\text{CDCl}_3$ , 162 MHz)

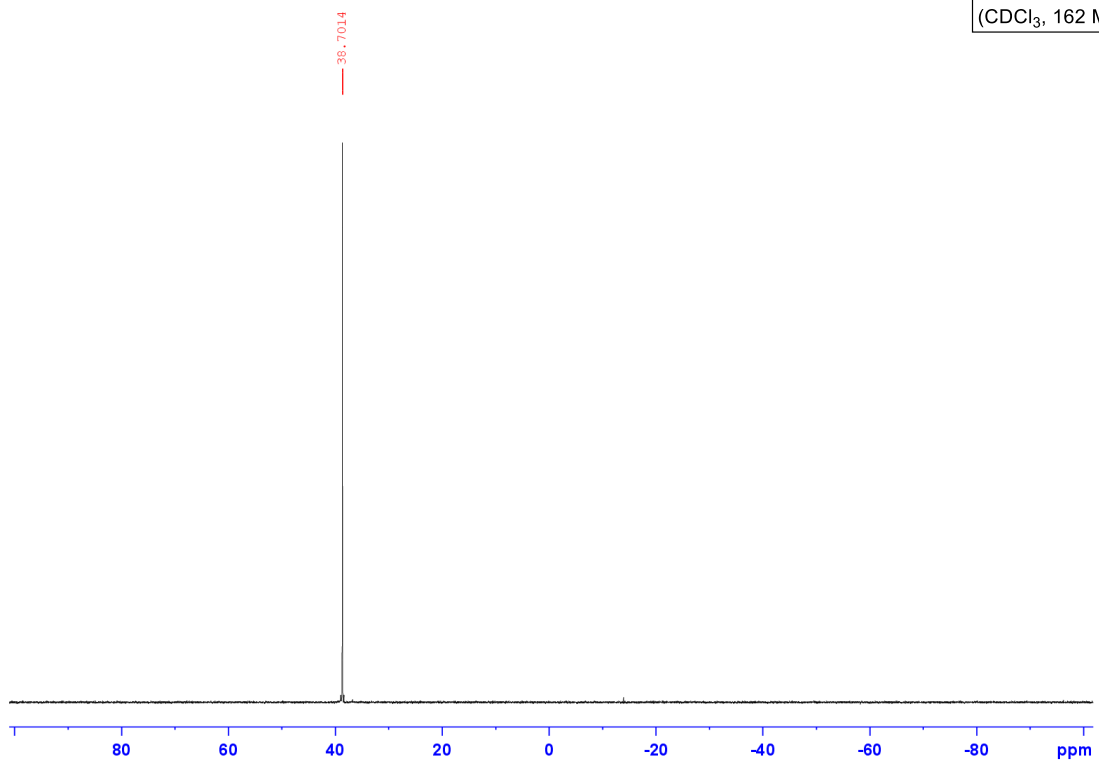

[<sup>1</sup>H, <sup>13</sup>C{<sup>1</sup>H}, <sup>19</sup>F{<sup>1</sup>H}, and <sup>31</sup>P{<sup>1</sup>H}] NMR Spectra of **4ea**]

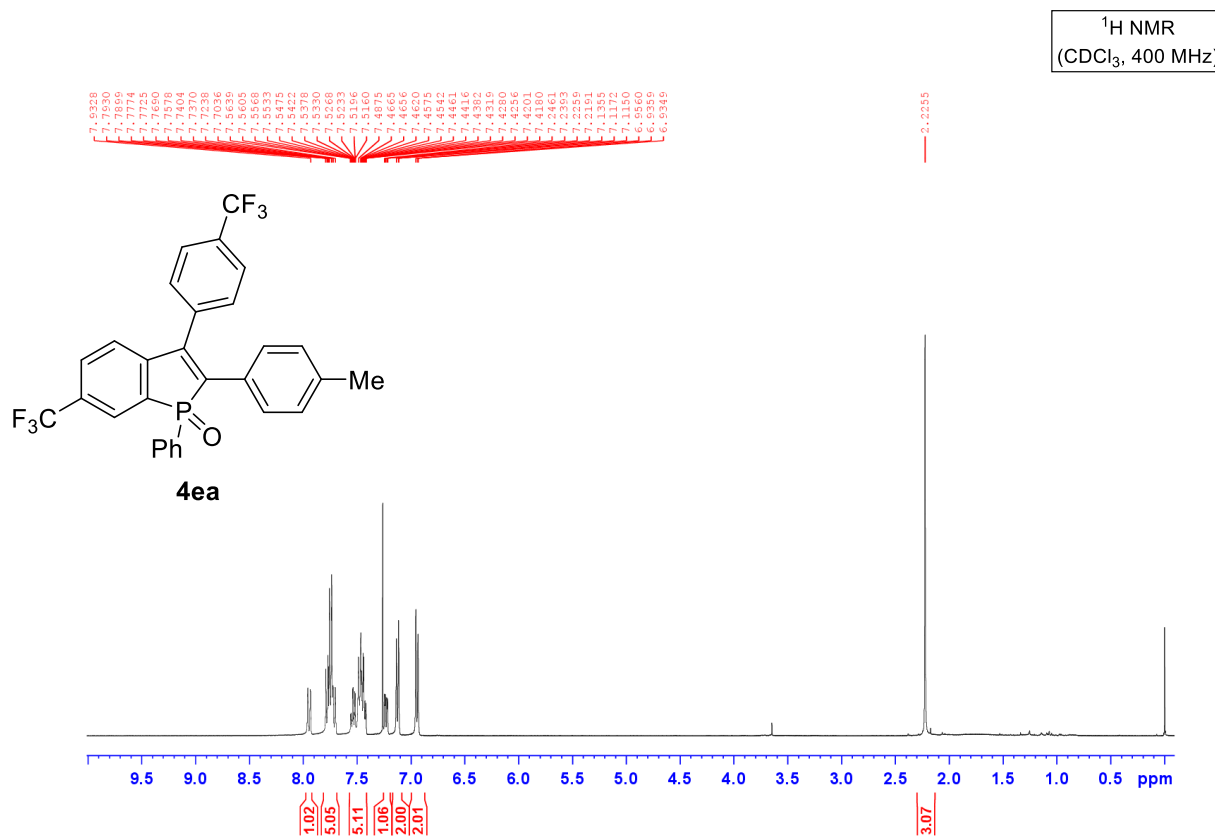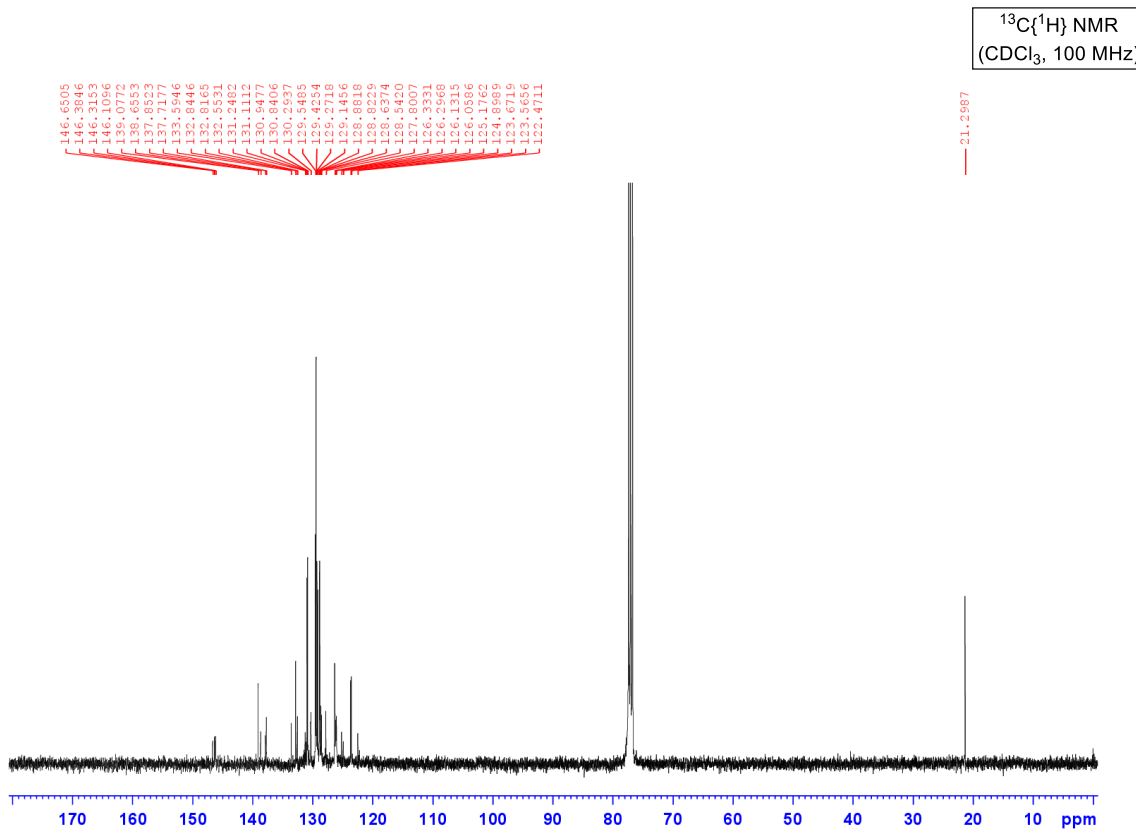

$^{19}\text{F}\{^1\text{H}\}$  NMR  
( $\text{CDCl}_3$ , 376 MHz)

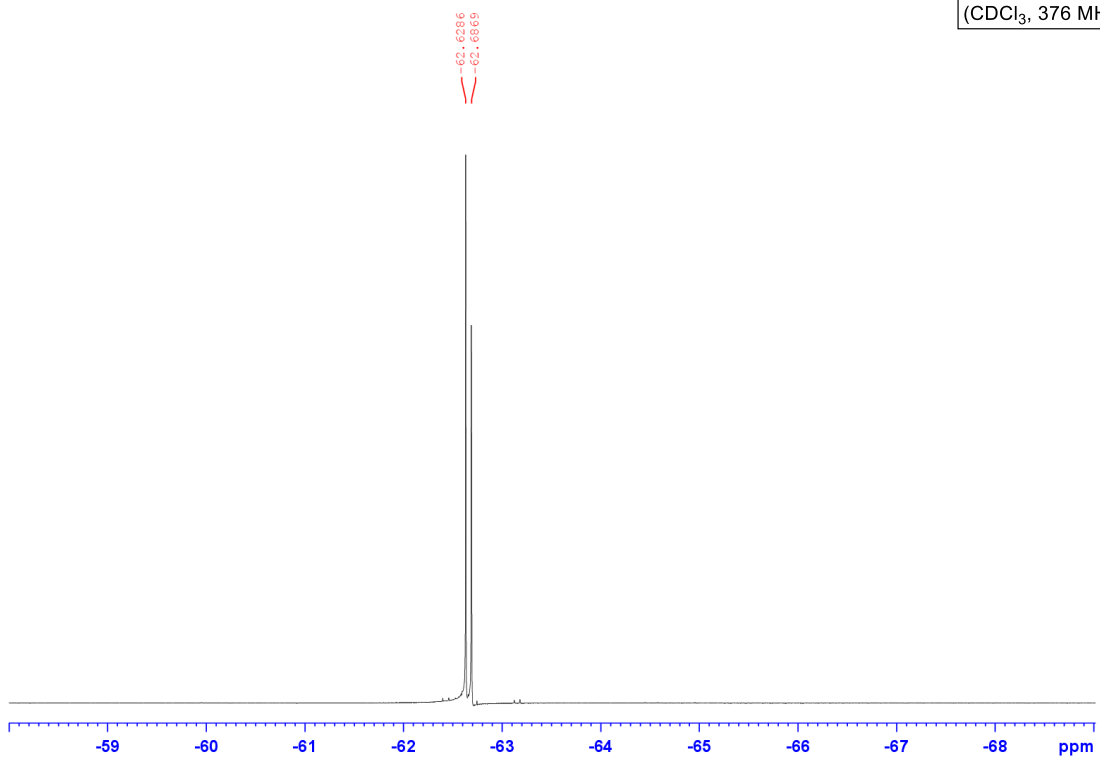

$^{31}\text{P}\{^1\text{H}\}$  NMR  
( $\text{CDCl}_3$ , 162 MHz)

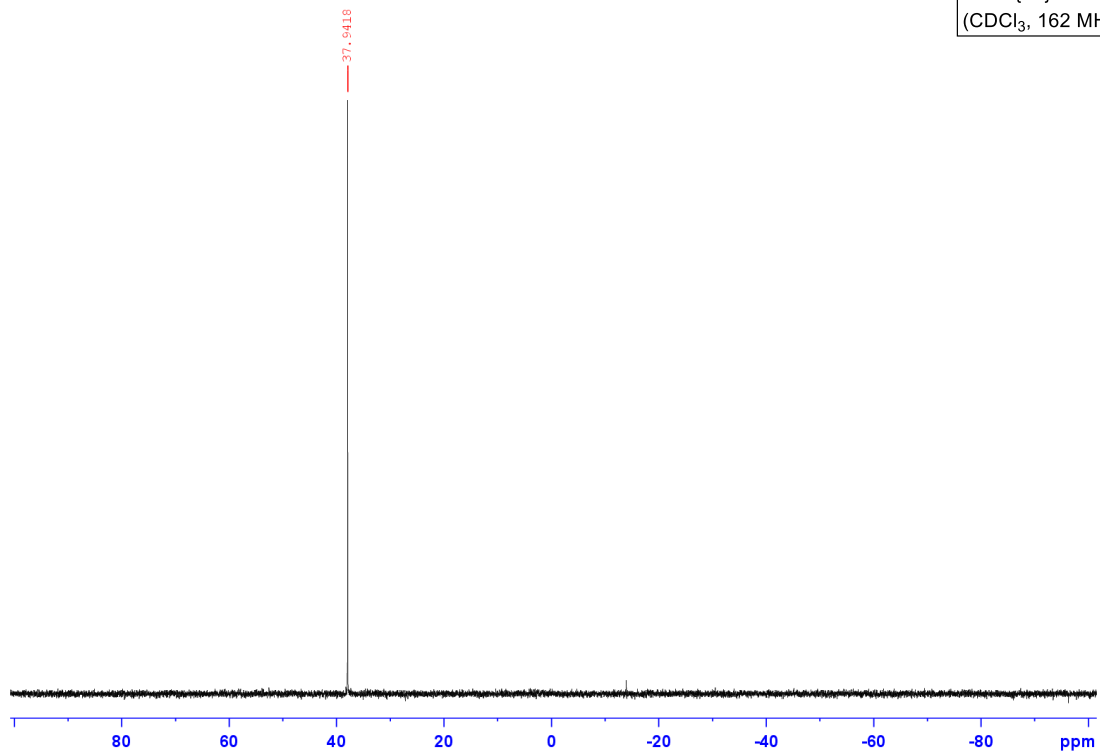

[<sup>1</sup>H, <sup>13</sup>C{<sup>1</sup>H}, <sup>19</sup>F{<sup>1</sup>H}, and <sup>31</sup>P{<sup>1</sup>H}] NMR Spectra of **4fa**]

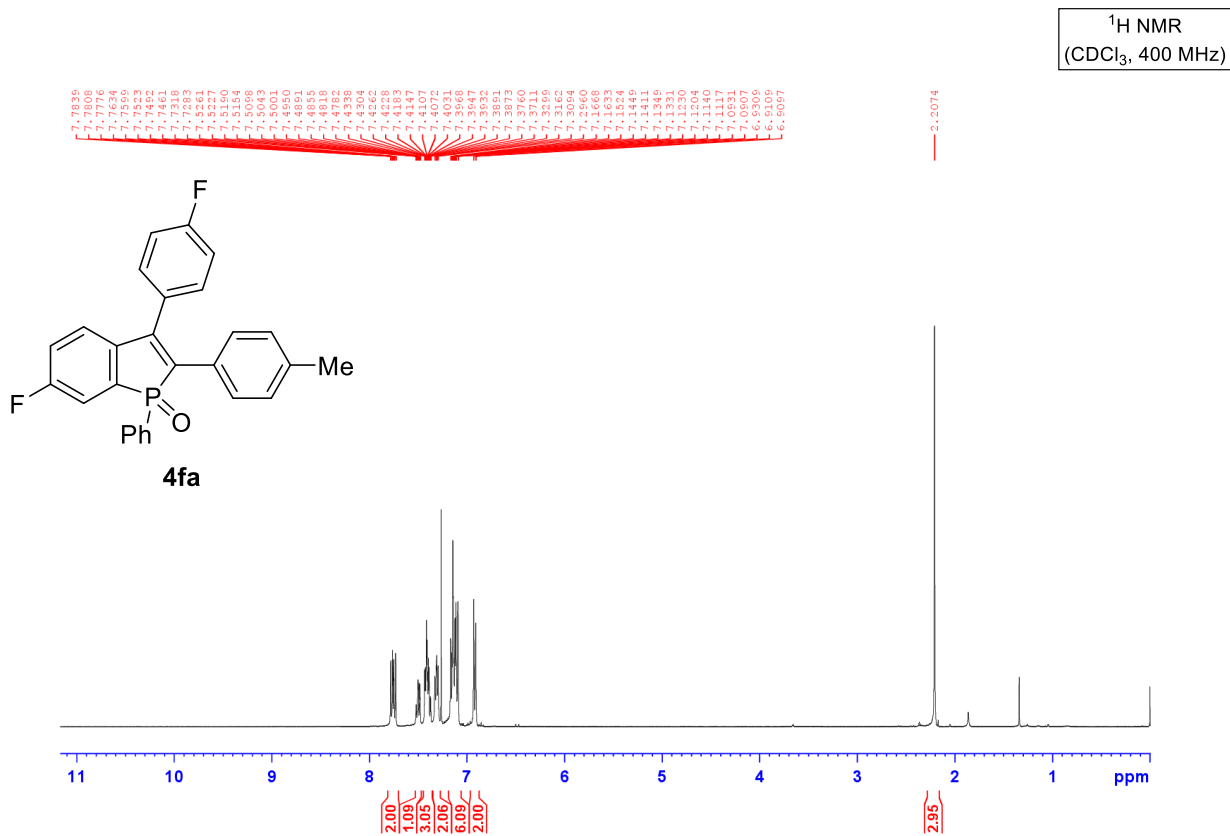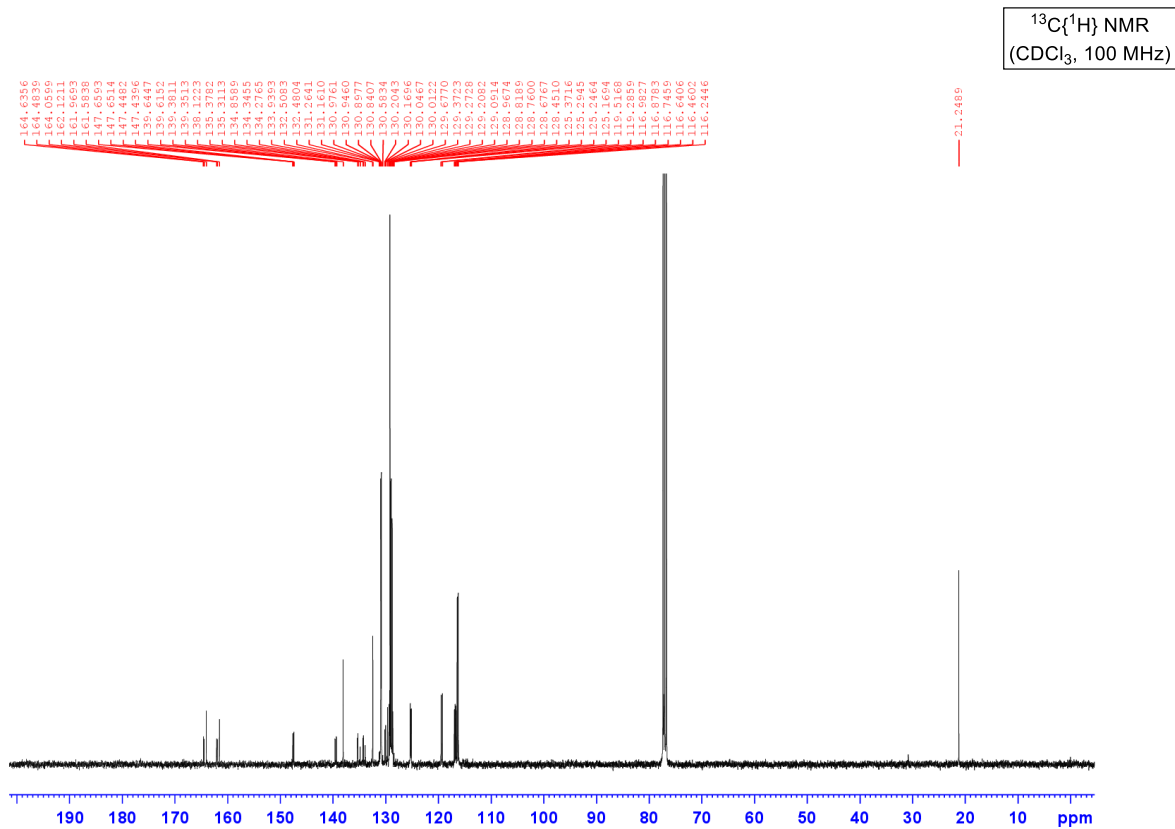

$^{19}\text{F}\{^1\text{H}\}$  NMR  
( $\text{CDCl}_3$ , 376 MHz)

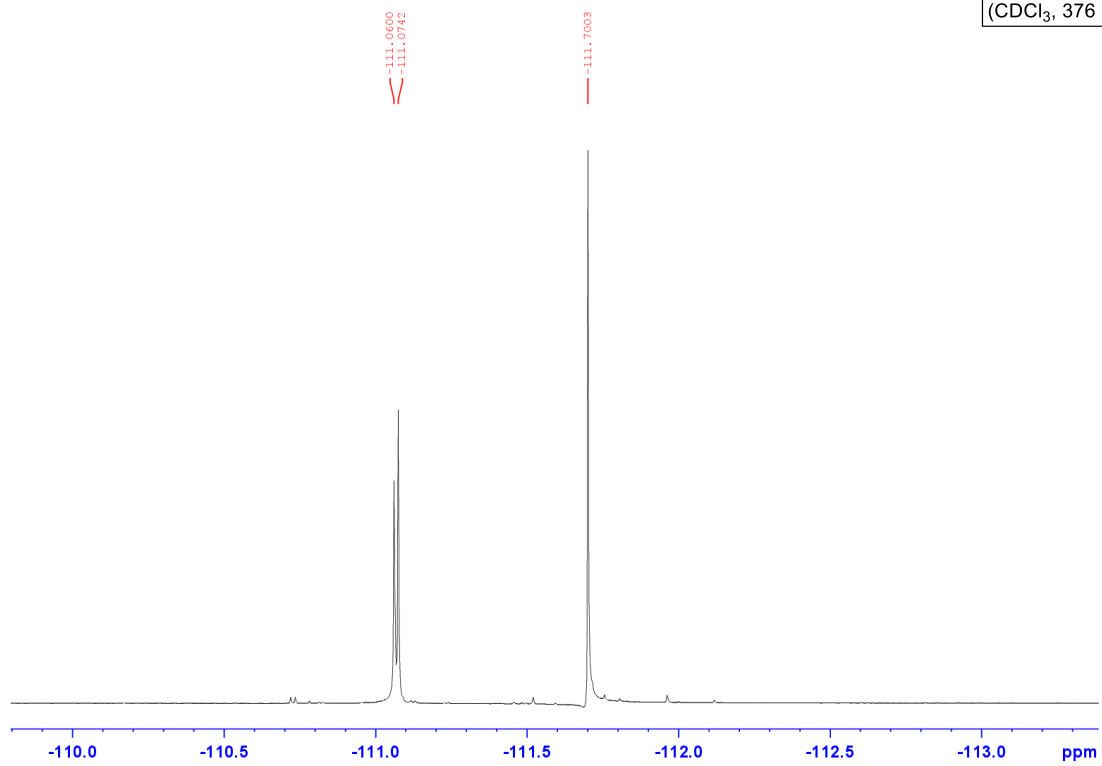

$^{31}\text{P}\{^1\text{H}\}$  NMR  
( $\text{CDCl}_3$ , 162 MHz)

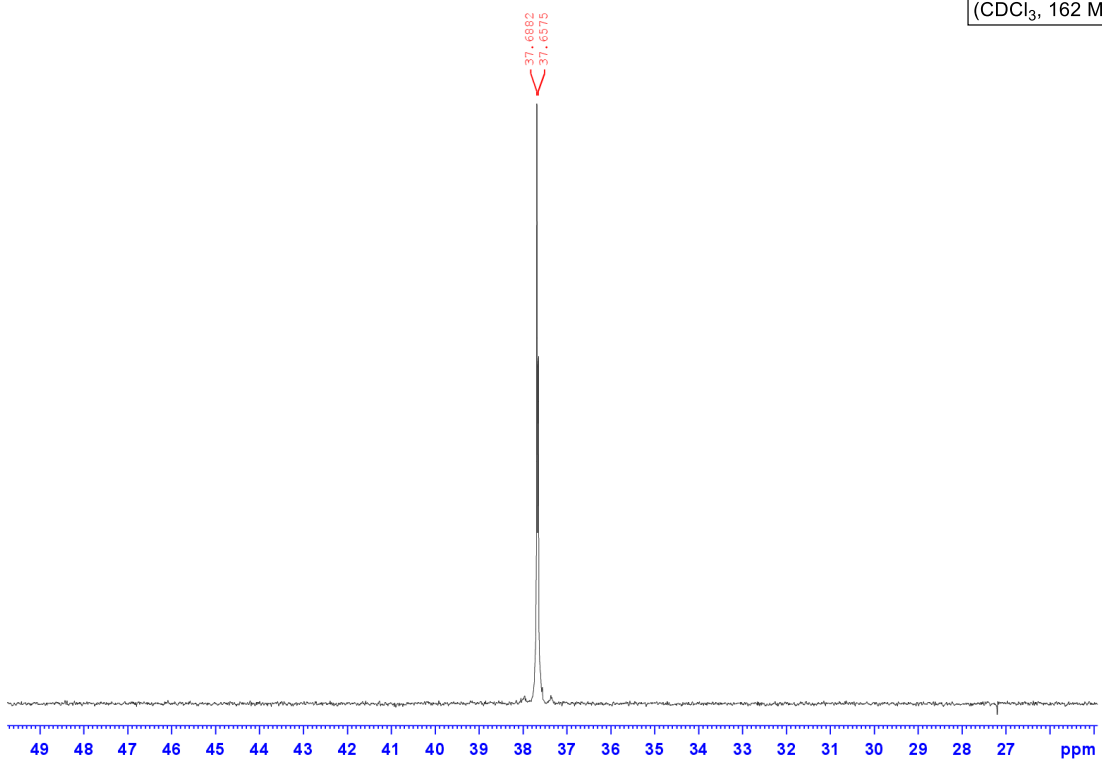

[<sup>1</sup>H, <sup>13</sup>C{<sup>1</sup>H}, and <sup>31</sup>P{<sup>1</sup>H}] NMR Spectra of **4ga**]

<sup>1</sup>H NMR  
(CDCl<sub>3</sub>, 400 MHz)

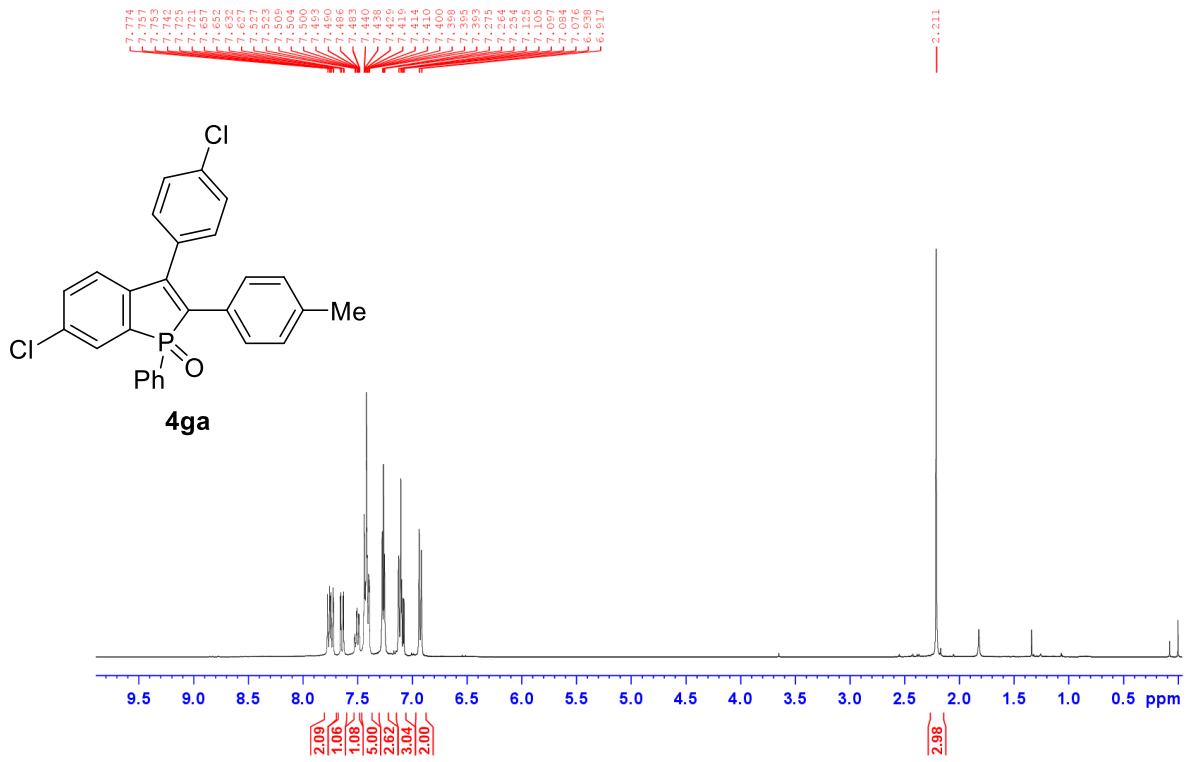

<sup>13</sup>C{<sup>1</sup>H} NMR  
(CDCl<sub>3</sub>, 100 MHz)

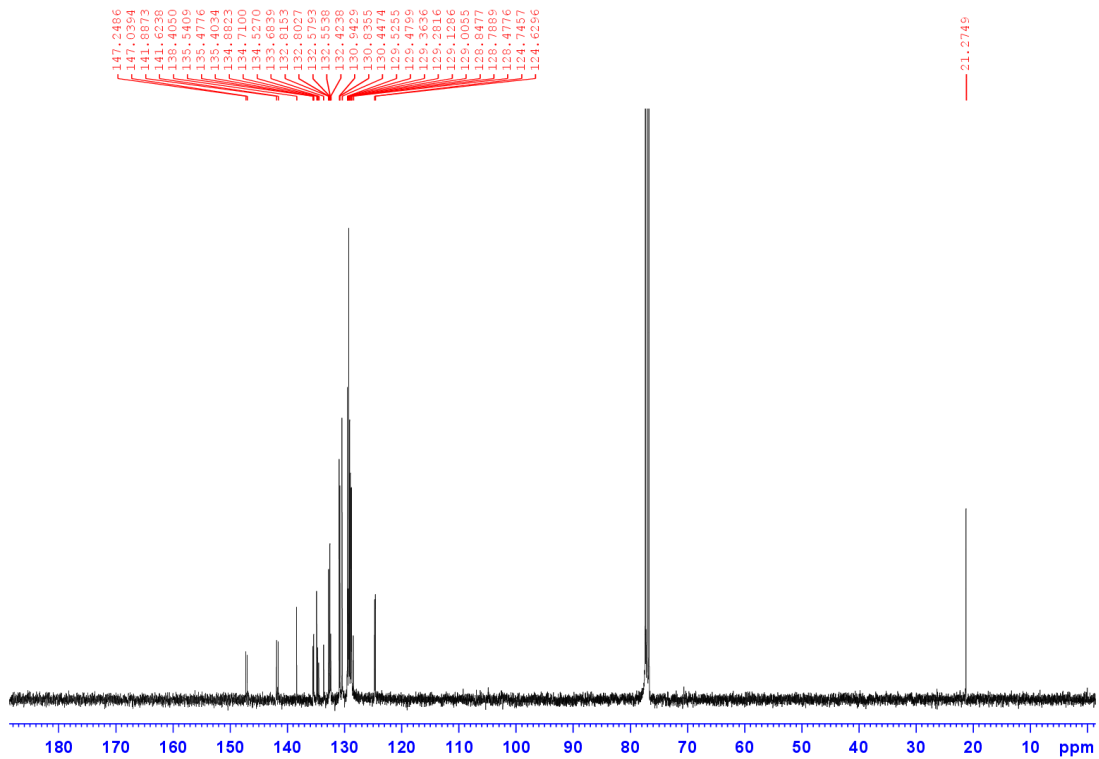



$^{31}\text{P}\{^1\text{H}\}$  NMR  
( $\text{CDCl}_3$ , 162 MHz)

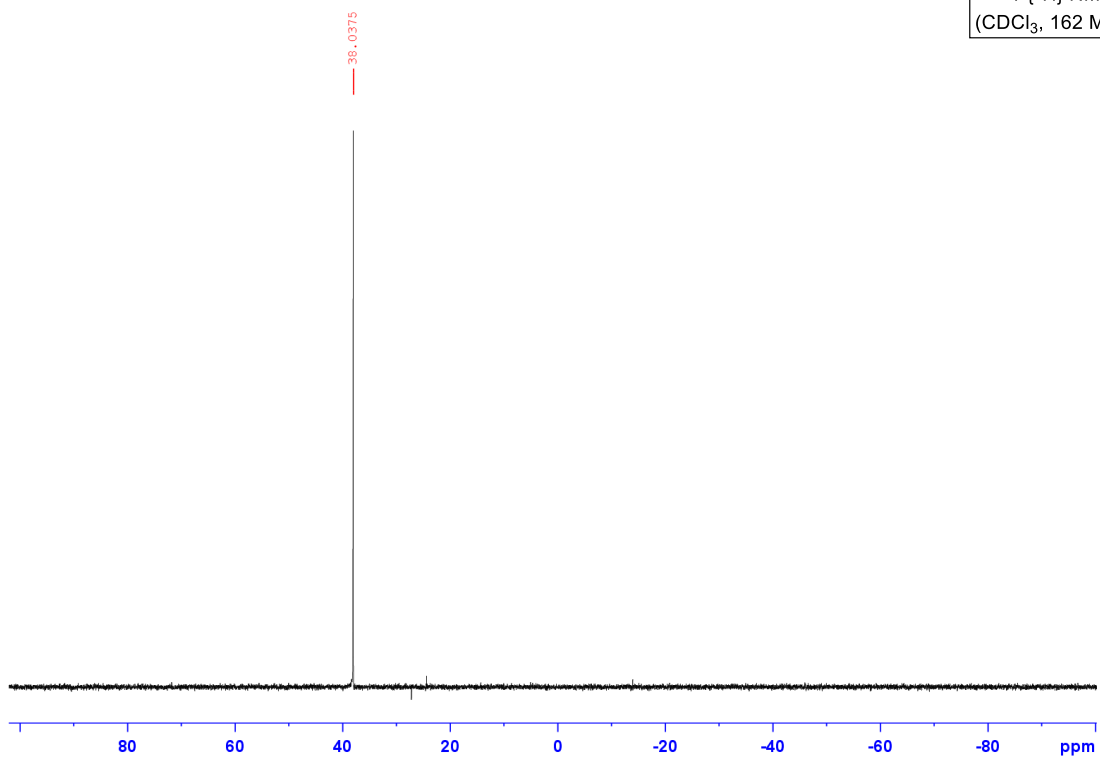



$^{31}\text{P}\{^1\text{H}\}$  NMR  
( $\text{CDCl}_3$ , 162 MHz)

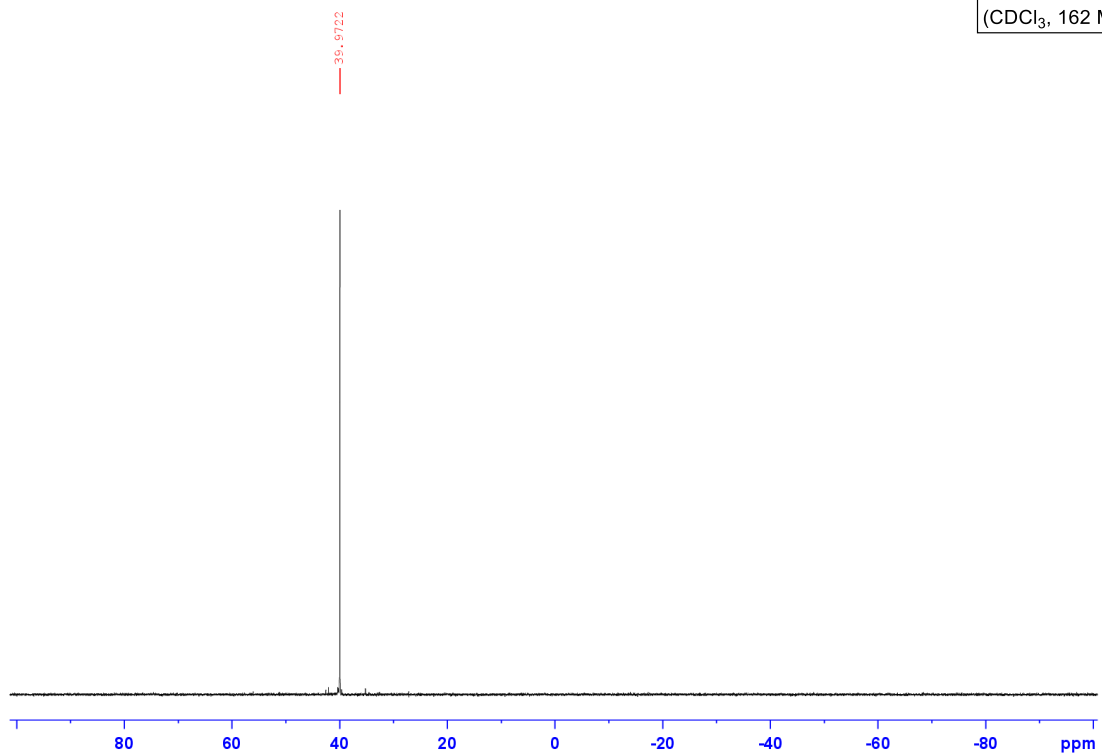

[<sup>1</sup>H, <sup>13</sup>C{<sup>1</sup>H}, and <sup>31</sup>P{<sup>1</sup>H}] NMR Spectra of **4ia**]

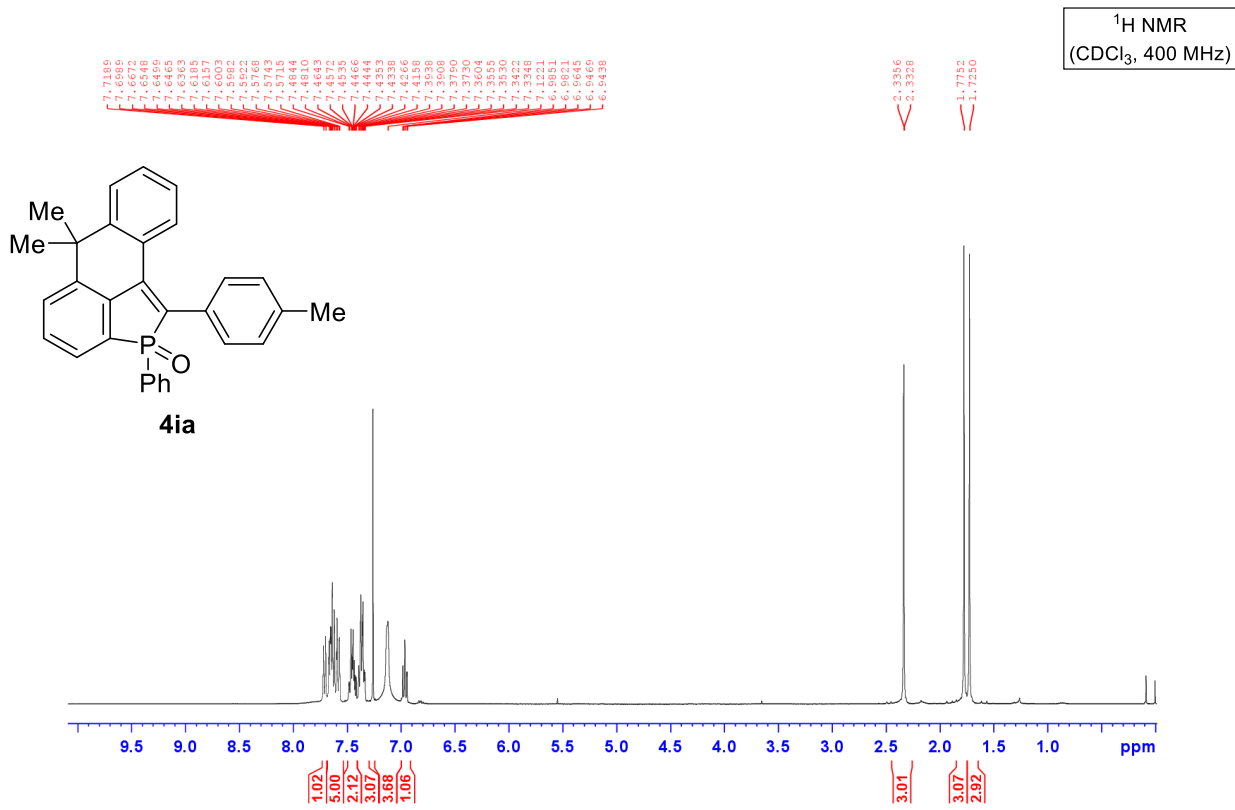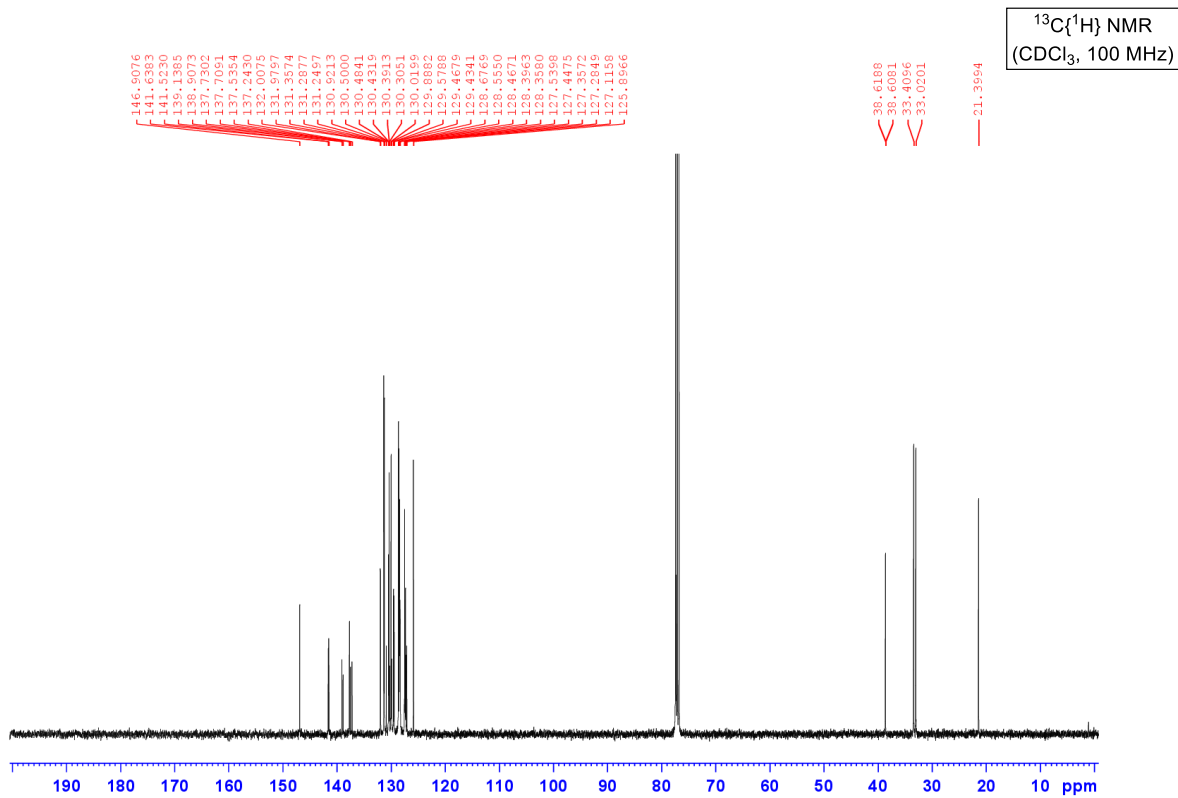

$^{31}\text{P}\{^1\text{H}\}$  NMR  
( $\text{CDCl}_3$ , 162 MHz)

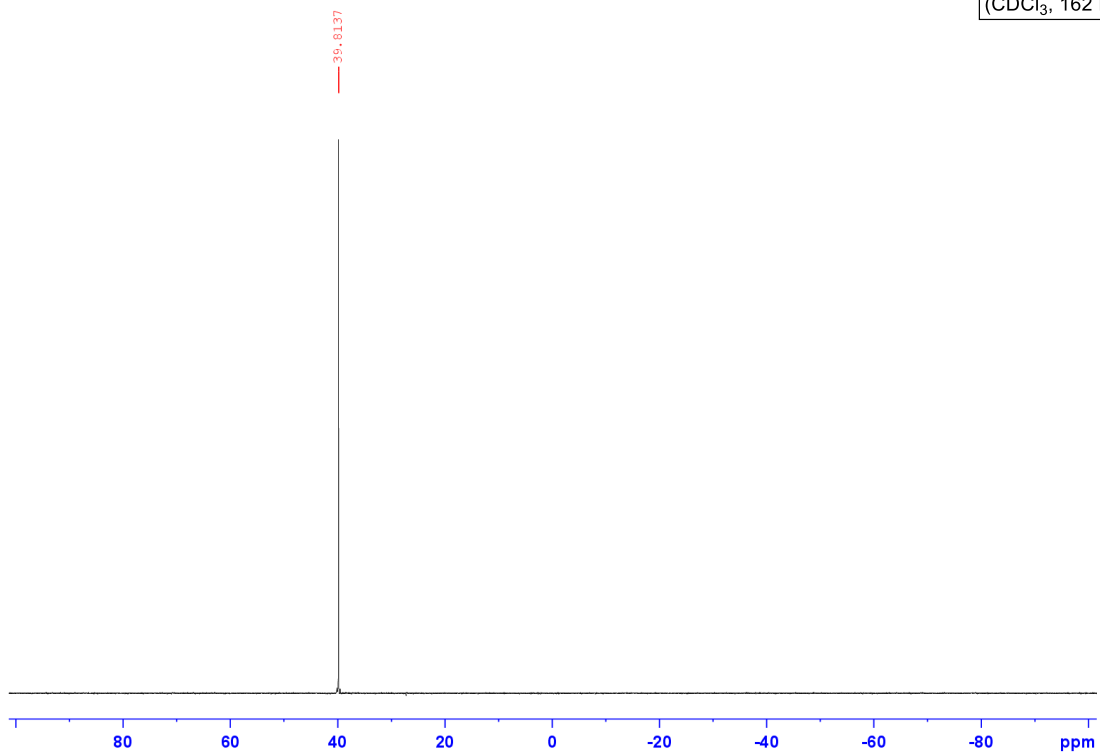

[<sup>1</sup>H, <sup>13</sup>C{<sup>1</sup>H}, and <sup>31</sup>P{<sup>1</sup>H}] NMR Spectra of **4ja**]

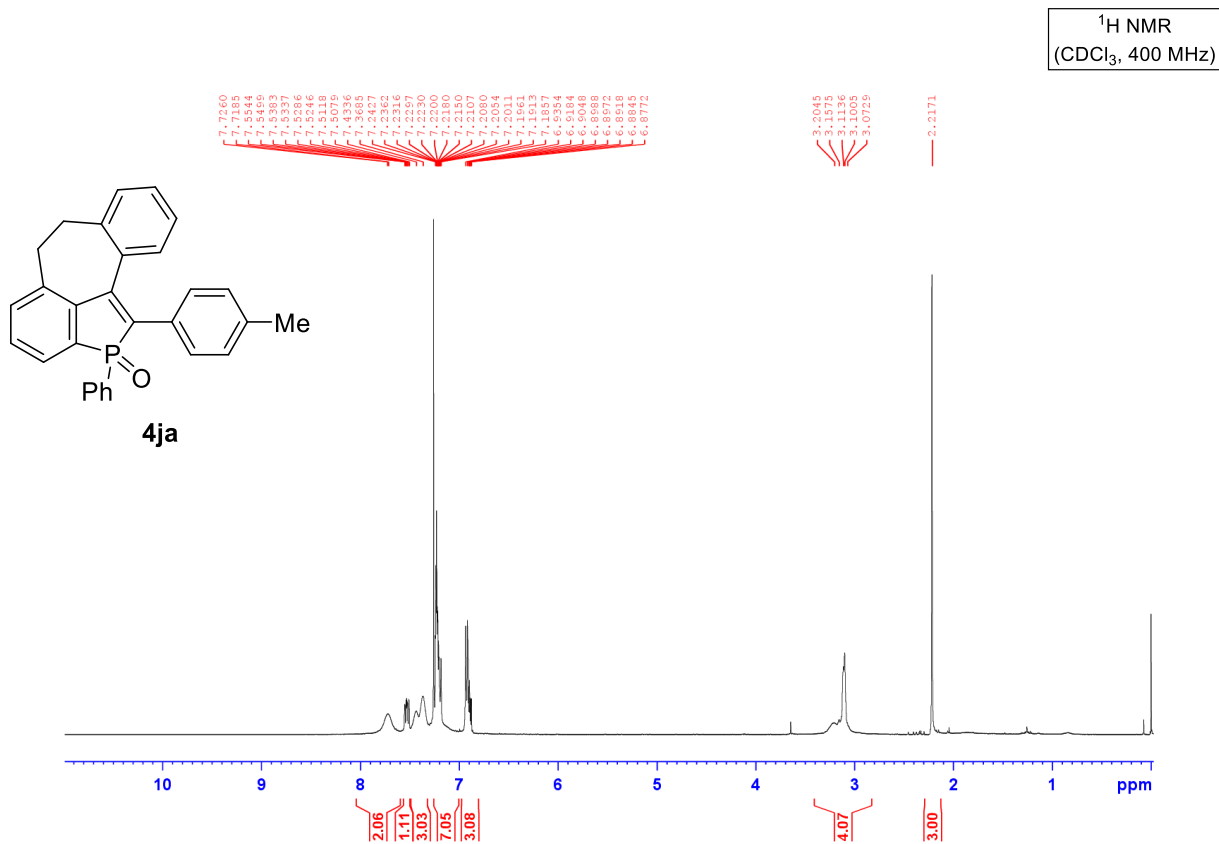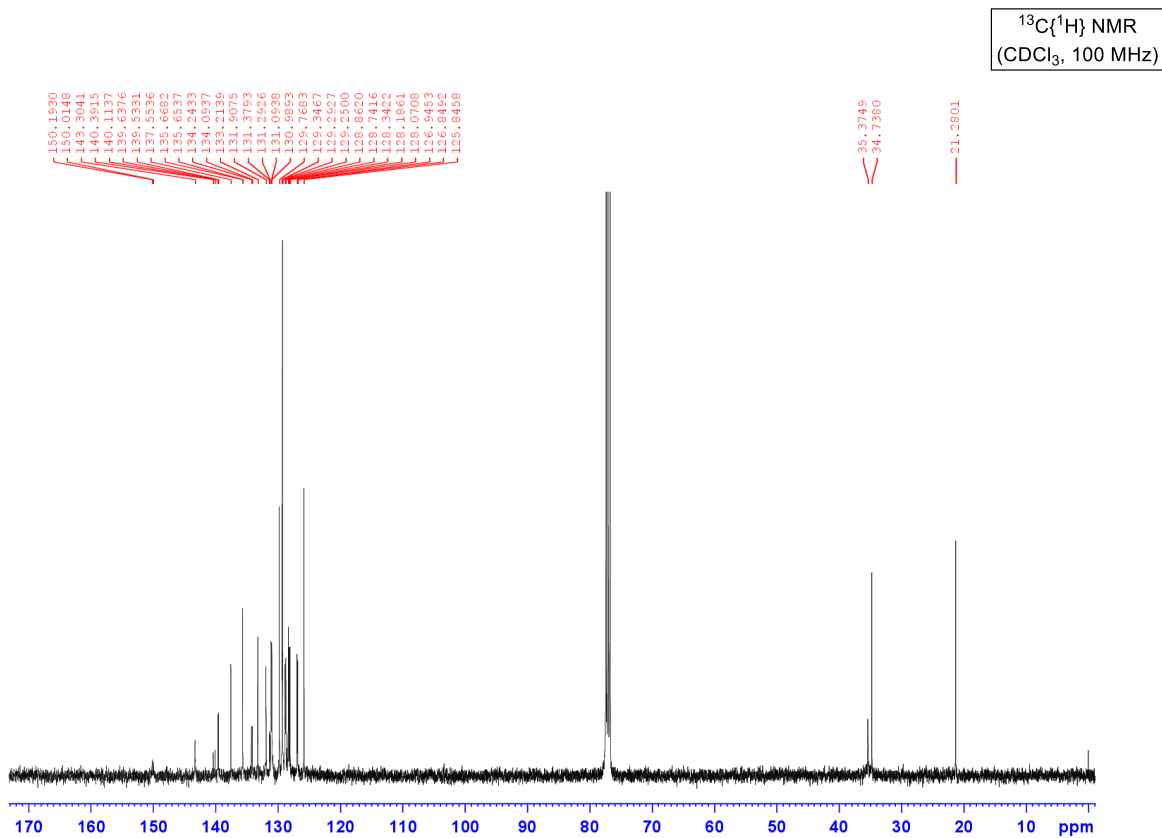

$^{31}\text{P}\{^1\text{H}\}$  NMR  
( $\text{CDCl}_3$ , 162 MHz)

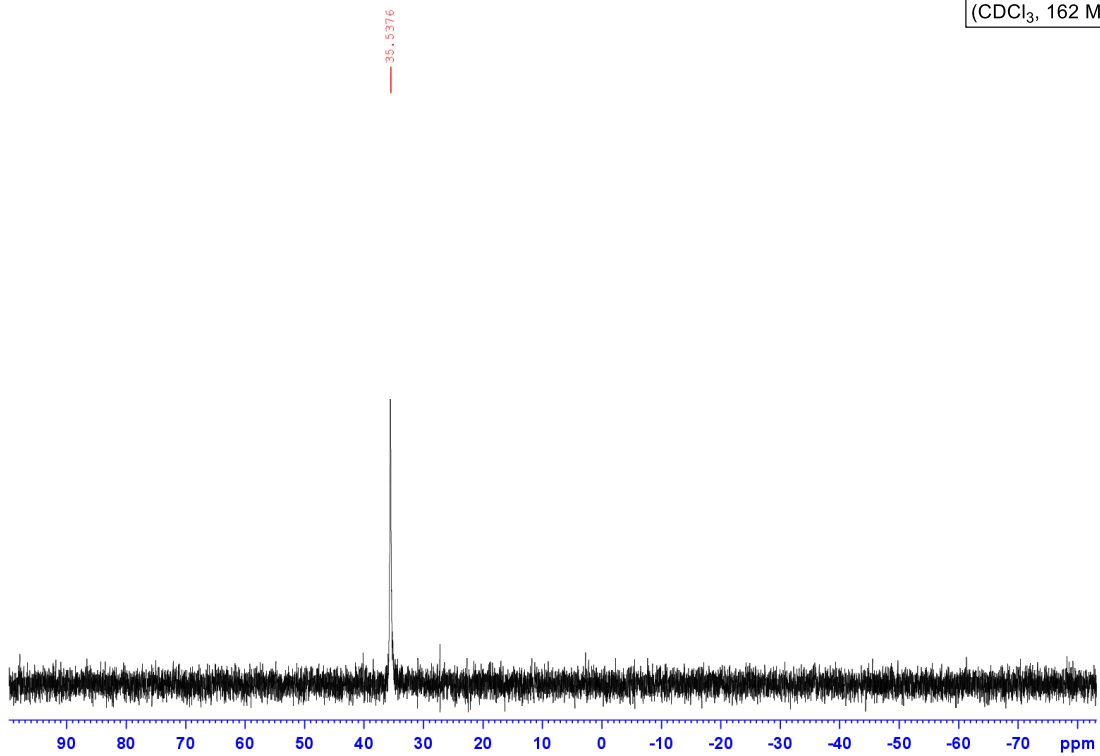

[<sup>1</sup>H, <sup>13</sup>C{<sup>1</sup>H}, and <sup>31</sup>P{<sup>1</sup>H} NMR Spectra of **5aa**]

<sup>1</sup>H NMR  
(CDCl<sub>3</sub>, 400 MHz)

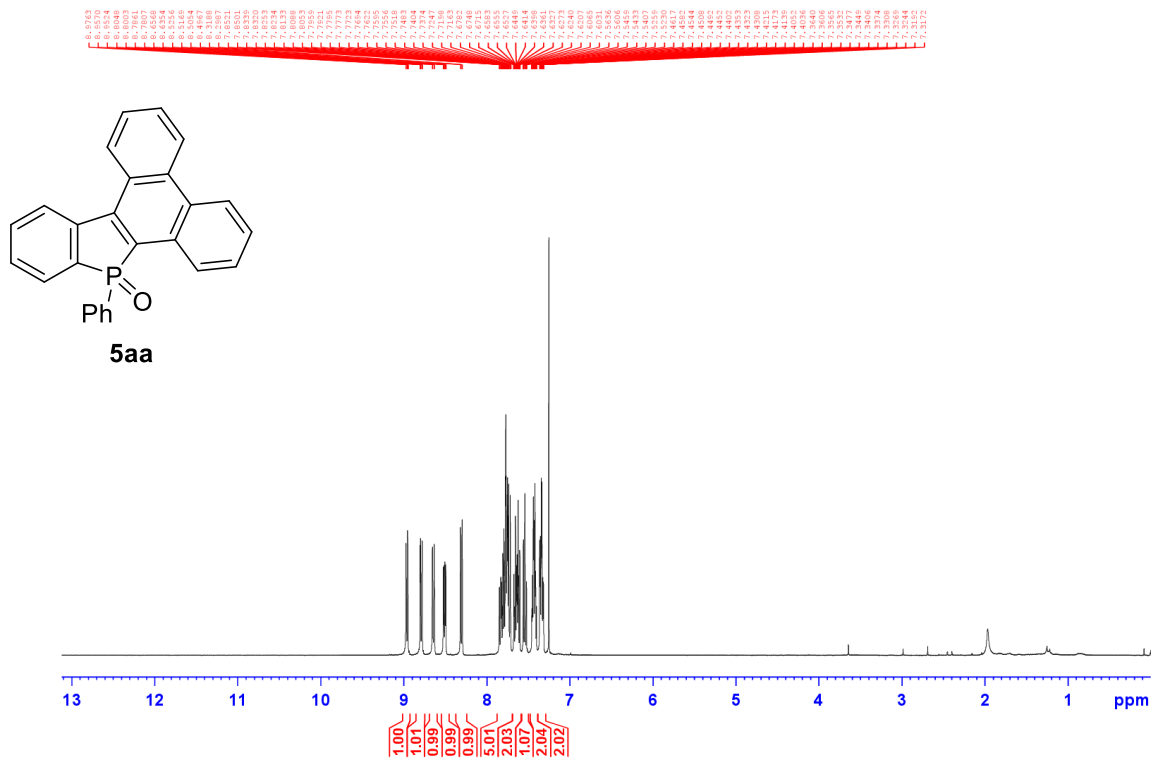

<sup>13</sup>C{<sup>1</sup>H} NMR  
(CDCl<sub>3</sub>, 100 MHz)

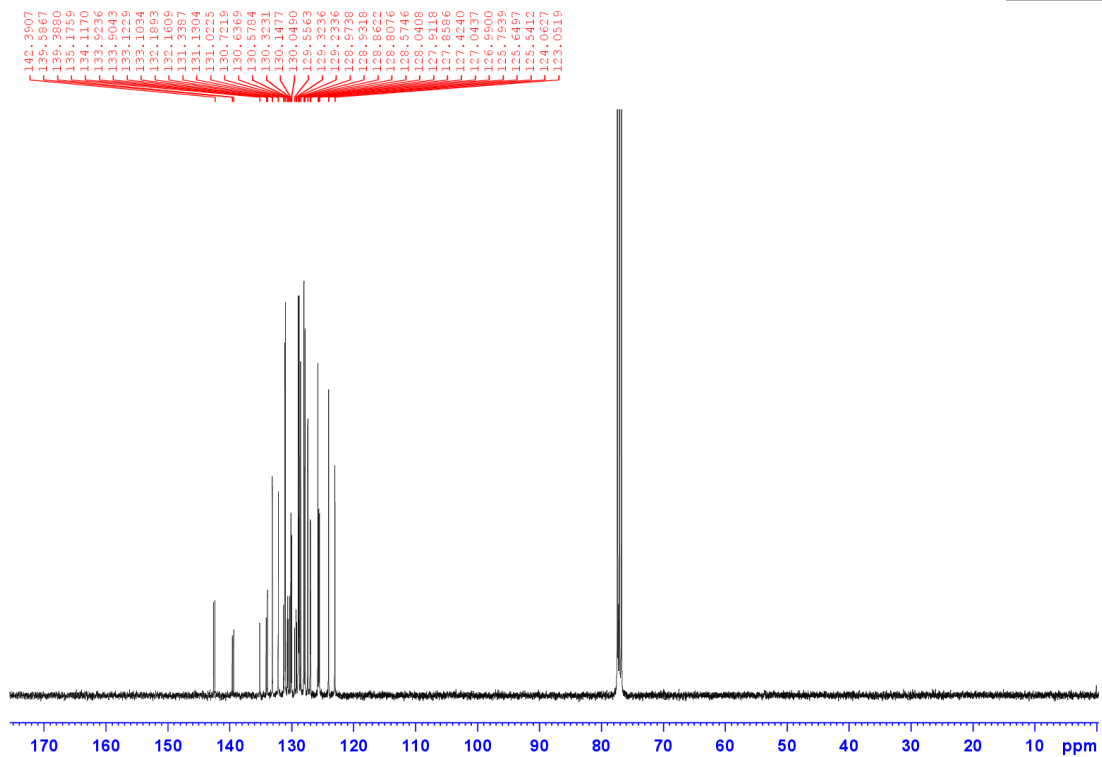



$^{31}\text{P}\{^1\text{H}\}$  NMR  
( $\text{CDCl}_3$ , 162 MHz)

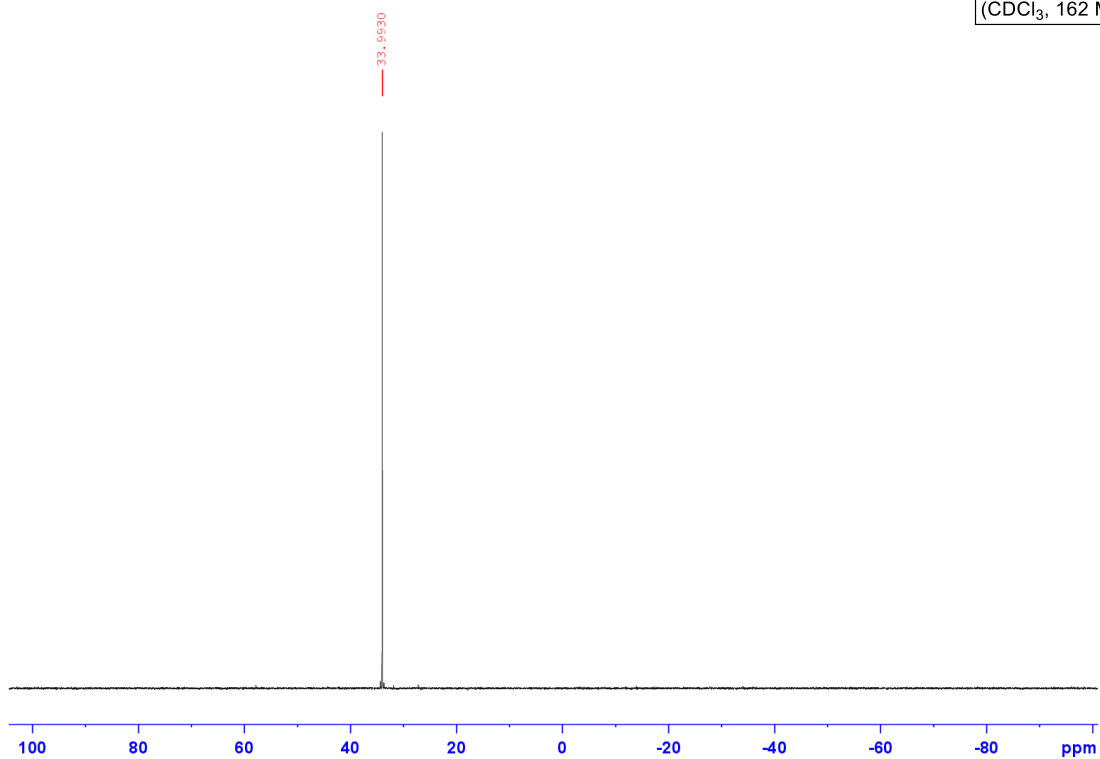

[<sup>1</sup>H, <sup>13</sup>C{<sup>1</sup>H}, and <sup>31</sup>P{<sup>1</sup>H} NMR Spectra of **5ab**]

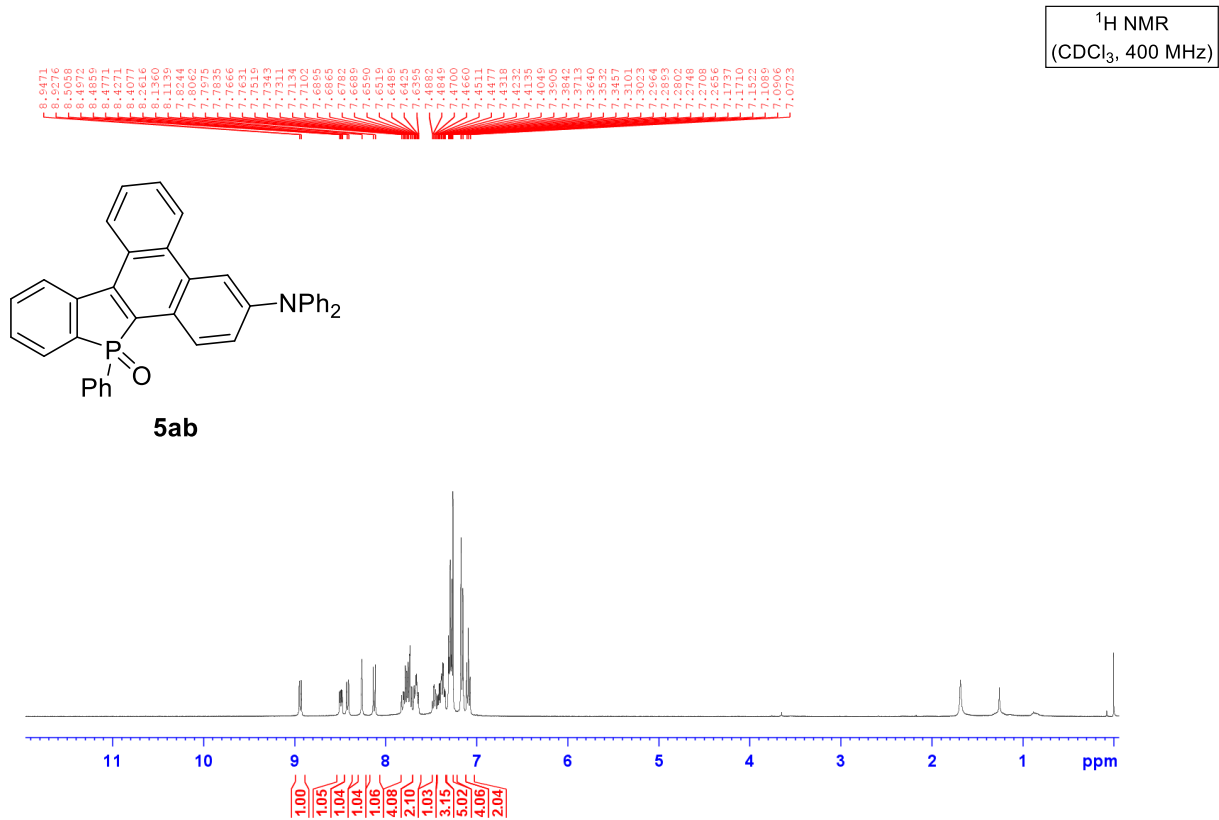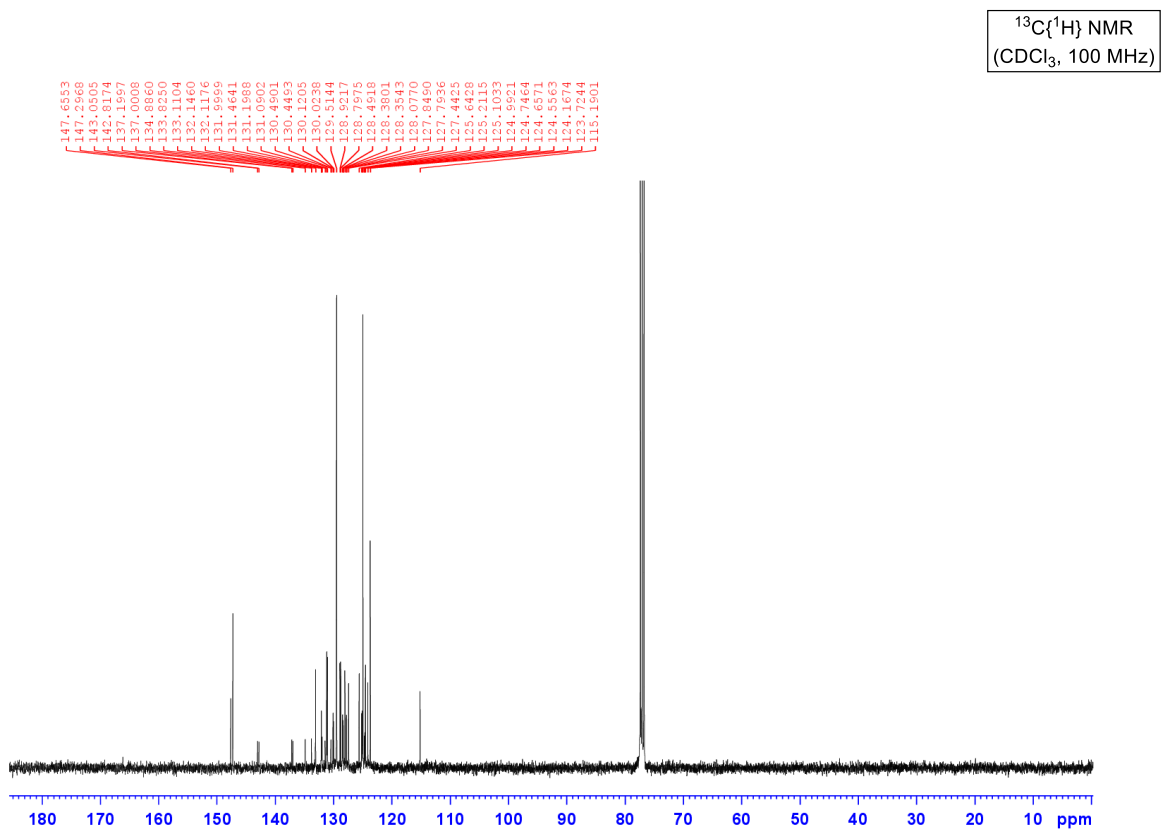

$^{31}\text{P}\{^1\text{H}\}$  NMR  
( $\text{CDCl}_3$ , 162 MHz)

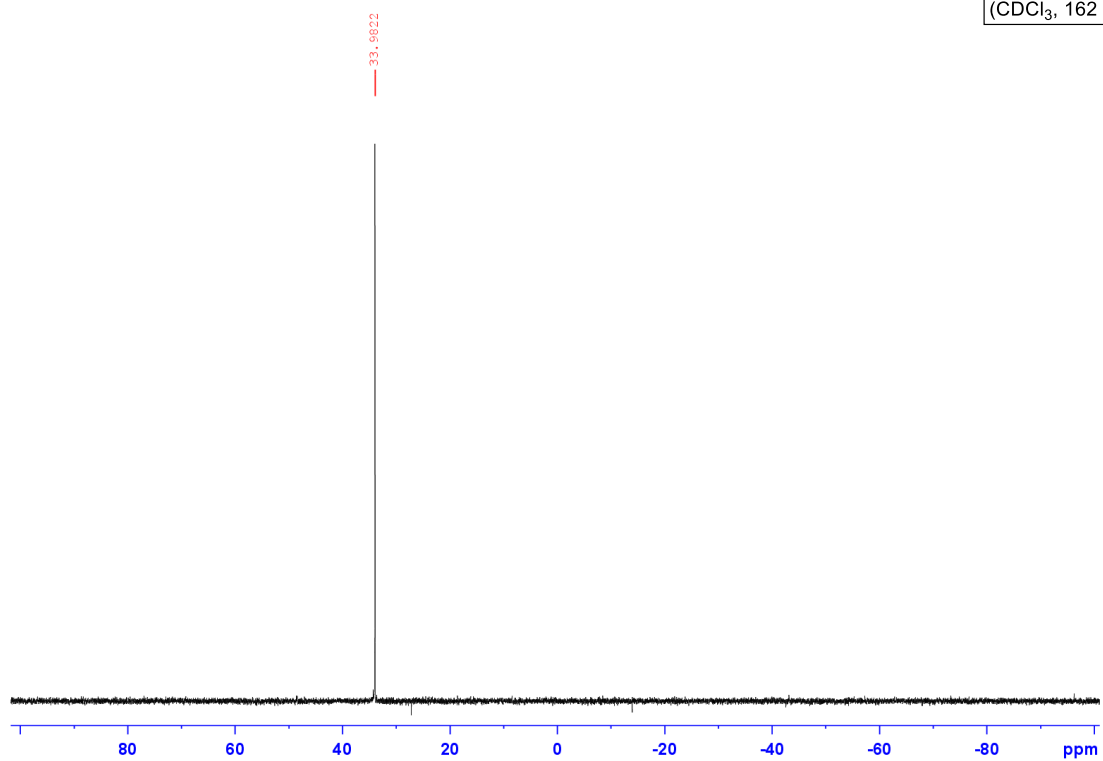

[<sup>1</sup>H, <sup>13</sup>C{<sup>1</sup>H}, and <sup>31</sup>P{<sup>1</sup>H} NMR Spectra of **5ac**]

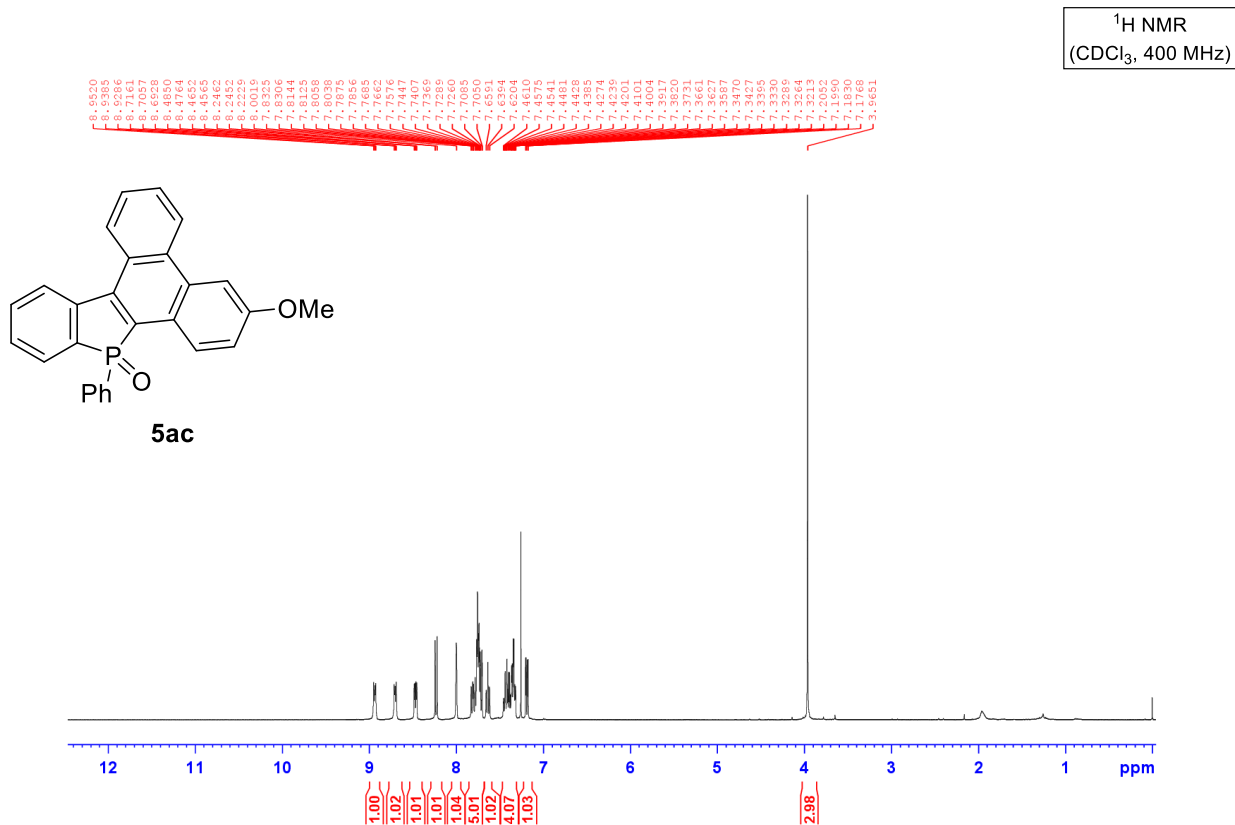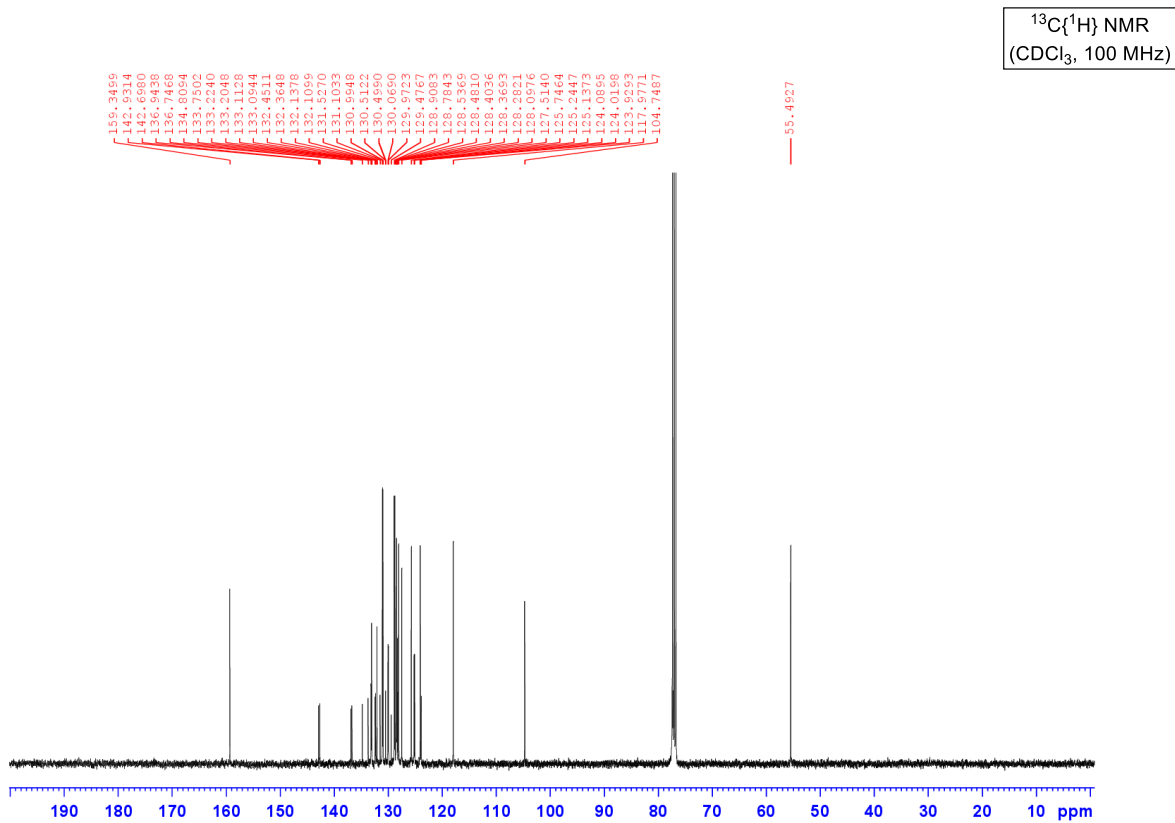

$^{31}\text{P}\{^1\text{H}\}$  NMR  
( $\text{CDCl}_3$ , 162 MHz)

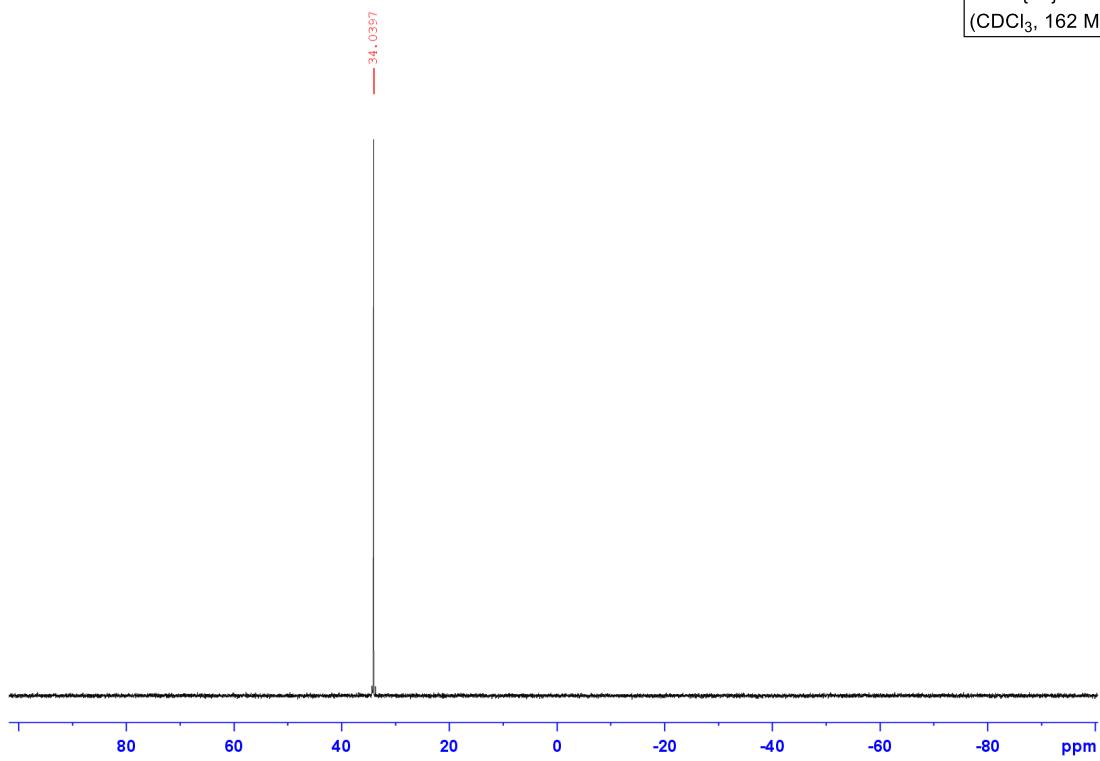

## References

(S1) T. H.H. Hsieh and V. M. Dong, *Tetrahedron*, 2009, **65**, 3062–3068.

(S2) Y. Kanazawa, T. Yokota, H. Ogasa, H. Watanabe, T. Hanakawa, S. Soga and M. Kawatsura, *Tetrahedron*, 2015, **71**, 1395–1402.

(S3) K. Nishimura, K. Hirano and M. Miura, *Org. Lett.*, 2020, **22**, 3185–3189.
